# Supplementary material for: Mycorrhizal associations drive the tradeoff between plant biomass and soil carbon accumulations in forest ecosystems under N deposition and warming
Source: Research Square preprint supplement (doi:10.21203/rs.3.rs-3011193/v1), 2023-06-13
Supplement: Supplementary file 1 [file 70a42f05664ecbc62a2ffec3.xlsx]

## Sheet: README
The list of abbreviation
TB	total biomass
AGB	aboveground biomass
RB	root biomass
R/S	root biomass/shoot biomass
LB	leaf biomass
SB	stem biomass
CRB	coarse root biomass
FRB	fine root biomass
LM	litter mass
SOCS	soil organic carbon stocks
MBC	microbial biomass carbon
SR	soil respiration
MAT	annual average temperature
MAP	annual average precipitation
AM	arbuscular mycorrhiza
ECM	ectotrophic mycorrhiza

## Sheet: Supplementary Data 1a
Database 1: The database of carbon-related variables under nitrogen deposition effects
No	Reference	Treatment	Variables	Tree species	Mycorrhizal fungi type	Mean in Control	Standard deviation in Control	Mean in treatment group	Standard deviation in treatment group	Replicates in Control group	Replicates in treatment group
1	ZhangA et al, 2019	nitrogen deposition	TB (total biomass)	Schima superba	AM	0.0877193	0.0263157	0.0789474	0.0350876	6	6
2	ZhangA et al, 2019	nitrogen deposition	TB (total biomass)	Pinus massoniana	ECM	0.192982	0.061404	0.157895	0.043859	6	6
3	Xie et al, 2019	nitrogen deposition	TB (total biomass)	Ormosia semicastrata	AM	0.934211	0.315789	0.921053	0.065789	6	6
4	Tripathi et al, 2014	nitrogen deposition	TB (total biomass)	Bridelia retusa	ECM	1.90661	0.2022	4.94163	0.0673941	3	3
5	ZhangA et al, 2019	nitrogen deposition	TB (total biomass)	Schima superba	AM	0.0877193	0.0263157	0.105263	0.070176	6	6
6	Wang et al, 2017	nitrogen deposition	TB (total biomass)	Semiliquidambar cathayensis	AM	9.52454	0.23006	11.8252	0.0766	6	6
7	Wang et al, 2017	nitrogen deposition	TB (total biomass)	Symplocos tetagona	AM	7.83742	0.38344	8.29755	0.07668	6	6
8	Wang et al, 2017	nitrogen deposition	TB (total biomass)	Symplocos tetagona	AM	7.83742	0.38344	7.60736	0.07669	6	6
9	Wang et al, 2017	nitrogen deposition	TB (total biomass)	Symplocos tetagona	AM	7.83742	0.38344	7.91411	0.07669	6	6
10	Xie et al, 2019	nitrogen deposition	TB (total biomass)	Ormosia semicastrata	AM	0.934211	0.315789	0.671053	0.078947	6	6
11	Xie et al, 2019	nitrogen deposition	TB (total biomass)	Ormosia semicastrata	AM	0.934211	0.315789	0.342105	0.078948	6	6
12	Chang et al, 2019	nitrogen deposition	TB (total biomass)	Castanopsis fargesii	ECM	0.0537634	0.0215054	0.311828	0.107527	3	3
13	Xie et al, 2019	nitrogen deposition	TB (total biomass)	Ormosia balansae	AM	3.13287	0.33566	0.195804	0.111888	6	6
14	ZhangA et al, 2019	nitrogen deposition	TB (total biomass)	Pinus massoniana	ECM	0.192982	0.061404	0.359649	0.114035	6	6
15	Xie et al, 2019	nitrogen deposition	TB (total biomass)	Archidendron clypearia	ECM	1.28947	0.10527	0.381579	0.118421	6	6
16	ZhangA et al, 2019	nitrogen deposition	TB (total biomass)	Schima superba	AM	0.0877193	0.0263157	0.157895	0.122807	6	6
17	ZhangA et al, 2019	nitrogen deposition	TB (total biomass)	Schima superba	AM	0.0877193	0.0263157	0.175439	0.131579	6	6
18	Xie et al, 2019	nitrogen deposition	TB (total biomass)	Archidendron clypearia	ECM	1.28947	0.10527	1.43421	0.13158	6	6
19	Tripathi et al, 2014	nitrogen deposition	TB (total biomass)	Lagerstroemia parviflra	ECM	1.75097	0.134788	3.89105	0.134788	3	3
20	Tripathi et al, 2014	nitrogen deposition	TB (total biomass)	Lagerstroemia parviflra	ECM	1.75097	0.134788	2.52918	0.134788	3	3
21	Tripathi et al, 2014	nitrogen deposition	TB (total biomass)	Bridelia retusa	ECM	1.90661	0.2022	3.54086	0.134788	3	3
22	Tripathi et al, 2014	nitrogen deposition	TB (total biomass)	Dalbergia sissoo	AM	2.91829	0.134788	5.75875	0.134806	3	3
23	ZhangA et al, 2019	nitrogen deposition	TB (total biomass)	Pinus massoniana	ECM	0.192982	0.061404	0.359649	0.149123	6	6
24	Xie et al, 2019	nitrogen deposition	TB (total biomass)	Archidendron clypearia	ECM	1.28947	0.10527	0.684211	0.157894	6	6
25	ZhangA et al, 2019	nitrogen deposition	TB (total biomass)	Pinus massoniana	ECM	0.192982	0.061404	0.447368	0.166667	6	6
26	Zhao et al, 2009	nitrogen deposition	TB (total biomass)	Pinus tabulaeformis	ECM	10	0.6722	13.9496	0.168	4	4
27	Xie et al, 2019	nitrogen deposition	TB (total biomass)	Ormosia balansae	AM	3.13287	0.33566	1.23077	0.1958	6	6
28	Xie et al, 2019	nitrogen deposition	TB (total biomass)	Ormosia semicastrata	AM	0.934211	0.315789	0.907895	0.197365	6	6
29	Tripathi et al, 2014	nitrogen deposition	TB (total biomass)	Terminalia arjuna	AM	14.7082	0.606564	25.0973	0.20213	3	3
30	Tripathi et al, 2014	nitrogen deposition	TB (total biomass)	Bridelia retusa	ECM	1.90661	0.2022	4.63035	0.202182	3	3
31	Tripathi et al, 2014	nitrogen deposition	TB (total biomass)	Acacia catechu	AM	2.37354	0.202182	5.1751	0.202182	3	3
32	Tripathi et al, 2014	nitrogen deposition	TB (total biomass)	Acacia catechu	AM	2.37354	0.202182	3.57977	0.202182	3	3
33	Tripathi et al, 2014	nitrogen deposition	TB (total biomass)	Lagerstroemia parviflra	ECM	1.75097	0.134788	3.3463	0.2022	3	3
34	Tripathi et al, 2014	nitrogen deposition	TB (total biomass)	Terminalia arjuna	AM	14.7082	0.606564	22.7626	0.202304	3	3
35	Pei et al, 2019	nitrogen deposition	TB (total biomass)	Toona sinensis	ECM	2.06	0.15	2.6	0.21	10	10
36	Xie et al, 2019	nitrogen deposition	TB (total biomass)	Archidendron clypearia	ECM	1.28947	0.10527	1.23684	0.21053	6	6
37	Wang et al, 2017	nitrogen deposition	TB (total biomass)	Semiliquidambar cathayensis	AM	9.52454	0.23006	11.135	0.23	6	6
38	Wang et al, 2017	nitrogen deposition	TB (total biomass)	Symplocos tetagona	AM	7.83742	0.38344	6.61043	0.23006	6	6
39	Chang et al, 2019	nitrogen deposition	TB (total biomass)	Cyclobalanopsis jensenniana	AM	0.27957	0.064516	1.1828	0.25806	3	3
40	Tripathi et al, 2014	nitrogen deposition	TB (total biomass)	Dalbergia sissoo	AM	2.37354	0.202182	5.21401	0.269576	3	3
41	Tripathi et al, 2014	nitrogen deposition	TB (total biomass)	Acacia catechu	AM	2.91829	0.134788	5.83658	0.269576	3	3
42	Pei et al, 2019	nitrogen deposition	TB (total biomass)	Toona sinensis	ECM	2.06	0.15	2.89	0.29	10	10
43	Wang et al, 2017	nitrogen deposition	TB (total biomass)	Tsoongiodendrn odorum	AM	7.76074	0.15337	11.8252	0.3067	6	6
44	Xie et al, 2019	nitrogen deposition	TB (total biomass)	Ormosia balansae	AM	3.13287	0.33566	2.99301	0.33566	6	6
45	Zhao et al, 2009	nitrogen deposition	TB (total biomass)	Picea asperata	ECM	5.71429	0.33612	7.39496	0.33614	4	4
46	Tripathi et al, 2014	nitrogen deposition	TB (total biomass)	Dalbergia sissoo	AM	2.91829	0.134788	4.31907	0.33697	3	3
47	Wang et al, 2017	nitrogen deposition	TB (total biomass)	Semiliquidambar cathayensis	AM	7.76074	0.15337	11.0583	0.3834	6	6
48	Wang et al, 2017	nitrogen deposition	TB (total biomass)	Tsoongiodendrn odorum	AM	9.52454	0.23006	14.2025	0.3834	6	6
49	Wang et al, 2017	nitrogen deposition	TB (total biomass)	Tsoongiodendrn odorum	AM	7.76074	0.15337	9.21779	0.38344	6	6
50	Tripathi et al, 2014	nitrogen deposition	TB (total biomass)	Terminalia arjuna	AM	14.7082	0.606564	18.9105	0.404434	3	3
51	Pei et al, 2019	nitrogen deposition	TB (total biomass)	Toona sinensis	ECM	2.06	0.15	4.31	0.42	10	10
52	Wang et al, 2017	nitrogen deposition	TB (total biomass)	Semiliquidambar cathayensis	AM	9.52454	0.23006	14.0491	0.4601	6	6
53	Mo et al, 2008	nitrogen deposition	TB (total biomass)	Schima superba	AM	7.07	0.536936	4.25	0.467654	3	3
54	Xie et al, 2019	nitrogen deposition	TB (total biomass)	Ormosia balansae	AM	3.13287	0.33566	1.87413	0.47552	6	6
55	Hatenschwiler et al, 1997	nitrogen deposition	TB (total biomass)	Picea abies	ECM	5.48	0.225167	5.5	0.502295	3	3
56	Hatenschwiler et al, 1997	nitrogen deposition	TB (total biomass)	Picea abies	ECM	5.48	0.225167	5.63	0.536936	3	3
57	Chang et al, 2019	nitrogen deposition	TB (total biomass)	Quercus acutissima	ECM	0.784946	0.161291	2.03226	0.56989	3	3
58	Wang et al, 2017	nitrogen deposition	TB (total biomass)	Tsoongiodendrn odorum	AM	7.76074	0.15337	12.8221	0.6135	6	6
59	Wang et al, 2014	nitrogen deposition	TB (total biomass)	Quercus chenii	ECM	13.84	1.39	12.15	0.66	5	5
60	Pei et al, 2019	nitrogen deposition	TB (total biomass)	Toona sinensis	ECM	2.06	0.15	6.8	0.67	10	10
61	Zhao et al, 2011	nitrogen deposition	TB (total biomass)	Populus cathayana	AM	10.46	0.715542	11.97	0.715542	5	5
62	Ambebe et al, 2009	nitrogen deposition	TB (total biomass)	Betula papyrifera	ECM	2.49077	0.18451	8.30258	0.73801	4	4
63	Zhang et al, 2013	nitrogen deposition	TB (total biomass)	Schima superba	AM	2.05102	1.10204	2.32653	0.76531	9	9
64	Guo et al, 2014	nitrogen deposition	TB (total biomass)	Acer truncatum	AM	9.39297	5.03564	9.05751	0.774712	3	3
65	Pei et al, 2019	nitrogen deposition	TB (total biomass)	Toona sinensis	ECM	2.06	0.15	8.34	0.78	3	3
66	Wang et al, 2014	nitrogen deposition	TB (total biomass)	Quercus fabri	ECM	7.52	1.17	11.45	0.81	5	5
67	Zhang et al, 2013	nitrogen deposition	TB (total biomass)	Schima superba	AM	1.95918	0.76531	3.09184	0.82653	9	9
68	Zhao et al, 2012	nitrogen deposition	TB (total biomass)	Pinus tabulaeformis	ECM	10.0641	0.833333	13.9744	0.833333	4	4
69	Ambebe et al, 2009	nitrogen deposition	TB (total biomass)	Betula papyrifera	ECM	2.49077	0.18451	12.8229	1.0147	4	4
70	Wang et al, 2014	nitrogen deposition	TB (total biomass)	Quercus glandulifera	ECM	5.34	1.02	5.92	1.03	5	5
71	Mo et al, 2008	nitrogen deposition	TB (total biomass)	Schima superba	AM	7.07	0.536936	5.01	1.03923	3	3
72	Li et al, 2016	nitrogen deposition	TB (total biomass)	Larix olgensis	ECM	46.09	1.45344	80.52	1.09567	5	5
73	Liu et al, 2015	nitrogen deposition	TB (total biomass)	Pinus massoniana	ECM	166.237	33.505	32.2165	1.2887	6	6
74	Zhang et al, 2013	nitrogen deposition	TB (total biomass)	Schima superba	AM	2.69388	1.10204	3.5102	1.30613	3	3
75	Guo et al, 2014	nitrogen deposition	TB (total biomass)	Acer truncatum	AM	9.39297	5.03564	15.4313	1.35585	3	3
76	Han et al, 2019	nitrogen deposition	TB (total biomass)	Pinus massoniana	ECM	45.6109	10.4977	24.2534	1.448	6	6
77	Kinney et al, 1997	nitrogen deposition	TB (total biomass)	Quercus rubra	ECM	3.0888	1.5132	4.6332	1.51322	6	6
78	Kinney et al, 1997	nitrogen deposition	TB (total biomass)	Acer saccharum	AM	4.32432	0.756598	4.6332	1.51322	6	6
79	Wang et al, 2014	nitrogen deposition	TB (total biomass)	Quercus chenii	ECM	13.84	1.39	10.02	1.54	5	5
80	Wang et al, 2014	nitrogen deposition	TB (total biomass)	Quercus variabilis	ECM	25.13	2.17	27.41	1.55	5	5
81	Zhang et al, 2013	nitrogen deposition	TB (total biomass)	Schima superba	AM	1.95918	0.76531	3.67347	1.62245	9	9
82	Wu et al, 2019	nitrogen deposition	TB (total biomass)	Pinus massoniana	ECM	42.7359	17.907	24.7646	1.6279	4	4
83	Wu et al, 2019	nitrogen deposition	TB (total biomass)	Pinus massoniana	ECM	153.173	35.814	11.4168	1.6279	4	4
84	Zhang et al, 2013	nitrogen deposition	TB (total biomass)	Schima superba	AM	2.69388	1.10204	4.10204	1.65306	3	3
85	LiB et al, 2018	nitrogen deposition	TB (total biomass)	Quercus acutissima	ECM	4	1.0222	4.68571	1.66109	5	5
86	Zhang et al, 2013	nitrogen deposition	TB (total biomass)	Schima superba	AM	2.69388	1.10204	3.71429	1.67347	3	3
87	Zhang et al, 2013	nitrogen deposition	TB (total biomass)	Schima superba	AM	2.05102	1.10204	3.27551	1.68367	9	9
88	Zhang et al, 2013	nitrogen deposition	TB (total biomass)	Schima superba	AM	1.95918	0.76531	3.18367	1.77551	9	9
89	Mo et al, 2008	nitrogen deposition	TB (total biomass)	Cryptocarya concinna	AM	4.59	1.2644	6.3	1.81865	3	3
90	Mo et al, 2008	nitrogen deposition	TB (total biomass)	Cryptocarya concinna	AM	4.59	1.2644	3.92	1.88794	3	3
91	Liu et al, 2017	nitrogen deposition	TB (total biomass)	Pinus massoniana	ECM	163.743	34.21	34.5029	1.9006	6	6
92	Wang et al, 2014	nitrogen deposition	TB (total biomass)	Quercus fabri	ECM	7.52	1.17	11.21	2.04	5	5
93	Wang et al, 2019	nitrogen deposition	TB (total biomass)	Cinnamomum burmanni	AM	17.7907	2.7907	20.2326	2.093	4	4
94	Wang et al, 2014	nitrogen deposition	TB (total biomass)	Quercus fabri	ECM	7.52	1.17	6.15	2.1	5	5
95	Wang et al, 2014	nitrogen deposition	TB (total biomass)	Quercus variabilis	ECM	25.13	2.17	19.99	2.1	5	5
96	Wang et al, 2014	nitrogen deposition	TB (total biomass)	Quercus acutissima	ECM	23.55	2.34	23.5	2.11	5	5
97	Zhang et al, 2013	nitrogen deposition	TB (total biomass)	Schima superba	AM	2.05102	1.10204	3.27551	2.11225	9	9
98	Mo et al, 2008	nitrogen deposition	TB (total biomass)	Cryptocarya concinna	AM	4.59	1.2644	6.51	2.1131	3	3
99	Luo et al, 2019	nitrogen deposition	TB (total biomass)	Populus cathayana	AM	7.28	0.881816	11.07	2.13106	6	6
100	Mo et al, 2008	nitrogen deposition	TB (total biomass)	Schima superba	AM	7.07	0.536936	6.66	2.14774	3	3
101	LiB et al, 2018	nitrogen deposition	TB (total biomass)	Quercus acutissima	ECM	4	1.0222	4.11429	2.17216	5	5
102	Watanabe et al, 2011	nitrogen deposition	TB (total biomass)	Larix gmelinii	ECM	55.2	15.7	69	2.2	3	3
103	Wang et al, 2014	nitrogen deposition	TB (total biomass)	Quercus glandulifera	ECM	5.34	1.02	10.67	2.21	5	5
104	Wang et al, 2014	nitrogen deposition	TB (total biomass)	Quercus variabilis	ECM	25.13	2.17	27.85	2.33	5	5
105	Zhang et al, 2013	nitrogen deposition	TB (total biomass)	Schima superba	AM	2.32653	0.91837	4.22449	2.35714	9	9
106	Mo et al, 2008	nitrogen deposition	TB (total biomass)	Schima superba	AM	7.07	0.536936	11.85	2.40755	3	3
107	Zhao et al, 2011	nitrogen deposition	TB (total biomass)	Populus cathayana	AM	9.88	0.693181	13.74	2.54912	5	5
108	Wang et al, 2014	nitrogen deposition	TB (total biomass)	Quercus chenii	ECM	13.84	1.39	14.84	2.57	5	5
109	Liu et al, 2015	nitrogen deposition	TB (total biomass)	Pinus massoniana	ECM	61.8557	16.7525	45.1031	2.5773	6	6
110	Liu et al, 2015	nitrogen deposition	TB (total biomass)	Schima superba	AM	70.8763	3.866	68.299	2.5773	6	6
111	Zhang et al, 2013	nitrogen deposition	TB (total biomass)	Schima superba	AM	2.32653	0.91837	5.29592	2.7551	9	9
112	LiB et al, 2018	nitrogen deposition	TB (total biomass)	Quercus acutissima	ECM	12.0571	1.5335	10.6286	2.81096	5	5
113	LiB et al, 2018	nitrogen deposition	TB (total biomass)	Quercus acutissima	ECM	12.0571	1.5335	10.5714	3.06677	5	5
114	Wang et al, 2016	nitrogen deposition	TB (total biomass)	Quercus glandulifera	ECM	29.19	7.48	64.79	3.11	7	7
115	Euring et al, 2012	nitrogen deposition	TB (total biomass)	Populus tremula	AM	28.47	6.61852	17.4	3.25269	8	8
116	Wu et al, 2019	nitrogen deposition	TB (total biomass)	Schima superba	AM	52.565	4.8838	49.1805	3.2558	4	4
117	Tanis et al, 2015	nitrogen deposition	TB (total biomass)	Fraxinus mandshurica	AM	14.09	4.63006	13.78	3.3601	7	7
118	LiA et al, 2017	nitrogen deposition	TB (total biomass)	Ailanthus altissima	AM	25.2778	6.87449	34.2708	3.43739	8	8
119	Mo et al, 2008	nitrogen deposition	TB (total biomass)	Cryptocarya concinna	AM	4.59	1.2644	9.62	3.53338	3	3
120	Wang et al, 2014	nitrogen deposition	TB (total biomass)	Quercus acutissima	ECM	23.55	2.34	33.67	3.59	5	5
121	Wang et al, 2014	nitrogen deposition	TB (total biomass)	Quercus acutissima	ECM	23.55	2.34	27.99	3.59	5	5
122	Euring et al, 2012	nitrogen deposition	TB (total biomass)	Populus trichocarpa	ECM	23.77	4.72347	19.31	3.5921	8	8
123	Luo et al, 2014	nitrogen deposition	TB (total biomass)	Quercusacutissima	ECM	17.6471	3.60197	12.5	3.60222	6	6
124	Zhang et al, 2013	nitrogen deposition	TB (total biomass)	Schima superba	AM	2.32653	0.91837	4.95918	3.61225	9	9
125	Thomas et al, 2000	nitrogen deposition	TB (total biomass)	Gliricidia sepium	AM	29	2.702	27.18	3.63731	3	3
126	Liu et al, 2017	nitrogen deposition	TB (total biomass)	Schima superba	AM	72.5146	3.8012	68.7135	3.8011	6	6
127	Xu et al, 2015	nitrogen deposition	TB (total biomass)	Quercus variabilis	ECM	20.7407	6.85937	20.7407	3.91968	7	7
128	Guo et al, 2014	nitrogen deposition	TB (total biomass)	Acer truncatum	AM	9.39297	5.03564	17.6677	4.06737	3	3
129	Wang et al, 2014	nitrogen deposition	TB (total biomass)	Quercus glandulifera	ECM	5.34	1.02	10.06	4.22	5	5
130	Wang et al, 2016	nitrogen deposition	TB (total biomass)	Quercus glandulifera	ECM	29.19	7.48	31.23	4.23	7	7
131	Han et al, 2019	nitrogen deposition	TB (total biomass)	Schima superba	AM	27.6923	6.5158	19.0045	4.6154	6	6
132	Liu et al, 2021	nitrogen deposition	TB (total biomass)	Cunninghamia lanceolata	AM	27.871	10.9639	29.9355	4.61636	5	5
133	Xu et al, 2015	nitrogen deposition	TB (total biomass)	Quercus variabilis	ECM	20.7407	6.85937	22.963	4.8994	7	7
134	Tanis et al, 2015	nitrogen deposition	TB (total biomass)	Fraxinus quadrangulata	AM	9.22	8.81035	11.27	5.34442	7	7
135	Liu et al, 2015	nitrogen deposition	TB (total biomass)	Ormosia pinnata	AM	229.744	16.153	281.795	5.384	6	6
136	Luo et al, 2014	nitrogen deposition	TB (total biomass)	Quercusacutissima	ECM	17.6471	3.60197	18.3824	5.40308	6	6
137	Xu et al, 2018	nitrogen deposition	TB (total biomass)	Dalbergia odorifera	AM	52.1978	4.1209	67.3077	5.4945	4	4
138	Eller et al, 2011	nitrogen deposition	TB (total biomass)	Acer saccharum	AM	43.8323	5.60059	33.0539	5.60059	3	3
139	Liu et al, 2017	nitrogen deposition	TB (total biomass)	Ormosia pinnata	AM	228.363	17.105	279.678	5.702	6	6
140	Wang et al, 2016	nitrogen deposition	TB (total biomass)	Quercus variabilis	ECM	63.69	5.88	75.04	5.79	7	7
141	Xu et al, 2015	nitrogen deposition	TB (total biomass)	Quercus mongolica	ECM	18.1481	5.87965	15.9259	5.87939	7	7
142	Thomas et al, 2000	nitrogen deposition	TB (total biomass)	Gliricidia sepium	AM	29	2.702	28.97	5.90629	3	3
143	Han et al, 2019	nitrogen deposition	TB (total biomass)	Pinus massoniana	ECM	45.6109	10.4977	22.4434	6.1539	6	6
144	Liu et al, 2015	nitrogen deposition	TB (total biomass)	Schima superba	AM	152.062	2.577	149.485	6.443	6	6
145	Wu et al, 2019	nitrogen deposition	TB (total biomass)	Ormosia pinnata	AM	222.189	17.907	277.474	6.511	4	4
146	Wu et al, 2019	nitrogen deposition	TB (total biomass)	Schima superba	AM	137.476	3.256	135.784	6.512	4	4
147	Han et al, 2019	nitrogen deposition	TB (total biomass)	Schima superba	AM	27.6923	6.5158	17.3756	6.5158	6	6
148	Xu et al, 2015	nitrogen deposition	TB (total biomass)	Quercus mongolica	ECM	18.1481	5.87965	19.2593	6.85937	7	7
149	LiA et al, 2017	nitrogen deposition	TB (total biomass)	Ailanthus altissima	AM	25.2778	6.87449	28.6806	6.87449	8	8
150	Wang et al, 2016	nitrogen deposition	TB (total biomass)	Quercus glandulifera	ECM	29.19	7.48	42.94	7.13	7	7
151	Luo et al, 2014	nitrogen deposition	TB (total biomass)	Quercusacutissima	ECM	17.6471	3.60197	16.1765	7.20419	6	6
152	Cui et al, 2019	nitrogen deposition	TB (total biomass)	Fraxinus mandshurica	AM	62.0207	12.5907	68.0829	7.9275	5	5
153	Eller et al, 2011	nitrogen deposition	TB (total biomass)	Tsuga canadensis	ECM	33.0539	8.71204	33.7725	8.08972	3	3
154	Wang et al, 2016	nitrogen deposition	TB (total biomass)	Quercus chenii	ECM	66.08	6.91	68.82	8.12	7	7
155	Wang et al, 2016	nitrogen deposition	TB (total biomass)	Quercus fabri	ECM	26.69	7.26	51.23	8.14	7	7
156	Xu et al, 2015	nitrogen deposition	TB (total biomass)	Quercus mongolica	ECM	18.1481	5.87965	21.1111	8.81908	7	7
157	Li et al, 2016	nitrogen deposition	TB (total biomass)	Larix kaempferi	ECM	119.48	3.15286	146.96	8.83247	5	5
158	Wang et al, 2016	nitrogen deposition	TB (total biomass)	Quercus fabri	ECM	26.69	7.26	42.61	8.85	7	7
159	WangB et al, 2018	nitrogen deposition	TB (total biomass)	Senna surattensis	AM	47.8873	10.3287	129.577	9.39	6	6
160	Liu et al, 2017	nitrogen deposition	TB (total biomass)	Schima superba	AM	72.5146	3.8012	110.526	9.503	6	6
161	Wantanabe et al, 2008	nitrogen deposition	TB (total biomass)	Quercus mongolica	ECM	36.9	4.75201	61.68	9.79796	6	6
162	Kinney et al, 1997	nitrogen deposition	TB (total biomass)	Populus tremuloides	AM	8.64865	0.756598	43.5521	9.83593	6	6
163	Uselman et al, 2002	nitrogen deposition	TB (total biomass)	Robinia pseudoacacia	ECM	7.38789	3.44128	23.5164	9.86501	3	3
164	Guo et al, 2014	nitrogen deposition	TB (total biomass)	Acer truncatum	AM	9.39297	5.03564	24.7125	10.0714	3	3
165	Liu et al, 2015	nitrogen deposition	TB (total biomass)	Schima superba	AM	70.8763	3.866	110.825	10.309	6	6
166	Liu et al, 2015	nitrogen deposition	TB (total biomass)	Pinus massoniana	ECM	166.237	33.505	63.1443	10.3093	6	6
167	Wang et al, 2016	nitrogen deposition	TB (total biomass)	Quercus chenii	ECM	66.08	6.91	74.77	10.47	7	7
168	Xu et al, 2015	nitrogen deposition	TB (total biomass)	Quercus variabilis	ECM	20.7407	6.85937	27.7778	10.7791	7	7
169	Xu et al, 2018	nitrogen deposition	TB (total biomass)	Dalbergia odorifera	AM	52.1978	4.1209	144.231	10.989	4	4
170	WangB et al, 2018	nitrogen deposition	TB (total biomass)	Senna surattensis	AM	47.8873	10.3287	49.7653	11.2676	6	6
171	Wu et al, 2019	nitrogen deposition	TB (total biomass)	Pinus massoniana	ECM	153.173	35.814	44.0393	11.3954	4	4
172	Wu et al, 2019	nitrogen deposition	TB (total biomass)	Schima superba	AM	52.565	4.8838	94.8263	11.3957	4	4
173	Liu et al, 2017	nitrogen deposition	TB (total biomass)	Pinus massoniana	ECM	163.743	34.21	63.0117	11.4035	6	6
174	Tanis et al, 2015	nitrogen deposition	TB (total biomass)	Fraxinus americana	AM	20.23	6.95833	26.75	11.9323	7	7
175	WangB et al, 2018	nitrogen deposition	TB (total biomass)	Sophora japonica	AM	29.108	4.6948	47.8873	12.2066	6	6
176	Cui et al, 2019	nitrogen deposition	TB (total biomass)	Pinus koraiensis	ECM	38.2383	15.2332	38.5492	12.4353	5	5
177	Liu et al, 2021	nitrogen deposition	TB (total biomass)	Phoebe chekiangensis	AM	36.5217	5.00007	50.3106	12.4996	5	5
178	WangB et al, 2018	nitrogen deposition	TB (total biomass)	Sophora japonica	AM	29.108	4.6948	61.9718	13.1456	6	6
179	Liu et al, 2017	nitrogen deposition	TB (total biomass)	Acacia mangium	AM	146.637	19.006	241.667	13.304	6	6
180	Wang et al, 2016	nitrogen deposition	TB (total biomass)	Quercus fabri	ECM	26.69	7.26	57.93	13.73	7	7
181	Wang et al, 2016	nitrogen deposition	TB (total biomass)	Quercus chenii	ECM	66.08	6.91	77.66	13.78	7	7
182	Liu et al, 2015	nitrogen deposition	TB (total biomass)	Acacia mangium	AM	145.385	19.743	240.513	14.359	6	6
183	Wu et al, 2019	nitrogen deposition	TB (total biomass)	Acacia mangium	AM	134.599	21.162	235.4	14.651	4	4
184	Wang et al, 2016	nitrogen deposition	TB (total biomass)	Quercus variabilis	ECM	63.69	5.88	121.44	14.68	7	7
185	Wang et al, 2001	nitrogen deposition	TB (total biomass)	Populus tremuloides	AM	58.6	6.02	82.4	14.98	4	4
186	WangB et al, 2018	nitrogen deposition	TB (total biomass)	Sophora japonica	AM	29.108	4.6948	55.3991	15.0234	6	6
187	Wang et al, 2016	nitrogen deposition	TB (total biomass)	Quercus variabilis	ECM	63.69	5.88	94.6	15.57	7	7
188	Liu et al, 2015	nitrogen deposition	TB (total biomass)	Acacia mangium	AM	145.385	19.743	208.205	16.154	6	6
189	Wu et al, 2019	nitrogen deposition	TB (total biomass)	Schima superba	AM	137.476	3.256	160.138	16.279	4	4
190	Wang et al, 2016	nitrogen deposition	TB (total biomass)	Quercus acutissima	ECM	93.46	11.07	111.48	16.39	7	7
191	Liu et al, 2015	nitrogen deposition	TB (total biomass)	Schima superba	AM	152.062	2.577	171.392	16.752	6	6
192	Cui et al, 2019	nitrogen deposition	TB (total biomass)	Fraxinus mandshurica	AM	62.0207	12.5907	65.285	16.7875	5	5
193	WangB et al, 2018	nitrogen deposition	TB (total biomass)	Sophora japonica	AM	29.108	4.6948	84.507	16.901	6	6
194	Liu et al, 2017	nitrogen deposition	TB (total biomass)	Acacia mangium	AM	146.637	19.006	207.456	17.105	6	6
195	Xu et al, 2018	nitrogen deposition	TB (total biomass)	Eucalyptus urophylla	ECM	332.24	17.487	424.044	17.486	4	4
196	Yan et al, 2013	nitrogen deposition	TB (total biomass)	Cyclobalanopsis glauca	AM	255.282	17.605	255.282	17.605	3	3
197	Cui et al, 2019	nitrogen deposition	TB (total biomass)	Pinus koraiensis	ECM	38.2383	15.2332	36.3731	17.7202	5	5
198	Wang et al, 2016	nitrogen deposition	TB (total biomass)	Quercus acutissima	ECM	93.46	11.07	139.69	17.79	7	7
199	Wang et al, 2016	nitrogen deposition	TB (total biomass)	Quercus acutissima	ECM	93.46	11.07	180.86	17.8	7	7
200	Liu et al, 2015	nitrogen deposition	TB (total biomass)	Ormosia pinnata	AM	224.359	39.487	208.205	17.949	6	6
201	WangB et al, 2018	nitrogen deposition	TB (total biomass)	Senna surattensis	AM	47.8873	10.3287	76.9953	18.7793	6	6
202	Wu et al, 2019	nitrogen deposition	TB (total biomass)	Acacia mangium	AM	134.599	21.162	199.651	19.534	4	4
203	Wu et al, 2019	nitrogen deposition	TB (total biomass)	Ormosia pinnata	AM	215.932	43.954	199.53	19.535	4	4
204	Wang et al, 2001	nitrogen deposition	TB (total biomass)	Populus tremuloides	AM	86.5	16.66	72.8	19.7	4	4
205	WangB et al, 2018	nitrogen deposition	TB (total biomass)	Robinia pseudoacacia	ECM	85.446	20.657	105.164	22.536	6	6
206	Wantanabe et al, 2008	nitrogen deposition	TB (total biomass)	Alnus hirsuta	ECM	67.89	14.256	69.01	23.1722	6	6
207	Luo et al, 2014	nitrogen deposition	TB (total biomass)	Robinia pseudoacacia	ECM	49.2647	18.0109	52.9412	23.4142	6	6
208	Luo et al, 2014	nitrogen deposition	TB (total biomass)	Robinia pseudoacacia	ECM	49.2647	18.0109	41.9118	25.2153	6	6
209	Liu et al, 2015	nitrogen deposition	TB (total biomass)	Ormosia pinnata	AM	141.795	10.769	227.949	26.923	6	6
210	Liu et al, 2015	nitrogen deposition	TB (total biomass)	Acacia mangium	AM	229.744	16.153	211.795	26.923	6	6
211	WangB et al, 2018	nitrogen deposition	TB (total biomass)	Robinia pseudoacacia	ECM	85.446	20.657	97.6526	27.2304	6	6
212	WangB et al, 2018	nitrogen deposition	TB (total biomass)	Robinia pseudoacacia	ECM	85.446	20.657	98.5915	27.2305	6	6
213	Vose et al, 1995	nitrogen deposition	TB (total biomass)	Pinus ponderosa	ECM	78.9	23.9023	114.5	28.4056	3	3
214	Liu et al, 2017	nitrogen deposition	TB (total biomass)	Ormosia pinnata	AM	228.363	17.105	209.357	28.508	6	6
215	Liu et al, 2015	nitrogen deposition	TB (total biomass)	Ormosia pinnata	AM	141.795	10.769	235.128	28.718	6	6
216	Liu et al, 2015	nitrogen deposition	TB (total biomass)	Acacia mangium	AM	224.359	39.487	211.795	28.718	6	6
217	Wu et al, 2019	nitrogen deposition	TB (total biomass)	Ormosia pinnata	AM	222.189	17.907	202.526	29.302	4	4
218	WangB et al, 2018	nitrogen deposition	TB (total biomass)	Robinia pseudoacacia	ECM	85.446	20.657	110.798	30.047	6	6
219	Luo et al, 2014	nitrogen deposition	TB (total biomass)	Robinia pseudoacacia	ECM	49.2647	18.0109	59.5588	30.6186	6	6
220	Wu et al, 2019	nitrogen deposition	TB (total biomass)	Ormosia pinnata	AM	128.347	13.023	229.213	30.93	4	4
221	Wu et al, 2019	nitrogen deposition	TB (total biomass)	Acacia mangium	AM	128.347	13.023	221.009	30.93	4	4
222	Wu et al, 2019	nitrogen deposition	TB (total biomass)	Acacia mangium	AM	215.932	43.954	201.217	30.93	4	4
223	WangB et al, 2018	nitrogen deposition	TB (total biomass)	Senna surattensis	AM	47.8873	10.3287	80.7512	33.8028	6	6
224	Liu et al, 2015	nitrogen deposition	TB (total biomass)	Pinus massoniana	ECM	61.8557	16.7525	140.464	45.103	6	6
225	Vose et al, 1995	nitrogen deposition	TB (total biomass)	Pinus ponderosa	ECM	78.9	23.9023	113.8	45.7261	3	3
226	Yan et al, 2013	nitrogen deposition	TB (total biomass)	Schima superba	AM	360.915	26.409	492.958	52.817	3	3
227	Spinnler et al, 2003	nitrogen deposition	TB (total biomass)	Picea abies	ECM	576.923	43.0018	596.154	57.335	5	5
228	Wu et al, 2019	nitrogen deposition	TB (total biomass)	Pinus massoniana	ECM	42.7359	17.907	125.63	58.605	4	4
229	Xu et al, 2018	nitrogen deposition	TB (total biomass)	Eucalyptus urophylla	ECM	332.24	17.487	625.137	61.202	4	4
230	Wu et al, 2011	nitrogen deposition	TB (total biomass)	Pinus massoniana	ECM	224.599	101.462	256.684	67.6443	10	10
231	Spinnler et al, 2003	nitrogen deposition	TB (total biomass)	Picea abies	ECM	448.718	186.338	448.718	86.0014	5	5
232	Spinnler et al, 2003	nitrogen deposition	TB (total biomass)	Picea abies	ECM	576.923	43.0018	576.923	100.337	5	5
233	Wu et al, 2011	nitrogen deposition	TB (total biomass)	Schima superba	AM	352.941	101.465	502.674	101.462	10	10
234	Wu et al, 2011	nitrogen deposition	TB (total biomass)	Cyclobalanopsis glauca	AM	256.684	101.465	256.684	101.465	10	10
235	Yan et al, 2013	nitrogen deposition	TB (total biomass)	Elaeocarpus glabripetalus	AM	1117.96	88.03	1496.48	114.44	3	3
236	Duan et al, 2009	nitrogen deposition	TB (total biomass)	Acmena acuminatissima	AM	167.398	39.499	261.442	118.495	3	3
237	Duan et al, 2009	nitrogen deposition	TB (total biomass)	Syzygium hancei	AM	199.686	84.905	317.61	119.497	3	3
238	Spinnler et al, 2003	nitrogen deposition	TB (total biomass)	Fagus sylvatica	AM	783.727	192.034	612.288	140.825	5	5
239	Yan et al, 2013	nitrogen deposition	TB (total biomass)	Liquidambar formosana	AM	1029.93	88.03	1602.11	140.85	3	3
240	Spinnler et al, 2003	nitrogen deposition	TB (total biomass)	Picea abies	ECM	583.333	86.0036	858.974	143.339	5	5
241	ZhangB et al, 2019	nitrogen deposition	TB (total biomass)	Liquidambar formosana	AM	784.884	130.814	872.093	145.347	5	5
242	Luo et al, 2020	nitrogen deposition	TB (total biomass)	Populus cathayana	AM	7.28	0.881816	10.05	2.13106	6	6
243	Spinnler et al, 2003	nitrogen deposition	TB (total biomass)	Picea abies	ECM	564.103	143.336	384.615	172.005	5	5
244	Spinnler et al, 2003	nitrogen deposition	TB (total biomass)	Picea abies	ECM	583.333	86.0036	576.923	172.005	5	5
245	Spinnler et al, 2003	nitrogen deposition	TB (total biomass)	Picea abies	ECM	500	143.339	711.538	172.007	5	5
246	ZhangB et al, 2019	nitrogen deposition	TB (total biomass)	Liquidambar formosana	AM	784.884	130.814	712.209	174.419	5	5
247	Spinnler et al, 2003	nitrogen deposition	TB (total biomass)	Picea abies	ECM	538.462	200.671	705.128	186.34	5	5
248	Spinnler et al, 2003	nitrogen deposition	TB (total biomass)	Picea abies	ECM	1198.72	243.664	1051.28	186.354	5	5
249	Spinnler et al, 2003	nitrogen deposition	TB (total biomass)	Fagus sylvatica	AM	531.104	307.327	665.809	204.835	5	5
250	Spinnler et al, 2003	nitrogen deposition	TB (total biomass)	Picea abies	ECM	564.103	143.336	512.821	215.005	5	5
251	Spinnler et al, 2003	nitrogen deposition	TB (total biomass)	Picea abies	ECM	448.718	186.338	724.359	215.007	5	5
252	Spinnler et al, 2003	nitrogen deposition	TB (total biomass)	Fagus sylvatica	AM	822.453	179.232	868.577	217.56	5	5
253	Spinnler et al, 2003	nitrogen deposition	TB (total biomass)	Fagus sylvatica	AM	822.453	179.232	1140.37	255.963	5	5
254	Spinnler et al, 2003	nitrogen deposition	TB (total biomass)	Fagus sylvatica	AM	987.778	307.173	1016.73	256.119	5	5
255	Spinnler et al, 2003	nitrogen deposition	TB (total biomass)	Picea abies	ECM	1198.72	243.664	1314.1	258.02	5	5
256	Duan et al, 2009	nitrogen deposition	TB (total biomass)	Ormosia pinnata	AM	817.61	149.371	770.44	267.3	3	3
257	Wu et al, 2011	nitrogen deposition	TB (total biomass)	Elaeocarpus glabripetalus	AM	1144.39	304.369	1540.11	270.564	10	10
258	Spinnler et al, 2003	nitrogen deposition	TB (total biomass)	Picea abies	ECM	1102.56	329.686	1205.13	272.331	5	5
259	Spinnler et al, 2003	nitrogen deposition	TB (total biomass)	Picea abies	ECM	1102.56	329.686	942.308	286.668	5	5
260	Spinnler et al, 2003	nitrogen deposition	TB (total biomass)	Fagus sylvatica	AM	531.104	307.327	411.193	307.251	5	5
261	ZhangB et al, 2019	nitrogen deposition	TB (total biomass)	Cyclobalanopsis glauca	AM	1468.02	203.49	1991.28	348.84	5	5
262	Duan et al, 2009	nitrogen deposition	TB (total biomass)	Castanopsis hystrix	ECM	1242.14	314.46	1509.43	377.36	3	3
263	Spinnler et al, 2003	nitrogen deposition	TB (total biomass)	Picea abies	ECM	500	143.339	923.077	401.336	5	5
264	Spinnler et al, 2003	nitrogen deposition	TB (total biomass)	Picea abies	ECM	538.462	200.671	1102.56	401.352	5	5
265	Spinnler et al, 2003	nitrogen deposition	TB (total biomass)	Fagus sylvatica	AM	783.727	192.034	752.364	422.474	5	5
266	Duan et al, 2009	nitrogen deposition	TB (total biomass)	Schima superba	AM	666.667	276.729	1339.62	427.68	3	3
267	Wu et al, 2011	nitrogen deposition	TB (total biomass)	Liquidambar formosana	AM	1037.43	236.76	1593.58	439.683	10	10
268	Spinnler et al, 2003	nitrogen deposition	TB (total biomass)	Fagus sylvatica	AM	987.778	307.173	1208.4	524.895	5	5
269	ZhangB et al, 2019	nitrogen deposition	TB (total biomass)	Cyclobalanopsis glauca	AM	1468.02	203.49	1656.98	566.86	5	5
270	Liu et al, 2018	nitrogen deposition	AGB (aboveground biomass)	Pinus tabuliformis	ECM	0.570625	0.059702	0.352104	0.01194	6	6
271	Liu et al, 2018	nitrogen deposition	AGB (aboveground biomass)	Pinus tabuliformis	ECM	0.570625	0.059702	0.681542	0.011941	6	6
272	Liu et al, 2018	nitrogen deposition	AGB (aboveground biomass)	Pinus tabuliformis	ECM	0.570625	0.059702	0.575032	0.026866	6	6
273	Yan et al, 2014	nitrogen deposition	AGB (aboveground biomass)	Syzygium hancei	AM	0.0927835	0.0618555	0.113402	0.030927	3	3
274	Liu et al, 2018	nitrogen deposition	AGB (aboveground biomass)	Pinus tabuliformis	ECM	0.570625	0.059702	0.491926	0.050746	6	6
275	Liu et al, 2018	nitrogen deposition	AGB (aboveground biomass)	Pinus tabuliformis	ECM	0.570625	0.059702	0.774563	0.068657	6	6
276	Yan et al, 2014	nitrogen deposition	AGB (aboveground biomass)	Acmena acuminatissima	AM	0.113402	0.030927	0.247423	0.092784	3	3
277	Yan et al, 2014	nitrogen deposition	AGB (aboveground biomass)	Castanopsis hystrix	ECM	0.525773	0.185568	0.721649	0.123714	3	3
278	Yan et al, 2014	nitrogen deposition	AGB (aboveground biomass)	Ormosia pinnata	AM	0.608247	0.092784	0.680412	0.216495	3	3
279	McWhirter et al, 2015	nitrogen deposition	AGB (aboveground biomass)	Malus coronaria	ECM	0.216204	0.59603	0.373618	0.39735	5	5
280	Yan et al, 2014	nitrogen deposition	AGB (aboveground biomass)	Schima superba	AM	0.793814	0.123714	1.59794	0.46392	3	3
281	McWhirter et al, 2015	nitrogen deposition	AGB (aboveground biomass)	Rhus typhina	ECM	1.63672	3.1788	5.60871	0.7947	5	5
282	McWhirter et al, 2015	nitrogen deposition	AGB (aboveground biomass)	Elaeagnus umbellata	AM	0.514242	0.39735	1.18821	0.9934	5	5
283	Han et al, 2019	nitrogen deposition	AGB (aboveground biomass)	Pinus massoniana	ECM	38.1818	8.1818	19.7727	1.1364	6	6
284	Li et al, 2016	nitrogen deposition	AGB (aboveground biomass)	Larix olgensis	ECM	28.73	1.15	53.43	1.3	5	5
285	McWhirter et al, 2015	nitrogen deposition	AGB (aboveground biomass)	Fraxinus americana	AM	0.861912	1.58939	1.8935	1.78805	5	5
286	Egli et al, 1998	nitrogen deposition	AGB (aboveground biomass)	Picea abies	ECM	17.12	1.9	23.14	2	4	4
287	Han et al, 2019	nitrogen deposition	AGB (aboveground biomass)	Schima superba	AM	22.3636	5.6364	8	2.7273	6	6
288	Han et al, 2019	nitrogen deposition	AGB (aboveground biomass)	Schima superba	AM	22.3636	5.6364	15.8182	3.6363	6	6
289	WangA et al, 2016	nitrogen deposition	AGB (aboveground biomass)	Fraxinus mandshurica	AM	22.8	3.3	88.8	4.1	5	5
290	Han et al, 2019	nitrogen deposition	AGB (aboveground biomass)	Pinus massoniana	ECM	38.1818	8.1818	18.6364	5	6	6
291	Rasheed et al, 2020	nitrogen deposition	AGB (aboveground biomass)	Pinus sylvestris	ECM	26.19	3.22	51	5.7	4	4
292	Tariq et al, 2019	nitrogen deposition	AGB (aboveground biomass)	Phoebe zhennan	AM	15.2	5.85	15.29	5.95	5	5
293	WangA et al, 2016	nitrogen deposition	AGB (aboveground biomass)	Fraxinus mandshurica	AM	22.8	3.3	53.2	6.4	5	5
294	Tanis et al, 2015	nitrogen deposition	AGB (aboveground biomass)	Fraxinus mandshurica	AM	7.29	7.14	6.6	7.91	7	7
295	Tanis et al, 2015	nitrogen deposition	AGB (aboveground biomass)	Fraxinus quadrangulata	AM	4.21	12.46	5.18	8.82	7	7
296	WangA et al, 2016	nitrogen deposition	AGB (aboveground biomass)	Fraxinus mandshurica	AM	22.8	3.3	84	10.3	5	5
297	Tanis et al, 2015	nitrogen deposition	AGB (aboveground biomass)	Fraxinus americana	AM	9.9	22.68	14.61	11.76	7	7
298	WangA et al, 2016	nitrogen deposition	AGB (aboveground biomass)	Fraxinus mandshurica	AM	22.8	3.3	63.9	14.5	5	5
299	Li et al, 2016	nitrogen deposition	AGB (aboveground biomass)	Larix kaempferi	ECM	83.3	9.55	102.73	15.2	5	5
300	WangA et al, 2016	nitrogen deposition	AGB (aboveground biomass)	Fraxinus mandshurica	AM	22.8	3.3	58.3	16.4	5	5
301	WangA et al, 2016	nitrogen deposition	AGB (aboveground biomass)	Fraxinus mandshurica	AM	22.8	3.3	109	17.4	5	5
302	Walker et al, 1998	nitrogen deposition	AGB (aboveground biomass)	Pinus ponderosa	ECM	169.87	85.4	199.52	92.5	5	5
303	Walker et al, 1998	nitrogen deposition	AGB (aboveground biomass)	Pinus ponderosa	ECM	169.87	85.4	197.87	155.1	5	5
304	Huang et al, 2015	nitrogen deposition	AGB (aboveground biomass)	Syzygium hancei	AM	511.792	297.171	412.736	247.641	3	3
305	Wu et al, 2011	nitrogen deposition	AGB (aboveground biomass)	Pinus massoniana	ECM	180	171.43	205.714	257.15	10	10
306	Wu et al, 2011	nitrogen deposition	AGB (aboveground biomass)	Cyclobalanopsis glauca	AM	188.571	257.15	205.714	257.15	10	10
307	Huang et al, 2015	nitrogen deposition	AGB (aboveground biomass)	Castanopsis hystrix	ECM	1040.09	445.77	1106.13	297.18	3	3
308	Wu et al, 2011	nitrogen deposition	AGB (aboveground biomass)	Schima superba	AM	274.286	342.85	402.857	342.86	10	10
309	Huang et al, 2015	nitrogen deposition	AGB (aboveground biomass)	Acmena acuminatissima	AM	528.302	247.641	544.811	346.698	3	3
310	Wu et al, 2011	nitrogen deposition	AGB (aboveground biomass)	Elaeocarpus glabripetalus	AM	762.857	685.72	1097.14	771.5	10	10
311	Huang et al, 2015	nitrogen deposition	AGB (aboveground biomass)	Ormosia pinnata	AM	974.057	247.629	1370.28	891.51	3	3
312	Wu et al, 2011	nitrogen deposition	AGB (aboveground biomass)	Liquidambar formosana	AM	711.429	600	1191.43	942.8	10	10
313	Huang et al, 2015	nitrogen deposition	AGB (aboveground biomass)	Schima superba	AM	1403.3	1238.22	2030.66	1287.75	3	3
314	McWhirter et al, 2015	nitrogen deposition	RB (root biomass)	Malus coronaria	ECM	0.136364	0.101638	0.136364	0.0508191	5	5
315	McWhirter et al, 2015	nitrogen deposition	RB (root biomass)	Elaeagnus umbellata	AM	0.181818	0.10164	0.363636	0.15246	5	5
316	Liu et al, 2018	nitrogen deposition	RB (root biomass)	Pinus tabuliformis	ECM	0.219701	0.009553	0.210149	0.009552	6	6
317	Liu et al, 2018	nitrogen deposition	RB (root biomass)	Pinus tabuliformis	ECM	0.219701	0.009553	0.272239	0.019104	6	6
318	Liu et al, 2018	nitrogen deposition	RB (root biomass)	Pinus tabuliformis	ECM	0.219701	0.009553	0.241194	0.019105	6	6
319	Khurana et al, 2004	nitrogen deposition	RB (root biomass)	Terminalia chebula	ECM	0.254777	0.127389	0.127389	0.127388	5	5
320	Khurana et al, 2004	nitrogen deposition	RB (root biomass)	Acacia nilotica	AM	0.254777	0.127389	0.382166	0.127388	5	5
321	Khurana et al, 2004	nitrogen deposition	RB (root biomass)	Terminalia chebula	ECM	0.254777	0.127389	0.254777	0.127389	5	5
322	Khurana et al, 2004	nitrogen deposition	RB (root biomass)	Terminalia chebula	ECM	0.254777	0.127389	0.254777	0.127389	5	5
323	Khurana et al, 2004	nitrogen deposition	RB (root biomass)	Acacia nilotica	AM	0.254777	0.127389	0.254777	0.127389	5	5
324	Khurana et al, 2004	nitrogen deposition	RB (root biomass)	Acacia nilotica	AM	0.254777	0.127389	0.254777	0.127389	5	5
325	Khurana et al, 2004	nitrogen deposition	RB (root biomass)	Acacia nilotica	AM	0.382166	0.127388	0.382166	0.127388	5	5
326	Khurana et al, 2004	nitrogen deposition	RB (root biomass)	Acacia nilotica	AM	0.382166	0.127388	0.509554	0.127389	5	5
327	Khurana et al, 2004	nitrogen deposition	RB (root biomass)	Phyllanthus emblica	AM	0.382166	0.127388	0.509554	0.127389	5	5
328	Khurana et al, 2004	nitrogen deposition	RB (root biomass)	Phyllanthus emblica	AM	0.509554	0.127389	0.764331	0.127389	5	5
329	Khurana et al, 2004	nitrogen deposition	RB (root biomass)	Albizia procera	AM	0.509554	0.127389	0.89172	0.12739	5	5
330	Khurana et al, 2004	nitrogen deposition	RB (root biomass)	Phyllanthus emblica	AM	0.509554	0.127389	1.1465	0.12739	5	5
331	McWhirter et al, 2015	nitrogen deposition	RB (root biomass)	Fraxinus americana	AM	0.545455	0.406557	0.681818	0.304919	5	5
332	Khurana et al, 2004	nitrogen deposition	RB (root biomass)	Terminalia chebula	ECM	0.636943	0.127388	0.636943	0.127388	5	5
333	Khurana et al, 2004	nitrogen deposition	RB (root biomass)	Terminalia chebula	ECM	0.636943	0.127388	0.764331	0.127389	5	5
334	Khurana et al, 2004	nitrogen deposition	RB (root biomass)	Terminalia chebula	ECM	0.636943	0.127388	0.89172	0.12739	5	5
335	Khurana et al, 2004	nitrogen deposition	RB (root biomass)	Phyllanthus emblica	AM	0.636943	0.127388	1.1465	0.12739	5	5
336	Khurana et al, 2004	nitrogen deposition	RB (root biomass)	Phyllanthus emblica	AM	0.636943	0.127388	1.1465	0.12739	5	5
337	Khurana et al, 2004	nitrogen deposition	RB (root biomass)	Albizia procera	AM	0.636943	0.127388	0.89172	0.12739	5	5
338	Wang et al, 2017	nitrogen deposition	RB (root biomass)	Symplocos tetagona	AM	0.705882	0.035294	0.776471	0.070588	6	6
339	Wang et al, 2017	nitrogen deposition	RB (root biomass)	Symplocos tetagona	AM	0.705882	0.035294	0.882353	0.070588	6	6
340	Wang et al, 2017	nitrogen deposition	RB (root biomass)	Symplocos tetagona	AM	0.705882	0.035294	0.811765	0.070588	6	6
341	Wang et al, 2017	nitrogen deposition	RB (root biomass)	Symplocos tetagona	AM	0.705882	0.035294	0.917647	0.070588	6	6
342	Khurana et al, 2004	nitrogen deposition	RB (root biomass)	Albizia procera	AM	0.764331	0.127389	0.764331	0.127389	5	5
343	Khurana et al, 2004	nitrogen deposition	RB (root biomass)	Albizia procera	AM	0.764331	0.127389	1.40127	0.12739	5	5
344	Khurana et al, 2004	nitrogen deposition	RB (root biomass)	Phyllanthus emblica	AM	0.764331	0.127389	1.40127	0.12739	5	5
345	Zhang et al, 2013	nitrogen deposition	RB (root biomass)	Schima superba	AM	0.777778	0.246912	1.16049	0.32099	9	9
346	Zhang et al, 2013	nitrogen deposition	RB (root biomass)	Schima superba	AM	0.777778	0.246912	1.14815	0.66666	9	9
347	Zhang et al, 2013	nitrogen deposition	RB (root biomass)	Schima superba	AM	0.777778	0.246912	1.34568	0.67901	9	9
348	Zhang et al, 2013	nitrogen deposition	RB (root biomass)	Schima superba	AM	0.864198	0.358022	1.90123	1.08642	9	9
349	Zhang et al, 2013	nitrogen deposition	RB (root biomass)	Schima superba	AM	0.864198	0.358022	1.74074	1.18519	9	9
350	Zhang et al, 2013	nitrogen deposition	RB (root biomass)	Schima superba	AM	0.864198	0.358022	1.96296	1.65432	9	9
351	Zhang et al, 2013	nitrogen deposition	RB (root biomass)	Schima superba	AM	0.901235	0.543205	0.975309	0.407411	9	9
352	Zhang et al, 2013	nitrogen deposition	RB (root biomass)	Schima superba	AM	0.901235	0.543205	1.30864	0.67901	9	9
353	Zhang et al, 2013	nitrogen deposition	RB (root biomass)	Schima superba	AM	0.901235	0.543205	1.35802	0.95062	9	9
354	Zhang et al, 2013	nitrogen deposition	RB (root biomass)	Schima superba	AM	1.06204	0.56935	1.4562	0.63504	3	3
355	Zhang et al, 2013	nitrogen deposition	RB (root biomass)	Schima superba	AM	1.06204	0.56935	1.63139	0.71168	3	3
356	Zhang et al, 2013	nitrogen deposition	RB (root biomass)	Schima superba	AM	1.06204	0.56935	1.48905	0.71168	3	3
357	Luo et al, 2019	nitrogen deposition	RB (root biomass)	Populus cathayana	AM	1.28	0.171464	0.9	0.0244949	6	6
358	Luo et al, 2020	nitrogen deposition	RB (root biomass)	Populus cathayana	AM	1.28	0.171464	0.73	0.195959	6	6
359	McWhirter et al, 2015	nitrogen deposition	RB (root biomass)	Rhus typhina	ECM	1.29545	1.0164	3.11364	0.965557	5	5
360	Hatenschwiler et al, 1997	nitrogen deposition	RB (root biomass)	Picea abies	ECM	1.31	0.069282	1.5	0.034641	3	3
361	Hatenschwiler et al, 1997	nitrogen deposition	RB (root biomass)	Picea abies	ECM	1.31	0.069282	1.47	0.0866025	3	3
362	Mo et al, 2008	nitrogen deposition	RB (root biomass)	Cryptocarya concinna	AM	1.35	0.155885	1.76	0.34641	3	3
363	Mo et al, 2008	nitrogen deposition	RB (root biomass)	Schima superba	AM	1.35	0.155885	1	0.381051	3	3
364	Mo et al, 2008	nitrogen deposition	RB (root biomass)	Cryptocarya concinna	AM	1.35	0.155885	1.5	0.415692	3	3
365	Mo et al, 2008	nitrogen deposition	RB (root biomass)	Cryptocarya concinna	AM	1.35	0.155885	2.07	0.935307	3	3
366	Khurana et al, 2004	nitrogen deposition	RB (root biomass)	Albizia procera	AM	1.40127	0.12739	1.27389	0.12738	5	5
367	Khurana et al, 2004	nitrogen deposition	RB (root biomass)	Phyllanthus emblica	AM	1.40127	0.12739	1.52866	0.12739	5	5
368	Khurana et al, 2004	nitrogen deposition	RB (root biomass)	Phyllanthus emblica	AM	1.40127	0.12739	1.1465	0.12739	5	5
369	Atwell et al, 2009	nitrogen deposition	RB (root biomass)	Eucalyptus pauciflora	ECM	1.54	0.363731	1.49	0.606218	3	3
370	Wang et al, 2017	nitrogen deposition	RB (root biomass)	Semiliquidambar cathayensis	AM	2.25882	0.07059	3.35294	0.07059	6	6
371	Wang et al, 2017	nitrogen deposition	RB (root biomass)	Semiliquidambar cathayensis	AM	2.25882	0.07059	3.10588	0.07059	6	6
372	Wang et al, 2017	nitrogen deposition	RB (root biomass)	Semiliquidambar cathayensis	AM	2.25882	0.07059	4.23529	0.17647	6	6
373	Wang et al, 2017	nitrogen deposition	RB (root biomass)	Semiliquidambar cathayensis	AM	2.25882	0.07059	4.30588	0.17647	6	6
374	Mo et al, 2008	nitrogen deposition	RB (root biomass)	Schima superba	AM	2.38	0.484974	1.18	0.0519615	3	3
375	Mo et al, 2008	nitrogen deposition	RB (root biomass)	Cryptocarya concinna	AM	2.38	0.484974	1.38	0.381051	3	3
376	Mo et al, 2008	nitrogen deposition	RB (root biomass)	Schima superba	AM	2.38	0.484974	3.47	0.519615	3	3
377	Mo et al, 2008	nitrogen deposition	RB (root biomass)	Schima superba	AM	2.38	0.484974	1.55	0.536936	3	3
378	Zhao et al, 2011	nitrogen deposition	RB (root biomass)	Populus cathayana	AM	2.59	0.737902	3.35	0.693181	5	5
379	Zhao et al, 2011	nitrogen deposition	RB (root biomass)	Populus cathayana	AM	2.64	0.64846	2.78	1.00623	5	5
380	Wang et al, 2017	nitrogen deposition	RB (root biomass)	Tsoongiodendrn odorum	AM	3.14118	0.07058	3.95294	0.14118	6	6
381	Wang et al, 2017	nitrogen deposition	RB (root biomass)	Tsoongiodendrn odorum	AM	3.14118	0.07058	4.34118	0.21176	6	6
382	Wang et al, 2017	nitrogen deposition	RB (root biomass)	Tsoongiodendrn odorum	AM	3.14118	0.07058	4.02353	0.24706	6	6
383	Wang et al, 2017	nitrogen deposition	RB (root biomass)	Tsoongiodendrn odorum	AM	3.14118	0.07058	3.63529	0.38824	6	6
384	Wang et al, 2014	nitrogen deposition	RB (root biomass)	Quercus glandulifera	ECM	3.22	0.45	4.01	0.87	5	5
385	Wang et al, 2014	nitrogen deposition	RB (root biomass)	Quercus glandulifera	ECM	3.22	0.45	5.5	1.04	5	5
386	Wang et al, 2014	nitrogen deposition	RB (root biomass)	Quercus glandulifera	ECM	3.22	0.45	5.8	1.28	5	5
387	Atwell et al, 2009	nitrogen deposition	RB (root biomass)	Eucalyptus pauciflora	ECM	4.26	1.24708	3.01	1.40296	3	3
388	Tanis et al, 2015	nitrogen deposition	RB (root biomass)	Fraxinus americana	AM	4.67	1.37579	5.92	2.1166	7	7
389	Wang et al, 2014	nitrogen deposition	RB (root biomass)	Quercus fabri	ECM	4.83	0.71	7.79	0.65	5	5
390	Wang et al, 2014	nitrogen deposition	RB (root biomass)	Quercus fabri	ECM	4.83	0.71	7.12	1.34	5	5
391	Wang et al, 2014	nitrogen deposition	RB (root biomass)	Quercus fabri	ECM	4.83	0.71	4.42	1.39	5	5
392	Zhang et al, 2019	nitrogen deposition	RB (root biomass)	Pinus massoniana	ECM	5.05	0.294449	5.6	1.10851	3	3
393	Han et al, 2019	nitrogen deposition	RB (root biomass)	Schima superba	AM	5.37557	1.14027	3.25792	1.05882	6	6
394	Han et al, 2019	nitrogen deposition	RB (root biomass)	Schima superba	AM	5.37557	1.14027	9.28507	4.07243	6	6
395	Tariq et al, 2019	nitrogen deposition	RB (root biomass)	Phoebe zhennan	AM	6.01	0.402492	6.7	0.469574	5	5
396	Fusaro et al, 2017	nitrogen deposition	RB (root biomass)	Quercus ilex	ECM	6.41	1.01	8.19	1.48	5	5
397	Han et al, 2019	nitrogen deposition	RB (root biomass)	Pinus massoniana	ECM	7.54751	2.06335	4.34389	0.43439	6	6
398	Han et al, 2019	nitrogen deposition	RB (root biomass)	Pinus massoniana	ECM	7.54751	2.06335	3.9095	0.92308	6	6
399	Liberloo et al, 2006	nitrogen deposition	RB (root biomass)	Populus euramericana	ECM	8.23952	1.1734	9.1018	1.1734	6	6
400	Wang et al, 2014	nitrogen deposition	RB (root biomass)	Quercus chenii	ECM	8.25	0.92	6.62	0.37	5	5
401	Wang et al, 2014	nitrogen deposition	RB (root biomass)	Quercus chenii	ECM	8.25	0.92	5.6	0.84	5	5
402	Wang et al, 2014	nitrogen deposition	RB (root biomass)	Quercus chenii	ECM	8.25	0.92	7.6	1.26	5	5
403	Khurana et al, 2004	nitrogen deposition	RB (root biomass)	Terminalia arjuna	AM	8.66242	0.76433	13.5032	0.2548	5	5
404	Khurana et al, 2004	nitrogen deposition	RB (root biomass)	Terminalia arjuna	AM	8.66242	0.76433	11.465	0.5095	5	5
405	Khurana et al, 2004	nitrogen deposition	RB (root biomass)	Terminalia arjuna	AM	8.66242	0.76433	12.6115	0.5095	5	5
406	Rasheed et al, 2020	nitrogen deposition	RB (root biomass)	Pinus sylvestris	ECM	9.11	4	21.7	7.06	4	4
407	Liberloo et al, 2006	nitrogen deposition	RB (root biomass)	Populus alba	ECM	9.2766	1.45926	8	2.29314	6	6
408	Liberloo et al, 2006	nitrogen deposition	RB (root biomass)	Populus nigra	AM	9.56098	1.25468	8.10976	1.46372	6	6
409	Eller et al, 2011	nitrogen deposition	RB (root biomass)	Tsuga canadensis	ECM	9.73054	3.11139	10.479	2.59288	3	3
410	LiA et al, 2017	nitrogen deposition	RB (root biomass)	Ailanthus altissima	AM	12.6923	4.35154	17.5641	2.53823	8	8
411	LiA et al, 2017	nitrogen deposition	RB (root biomass)	Ailanthus altissima	AM	12.6923	4.35154	13.4615	3.26372	8	8
412	Wang et al, 2016	nitrogen deposition	RB (root biomass)	Quercus glandulifera	ECM	12.82	4.68	14.98	2.78	7	7
413	Wang et al, 2016	nitrogen deposition	RB (root biomass)	Quercus glandulifera	ECM	12.82	4.68	33.78	2.9	7	7
414	Wang et al, 2016	nitrogen deposition	RB (root biomass)	Quercus glandulifera	ECM	12.82	4.68	22.68	3.58	7	7
415	Khurana et al, 2004	nitrogen deposition	RB (root biomass)	Terminalia arjuna	AM	13.2484	0.1274	17.8344	0.1274	5	5
416	Khurana et al, 2004	nitrogen deposition	RB (root biomass)	Terminalia arjuna	AM	13.2484	0.1274	18.5987	0.1274	5	5
417	Khurana et al, 2004	nitrogen deposition	RB (root biomass)	Terminalia arjuna	AM	13.2484	0.1274	15.5414	0.1274	5	5
418	Wang et al, 2014	nitrogen deposition	RB (root biomass)	Quercus acutissima	ECM	13.92	1.39	12.42	0.65	5	5
419	Wang et al, 2014	nitrogen deposition	RB (root biomass)	Quercus acutissima	ECM	13.92	1.39	17.6	1.41	5	5
420	Wang et al, 2014	nitrogen deposition	RB (root biomass)	Quercus acutissima	ECM	13.92	1.39	15.2	2.3	5	5
421	Thomas et al, 2000	nitrogen deposition	RB (root biomass)	Gliricidia sepium	AM	14.25	1.4376	13.51	2.54611	3	3
422	Thomas et al, 2000	nitrogen deposition	RB (root biomass)	Gliricidia sepium	AM	14.25	1.4376	14.55	3.32554	3	3
423	Cui et al, 2019	nitrogen deposition	RB (root biomass)	Pinus koraiensis	ECM	15.0518	6.7099	11.6062	3.0829	5	5
424	Cui et al, 2019	nitrogen deposition	RB (root biomass)	Pinus koraiensis	ECM	15.0518	6.7099	11.4249	5.9844	5	5
425	Wang et al, 2014	nitrogen deposition	RB (root biomass)	Quercus variabilis	ECM	16.91	1.57	17.2	0.85	5	5
426	Wang et al, 2014	nitrogen deposition	RB (root biomass)	Quercus variabilis	ECM	16.91	1.57	11.25	1.116	5	5
427	Wang et al, 2014	nitrogen deposition	RB (root biomass)	Quercus variabilis	ECM	16.91	1.57	18.51	1.34	5	5
428	Li et al, 2016	nitrogen deposition	RB (root biomass)	Larix olgensis	ECM	17.36	1.72177	27.09	1.02859	5	5
429	Wang et al, 2016	nitrogen deposition	RB (root biomass)	Quercus fabri	ECM	17.62	5.56	22.79	4.33	7	7
430	Wang et al, 2016	nitrogen deposition	RB (root biomass)	Quercus fabri	ECM	17.62	5.56	31.88	4.74	7	7
431	Wang et al, 2016	nitrogen deposition	RB (root biomass)	Quercus fabri	ECM	17.62	5.56	27.53	8.03	7	7
432	Fusaro et al, 2017	nitrogen deposition	RB (root biomass)	Fraxinus ornus	AM	22.25	3.35	25.96	4.87	5	5
433	Eller et al, 2011	nitrogen deposition	RB (root biomass)	Acer saccharum	AM	23.0539	3.37074	15.4192	3.37074	3	3
434	Xu et al, 2018	nitrogen deposition	RB (root biomass)	Dalbergia odorifera	AM	23.3516	2.7473	60.4396	5.4945	4	4
435	Xu et al, 2018	nitrogen deposition	RB (root biomass)	Dalbergia odorifera	AM	23.3516	2.7473	26.0989	6.8681	4	4
436	Watanabe et al, 2011	nitrogen deposition	RB (root biomass)	Larix gmelinii	ECM	25.9	8.9	29.8	1.8	3	3
437	Cui et al, 2019	nitrogen deposition	RB (root biomass)	Fraxinus mandshurica	AM	29.7656	4.2188	33.75	3.5156	5	5
438	Cui et al, 2019	nitrogen deposition	RB (root biomass)	Fraxinus mandshurica	AM	29.7656	4.2188	30.7031	6.5625	5	5
439	Wang et al, 2016	nitrogen deposition	RB (root biomass)	Quercus chenii	ECM	30.69	1.65	29.94	3.23	7	7
440	Wang et al, 2016	nitrogen deposition	RB (root biomass)	Quercus chenii	ECM	30.69	1.65	35.33	3.39	7	7
441	Wang et al, 2016	nitrogen deposition	RB (root biomass)	Quercus chenii	ECM	30.69	1.65	30.82	3.79	7	7
442	WangA et al, 2018	nitrogen deposition	RB (root biomass)	Fraxinus mandshurica	AM	31.2155	2.7624	34.2541	2.4862	6	6
443	WangA et al, 2018	nitrogen deposition	RB (root biomass)	Fraxinus mandshurica	AM	31.2155	2.7624	36.1878	3.0387	6	6
444	WangA et al, 2018	nitrogen deposition	RB (root biomass)	Fraxinus mandshurica	AM	31.2155	2.7624	39.779	3.3149	6	6
445	WangA et al, 2018	nitrogen deposition	RB (root biomass)	Fraxinus mandshurica	AM	31.2155	2.7624	27.0718	3.8674	6	6
446	WangA et al, 2018	nitrogen deposition	RB (root biomass)	Fraxinus mandshurica	AM	31.2155	2.7624	37.2928	4.4199	6	6
447	WangA et al, 2018	nitrogen deposition	RB (root biomass)	Fraxinus mandshurica	AM	31.2155	2.7624	37.2928	5.8011	6	6
448	Li et al, 2016	nitrogen deposition	RB (root biomass)	Larix kaempferi	ECM	36.19	5.88086	44.23	2.19135	5	5
449	Wu et al, 2011	nitrogen deposition	RB (root biomass)	Pinus massoniana	ECM	36.3636	19.1653	36.3636	9.58265	10	10
450	Hao et al, 2020	nitrogen deposition	RB (root biomass)	Pinus koraiensis	ECM	39.15	8.62	35.5	2.92	4	4
451	Hao et al, 2020	nitrogen deposition	RB (root biomass)	Larix olgensis	ECM	39.15	8.62	25.87	3.06	4	4
452	Hao et al, 2020	nitrogen deposition	RB (root biomass)	Betula platyphylla	ECM	39.15	8.62	45.76	3.86	4	4
453	Wang et al, 2016	nitrogen deposition	RB (root biomass)	Quercus variabilis	ECM	40.85	5.42	48.7	2.03	7	7
454	Wang et al, 2016	nitrogen deposition	RB (root biomass)	Quercus variabilis	ECM	40.85	5.42	60.65	5.71	7	7
455	Wang et al, 2016	nitrogen deposition	RB (root biomass)	Quercus variabilis	ECM	40.85	5.42	55.26	10.01	7	7
456	Wu et al, 2011	nitrogen deposition	RB (root biomass)	Cyclobalanopsis glauca	AM	48.4848	9.58297	42.4242	9.58265	10	10
457	Wang et al, 2016	nitrogen deposition	RB (root biomass)	Quercus acutissima	ECM	50.01	5.6	54.08	6.75	7	7
458	Wang et al, 2016	nitrogen deposition	RB (root biomass)	Quercus acutissima	ECM	50.01	5.6	80.66	6.88	7	7
459	Wang et al, 2016	nitrogen deposition	RB (root biomass)	Quercus acutissima	ECM	50.01	5.6	70.19	9.75	7	7
460	Hao et al, 2020	nitrogen deposition	RB (root biomass)	Larix olgensis	ECM	50.79	6.78	34.96	3.62	4	4
461	Hao et al, 2020	nitrogen deposition	RB (root biomass)	Pinus koraiensis	ECM	50.79	6.78	34.54	6.78	4	4
462	Hao et al, 2020	nitrogen deposition	RB (root biomass)	Fraxinus mandschurica	AM	50.79	6.78	53.1	7.34	4	4
463	Wu et al, 2011	nitrogen deposition	RB (root biomass)	Schima superba	AM	72.7273	28.7479	84.8485	38.3306	10	10
464	Hao et al, 2020	nitrogen deposition	RB (root biomass)	Betula platyphylla	ECM	74.23	9.38	81.85	6.6	4	4
465	Hao et al, 2020	nitrogen deposition	RB (root biomass)	Fraxinus mandschurica	AM	74.23	9.38	63.15	7.86	4	4
466	Hao et al, 2020	nitrogen deposition	RB (root biomass)	Pinus koraiensis	ECM	74.23	9.38	55.21	11.2	4	4
467	Jing et al, 2021	nitrogen deposition	RB (root biomass)	Pinus tabulaeformis	ECM	76.91	6.63	74.52	6.8	4	4
468	Li et al, 2020	nitrogen deposition	RB (root biomass)	Pinus tabulaeformis	ECM	76.91	6.63	74.52	6.8	4	4
469	Jing et al, 2021	nitrogen deposition	RB (root biomass)	Pinus tabulaeformis	ECM	76.91	6.63	75.06	7.2	4	4
470	Li et al, 2020	nitrogen deposition	RB (root biomass)	Pinus tabulaeformis	ECM	76.91	6.63	75.06	7.2	4	4
471	Jing et al, 2021	nitrogen deposition	RB (root biomass)	Pinus tabulaeformis	ECM	76.91	6.63	74.53	7.41	4	4
472	Li et al, 2020	nitrogen deposition	RB (root biomass)	Pinus tabulaeformis	ECM	76.91	6.63	74.53	7.41	4	4
473	Xu et al, 2018	nitrogen deposition	RB (root biomass)	Eucalyptus urophylla	ECM	78.6885	8.7432	113.661	8.743	4	4
474	Xu et al, 2018	nitrogen deposition	RB (root biomass)	Eucalyptus urophylla	ECM	78.6885	8.7432	170.492	8.743	4	4
475	Hao et al, 2020	nitrogen deposition	RB (root biomass)	Betula platyphylla	ECM	83.1	4.56	77.66	3.82	4	4
476	Hao et al, 2020	nitrogen deposition	RB (root biomass)	Larix olgensis	ECM	83.1	4.56	65.64	7.76	4	4
477	Hao et al, 2020	nitrogen deposition	RB (root biomass)	Fraxinus mandschurica	AM	83.1	4.56	71.21	8.92	4	4
478	Huang et al, 2015	nitrogen deposition	RB (root biomass)	Acmena acuminatissima	AM	96	27.7128	96	27.7128	3	3
479	Huang et al, 2015	nitrogen deposition	RB (root biomass)	Syzygium hancei	AM	108	41.5692	80	20.7846	3	3
480	Walker et al, 1997	nitrogen deposition	RB (root biomass)	Pinus ponderosa	ECM	123.5	36.3731	160.7	40.3568	3	3
481	Walker et al, 1997	nitrogen deposition	RB (root biomass)	Pinus ponderosa	ECM	123.5	36.3731	234.5	95.2628	3	3
482	Wu et al, 2011	nitrogen deposition	RB (root biomass)	Liquidambar formosana	AM	315.152	76.6599	412.121	124.575	10	10
483	Huang et al, 2015	nitrogen deposition	RB (root biomass)	Castanopsis hystrix	ECM	320	62.3538	292	41.5692	3	3
484	Wu et al, 2011	nitrogen deposition	RB (root biomass)	Elaeocarpus glabripetalus	AM	375.758	114.99	442.424	86.2448	10	10
485	Huang et al, 2015	nitrogen deposition	RB (root biomass)	Schima superba	AM	404	180.133	532	166.277	3	3
486	Huang et al, 2015	nitrogen deposition	RB (root biomass)	Ormosia pinnata	AM	440	48.4974	500	173.205	3	3
487	Duan et al, 2009	nitrogen deposition	R/S (root biomass/shoot biomass)	Syzygium hancei	AM	0.25181	0.00566	0.21632	0.00239	3	3
488	Luo et al, 2020	nitrogen deposition	R/S (root biomass/shoot biomass)	Populus cathayana	AM	0.18	0.0489898	0.08	0.00244949	6	6
489	Wang et al, 2017	nitrogen deposition	R/S (root biomass/shoot biomass)	Tsoongiodendrn odorum	AM	0.82014	0.01825	0.51657	0.00304	6	6
490	Wang et al, 2017	nitrogen deposition	R/S (root biomass/shoot biomass)	Semiliquidambar cathayensis	AM	0.31799	0.01497	0.38515	0.00492	6	6
491	Wang et al, 2017	nitrogen deposition	R/S (root biomass/shoot biomass)	Tsoongiodendrn odorum	AM	0.82014	0.01825	0.56563	0.00514	6	6
492	Wang et al, 2017	nitrogen deposition	R/S (root biomass/shoot biomass)	Tsoongiodendrn odorum	AM	0.82014	0.01825	0.50472	0.00515	6	6
493	Huang et al, 2015	nitrogen deposition	R/S (root biomass/shoot biomass)	Castanopsis hystrix	ECM	0.31344	0.00533472	0.27095	0.00517883	3	3
494	Wang et al, 2017	nitrogen deposition	R/S (root biomass/shoot biomass)	Semiliquidambar cathayensis	AM	0.31799	0.01497	0.40792	0.00561	6	6
495	Duan et al, 2009	nitrogen deposition	R/S (root biomass/shoot biomass)	Ormosia pinnata	AM	0.5967	0.01422	0.58421	0.00655	3	3
496	Duan et al, 2009	nitrogen deposition	R/S (root biomass/shoot biomass)	Castanopsis hystrix	ECM	0.258162	0.011329	0.279061	0.006583	3	3
497	Huang et al, 2015	nitrogen deposition	R/S (root biomass/shoot biomass)	Syzygium hancei	AM	0.23281	0.00807136	0.20226	0.00744782	3	3
498	Duan et al, 2009	nitrogen deposition	R/S (root biomass/shoot biomass)	Acmena acuminatissima	AM	0.44005	0.04229	0.30671	0.0081	3	3
499	Khurana et al, 2004	nitrogen deposition	R/S (root biomass/shoot biomass)	Albizia procera	AM	0.38018	0.02407	0.14513	0.01056	5	5
500	Wang et al, 2017	nitrogen deposition	R/S (root biomass/shoot biomass)	Symplocos tetagona	AM	0.09032	0.00819	0.1425	0.0117	6	6
501	Wang et al, 2017	nitrogen deposition	R/S (root biomass/shoot biomass)	Symplocos tetagona	AM	0.09032	0.00819	0.13142	0.0117	6	6
502	Wang et al, 2017	nitrogen deposition	R/S (root biomass/shoot biomass)	Semiliquidambar cathayensis	AM	0.31799	0.01497	0.3818	0.01194	6	6
503	Khurana et al, 2004	nitrogen deposition	R/S (root biomass/shoot biomass)	Acacia nilotica	AM	0.48245	0.0112	0.44353	0.01268	5	5
504	Khurana et al, 2004	nitrogen deposition	R/S (root biomass/shoot biomass)	Terminalia arjuna	AM	0.82254	0.02348	0.65115	0.01292	5	5
505	Khurana et al, 2004	nitrogen deposition	R/S (root biomass/shoot biomass)	Acacia nilotica	AM	0.60101	0.05723	0.22596	0.01497	5	5
506	Huang et al, 2015	nitrogen deposition	R/S (root biomass/shoot biomass)	Acmena acuminatissima	AM	0.19528	0.00744782	0.19678	0.0153633	3	3
507	Khurana et al, 2004	nitrogen deposition	R/S (root biomass/shoot biomass)	Terminalia arjuna	AM	0.83515	0.03332	0.58567	0.01563	5	5
508	Wang et al, 2017	nitrogen deposition	R/S (root biomass/shoot biomass)	Symplocos tetagona	AM	0.09032	0.00819	0.11505	0.01709	6	6
509	Duan et al, 2009	nitrogen deposition	R/S (root biomass/shoot biomass)	Schima superba	AM	0.38596	0.02036	0.31775	0.0175	3	3
510	Wang et al, 2017	nitrogen deposition	R/S (root biomass/shoot biomass)	Tsoongiodendrn odorum	AM	0.82014	0.01825	0.70821	0.01801	6	6
511	Zhao et al, 2009	nitrogen deposition	R/S (root biomass/shoot biomass)	Pinus tabulaeformis	ECM	0.47956	0.01528	0.40777	0.01824	4	4
512	Wang et al, 2017	nitrogen deposition	R/S (root biomass/shoot biomass)	Semiliquidambar cathayensis	AM	0.31799	0.01497	0.4197	0.01848	6	6
513	Wang et al, 2017	nitrogen deposition	R/S (root biomass/shoot biomass)	Symplocos tetagona	AM	0.09032	0.00819	0.12409	0.01918	6	6
514	Li et al, 2016	nitrogen deposition	R/S (root biomass/shoot biomass)	Larix olgensis	ECM	0.44	0.0894427	0.43	0.0223607	5	5
515	Li et al, 2016	nitrogen deposition	R/S (root biomass/shoot biomass)	Larix kaempferi	ECM	0.6	0.067082	0.51	0.0223607	5	5
516	Khurana et al, 2004	nitrogen deposition	R/S (root biomass/shoot biomass)	Terminalia chebula	ECM	0.44382	0.02772	0.24064	0.02743	5	5
517	Khurana et al, 2004	nitrogen deposition	R/S (root biomass/shoot biomass)	Acacia nilotica	AM	0.60101	0.05723	0.24355	0.02759	5	5
518	Khurana et al, 2004	nitrogen deposition	R/S (root biomass/shoot biomass)	Albizia procera	AM	0.38018	0.02407	0.25313	0.02789	5	5
519	Khurana et al, 2004	nitrogen deposition	R/S (root biomass/shoot biomass)	Albizia procera	AM	0.54788	0.04714	0.25509	0.02861	5	5
520	Huang et al, 2015	nitrogen deposition	R/S (root biomass/shoot biomass)	Schima superba	AM	0.36065	0.05307	0.29771	0.028752	3	3
521	Khurana et al, 2004	nitrogen deposition	R/S (root biomass/shoot biomass)	Phyllanthus emblica	AM	0.83987	0.07608	0.63226	0.03391	5	5
522	Mo et al, 2008	nitrogen deposition	R/S (root biomass/shoot biomass)	Schima superba	AM	0.44	0.0866025	0.29	0.034641	3	3
523	Mo et al, 2008	nitrogen deposition	R/S (root biomass/shoot biomass)	Cryptocarya concinna	AM	0.44	0.0866025	0.32	0.034641	3	3
524	Mo et al, 2008	nitrogen deposition	R/S (root biomass/shoot biomass)	Cryptocarya concinna	AM	0.44	0.0866025	0.36	0.034641	3	3
525	Mo et al, 2008	nitrogen deposition	R/S (root biomass/shoot biomass)	Schima superba	AM	0.53	0.103923	0.31	0.034641	3	3
526	Mo et al, 2008	nitrogen deposition	R/S (root biomass/shoot biomass)	Cryptocarya concinna	AM	0.53	0.103923	0.4	0.034641	3	3
527	Wang et al, 2019	nitrogen deposition	R/S (root biomass/shoot biomass)	Cinnamomum burmanni	AM	0.43766	0.02895	0.41023	0.03505	4	4
528	Khurana et al, 2004	nitrogen deposition	R/S (root biomass/shoot biomass)	Albizia procera	AM	0.38018	0.02407	0.44037	0.03698	5	5
529	Khurana et al, 2004	nitrogen deposition	R/S (root biomass/shoot biomass)	Phyllanthus emblica	AM	0.83987	0.07608	0.53848	0.03863	5	5
530	Khurana et al, 2004	nitrogen deposition	R/S (root biomass/shoot biomass)	Phyllanthus emblica	AM	0.94424	0.00851	0.33878	0.03904	5	5
531	Wang et al, 2016	nitrogen deposition	R/S (root biomass/shoot biomass)	Quercus acutissima	ECM	0.44	0.07	0.38	0.04	6	6
532	Xie et al, 2019	nitrogen deposition	R/S (root biomass/shoot biomass)	Archidendron clypearia	ECM	1.2	0.09	1	0.04	7	7
533	Guo et al, 2014	nitrogen deposition	R/S (root biomass/shoot biomass)	Acer truncatum	AM	0.37129	0.0492249	0.36072	0.0404953	3	3
534	Khurana et al, 2004	nitrogen deposition	R/S (root biomass/shoot biomass)	Phyllanthus emblica	AM	0.94424	0.00851	0.83096	0.04226	5	5
535	Khurana et al, 2004	nitrogen deposition	R/S (root biomass/shoot biomass)	Albizia procera	AM	0.54788	0.04714	0.38278	0.04247	5	5
536	Guo et al, 2014	nitrogen deposition	R/S (root biomass/shoot biomass)	Acer truncatum	AM	0.37129	0.0492249	0.32683	0.0431627	3	3
537	Khurana et al, 2004	nitrogen deposition	R/S (root biomass/shoot biomass)	Terminalia chebula	ECM	0.55849	0.14294	0.18312	0.04608	5	5
538	Khurana et al, 2004	nitrogen deposition	R/S (root biomass/shoot biomass)	Terminalia arjuna	AM	0.83515	0.03332	0.73282	0.04777	5	5
539	Wu et al, 2011	nitrogen deposition	R/S (root biomass/shoot biomass)	Pinus massoniana	ECM	0.18927	0.0927496	0.15997	0.0489204	10	10
540	Luo et al, 2019	nitrogen deposition	R/S (root biomass/shoot biomass)	Populus cathayana	AM	0.18	0.0489898	0.11	0.0489898	6	6
541	Huang et al, 2015	nitrogen deposition	R/S (root biomass/shoot biomass)	Ormosia pinnata	AM	0.4564	0.0113969	0.43718	0.049121	3	3
542	Chang et al, 2019	nitrogen deposition	R/S (root biomass/shoot biomass)	Castanopsis fargesii	ECM	0.49	0.14	0.38	0.05	3	3
543	Wang et al, 2014	nitrogen deposition	R/S (root biomass/shoot biomass)	Quercus chenii	ECM	1.52	0.17	1.21	0.05	5	5
544	Wang et al, 2014	nitrogen deposition	R/S (root biomass/shoot biomass)	Quercus variabilis	ECM	2.07	0.13	1.7	0.05	5	5
545	Kinney et al, 1997	nitrogen deposition	R/S (root biomass/shoot biomass)	Acer saccharum	AM	0.68237	0.149394	0.41376	0.0509739	6	6
546	Zhao et al, 2009	nitrogen deposition	R/S (root biomass/shoot biomass)	Picea asperata	ECM	0.54935	0.02608	0.45074	0.05142	4	4
547	Hatenschwiler et al, 1997	nitrogen deposition	R/S (root biomass/shoot biomass)	Picea abies	ECM	0.377	0.06755	0.314	0.0519615	3	3
548	Eller et al, 2011	nitrogen deposition	R/S (root biomass/shoot biomass)	Tsuga canadensis	ECM	0.4	0.069282	0.42	0.0519615	3	3
549	Wu et al, 2011	nitrogen deposition	R/S (root biomass/shoot biomass)	Schima superba	AM	0.26719	0.0648267	0.21197	0.0527468	10	10
550	Liu et al, 2021	nitrogen deposition	R/S (root biomass/shoot biomass)	Cunninghamia lanceolata	AM	0.58853	0.097023	0.64753	0.0528159	5	5
551	ZhangA et al, 2019	nitrogen deposition	R/S (root biomass/shoot biomass)	Pinus massoniana	ECM	0.511	0.1672	0.4979	0.0592	6	6
552	Wang et al, 2014	nitrogen deposition	R/S (root biomass/shoot biomass)	Quercus acutissima	ECM	0.44	0.07	0.46	0.06	6	6
553	Wang et al, 2016	nitrogen deposition	R/S (root biomass/shoot biomass)	Quercus acutissima	ECM	1.2	0.09	0.84	0.06	7	7
554	Xie et al, 2019	nitrogen deposition	R/S (root biomass/shoot biomass)	Archidendron clypearia	ECM	1.45	0.08	1.12	0.06	5	5
555	Wu et al, 2011	nitrogen deposition	R/S (root biomass/shoot biomass)	Cyclobalanopsis glauca	AM	0.25465	0.0800689	0.1924	0.0603679	10	10
556	Kinney et al, 1997	nitrogen deposition	R/S (root biomass/shoot biomass)	Quercus rubra	ECM	0.93214	0.0544767	1.06681	0.0607473	6	6
557	Khurana et al, 2004	nitrogen deposition	R/S (root biomass/shoot biomass)	Terminalia arjuna	AM	0.83515	0.03332	0.75936	0.06134	5	5
558	Guo et al, 2014	nitrogen deposition	R/S (root biomass/shoot biomass)	Acer truncatum	AM	0.37129	0.0492249	0.31255	0.0628388	3	3
559	WangB et al, 2018	nitrogen deposition	R/S (root biomass/shoot biomass)	Robinia pseudoacacia	ECM	0.39558	0.06857	0.47231	0.06648	6	6
560	Atwell et al, 2009	nitrogen deposition	R/S (root biomass/shoot biomass)	Eucalyptus pauciflora	ECM	0.278552	0.120616	0.154321	0.0668229	3	3
561	Hatenschwiler et al, 1997	nitrogen deposition	R/S (root biomass/shoot biomass)	Picea abies	ECM	0.377	0.06755	0.317	0.06755	3	3
562	Mo et al, 2008	nitrogen deposition	R/S (root biomass/shoot biomass)	Schima superba	AM	0.53	0.103923	0.41	0.069282	3	3
563	Mo et al, 2008	nitrogen deposition	R/S (root biomass/shoot biomass)	Schima superba	AM	0.53	0.103923	0.42	0.069282	3	3
564	WangB et al, 2018	nitrogen deposition	R/S (root biomass/shoot biomass)	Robinia pseudoacacia	ECM	0.39558	0.06857	0.41856	0.06952	6	6
565	Chang et al, 2019	nitrogen deposition	R/S (root biomass/shoot biomass)	Cyclobalanopsis jensenniana	AM	0.6	0.13	0.42	0.07	3	3
566	Khurana et al, 2004	nitrogen deposition	R/S (root biomass/shoot biomass)	Albizia procera	AM	0.54788	0.04714	0.25538	0.07048	5	5
567	Luo et al, 2014	nitrogen deposition	R/S (root biomass/shoot biomass)	Robinia pseudoacacia	ECM	0.3669	0.121495	0.4289	0.0707903	6	6
568	Khurana et al, 2004	nitrogen deposition	R/S (root biomass/shoot biomass)	Phyllanthus emblica	AM	0.83987	0.07608	0.68918	0.07107	5	5
569	Khurana et al, 2004	nitrogen deposition	R/S (root biomass/shoot biomass)	Acacia nilotica	AM	0.60101	0.05723	0.49302	0.07162	5	5
570	Wu et al, 2011	nitrogen deposition	R/S (root biomass/shoot biomass)	Liquidambar formosana	AM	0.48163	0.143567	0.36554	0.0724162	10	10
571	WangB et al, 2018	nitrogen deposition	R/S (root biomass/shoot biomass)	Robinia pseudoacacia	ECM	0.39558	0.06857	0.46555	0.07486	6	6
572	Khurana et al, 2004	nitrogen deposition	R/S (root biomass/shoot biomass)	Phyllanthus emblica	AM	0.94424	0.00851	0.73177	0.07572	5	5
573	ZhangA et al, 2019	nitrogen deposition	R/S (root biomass/shoot biomass)	Pinus massoniana	ECM	0.511	0.1672	0.465	0.078	6	6
574	WangB et al, 2018	nitrogen deposition	R/S (root biomass/shoot biomass)	Robinia pseudoacacia	ECM	0.39558	0.06857	0.52101	0.07905	6	6
575	Xie et al, 2019	nitrogen deposition	R/S (root biomass/shoot biomass)	Ormosia semicastrata	AM	0.32	0.21	0.57	0.08	6	6
576	Atwell et al, 2009	nitrogen deposition	R/S (root biomass/shoot biomass)	Eucalyptus pauciflora	ECM	0.290698	0.125876	0.191205	0.082794	3	3
577	Walker et al, 1997	nitrogen deposition	R/S (root biomass/shoot biomass)	Pinus ponderosa	ECM	0.212766	0.0921304	0.196078	0.0849045	3	3
578	Mo et al, 2008	nitrogen deposition	R/S (root biomass/shoot biomass)	Cryptocarya concinna	AM	0.44	0.0866025	0.38	0.0866025	3	3
579	Luo et al, 2014	nitrogen deposition	R/S (root biomass/shoot biomass)	Robinia pseudoacacia	ECM	0.3669	0.121495	0.4268	0.0889165	6	6
580	WangA et al, 2016	nitrogen deposition	R/S (root biomass/shoot biomass)	Fraxinus mandshurica	AM	1.97	0.447214	1.53	0.0894427	5	5
581	Khurana et al, 2004	nitrogen deposition	R/S (root biomass/shoot biomass)	Terminalia chebula	ECM	0.55849	0.14294	0.15056	0.08981	5	5
582	Wang et al, 2014	nitrogen deposition	R/S (root biomass/shoot biomass)	Quercus chenii	ECM	1.02	0.16	0.97	0.09	7	7
583	Wang et al, 2014	nitrogen deposition	R/S (root biomass/shoot biomass)	Quercus acutissima	ECM	1.2	0.09	1	0.09	7	7
584	Wang et al, 2016	nitrogen deposition	R/S (root biomass/shoot biomass)	Quercus chenii	ECM	1.45	0.08	1.18	0.09	5	5
585	Wang et al, 2016	nitrogen deposition	R/S (root biomass/shoot biomass)	Quercus acutissima	ECM	1.52	0.17	1.14	0.09	5	5
586	Kinney et al, 1997	nitrogen deposition	R/S (root biomass/shoot biomass)	Populus tremuloides	AM	0.56058	0.101237	0.63939	0.0914395	6	6
587	WangB et al, 2018	nitrogen deposition	R/S (root biomass/shoot biomass)	Senna surattensis	AM	0.64624	0.08362	0.51221	0.09181	6	6
588	Wu et al, 2011	nitrogen deposition	R/S (root biomass/shoot biomass)	Elaeocarpus glabripetalus	AM	0.51788	0.110553	0.43433	0.0921171	10	10
589	Walker et al, 1997	nitrogen deposition	R/S (root biomass/shoot biomass)	Pinus ponderosa	ECM	0.212766	0.0921304	0.212766	0.0921304	3	3
590	Cui et al, 2019	nitrogen deposition	R/S (root biomass/shoot biomass)	Fraxinus mandshurica	AM	1.15356	0.18852	1.07295	0.09916	5	5
591	Tripathi et al, 2014	nitrogen deposition	R/S (root biomass/shoot biomass)	Dalbergia sissoo	AM	0.34	0.147224	0.23	0.0995929	3	3
592	Tripathi et al, 2014	nitrogen deposition	R/S (root biomass/shoot biomass)	Dalbergia sissoo	AM	0.34	0.147224	0.24	0.103923	3	3
593	Xu et al, 2015	nitrogen deposition	R/S (root biomass/shoot biomass)	Quercus mongolica	ECM	0.7349	0.234414	0.7572	0.10874	7	7
594	Guo et al, 2014	nitrogen deposition	R/S (root biomass/shoot biomass)	Acer truncatum	AM	0.37129	0.0492249	0.38824	0.109414	3	3
595	Wang et al, 2016	nitrogen deposition	R/S (root biomass/shoot biomass)	Quercus chenii	ECM	1.02	0.16	0.86	0.11	7	7
596	Wang et al, 2016	nitrogen deposition	R/S (root biomass/shoot biomass)	Quercus variabilis	ECM	1.88	0.29	1.08	0.11	7	7
597	Wang et al, 2016	nitrogen deposition	R/S (root biomass/shoot biomass)	Quercus variabilis	ECM	1.88	0.29	1.42	0.11	7	7
598	WangA et al, 2016	nitrogen deposition	R/S (root biomass/shoot biomass)	Fraxinus mandshurica	AM	1.97	0.447214	1.37	0.111803	5	5
599	WangA et al, 2016	nitrogen deposition	R/S (root biomass/shoot biomass)	Fraxinus mandshurica	AM	1.97	0.447214	1.77	0.111803	5	5
600	Liu et al, 2021	nitrogen deposition	R/S (root biomass/shoot biomass)	Phoebe chekiangensis	AM	0.6236	0.0773903	0.35722	0.112206	5	5
601	Khurana et al, 2004	nitrogen deposition	R/S (root biomass/shoot biomass)	Acacia nilotica	AM	0.48245	0.0112	0.34886	0.11235	5	5
602	Cui et al, 2019	nitrogen deposition	R/S (root biomass/shoot biomass)	Pinus koraiensis	ECM	0.7781	0.1619	0.5838	0.1132	5	5
603	WangB et al, 2018	nitrogen deposition	R/S (root biomass/shoot biomass)	Sophora japonica	AM	1.03387	0.23791	0.60082	0.11524	6	6
604	WangA et al, 2018	nitrogen deposition	R/S (root biomass/shoot biomass)	Fraxinus mandshurica	AM	1.27915	0.319787	0.461741	0.115435	6	6
605	Tripathi et al, 2014	nitrogen deposition	R/S (root biomass/shoot biomass)	Bridelia retusa	ECM	0.55	0.238157	0.27	0.116913	3	3
606	Luo et al, 2014	nitrogen deposition	R/S (root biomass/shoot biomass)	Robinia pseudoacacia	ECM	0.3669	0.121495	0.4725	0.11978	6	6
607	Wang et al, 2014	nitrogen deposition	R/S (root biomass/shoot biomass)	Quercus fabri	ECM	1.02	0.16	0.79	0.12	7	7
608	Wang et al, 2014	nitrogen deposition	R/S (root biomass/shoot biomass)	Quercus variabilis	ECM	1.78	0.24	1.21	0.12	5	5
609	Wang et al, 2016	nitrogen deposition	R/S (root biomass/shoot biomass)	Quercus chenii	ECM	2.07	0.13	2.03	0.12	5	5
610	Eller et al, 2011	nitrogen deposition	R/S (root biomass/shoot biomass)	Lagerstroemia parviflra	ECM	0.46	0.199186	0.28	0.121244	3	3
611	Tripathi et al, 2014	nitrogen deposition	R/S (root biomass/shoot biomass)	Acer saccharum	AM	1.32	0.0866025	1.06	0.121244	3	3
612	WangA et al, 2018	nitrogen deposition	R/S (root biomass/shoot biomass)	Fraxinus mandshurica	AM	1.27915	0.319787	0.496972	0.124243	6	6
613	Khurana et al, 2004	nitrogen deposition	R/S (root biomass/shoot biomass)	Acacia nilotica	AM	0.48245	0.0112	0.31702	0.1274	5	5
614	ZhangA et al, 2019	nitrogen deposition	R/S (root biomass/shoot biomass)	Pinus massoniana	ECM	0.511	0.1672	0.7684	0.1277	6	6
615	Tripathi et al, 2014	nitrogen deposition	R/S (root biomass/shoot biomass)	Acacia catechu	AM	0.34	0.147224	0.3	0.129904	3	3
616	Tripathi et al, 2014	nitrogen deposition	R/S (root biomass/shoot biomass)	Dalbergia sissoo	AM	0.42	0.181865	0.3	0.129904	3	3
617	Xie et al, 2019	nitrogen deposition	R/S (root biomass/shoot biomass)	Archidendron clypearia	ECM	0.44	0.07	0.39	0.13	6	6
618	ZhangA et al, 2019	nitrogen deposition	R/S (root biomass/shoot biomass)	Pinus massoniana	ECM	0.511	0.1672	0.6473	0.1372	6	6
619	Tripathi et al, 2014	nitrogen deposition	R/S (root biomass/shoot biomass)	Acacia catechu	AM	0.42	0.181865	0.32	0.138564	3	3
620	Chang et al, 2019	nitrogen deposition	R/S (root biomass/shoot biomass)	Quercus acutissima	ECM	0.44	0.14	0.55	0.14	3	3
621	Wang et al, 2016	nitrogen deposition	R/S (root biomass/shoot biomass)	Quercus fabri	ECM	1.21	0.15	1.11	0.14	7	7
622	Khurana et al, 2004	nitrogen deposition	R/S (root biomass/shoot biomass)	Terminalia chebula	ECM	0.55849	0.14294	0.35246	0.14059	5	5
623	Euring et al, 2012	nitrogen deposition	R/S (root biomass/shoot biomass)	Populus trichocarpa	ECM	0.55	0.0848528	0.45	0.141421	8	8
624	WangA et al, 2018	nitrogen deposition	R/S (root biomass/shoot biomass)	Fraxinus mandshurica	AM	1.27915	0.319787	0.582382	0.145596	6	6
625	Tripathi et al, 2014	nitrogen deposition	R/S (root biomass/shoot biomass)	Bridelia retusa	ECM	0.55	0.238157	0.34	0.147224	3	3
626	WangA et al, 2018	nitrogen deposition	R/S (root biomass/shoot biomass)	Fraxinus mandshurica	AM	1.27915	0.319787	0.589764	0.147441	6	6
627	Wang et al, 2016	nitrogen deposition	R/S (root biomass/shoot biomass)	Ormosia balansae	AM	0.65	0.1	0.65	0.15	6	6
628	Xie et al, 2019	nitrogen deposition	R/S (root biomass/shoot biomass)	Quercus fabri	ECM	1.21	0.15	0.69	0.15	7	7
629	Khurana et al, 2004	nitrogen deposition	R/S (root biomass/shoot biomass)	Terminalia chebula	ECM	0.44382	0.02772	0.32999	0.1501	5	5
630	Tripathi et al, 2014	nitrogen deposition	R/S (root biomass/shoot biomass)	Lagerstroemia parviflra	ECM	0.46	0.199186	0.35	0.151554	3	3
631	ZhangA et al, 2019	nitrogen deposition	R/S (root biomass/shoot biomass)	Schima superba	AM	1.0371	0.1991	0.8276	0.1559	6	6
632	Zhang et al, 2013	nitrogen deposition	R/S (root biomass/shoot biomass)	Schima superba	AM	1.03316	0.22227	0.83906	0.15944	9	9
633	Wang et al, 2014	nitrogen deposition	R/S (root biomass/shoot biomass)	Quercus fabri	ECM	0.44	0.07	0.39	0.16	6	6
634	Xie et al, 2019	nitrogen deposition	R/S (root biomass/shoot biomass)	Archidendron clypearia	ECM	1.78	0.24	1.22	0.16	5	5
635	WangB et al, 2018	nitrogen deposition	R/S (root biomass/shoot biomass)	Senna surattensis	AM	0.64624	0.08362	0.58481	0.16095	6	6
636	WangA et al, 2018	nitrogen deposition	R/S (root biomass/shoot biomass)	Fraxinus mandshurica	AM	1.27915	0.319787	0.644634	0.161159	6	6
637	WangA et al, 2018	nitrogen deposition	R/S (root biomass/shoot biomass)	Fraxinus mandshurica	AM	1.27915	0.319787	0.645962	0.16149	6	6
638	Tripathi et al, 2014	nitrogen deposition	R/S (root biomass/shoot biomass)	Acacia catechu	AM	0.42	0.181865	0.38	0.164545	3	3
639	ZhangA et al, 2019	nitrogen deposition	R/S (root biomass/shoot biomass)	Schima superba	AM	1.0371	0.1991	0.8549	0.1663	6	6
640	Tripathi et al, 2014	nitrogen deposition	R/S (root biomass/shoot biomass)	Lagerstroemia parviflra	ECM	0.46	0.199186	0.39	0.168875	3	3
641	Wang et al, 2014	nitrogen deposition	R/S (root biomass/shoot biomass)	Quercus acutissima	ECM	1.45	0.08	1.21	0.17	5	5
642	Wang et al, 2014	nitrogen deposition	R/S (root biomass/shoot biomass)	Quercus chenii	ECM	1.52	0.17	1.34	0.17	5	5
643	Zhang et al, 2013	nitrogen deposition	R/S (root biomass/shoot biomass)	Schima superba	AM	1.03316	0.22227	0.8627	0.17037	9	9
644	Cui et al, 2019	nitrogen deposition	R/S (root biomass/shoot biomass)	Pinus koraiensis	ECM	0.7781	0.1619	0.6303	0.1727	5	5
645	Tripathi et al, 2014	nitrogen deposition	R/S (root biomass/shoot biomass)	Terminalia arjuna	AM	0.53	0.229497	0.4	0.173205	3	3
646	Khurana et al, 2004	nitrogen deposition	R/S (root biomass/shoot biomass)	Terminalia arjuna	AM	0.82254	0.02348	0.78912	0.17376	5	5
647	Walker et al, 1998	nitrogen deposition	R/S (root biomass/shoot biomass)	Pinus ponderosa	ECM	0.358423	0.200365	0.31746	0.177466	5	5
648	Walker et al, 1998	nitrogen deposition	R/S (root biomass/shoot biomass)	Pinus ponderosa	ECM	0.358423	0.200365	0.31746	0.177466	5	5
649	Khurana et al, 2004	nitrogen deposition	R/S (root biomass/shoot biomass)	Terminalia arjuna	AM	0.82254	0.02348	0.7002	0.17757	5	5
650	Khurana et al, 2004	nitrogen deposition	R/S (root biomass/shoot biomass)	Terminalia chebula	ECM	0.44382	0.02772	0.29283	0.17841	5	5
651	Wang et al, 2014	nitrogen deposition	R/S (root biomass/shoot biomass)	Ormosia semicastrata	AM	0.32	0.21	0.46	0.18	6	6
652	Xie et al, 2019	nitrogen deposition	R/S (root biomass/shoot biomass)	Quercus glandulifera	ECM	1.92	0.22	1.75	0.18	5	5
653	Luo et al, 2014	nitrogen deposition	R/S (root biomass/shoot biomass)	Quercusacutissima	ECM	1.4449	0.291734	1.2442	0.181262	6	6
654	Tripathi et al, 2014	nitrogen deposition	R/S (root biomass/shoot biomass)	Terminalia arjuna	AM	0.53	0.229497	0.42	0.181865	3	3
655	Cui et al, 2019	nitrogen deposition	R/S (root biomass/shoot biomass)	Fraxinus mandshurica	AM	1.15356	0.18852	1.091	0.18233	5	5
656	Wang et al, 2016	nitrogen deposition	R/S (root biomass/shoot biomass)	Quercus glandulifera	ECM	1.86	0.41	0.85	0.19	7	7
657	WangB et al, 2018	nitrogen deposition	R/S (root biomass/shoot biomass)	Senna surattensis	AM	0.64624	0.08362	0.61573	0.19181	6	6
658	Tripathi et al, 2014	nitrogen deposition	R/S (root biomass/shoot biomass)	Bridelia retusa	ECM	0.55	0.238157	0.45	0.194856	3	3
659	Zhang et al, 2013	nitrogen deposition	R/S (root biomass/shoot biomass)	Schima superba	AM	1.03316	0.22227	0.96964	0.19793	9	9
660	Wang et al, 2014	nitrogen deposition	R/S (root biomass/shoot biomass)	Quercus variabilis	ECM	2.07	0.13	1.38	0.2	5	5
661	WangA et al, 2016	nitrogen deposition	R/S (root biomass/shoot biomass)	Fraxinus mandshurica	AM	1.97	0.447214	1.58	0.201246	5	5
662	WangB et al, 2018	nitrogen deposition	R/S (root biomass/shoot biomass)	Senna surattensis	AM	0.64624	0.08362	0.50255	0.204	6	6
663	Tripathi et al, 2014	nitrogen deposition	R/S (root biomass/shoot biomass)	Terminalia arjuna	AM	0.53	0.229497	0.48	0.207846	3	3
664	WangB et al, 2018	nitrogen deposition	R/S (root biomass/shoot biomass)	Sophora japonica	AM	1.03387	0.23791	0.75889	0.22229	6	6
665	Xu et al, 2015	nitrogen deposition	R/S (root biomass/shoot biomass)	Quercus variabilis	ECM	0.9658	0.356118	0.8023	0.228593	7	7
666	LiB et al, 2018	nitrogen deposition	R/S (root biomass/shoot biomass)	Quercus acutissima	ECM	1.52759	0.17571	1.59859	0.232104	5	5
667	Wang et al, 2016	nitrogen deposition	R/S (root biomass/shoot biomass)	Quercus glandulifera	ECM	1.86	0.41	1.8	0.24	7	7
668	Euring et al, 2012	nitrogen deposition	R/S (root biomass/shoot biomass)	Populus tremula	AM	1.08	0.113137	0.94	0.254558	8	8
669	Wang et al, 2014	nitrogen deposition	R/S (root biomass/shoot biomass)	Quercus glandulifera	ECM	1.86	0.41	1.35	0.26	7	7
670	Wang et al, 2016	nitrogen deposition	R/S (root biomass/shoot biomass)	Quercus glandulifera	ECM	1.92	0.22	2.2	0.26	5	5
671	WangA et al, 2016	nitrogen deposition	R/S (root biomass/shoot biomass)	Fraxinus mandshurica	AM	1.97	0.447214	1.42	0.268328	5	5
672	Wang et al, 2016	nitrogen deposition	R/S (root biomass/shoot biomass)	Quercus variabilis	ECM	1.88	0.29	2.04	0.27	7	7
673	WangB et al, 2018	nitrogen deposition	R/S (root biomass/shoot biomass)	Sophora japonica	AM	1.03387	0.23791	0.92409	0.27447	6	6
674	WangB et al, 2018	nitrogen deposition	R/S (root biomass/shoot biomass)	Sophora japonica	AM	1.03387	0.23791	0.92698	0.2819	6	6
675	Xu et al, 2015	nitrogen deposition	R/S (root biomass/shoot biomass)	Quercus mongolica	ECM	0.7349	0.234414	0.95	0.304791	7	7
676	Xu et al, 2015	nitrogen deposition	R/S (root biomass/shoot biomass)	Quercus variabilis	ECM	0.9658	0.356118	1.072	0.309553	7	7
677	Xu et al, 2015	nitrogen deposition	R/S (root biomass/shoot biomass)	Quercus variabilis	ECM	0.9658	0.356118	1.3547	0.324369	7	7
678	Wang et al, 2016	nitrogen deposition	R/S (root biomass/shoot biomass)	Quercus fabri	ECM	1.21	0.15	1.09	0.33	7	7
679	LiB et al, 2018	nitrogen deposition	R/S (root biomass/shoot biomass)	Quercus acutissima	ECM	2.37477	0.526035	2.10399	0.330826	5	5
680	LiB et al, 2018	nitrogen deposition	R/S (root biomass/shoot biomass)	Quercus acutissima	ECM	1.52759	0.17571	1.49934	0.334069	5	5
681	Xie et al, 2019	nitrogen deposition	R/S (root biomass/shoot biomass)	Ormosia semicastrata	AM	0.32	0.21	0.83	0.34	6	6
682	Luo et al, 2014	nitrogen deposition	R/S (root biomass/shoot biomass)	Quercusacutissima	ECM	1.4449	0.291734	1.2427	0.355176	6	6
683	Luo et al, 2014	nitrogen deposition	R/S (root biomass/shoot biomass)	Quercusacutissima	ECM	1.4449	0.291734	1.5624	0.376732	6	6
684	ZhangA et al, 2019	nitrogen deposition	R/S (root biomass/shoot biomass)	Schima superba	AM	1.0371	0.1991	1.3678	0.3908	6	6
685	Wang et al, 2014	nitrogen deposition	R/S (root biomass/shoot biomass)	Quercus fabri	ECM	1.78	0.24	2.11	0.42	5	5
686	Xu et al, 2015	nitrogen deposition	R/S (root biomass/shoot biomass)	Quercus mongolica	ECM	0.7349	0.234414	1.1134	0.466446	7	7
687	WangA et al, 2016	nitrogen deposition	R/S (root biomass/shoot biomass)	Fraxinus mandshurica	AM	1.97	0.447214	1.67	0.514296	5	5
688	Xie et al, 2019	nitrogen deposition	R/S (root biomass/shoot biomass)	Ormosia balansae	AM	0.65	0.1	0.79	0.52	6	6
689	Xie et al, 2019	nitrogen deposition	R/S (root biomass/shoot biomass)	Ormosia balansae	AM	0.65	0.1	0.94	0.54	6	6
690	Xie et al, 2019	nitrogen deposition	R/S (root biomass/shoot biomass)	Ormosia semicastrata	AM	0.32	0.21	0.99	0.56	6	6
691	ZhangA et al, 2019	nitrogen deposition	R/S (root biomass/shoot biomass)	Schima superba	AM	1.0371	0.1991	1.6844	0.5844	6	6
692	LiB et al, 2018	nitrogen deposition	R/S (root biomass/shoot biomass)	Quercus acutissima	ECM	2.37477	0.526035	2.28036	0.745125	5	5
693	Xie et al, 2019	nitrogen deposition	R/S (root biomass/shoot biomass)	Ormosia balansae	AM	0.65	0.1	0.52	0.94	6	6
694	Wang et al, 2014	nitrogen deposition	R/S (root biomass/shoot biomass)	Quercus glandulifera	ECM	1.92	0.22	2.58	1.1	5	5
695	Wang et al, 2017	nitrogen deposition	LB (leaf biomass)	Symplocos tetagona	AM	3.67412	0.13235	3.70059	0.02647	6	6
696	Wang et al, 2017	nitrogen deposition	LB (leaf biomass)	Symplocos tetagona	AM	3.67412	0.13235	3.91235	0.02647	6	6
697	Chang et al, 2019	nitrogen deposition	LB (leaf biomass)	Castanopsis fargesii	ECM	0.0215247	0.0035874	0.0914798	0.0269062	3	3
698	Pei et al, 2019	nitrogen deposition	LB (leaf biomass)	Toona sinensis	ECM	0.45	0.06	0.7	0.05	10	10
699	Pei et al, 2019	nitrogen deposition	LB (leaf biomass)	Toona sinensis	ECM	0.45	0.06	2.64	0.05	3	3
700	Wang et al, 2017	nitrogen deposition	LB (leaf biomass)	Symplocos tetagona	AM	3.67412	0.13235	3.59471	0.05294	6	6
701	Pei et al, 2019	nitrogen deposition	LB (leaf biomass)	Toona sinensis	ECM	0.45	0.06	1.65	0.06	10	10
702	Chang et al, 2019	nitrogen deposition	LB (leaf biomass)	Cyclobalanopsis jensenniana	AM	0.0735426	0.0233184	0.249327	0.068162	3	3
703	Pei et al, 2019	nitrogen deposition	LB (leaf biomass)	Toona sinensis	ECM	0.45	0.06	0.64	0.07	10	10
704	Pei et al, 2019	nitrogen deposition	LB (leaf biomass)	Toona sinensis	ECM	0.45	0.06	2.06	0.07	10	10
705	Wang et al, 2017	nitrogen deposition	LB (leaf biomass)	Semiliquidambar cathayensis	AM	3.91235	0.15883	4.49471	0.07941	6	6
706	Chang et al, 2019	nitrogen deposition	LB (leaf biomass)	Quercus acutissima	ECM	0.123767	0.035874	0.249327	0.084305	3	3
707	Zhao et al, 2009	nitrogen deposition	LB (leaf biomass)	Picea asperata	ECM	1.33906	0.0515	1.87983	0.103	4	4
708	Wang et al, 2017	nitrogen deposition	LB (leaf biomass)	Semiliquidambar cathayensis	AM	3.91235	0.15883	5.07706	0.10588	6	6
709	Wang et al, 2017	nitrogen deposition	LB (leaf biomass)	Semiliquidambar cathayensis	AM	3.91235	0.15883	5.10353	0.10588	6	6
710	Wang et al, 2017	nitrogen deposition	LB (leaf biomass)	Tsoongiodendrn odorum	AM	2.53588	0.10588	4.23	0.13235	6	6
711	Wang et al, 2017	nitrogen deposition	LB (leaf biomass)	Symplocos tetagona	AM	3.67412	0.13235	3.11824	0.13235	6	6
712	Wang et al, 2017	nitrogen deposition	LB (leaf biomass)	Tsoongiodendrn odorum	AM	2.53588	0.10588	4.44176	0.13236	6	6
713	Zhao et al, 2011	nitrogen deposition	LB (leaf biomass)	Populus cathayana	AM	3.69	0.268328	5.51	0.134164	5	5
714	Wang et al, 2014	nitrogen deposition	LB (leaf biomass)	Quercus fabri	ECM	1.6	0.34	2.22	0.19	5	5
715	Hatenschwiler et al, 1997	nitrogen deposition	LB (leaf biomass)	Picea abies	ECM	1.43	0.155885	1.37	0.190526	3	3
716	Hatenschwiler et al, 1997	nitrogen deposition	LB (leaf biomass)	Picea abies	ECM	1.43	0.155885	1.3	0.207846	3	3
717	Wang et al, 2014	nitrogen deposition	LB (leaf biomass)	Quercus chenii	ECM	1.43	0.45	1.39	0.21	5	5
718	Wang et al, 2014	nitrogen deposition	LB (leaf biomass)	Quercus glandulifera	ECM	2.4	0.34	2.29	0.21	5	5
719	Wang et al, 2017	nitrogen deposition	LB (leaf biomass)	Tsoongiodendrn odorum	AM	2.53588	0.10588	4.78588	0.26471	6	6
720	Wang et al, 2017	nitrogen deposition	LB (leaf biomass)	Semiliquidambar cathayensis	AM	2.53588	0.10588	3.43588	0.26471	6	6
721	Wang et al, 2017	nitrogen deposition	LB (leaf biomass)	Tsoongiodendrn odorum	AM	3.91235	0.15883	4.25647	0.26471	6	6
722	Ambebe et al, 2009	nitrogen deposition	LB (leaf biomass)	Betula papyrifera	ECM	0.929889	0.088561	4.69373	0.26568	4	4
723	Ambebe et al, 2009	nitrogen deposition	LB (leaf biomass)	Betula papyrifera	ECM	0.929889	0.088561	3.27675	0.26569	4	4
724	Wang et al, 2014	nitrogen deposition	LB (leaf biomass)	Quercus chenii	ECM	2.4	0.34	1.98	0.28	5	5
725	Tariq et al, 2019	nitrogen deposition	LB (leaf biomass)	Phoebe zhennan	AM	1.17	0.380132	1.2	0.290689	5	5
726	Zhao et al, 2009	nitrogen deposition	LB (leaf biomass)	Pinus tabulaeformis	ECM	3.01288	0.46352	5.02146	0.30902	4	4
727	Wang et al, 2014	nitrogen deposition	LB (leaf biomass)	Quercus variabilis	ECM	5.4	0.3	6.24	0.36	5	5
728	Fusaro et al, 2017	nitrogen deposition	LB (leaf biomass)	Fraxinus ornus	AM	2.91	0.4	4.8	0.48	5	5
729	Wang et al, 2014	nitrogen deposition	LB (leaf biomass)	Quercus acutissima	ECM	4.49	0.54	6.88	0.49	5	5
730	Wang et al, 2014	nitrogen deposition	LB (leaf biomass)	Quercus fabri	ECM	1.6	0.34	1.13	0.51	5	5
731	Wang et al, 2014	nitrogen deposition	LB (leaf biomass)	Quercus fabri	ECM	1.6	0.34	2.67	0.52	5	5
732	WangA et al, 2016	nitrogen deposition	LB (leaf biomass)	Fraxinus mandshurica	AM	7.73	2.68328	23.7	0.559017	5	5
733	Wang et al, 2014	nitrogen deposition	LB (leaf biomass)	Quercus variabilis	ECM	1.43	0.45	2.98	0.57	5	5
734	Wang et al, 2014	nitrogen deposition	LB (leaf biomass)	Quercus glandulifera	ECM	5.4	0.3	5.63	0.57	5	5
735	Zhang et al, 2013	nitrogen deposition	LB (leaf biomass)	Schima superba	AM	1.20408	0.46939	1.5102	0.59184	3	3
736	Wang et al, 2014	nitrogen deposition	LB (leaf biomass)	Quercus chenii	ECM	2.4	0.34	3.08	0.6	5	5
737	Wang et al, 2014	nitrogen deposition	LB (leaf biomass)	Quercus acutissima	ECM	4.49	0.54	5.48	0.6	5	5
738	Li et al, 2016	nitrogen deposition	LB (leaf biomass)	Larix olgensis	ECM	5.67	0.603738	10.39	0.64846	5	5
739	Wang et al, 2014	nitrogen deposition	LB (leaf biomass)	Quercus glandulifera	ECM	1.43	0.45	3.36	0.65	5	5
740	Zhang et al, 2019	nitrogen deposition	LB (leaf biomass)	Pinus massoniana	ECM	17.68	0.658179	20.15	0.6755	3	3
741	Zhang et al, 2013	nitrogen deposition	LB (leaf biomass)	Schima superba	AM	1.20408	0.46939	1.71429	0.7551	3	3
742	Thomas et al, 2000	nitrogen deposition	LB (leaf biomass)	Gliricidia sepium	AM	8.04	1.4376	6.75	0.779423	3	3
743	Wang et al, 2014	nitrogen deposition	LB (leaf biomass)	Quercus acutissima	ECM	4.49	0.54	5.08	0.81	5	5
744	Zhang et al, 2013	nitrogen deposition	LB (leaf biomass)	Schima superba	AM	1.20408	0.46939	1.91837	0.83673	3	3
745	Tanis et al, 2015	nitrogen deposition	LB (leaf biomass)	Fraxinus americana	AM	1.96	0.84664	2.21	0.84664	7	7
746	Wang et al, 2014	nitrogen deposition	LB (leaf biomass)	Quercus variabilis	ECM	5.4	0.3	5.28	0.85	5	5
747	Watanabe et al, 2011	nitrogen deposition	LB (leaf biomass)	Larix gmelinii	ECM	10.3	2.9	14.1	1	3	3
748	Liu et al, 2015	nitrogen deposition	LB (leaf biomass)	Schima superba	AM	45.5046	9.5413	44.4037	1.1009	6	6
749	Liu et al, 2021	nitrogen deposition	LB (leaf biomass)	Cunninghamia lanceolata	AM	9.16107	2.47629	9.66443	1.35074	5	5
750	Xu et al, 2018	nitrogen deposition	LB (leaf biomass)	Dalbergia odorifera	AM	4.12088	1.37363	6.86813	1.37363	4	4
751	Eller et al, 2011	nitrogen deposition	LB (leaf biomass)	Acer saccharum	AM	9	1.19912	7.26923	1.39896	3	3
752	Wang et al, 2016	nitrogen deposition	LB (leaf biomass)	Quercus glandulifera	ECM	7.93	2.31	19.11	1.46	7	7
753	Wang et al, 2016	nitrogen deposition	LB (leaf biomass)	Quercus glandulifera	ECM	7.93	2.31	10.46	1.63	7	7
754	Liu et al, 2015	nitrogen deposition	LB (leaf biomass)	Pinus massoniana	ECM	26.9725	7.1559	17.0642	1.6514	6	6
755	Fusaro et al, 2017	nitrogen deposition	LB (leaf biomass)	Quercus ilex	ECM	4.54	1.11	6.88	1.67	5	5
756	WangA et al, 2018	nitrogen deposition	LB (leaf biomass)	Fraxinus mandshurica	AM	12.3757	1.326	37.1271	1.7679	6	6
757	Wang et al, 2016	nitrogen deposition	LB (leaf biomass)	Quercus chenii	ECM	10.26	1.38	12.43	1.77	7	7
758	Cui et al, 2019	nitrogen deposition	LB (leaf biomass)	Fraxinus mandshurica	AM	5.55	1.575	10.8	1.875	5	5
759	Thomas et al, 2000	nitrogen deposition	LB (leaf biomass)	Gliricidia sepium	AM	8.04	1.4376	7.86	1.90526	3	3
760	Zhao et al, 2011	nitrogen deposition	LB (leaf biomass)	Populus cathayana	AM	3.51	0.223607	5.62	1.96774	5	5
761	Wang et al, 2016	nitrogen deposition	LB (leaf biomass)	Quercus chenii	ECM	10.26	1.38	13.37	2.04	7	7
762	Wang et al, 2016	nitrogen deposition	LB (leaf biomass)	Quercus fabri	ECM	4.77	1.39	10.24	2.22	7	7
763	Wang et al, 2016	nitrogen deposition	LB (leaf biomass)	Quercus variabilis	ECM	9.9	2.34	11.75	2.22	7	7
764	Wang et al, 2016	nitrogen deposition	LB (leaf biomass)	Quercus variabilis	ECM	9.9	2.34	17.37	2.32	7	7
765	Wang et al, 2016	nitrogen deposition	LB (leaf biomass)	Quercus chenii	ECM	10.26	1.38	12.14	2.36	7	7
766	Liu et al, 2015	nitrogen deposition	LB (leaf biomass)	Schima superba	AM	9.90826	5.13764	36.3303	2.5688	6	6
767	Eller et al, 2011	nitrogen deposition	LB (leaf biomass)	Tsuga canadensis	ECM	9.23077	2.99771	9	2.59808	3	3
768	WangA et al, 2018	nitrogen deposition	LB (leaf biomass)	Fraxinus mandshurica	AM	12.3757	1.326	46.8508	2.652	6	6
769	WangA et al, 2018	nitrogen deposition	LB (leaf biomass)	Fraxinus mandshurica	AM	12.3757	1.326	30.0552	2.652	6	6
770	Wang et al, 2001	nitrogen deposition	LB (leaf biomass)	Populus tremuloides	AM	12.1	1.16	17.1	2.78	4	4
771	Wang et al, 2016	nitrogen deposition	LB (leaf biomass)	Quercus glandulifera	ECM	7.93	2.31	9.99	2.85	7	7
772	Wang et al, 2016	nitrogen deposition	LB (leaf biomass)	Quercus variabilis	ECM	9.9	2.34	23.74	3.22	7	7
773	Jing et al, 2016	nitrogen deposition	LB (leaf biomass)	Fraxinus mandshurica	AM	20	3.1	28	3.3	4	4
774	Liu et al, 2015	nitrogen deposition	LB (leaf biomass)	Acacia mangium	AM	27.8899	6.9725	24.9541	3.3028	6	6
775	Wang et al, 2016	nitrogen deposition	LB (leaf biomass)	Quercus acutissima	ECM	14.37	2.14	20.43	3.32	7	7
776	Wang et al, 2016	nitrogen deposition	LB (leaf biomass)	Quercus acutissima	ECM	14.37	2.14	24.95	3.75	7	7
777	Wang et al, 2016	nitrogen deposition	LB (leaf biomass)	Quercus fabri	ECM	4.77	1.39	9.68	3.97	7	7
778	Wang et al, 2016	nitrogen deposition	LB (leaf biomass)	Quercus fabri	ECM	4.77	1.39	12.59	3.98	7	7
779	Xu et al, 2018	nitrogen deposition	LB (leaf biomass)	Dalbergia odorifera	AM	4.12088	1.37363	23.3516	4.1209	4	4
780	Liu et al, 2015	nitrogen deposition	LB (leaf biomass)	Pinus massoniana	ECM	96.3303	9.9087	6.6055	4.4037	6	6
781	Li et al, 2016	nitrogen deposition	LB (leaf biomass)	Larix kaempferi	ECM	25.61	7.75916	27.2	4.40505	5	5
782	WangA et al, 2016	nitrogen deposition	LB (leaf biomass)	Fraxinus mandshurica	AM	7.73	2.68328	16.4	4.47214	5	5
783	Cui et al, 2019	nitrogen deposition	LB (leaf biomass)	Fraxinus mandshurica	AM	5.55	1.575	10.575	4.575	5	5
784	Liu et al, 2021	nitrogen deposition	LB (leaf biomass)	Phoebe chekiangensis	AM	14	3.19445	21	4.79167	5	5
785	Wang et al, 2016	nitrogen deposition	LB (leaf biomass)	Quercus acutissima	ECM	14.37	2.14	29.94	4.88	7	7
786	Wang et al, 2001	nitrogen deposition	LB (leaf biomass)	Populus tremuloides	AM	18.7	4.66	17.4	5.56	4	4
787	WangA et al, 2016	nitrogen deposition	LB (leaf biomass)	Fraxinus mandshurica	AM	7.73	2.68328	22.9	5.59017	5	5
788	WangA et al, 2018	nitrogen deposition	LB (leaf biomass)	Fraxinus mandshurica	AM	12.3757	1.326	45.9669	5.7458	6	6
789	Rasheed et al, 2020	nitrogen deposition	LB (leaf biomass)	Pinus sylvestris	ECM	10.2	2.92	20.6	5.86	4	4
790	Cui et al, 2019	nitrogen deposition	LB (leaf biomass)	Pinus koraiensis	ECM	13.1799	5.5439	15.795	5.9623	5	5
791	Cui et al, 2019	nitrogen deposition	LB (leaf biomass)	Pinus koraiensis	ECM	13.1799	5.5439	15.3766	6.6945	5	5
792	Liu et al, 2015	nitrogen deposition	LB (leaf biomass)	Schima superba	AM	45.5046	9.5413	29.3578	6.9725	6	6
793	WangA et al, 2018	nitrogen deposition	LB (leaf biomass)	Fraxinus mandshurica	AM	12.3757	1.326	57.4586	7.0718	6	6
794	Liu et al, 2015	nitrogen deposition	LB (leaf biomass)	Ormosia pinnata	AM	40.7339	17.0643	71.5596	7.156	6	6
795	Liu et al, 2015	nitrogen deposition	LB (leaf biomass)	Ormosia pinnata	AM	66.055	7.156	46.789	7.156	6	6
796	Liu et al, 2015	nitrogen deposition	LB (leaf biomass)	Acacia mangium	AM	16.1468	8.0734	25.6881	7.7064	6	6
797	Liu et al, 2015	nitrogen deposition	LB (leaf biomass)	Pinus massoniana	ECM	26.9725	7.1559	75.9633	8.2569	6	6
798	WangA et al, 2018	nitrogen deposition	LB (leaf biomass)	Fraxinus mandshurica	AM	12.3757	1.326	52.1547	8.3978	6	6
799	Xu et al, 2018	nitrogen deposition	LB (leaf biomass)	Eucalyptus urophylla	ECM	118.033	17.486	135.519	8.743	4	4
800	Liu et al, 2015	nitrogen deposition	LB (leaf biomass)	Schima superba	AM	9.90826	5.13764	23.1193	8.8073	6	6
801	WangA et al, 2016	nitrogen deposition	LB (leaf biomass)	Fraxinus mandshurica	AM	7.73	2.68328	19.7	9.16788	5	5
802	Liu et al, 2015	nitrogen deposition	LB (leaf biomass)	Acacia mangium	AM	16.1468	8.0734	41.8349	9.1743	6	6
803	WangA et al, 2016	nitrogen deposition	LB (leaf biomass)	Fraxinus mandshurica	AM	7.73	2.68328	16.3	10.2859	5	5
804	Liu et al, 2015	nitrogen deposition	LB (leaf biomass)	Ormosia pinnata	AM	66.055	7.156	56.6972	10.4588	6	6
805	Liu et al, 2015	nitrogen deposition	LB (leaf biomass)	Ormosia pinnata	AM	40.7339	17.0643	91.3761	11.0089	6	6
806	Liu et al, 2015	nitrogen deposition	LB (leaf biomass)	Pinus massoniana	ECM	96.3303	9.9087	27.5229	11.0092	6	6
807	WangA et al, 2016	nitrogen deposition	LB (leaf biomass)	Fraxinus mandshurica	AM	7.73	2.68328	21.2	12.522	5	5
808	Liu et al, 2015	nitrogen deposition	LB (leaf biomass)	Acacia mangium	AM	27.8899	6.9725	53.945	12.844	6	6
809	Zheng et al, 2020	nitrogen deposition	LB (leaf biomass)	Pinus sylvestris	ECM	28.91	6.41942	35.73	14.3567	10	10
810	Wu et al, 2011	nitrogen deposition	LB (leaf biomass)	Cyclobalanopsis glauca	AM	64.7059	37.2032	67.6471	18.6015	10	10
811	Wu et al, 2011	nitrogen deposition	LB (leaf biomass)	Pinus massoniana	ECM	76.4706	27.9024	94.1176	18.6018	10	10
812	Xu et al, 2018	nitrogen deposition	LB (leaf biomass)	Eucalyptus urophylla	ECM	118.033	17.486	214.208	52.459	4	4
813	Wu et al, 2011	nitrogen deposition	LB (leaf biomass)	Schima superba	AM	111.765	37.201	144.118	55.8047	10	10
814	Wu et al, 2011	nitrogen deposition	LB (leaf biomass)	Elaeocarpus glabripetalus	AM	173.529	46.5045	232.353	55.8047	10	10
815	Wu et al, 2011	nitrogen deposition	LB (leaf biomass)	Liquidambar formosana	AM	217.647	55.8047	347.059	102.309	10	10
816	Pei et al, 2019	nitrogen deposition	SB (stem biomass)	Toona sinensis	ECM	0.69	0.03	0.63	0.02	10	10
817	Chang et al, 2019	nitrogen deposition	SB (stem biomass)	Castanopsis fargesii	ECM	0.0108108	0.0036036	0.0828829	0.0252251	3	3
818	Wang et al, 2017	nitrogen deposition	SB (stem biomass)	Symplocos tetagona	AM	1.68649	0.03243	3.27568	0.03243	6	6
819	Wang et al, 2017	nitrogen deposition	SB (stem biomass)	Symplocos tetagona	AM	3.08108	0.22703	3.82703	0.03243	6	6
820	Wang et al, 2017	nitrogen deposition	SB (stem biomass)	Semiliquidambar cathayensis	AM	3.08108	0.22703	3.63243	0.03243	6	6
821	Wang et al, 2017	nitrogen deposition	SB (stem biomass)	Symplocos tetagona	AM	3.11351	0.06487	2.78919	0.03243	6	6
822	Wang et al, 2017	nitrogen deposition	SB (stem biomass)	Tsoongiodendrn odorum	AM	3.11351	0.06487	3.01622	0.03243	6	6
823	Wang et al, 2017	nitrogen deposition	SB (stem biomass)	Semiliquidambar cathayensis	AM	3.11351	0.06487	3.08108	0.03243	6	6
824	Pei et al, 2019	nitrogen deposition	SB (stem biomass)	Toona sinensis	ECM	0.69	0.03	0.8	0.04	10	10
825	Pei et al, 2019	nitrogen deposition	SB (stem biomass)	Toona sinensis	ECM	0.69	0.03	1.25	0.05	10	10
826	Wang et al, 2017	nitrogen deposition	SB (stem biomass)	Symplocos tetagona	AM	3.11351	0.06487	2.36757	0.06486	6	6
827	Wang et al, 2017	nitrogen deposition	SB (stem biomass)	Tsoongiodendrn odorum	AM	1.68649	0.03243	2.04324	0.06487	6	6
828	Chang et al, 2019	nitrogen deposition	SB (stem biomass)	Cyclobalanopsis jensenniana	AM	0.0468468	0.0144145	0.299099	0.072072	3	3
829	Zhao et al, 2011	nitrogen deposition	SB (stem biomass)	Populus cathayana	AM	4.13	0.402492	3.68	0.0894427	5	5
830	Pei et al, 2019	nitrogen deposition	SB (stem biomass)	Toona sinensis	ECM	0.69	0.03	0.81	0.09	10	10
831	Wang et al, 2017	nitrogen deposition	SB (stem biomass)	Tsoongiodendrn odorum	AM	1.68649	0.03243	2.78919	0.0973	6	6
832	Hatenschwiler et al, 1997	nitrogen deposition	SB (stem biomass)	Picea abies	ECM	1.47	0.0519615	1.59	0.103923	3	3
833	Pei et al, 2019	nitrogen deposition	SB (stem biomass)	Toona sinensis	ECM	0.69	0.03	1.54	0.12	3	3
834	Wang et al, 2014	nitrogen deposition	SB (stem biomass)	Quercus glandulifera	ECM	0.69	0.18	0.52	0.13	5	5
835	Zhao et al, 2009	nitrogen deposition	SB (stem biomass)	Pinus tabulaeformis	ECM	3.85321	0.29358	4.95413	0.14678	4	4
836	Zhao et al, 2009	nitrogen deposition	SB (stem biomass)	Picea asperata	ECM	2.42202	0.14678	3.30275	0.1468	4	4
837	Hatenschwiler et al, 1997	nitrogen deposition	SB (stem biomass)	Picea abies	ECM	1.47	0.0519615	1.54	0.155885	3	3
838	Chang et al, 2019	nitrogen deposition	SB (stem biomass)	Quercus acutissima	ECM	0.263063	0.079279	0.572973	0.165766	3	3
839	Wang et al, 2014	nitrogen deposition	SB (stem biomass)	Quercus chenii	ECM	3.19	0.34	3.24	0.18	5	5
840	Wang et al, 2017	nitrogen deposition	SB (stem biomass)	Semiliquidambar cathayensis	AM	3.08108	0.22703	4.67027	0.19459	6	6
841	Wang et al, 2017	nitrogen deposition	SB (stem biomass)	Semiliquidambar cathayensis	AM	3.08108	0.22703	4.73514	0.19459	6	6
842	Wang et al, 2014	nitrogen deposition	SB (stem biomass)	Quercus fabri	ECM	1.08	0.17	1.43	0.21	5	5
843	Wang et al, 2017	nitrogen deposition	SB (stem biomass)	Tsoongiodendrn odorum	AM	1.68649	0.03243	3.6	0.22703	6	6
844	Wang et al, 2014	nitrogen deposition	SB (stem biomass)	Quercus fabri	ECM	1.08	0.17	0.6	0.23	5	5
845	Wang et al, 2014	nitrogen deposition	SB (stem biomass)	Quercus fabri	ECM	1.08	0.17	1.41	0.26	5	5
846	Ambebe et al, 2009	nitrogen deposition	SB (stem biomass)	Betula papyrifera	ECM	0.509554	0.063694	2.70701	0.28662	4	4
847	Luo et al, 2019	nitrogen deposition	SB (stem biomass)	Populus cathayana	AM	0.95	0.171464	2.3	0.293939	6	6
848	Wang et al, 2014	nitrogen deposition	SB (stem biomass)	Quercus glandulifera	ECM	0.69	0.18	1.51	0.34	5	5
849	Wang et al, 2014	nitrogen deposition	SB (stem biomass)	Quercus variabilis	ECM	2.28	0.45	3.97	0.36	5	5
850	Wang et al, 2014	nitrogen deposition	SB (stem biomass)	Quercus glandulifera	ECM	0.69	0.18	1.58	0.37	5	5
851	Ambebe et al, 2009	nitrogen deposition	SB (stem biomass)	Betula papyrifera	ECM	0.509554	0.063694	4.26752	0.41401	4	4
852	Zhang et al, 2019	nitrogen deposition	SB (stem biomass)	Gliricidia sepium	AM	5.85	0.606218	6.73	0.450333	3	3
853	Thomas et al, 2000	nitrogen deposition	SB (stem biomass)	Pinus massoniana	ECM	11.38	1.31636	13.21	0.450333	3	3
854	Wang et al, 2014	nitrogen deposition	SB (stem biomass)	Quercus variabilis	ECM	2.28	0.45	3.7	0.47	5	5
855	Wang et al, 2014	nitrogen deposition	SB (stem biomass)	Quercus chenii	ECM	2.28	0.45	3.46	0.53	5	5
856	Wang et al, 2014	nitrogen deposition	SB (stem biomass)	Quercus variabilis	ECM	3.19	0.34	2.44	0.53	5	5
857	Luo et al, 2020	nitrogen deposition	SB (stem biomass)	Populus cathayana	AM	0.95	0.171464	2.19	0.587878	6	6
858	Fusaro et al, 2017	nitrogen deposition	SB (stem biomass)	Quercus ilex	ECM	3.52	1.3	5.37	0.59	5	5
859	Euring et al, 2012	nitrogen deposition	SB (stem biomass)	Populus tremula	AM	6.67	1.58392	3.25	0.622254	8	8
860	Liberloo et al, 2006	nitrogen deposition	SB (stem biomass)	Populus nigra	AM	4.0122	0.62729	3.32927	0.627314	6	6
861	Li et al, 2016	nitrogen deposition	SB (stem biomass)	Larix olgensis	ECM	23.06	1.00623	43.05	0.693181	5	5
862	Liberloo et al, 2006	nitrogen deposition	SB (stem biomass)	Populus euramericana	ECM	2.20359	0.704057	2.97006	0.704057	6	6
863	Wang et al, 2014	nitrogen deposition	SB (stem biomass)	Quercus chenii	ECM	3.19	0.34	3.8	0.78	5	5
864	Liberloo et al, 2006	nitrogen deposition	SB (stem biomass)	Populus alba	ECM	4.08511	0.833855	2.7234	0.83388	6	6
865	Thomas et al, 2000	nitrogen deposition	SB (stem biomass)	Gliricidia sepium	AM	5.85	0.606218	5.86	0.917987	3	3
866	Wang et al, 2014	nitrogen deposition	SB (stem biomass)	Quercus acutissima	ECM	5.14	0.55	7.32	0.93	5	5
867	Wang et al, 2014	nitrogen deposition	SB (stem biomass)	Quercus acutissima	ECM	5.14	0.55	6.01	0.99	5	5
868	WangA et al, 2018	nitrogen deposition	SB (stem biomass)	Fraxinus mandshurica	AM	11.6022	1.4917	23.3702	0.9944	6	6
869	Watanabe et al, 2011	nitrogen deposition	SB (stem biomass)	Larix gmelinii	ECM	13.8	4.2	17.8	1	3	3
870	Wang et al, 2016	nitrogen deposition	SB (stem biomass)	Quercus glandulifera	ECM	6.22	0.95	4.12	1.09	7	7
871	Eller et al, 2011	nitrogen deposition	SB (stem biomass)	Acer saccharum	AM	8.85417	1.50351	7.46528	1.20281	3	3
872	Euring et al, 2012	nitrogen deposition	SB (stem biomass)	Populus trichocarpa	ECM	6.86	0.905097	5.67	1.24451	8	8
873	Wang et al, 2016	nitrogen deposition	SB (stem biomass)	Quercus fabri	ECM	2.77	0.5	5.05	1.46	7	7
874	WangA et al, 2018	nitrogen deposition	SB (stem biomass)	Fraxinus mandshurica	AM	11.6022	1.4917	19.558	1.4917	6	6
875	WangA et al, 2018	nitrogen deposition	SB (stem biomass)	Fraxinus mandshurica	AM	11.6022	1.4917	15.5801	1.4917	6	6
876	WangA et al, 2018	nitrogen deposition	SB (stem biomass)	Fraxinus mandshurica	AM	11.6022	1.4917	18.232	1.4918	6	6
877	Zhao et al, 2011	nitrogen deposition	SB (stem biomass)	Populus cathayana	AM	3.78	0.31305	4.77	1.74413	5	5
878	Wang et al, 2014	nitrogen deposition	SB (stem biomass)	Quercus acutissima	ECM	5.14	0.55	9.19	1.75	5	5
879	Wang et al, 2016	nitrogen deposition	SB (stem biomass)	Quercus fabri	ECM	2.77	0.5	6.68	1.84	7	7
880	Liu et al, 2015	nitrogen deposition	SB (stem biomass)	Pinus massoniana	ECM	44.2396	14.7466	20.7373	1.8433	6	6
881	WangA et al, 2016	nitrogen deposition	SB (stem biomass)	Fraxinus mandshurica	AM	13.6	2.2	33.8	1.9	5	5
882	Atwell et al, 2009	nitrogen deposition	SB (stem biomass)	Eucalyptus pauciflora	ECM	5.3	1.73205	7.8	1.90526	3	3
883	Wang et al, 2016	nitrogen deposition	SB (stem biomass)	Quercus glandulifera	ECM	6.22	0.95	8.09	1.97	7	7
884	Wang et al, 2016	nitrogen deposition	SB (stem biomass)	Quercus variabilis	ECM	9.52	1.11	12.07	2.05	7	7
885	Liu et al, 2015	nitrogen deposition	SB (stem biomass)	Pinus massoniana	ECM	19.8157	6.4516	19.3548	2.3042	6	6
886	Fusaro et al, 2017	nitrogen deposition	SB (stem biomass)	Fraxinus ornus	AM	6.25	1.9	8.94	2.32	5	5
887	Rasheed et al, 2020	nitrogen deposition	SB (stem biomass)	Pinus sylvestris	ECM	2.02	0.66	5.86	2.38	4	4
888	Li et al, 2016	nitrogen deposition	SB (stem biomass)	Larix kaempferi	ECM	57.69	6.64112	75.53	2.41495	5	5
889	WangA et al, 2018	nitrogen deposition	SB (stem biomass)	Fraxinus mandshurica	AM	11.6022	1.4917	20.0552	2.4862	6	6
890	Wang et al, 2016	nitrogen deposition	SB (stem biomass)	Quercus chenii	ECM	16.33	2.45	15.96	2.68	7	7
891	Xu et al, 2018	nitrogen deposition	SB (stem biomass)	Dalbergia odorifera	AM	23.3516	2.7473	34.3407	2.7472	4	4
892	Wang et al, 2016	nitrogen deposition	SB (stem biomass)	Quercus glandulifera	ECM	6.22	0.95	8.82	2.95	7	7
893	Eller et al, 2011	nitrogen deposition	SB (stem biomass)	Tsuga canadensis	ECM	14.4097	3.3077	14.4097	3.00701	3	3
894	Cui et al, 2019	nitrogen deposition	SB (stem biomass)	Fraxinus mandshurica	AM	26.8117	7.682	23.7992	3.0125	5	5
895	Wang et al, 2016	nitrogen deposition	SB (stem biomass)	Quercus fabri	ECM	2.77	0.5	13.09	3.06	7	7
896	WangA et al, 2018	nitrogen deposition	SB (stem biomass)	Fraxinus mandshurica	AM	11.6022	1.4917	11.9337	3.1492	6	6
897	WangA et al, 2016	nitrogen deposition	SB (stem biomass)	Fraxinus mandshurica	AM	13.6	2.2	61.1	3.2	5	5
898	Wang et al, 2016	nitrogen deposition	SB (stem biomass)	Quercus variabilis	ECM	9.52	1.11	17.64	3.34	7	7
899	Liu et al, 2015	nitrogen deposition	SB (stem biomass)	Pinus massoniana	ECM	44.2396	14.7466	17.9724	3.6866	6	6
900	Cui et al, 2019	nitrogen deposition	SB (stem biomass)	Pinus koraiensis	ECM	10.125	4.575	11.25	3.9	5	5
901	Wang et al, 2001	nitrogen deposition	SB (stem biomass)	Populus tremuloides	AM	15.8	2.3	23.7	4.32	4	4
902	Liu et al, 2015	nitrogen deposition	SB (stem biomass)	Acacia mangium	AM	100	13.761	126.606	4.587	6	6
903	Liu et al, 2015	nitrogen deposition	SB (stem biomass)	Schima superba	AM	55.2995	3.2258	55.7604	4.6083	6	6
904	Wang et al, 2016	nitrogen deposition	SB (stem biomass)	Quercus acutissima	ECM	25.09	3.37	33.61	4.69	7	7
905	Wang et al, 2016	nitrogen deposition	SB (stem biomass)	Quercus chenii	ECM	16.33	2.45	19.52	4.89	7	7
906	Wang et al, 2016	nitrogen deposition	SB (stem biomass)	Quercus acutissima	ECM	25.09	3.37	28.87	4.9	7	7
907	Cui et al, 2019	nitrogen deposition	SB (stem biomass)	Pinus koraiensis	ECM	10.125	4.575	10.125	5.025	5	5
908	Liu et al, 2015	nitrogen deposition	SB (stem biomass)	Schima superba	AM	35.023	6.9125	35.023	5.0692	6	6
909	Jing et al, 2016	nitrogen deposition	SB (stem biomass)	Fraxinus mandshurica	AM	69.2	5.4	101.2	5.6	4	4
910	Atwell et al, 2009	nitrogen deposition	SB (stem biomass)	Eucalyptus pauciflora	ECM	15.3	3.4641	19.5	6.58179	3	3
911	Wang et al, 2001	nitrogen deposition	SB (stem biomass)	Populus tremuloides	AM	25.8	7.06	22.2	6.64	4	4
912	Wang et al, 2016	nitrogen deposition	SB (stem biomass)	Quercus variabilis	ECM	9.52	1.11	32.08	6.75	7	7
913	Wang et al, 2016	nitrogen deposition	SB (stem biomass)	Quercus chenii	ECM	16.33	2.45	27.01	6.96	7	7
914	Cui et al, 2019	nitrogen deposition	SB (stem biomass)	Fraxinus mandshurica	AM	26.8117	7.682	24.4017	7.2301	5	5
915	Wang et al, 2016	nitrogen deposition	SB (stem biomass)	Quercus acutissima	ECM	25.09	3.37	57.97	7.7	7	7
916	Liu et al, 2015	nitrogen deposition	SB (stem biomass)	Pinus massoniana	ECM	19.8157	6.4516	76.4977	7.8341	6	6
917	Xu et al, 2018	nitrogen deposition	SB (stem biomass)	Dalbergia odorifera	AM	23.3516	2.7473	60.4396	8.2417	4	4
918	Xu et al, 2018	nitrogen deposition	SB (stem biomass)	Eucalyptus urophylla	ECM	131.148	8.743	166.12	8.743	4	4
919	Liu et al, 2015	nitrogen deposition	SB (stem biomass)	Schima superba	AM	55.2995	3.2258	70.0461	8.7557	6	6
920	Liu et al, 2015	nitrogen deposition	SB (stem biomass)	Acacia mangium	AM	94.4954	4.5872	133.945	9.174	6	6
921	WangA et al, 2016	nitrogen deposition	SB (stem biomass)	Fraxinus mandshurica	AM	13.6	2.2	35.1	9.6	5	5
922	Liu et al, 2015	nitrogen deposition	SB (stem biomass)	Schima superba	AM	35.023	6.9125	35.9447	9.6774	6	6
923	WangA et al, 2016	nitrogen deposition	SB (stem biomass)	Fraxinus mandshurica	AM	13.6	2.2	57.3	9.8	5	5
924	Liu et al, 2015	nitrogen deposition	SB (stem biomass)	Ormosia pinnata	AM	109.752	23.019	100.433	11.113	6	6
925	WangA et al, 2016	nitrogen deposition	SB (stem biomass)	Fraxinus mandshurica	AM	13.6	2.2	79.6	11.9	5	5
926	WangA et al, 2016	nitrogen deposition	SB (stem biomass)	Fraxinus mandshurica	AM	13.6	2.2	44.2	12.3	5	5
927	Xu et al, 2018	nitrogen deposition	SB (stem biomass)	Eucalyptus urophylla	ECM	131.148	8.743	240.437	13.115	4	4
928	Liu et al, 2015	nitrogen deposition	SB (stem biomass)	Ormosia pinnata	AM	109.752	23.019	112.54	13.492	6	6
929	Liu et al, 2015	nitrogen deposition	SB (stem biomass)	Ormosia pinnata	AM	117.631	19.841	120.212	13.494	6	6
930	Liu et al, 2015	nitrogen deposition	SB (stem biomass)	Ormosia pinnata	AM	117.631	19.841	95.8129	16.6671	6	6
931	Wu et al, 2011	nitrogen deposition	SB (stem biomass)	Cyclobalanopsis glauca	AM	106.294	17.6898	106.294	17.6898	10	10
932	Wu et al, 2011	nitrogen deposition	SB (stem biomass)	Pinus massoniana	ECM	83.9161	17.691	83.9161	17.691	10	10
933	Liu et al, 2015	nitrogen deposition	SB (stem biomass)	Acacia mangium	AM	94.4954	4.5872	150.459	18.348	6	6
934	Liu et al, 2015	nitrogen deposition	SB (stem biomass)	Acacia mangium	AM	100	13.761	148.624	19.266	6	6
935	Wu et al, 2011	nitrogen deposition	SB (stem biomass)	Schima superba	AM	123.077	17.6898	190.21	35.3827	10	10
936	Wu et al, 2011	nitrogen deposition	SB (stem biomass)	Elaeocarpus glabripetalus	AM	419.58	123.838	643.357	70.7623	10	10
937	Wu et al, 2011	nitrogen deposition	SB (stem biomass)	Liquidambar formosana	AM	363.636	88.4552	626.573	123.838	10	10
938	Walker et al, 1997	nitrogen deposition	SB (stem biomass)	Pinus ponderosa	ECM	619	205.941	841.9	289.252	3	3
939	Walker et al, 1997	nitrogen deposition	SB (stem biomass)	Pinus ponderosa	ECM	619	205.941	1235.8	451.026	3	3
940	Zhao et al, 2009	nitrogen deposition	CRB (coarse root biomass)	Pinus tabulaeformis	ECM	2.16738	0.17168	2.36052	0.17166	4	4
941	Zhao et al, 2009	nitrogen deposition	CRB (coarse root biomass)	Picea asperata	ECM	1.52361	0.08582	1.35193	0.17168	4	4
942	Liu et al, 2015	nitrogen deposition	CRB (coarse root biomass)	Pinus massoniana	ECM	12.5806	4.2858	6.2212	0.2765	6	6
943	Liberloo et al, 2006	nitrogen deposition	CRB (coarse root biomass)	Populus euramericana	ECM	5.94012	0.938718	6.13174	0.704032	6	6
944	Liberloo et al, 2006	nitrogen deposition	CRB (coarse root biomass)	Populus nigra	AM	5.54878	0.627314	4.69512	0.836427	6	6
945	Liu et al, 2015	nitrogen deposition	CRB (coarse root biomass)	Ormosia pinnata	AM	53.211	2.9358	55.0459	1.1009	6	6
946	Liu et al, 2015	nitrogen deposition	CRB (coarse root biomass)	Pinus massoniana	ECM	12.0276	4.2858	7.46544	1.10599	6	6
947	Liu et al, 2015	nitrogen deposition	CRB (coarse root biomass)	Pinus massoniana	ECM	12.5806	4.2858	9.40092	1.24428	6	6
948	Liu et al, 2015	nitrogen deposition	CRB (coarse root biomass)	Acacia mangium	AM	15.367	2.7523	17.4312	1.3761	6	6
949	Liberloo et al, 2006	nitrogen deposition	CRB (coarse root biomass)	Populus alba	ECM	5.19149	0.833855	5.3617	1.45928	6	6
950	Liu et al, 2015	nitrogen deposition	CRB (coarse root biomass)	Ormosia pinnata	AM	34.4954	8.4404	42.9358	1.8348	6	6
951	Tanis et al, 2015	nitrogen deposition	CRB (coarse root biomass)	Fraxinus americana	AM	4.09	1.42871	5.23	2.06369	7	7
952	Liu et al, 2015	nitrogen deposition	CRB (coarse root biomass)	Schima superba	AM	19.9078	6.2673	29.1244	2.212	6	6
953	Liu et al, 2015	nitrogen deposition	CRB (coarse root biomass)	Schima superba	AM	35.3917	9.9539	55.6682	2.212	6	6
954	Liu et al, 2015	nitrogen deposition	CRB (coarse root biomass)	Acacia mangium	AM	15.367	2.7523	17.2018	2.7523	6	6
955	Liu et al, 2015	nitrogen deposition	CRB (coarse root biomass)	Ormosia pinnata	AM	53.211	2.9358	35.5963	3.6698	6	6
956	Liu et al, 2015	nitrogen deposition	CRB (coarse root biomass)	Ormosia pinnata	AM	34.4954	8.4404	40.7339	4.4037	6	6
957	Liu et al, 2015	nitrogen deposition	CRB (coarse root biomass)	Pinus massoniana	ECM	12.0276	4.2858	21.0138	4.5622	6	6
958	Liu et al, 2015	nitrogen deposition	CRB (coarse root biomass)	Schima superba	AM	19.9078	6.2673	29.1244	5.1613	6	6
959	Jing et al, 2016	nitrogen deposition	CRB (coarse root biomass)	Fraxinus mandshurica	AM	77.3	6.2	111.7	5.3	4	4
960	Liu et al, 2015	nitrogen deposition	CRB (coarse root biomass)	Schima superba	AM	35.3917	9.9539	33.9171	5.5299	6	6
961	Liu et al, 2015	nitrogen deposition	CRB (coarse root biomass)	Acacia mangium	AM	15.367	2.7523	28.8991	6.1926	6	6
962	Walker et al, 1998	nitrogen deposition	CRB (coarse root biomass)	Pinus ponderosa	ECM	54.31	10.5319	55	6.50696	5	5
963	Wang et al, 2001	nitrogen deposition	CRB (coarse root biomass)	Populus tremuloides	AM	26.4	3.24	36	7.12	4	4
964	Wang et al, 2001	nitrogen deposition	CRB (coarse root biomass)	Populus tremuloides	AM	36.5	5.4	32.4	7.14	4	4
965	Liu et al, 2015	nitrogen deposition	CRB (coarse root biomass)	Acacia mangium	AM	15.367	2.7523	21.3303	8.4862	6	6
966	Walker et al, 1998	nitrogen deposition	CRB (coarse root biomass)	Pinus ponderosa	ECM	54.31	10.5319	59.57	12.9245	5	5
967	Vose et al, 1995	nitrogen deposition	CRB (coarse root biomass)	Pinus ponderosa	ECM	72.5	21.131	105	26.3272	3	3
968	Vose et al, 1995	nitrogen deposition	CRB (coarse root biomass)	Pinus ponderosa	ECM	72.5	21.131	108.6	44.1673	3	3
969	Jackson et al, 2009	nitrogen deposition	CRB (coarse root biomass)	Pinus taeda	ECM	295.146	53.8113	473.786	161.434	3	3
970	Lagomarsino et al, 2013	nitrogen deposition	CRB (coarse root biomass)	Populus	AM	255.184	52.7146	522.074	186.529	3	3
971	Zhao et al, 2009	nitrogen deposition	FRB (fine root biomass)	Pinus tabulaeformis	ECM	1.0177	0.0885	1.58186	0.13274	4	4
972	Zhao et al, 2009	nitrogen deposition	FRB (fine root biomass)	Picea asperata	ECM	0.497788	0.088494	0.85177	0.132744	4	4
973	Tanis et al, 2015	nitrogen deposition	FRB (fine root biomass)	Fraxinus americana	AM	0.58	0.238118	0.69	0.21166	7	7
974	Liu et al, 2015	nitrogen deposition	FRB (fine root biomass)	Pinus massoniana	ECM	3.31797	1.38249	2.35023	0.41475	6	6
975	Liu et al, 2015	nitrogen deposition	FRB (fine root biomass)	Pinus massoniana	ECM	7.74194	0.82949	2.28111	0.48387	6	6
976	Wu et al, 2019	nitrogen deposition	FRB (fine root biomass)	Ormosia pinnata	AM	3.45455	1.27272	2.36364	0.54545	4	4
977	Wu et al, 2019	nitrogen deposition	FRB (fine root biomass)	Pinus massoniana	ECM	7.81818	0.90909	2.36364	0.54545	4	4
978	Liu et al, 2015	nitrogen deposition	FRB (fine root biomass)	Ormosia pinnata	AM	18.0046	3.7844	6.99541	0.68808	6	6
979	Wu et al, 2019	nitrogen deposition	FRB (fine root biomass)	Schima superba	AM	18	3.8182	6.90909	0.72727	4	4
980	Wu et al, 2019	nitrogen deposition	FRB (fine root biomass)	Schima superba	AM	14.5455	0.909	16	0.7273	4	4
981	Liu et al, 2015	nitrogen deposition	FRB (fine root biomass)	Acacia mangium	AM	14.4954	0.9174	15.9633	0.7339	6	6
982	Wu et al, 2019	nitrogen deposition	FRB (fine root biomass)	Pinus massoniana	ECM	7.81818	0.90909	4.72727	0.90909	4	4
983	Liu et al, 2017	nitrogen deposition	FRB (fine root biomass)	Acacia mangium	AM	16.0386	0.5798	14.4928	0.9661	6	6
984	Liu et al, 2017	nitrogen deposition	FRB (fine root biomass)	Pinus massoniana	ECM	2.31884	0.38647	4.63768	0.96618	6	6
985	Liu et al, 2017	nitrogen deposition	FRB (fine root biomass)	Pinus massoniana	ECM	2.31884	0.38647	7.72947	0.96618	6	6
986	Liu et al, 2015	nitrogen deposition	FRB (fine root biomass)	Pinus massoniana	ECM	7.74194	0.82949	4.63134	0.96774	6	6
987	Wu et al, 2019	nitrogen deposition	FRB (fine root biomass)	Pinus massoniana	ECM	5.63636	2.54546	8.90909	1.09091	4	4
988	Liu et al, 2015	nitrogen deposition	FRB (fine root biomass)	Schima superba	AM	5.64516	2.30415	8.75576	1.15207	6	6
989	Liu et al, 2017	nitrogen deposition	FRB (fine root biomass)	Schima superba	AM	10.8213	2.1256	8.88889	1.15941	6	6
990	Wu et al, 2019	nitrogen deposition	FRB (fine root biomass)	Ormosia pinnata	AM	3.45455	1.27272	7.45455	1.63636	4	4
991	Liu et al, 2015	nitrogen deposition	FRB (fine root biomass)	Pinus massoniana	ECM	3.31797	1.38249	7.32719	1.65899	6	6
992	Wang et al, 2001	nitrogen deposition	FRB (fine root biomass)	Populus tremuloides	AM	4.3	0.9	5.6	1.7	4	4
993	Liu et al, 2017	nitrogen deposition	FRB (fine root biomass)	Acacia mangium	AM	16.0386	0.5798	21.6425	1.7391	6	6
994	Wu et al, 2019	nitrogen deposition	FRB (fine root biomass)	Schima superba	AM	14.5455	0.909	21.6364	1.8181	4	4
995	Liu et al, 2015	nitrogen deposition	FRB (fine root biomass)	Acacia mangium	AM	14.4954	0.9174	21.6514	1.8348	6	6
996	Walker et al, 1998	nitrogen deposition	FRB (fine root biomass)	Pinus ponderosa	ECM	6.59	2.54912	7.37	2.03482	5	5
997	Wang et al, 2001	nitrogen deposition	FRB (fine root biomass)	Populus tremuloides	AM	5.1	1.3	6.2	2.16	4	4
998	Liu et al, 2015	nitrogen deposition	FRB (fine root biomass)	Ormosia pinnata	AM	13.9908	3.5551	8.94495	2.17895	6	6
999	Wu et al, 2019	nitrogen deposition	FRB (fine root biomass)	Pinus massoniana	ECM	5.63636	2.54546	10.9091	2.1818	4	4
1000	Wu et al, 2019	nitrogen deposition	FRB (fine root biomass)	Acacia mangium	AM	14	3.6364	8.90909	2.18181	4	4
1001	Liu et al, 2015	nitrogen deposition	FRB (fine root biomass)	Schima superba	AM	5.64516	2.30415	10.7143	2.1889	6	6
1002	Liu et al, 2017	nitrogen deposition	FRB (fine root biomass)	Schima superba	AM	10.8213	2.1256	5.60386	2.51208	6	6
1003	Walker et al, 1998	nitrogen deposition	FRB (fine root biomass)	Pinus ponderosa	ECM	6.59	2.54912	5.78	2.90689	5	5
1004	Vose et al, 1995	nitrogen deposition	FRB (fine root biomass)	Pinus ponderosa	ECM	6.4	3.4641	9.5	3.2909	3	3
1005	Liu et al, 2017	nitrogen deposition	FRB (fine root biomass)	Ormosia pinnata	AM	6.95652	0.77295	15.2657	3.4783	6	6
1006	Wu et al, 2019	nitrogen deposition	FRB (fine root biomass)	Schima superba	AM	18	3.8182	15.2727	3.6364	4	4
1007	Liu et al, 2015	nitrogen deposition	FRB (fine root biomass)	Ormosia pinnata	AM	18.0046	3.7844	15.2523	3.6697	6	6
1008	WangA et al, 2016	nitrogen deposition	FRB (fine root biomass)	Fraxinus mandshurica	AM	26.1	3.3541	32.3	3.80132	5	5
1009	WangA et al, 2016	nitrogen deposition	FRB (fine root biomass)	Fraxinus mandshurica	AM	26.1	3.3541	25.4	3.80132	5	5
1010	Wu et al, 2019	nitrogen deposition	FRB (fine root biomass)	Ormosia pinnata	AM	15.6364	2	14.9091	3.8182	4	4
1011	Liu et al, 2017	nitrogen deposition	FRB (fine root biomass)	Ormosia pinnata	AM	6.95652	0.77295	17.971	3.8647	6	6
1012	Vose et al, 1995	nitrogen deposition	FRB (fine root biomass)	Pinus ponderosa	ECM	6.4	3.4641	5.2	3.98372	3	3
1013	WangA et al, 2016	nitrogen deposition	FRB (fine root biomass)	Fraxinus mandshurica	AM	26.1	3.3541	35.6	4.02492	5	5
1014	Liu et al, 2015	nitrogen deposition	FRB (fine root biomass)	Schima superba	AM	15.6682	1.8433	14.7465	4.0323	6	6
1015	WangA et al, 2016	nitrogen deposition	FRB (fine root biomass)	Fraxinus mandshurica	AM	26.1	3.3541	46.6	4.24853	5	5
1016	Jing et al, 2016	nitrogen deposition	FRB (fine root biomass)	Fraxinus mandshurica	AM	49.6	4.5	75.8	4.3	4	4
1017	Liu et al, 2015	nitrogen deposition	FRB (fine root biomass)	Acacia mangium	AM	12.2936	3.4862	31.7431	4.7707	6	6
1018	Jackson et al, 2009	nitrogen deposition	FRB (fine root biomass)	Pinus taeda	ECM	232.411	28.7534	208.893	4.79224	3	3
1019	Liu et al, 2015	nitrogen deposition	FRB (fine root biomass)	Schima superba	AM	15.6682	1.8433	16.4747	4.8387	6	6
1020	Wu et al, 2019	nitrogen deposition	FRB (fine root biomass)	Ormosia pinnata	AM	15.6364	2	16.5455	4.909	4	4
1021	Wu et al, 2019	nitrogen deposition	FRB (fine root biomass)	Acacia mangium	AM	12.1818	3.4546	31.6364	4.9091	4	4
1022	Wu et al, 2019	nitrogen deposition	FRB (fine root biomass)	Acacia mangium	AM	14	3.6364	10.7273	4.9091	4	4
1023	Liu et al, 2015	nitrogen deposition	FRB (fine root biomass)	Ormosia pinnata	AM	13.9908	3.5551	10.7798	4.9312	6	6
1024	WangA et al, 2016	nitrogen deposition	FRB (fine root biomass)	Fraxinus mandshurica	AM	26.1	3.3541	38	6.26099	5	5
1025	Wu et al, 2019	nitrogen deposition	FRB (fine root biomass)	Acacia mangium	AM	12.1818	3.4546	24.5455	8.1818	4	4
1026	WangA et al, 2016	nitrogen deposition	FRB (fine root biomass)	Fraxinus mandshurica	AM	26.1	3.3541	49.4	8.27345	5	5
1027	Liu et al, 2015	nitrogen deposition	FRB (fine root biomass)	Acacia mangium	AM	12.2936	3.4862	24.4037	8.4403	6	6
1028	Zhao et al, 2018	nitrogen deposition	FRB (fine root biomass)	Pinus tabulaeformis	ECM	81.7021	5.89642	132.766	8.84385	3	3
1029	Zhang et al, 2012	nitrogen deposition	FRB (fine root biomass)	Acacia auriculiformis	AM	92.9	23.5559	63.2	10.9119	3	3
1030	Zhang et al, 2012	nitrogen deposition	FRB (fine root biomass)	Eucalyptus citriodora	ECM	74.4	5.54256	85.8	11.0851	3	3
1031	Zhang et al, 2012	nitrogen deposition	FRB (fine root biomass)	Acacia auriculiformis	AM	92.9	23.5559	62.8	11.0851	3	3
1032	Zhao et al, 2018	nitrogen deposition	FRB (fine root biomass)	Pinus tabulaeformis	ECM	81.7021	5.89642	100.426	11.7918	3	3
1033	Zhang et al, 2012	nitrogen deposition	FRB (fine root biomass)	Eucalyptus citriodora	ECM	74.4	5.54256	87	12.4708	3	3
1034	Cao et al, 2020	nitrogen deposition	FRB (fine root biomass)	Cunninghamia lanceolata	AM	99.6	11.1	120.7	14.4	5	5
1035	Sun et al, 2014	nitrogen deposition	FRB (fine root biomass)	Larix principis-rupprechtii	ECM	79.3103	14.9315	82.7586	14.9315	3	3
1036	Zhao et al, 2018	nitrogen deposition	FRB (fine root biomass)	Pinus tabulaeformis	ECM	81.7021	5.89642	129.362	17.6877	3	3
1037	Sun et al, 2014	nitrogen deposition	FRB (fine root biomass)	Larix principis-rupprechtii	ECM	108.621	20.9041	100	23.8904	3	3
1038	Cao et al, 2020	nitrogen deposition	FRB (fine root biomass)	Cunninghamia lanceolata	AM	99.6	11.1	153	25.3	5	5
1039	Sun et al, 2014	nitrogen deposition	FRB (fine root biomass)	Larix principis-rupprechtii	ECM	170.69	23.8904	184.483	26.8767	3	3
1040	Sun et al, 2014	nitrogen deposition	FRB (fine root biomass)	Larix principis-rupprechtii	ECM	79.3103	14.9315	94.8276	29.8629	3	3
1041	Lee et al, 2003	nitrogen deposition	FRB (fine root biomass)	Populus deltoides	ECM	134.302	61.048	148.837	34.884	4	4
1042	Lee et al, 2003	nitrogen deposition	FRB (fine root biomass)	Pinus taeda	ECM	246.221	61.046	211.337	34.884	4	4
1043	Sun et al, 2014	nitrogen deposition	FRB (fine root biomass)	Larix principis-rupprechtii	ECM	170.69	23.8904	165.517	35.8355	3	3
1044	Lagomarsino et al, 2013	nitrogen deposition	FRB (fine root biomass)	Populus	AM	196	26.2694	120.167	36.3731	3	3
1045	Sun et al, 2014	nitrogen deposition	FRB (fine root biomass)	Larix principis-rupprechtii	ECM	108.621	20.9041	108.621	47.7807	3	3
1046	Lee et al, 2003	nitrogen deposition	FRB (fine root biomass)	Populus deltoides	ECM	134.302	61.048	167.733	55.232	4	4
1047	Lee et al, 2003	nitrogen deposition	FRB (fine root biomass)	Populus deltoides	ECM	246.221	61.046	225.872	55.232	4	4
1048	Lee et al, 2003	nitrogen deposition	FRB (fine root biomass)	Pinus taeda	ECM	246.221	61.046	215.698	55.232	4	4
1049	Lee et al, 2003	nitrogen deposition	FRB (fine root biomass)	Pinus taeda	ECM	134.302	61.048	143.023	55.234	4	4
1050	Drake et al, 2012	nitrogen deposition	FRB (fine root biomass)	Pinus taeda	ECM	166.124	76.1651	118.078	57.8291	3	3
1051	Zheng et al, 2020	nitrogen deposition	LM (litter mass)	Pinus sylvestris	ECM	68	16.7917	69.2	7.0835	10	10
1052	Jing et al, 2021	nitrogen deposition	LM (litter mass)	Pinus tabulaeformis	ECM	210.41	14.39	189.6	8.15	4	4
1053	Li et al, 2020	nitrogen deposition	LM (litter mass)	Pinus tabulaeformis	ECM	210.41	14.39	189.6	8.15	4	4
1054	Lagomarsino et al, 2013	nitrogen deposition	LM (litter mass)	Populus euramericana	ECM	671.09	29.5516	682.464	19.7011	3	3
1055	Jing et al, 2021	nitrogen deposition	LM (litter mass)	Pinus tabulaeformis	ECM	210.41	14.39	182.05	20.66	4	4
1056	Li et al, 2020	nitrogen deposition	LM (litter mass)	Pinus tabulaeformis	ECM	210.41	14.39	182.05	20.66	4	4
1057	Sun et al, 2014	nitrogen deposition	LM (litter mass)	Larix principis-rupprechtii	ECM	273.6	33.2554	273.6	20.7846	3	3
1058	Jing et al, 2021	nitrogen deposition	LM (litter mass)	Pinus tabulaeformis	ECM	210.41	14.39	186.69	22.22	4	4
1059	Li et al, 2020	nitrogen deposition	LM (litter mass)	Pinus tabulaeformis	ECM	210.41	14.39	186.69	22.22	4	4
1060	Zhang et al, 2012	nitrogen deposition	LM (litter mass)	Eucalyptus citriodora	ECM	377	93.5307	335	24.2487	3	3
1061	Gao et al, 2016	nitrogen deposition	LM (litter mass)	Pinus koraiensis	ECM	590.2	24.2487	477.4	24.2487	3	3
1062	Lagomarsino et al, 2013	nitrogen deposition	LM (litter mass)	Populus euramericana	ECM	671.09	29.5516	682.464	29.5516	3	3
1063	Zhao et al, 2018	nitrogen deposition	LM (litter mass)	Pinus tabulaeformis	ECM	277.05	18.4273	330.696	36.8528	3	3
1064	Lagomarsino et al, 2013	nitrogen deposition	LM (litter mass)	populus nigra	AM	498.113	49.0203	509.434	39.2162	3	3
1065	Lagomarsino et al, 2013	nitrogen deposition	LM (litter mass)	populus nigra	AM	498.113	49.0203	481.132	39.2162	3	3
1066	Gao et al, 2016	nitrogen deposition	LM (litter mass)	Pinus koraiensis	ECM	273.6	33.2554	254.4	41.5692	3	3
1067	Sun et al, 2014	nitrogen deposition	LM (litter mass)	Larix principis-rupprechtii	ECM	377	93.5307	400	41.5692	3	3
1068	Zhang et al, 2012	nitrogen deposition	LM (litter mass)	Acacia auriculiformis	AM	694.1	43.3013	745	41.5692	3	3
1069	Gao et al, 2016	nitrogen deposition	LM (litter mass)	Pinus koraiensis	ECM	377	93.5307	365	43.3013	3	3
1070	Zhao et al, 2018	nitrogen deposition	LM (litter mass)	Pinus tabulaeformis	ECM	277.05	18.4273	315.176	46.0656	3	3
1071	Zhao et al, 2018	nitrogen deposition	LM (litter mass)	Pinus tabulaeformis	ECM	277.05	18.4273	384.763	46.0656	3	3
1072	Lagomarsino et al, 2013	nitrogen deposition	LM (litter mass)	Populus alba	ECM	545.972	68.9537	551.659	49.2526	3	3
1073	Lagomarsino et al, 2013	nitrogen deposition	LM (litter mass)	Populus	AM	875.829	88.6547	927.014	49.2526	3	3
1074	Zhang et al, 2014	nitrogen deposition	LM (litter mass)	Eucalyptus urophylla	ECM	870	67	697	55	3	3
1075	Zhang et al, 2014	nitrogen deposition	LM (litter mass)	Eucalyptus urophylla	ECM	870	67	674	58	3	3
1076	Zhang et al, 2014	nitrogen deposition	LM (litter mass)	Acacia auriculiformis	AM	841	58	704	59	3	3
1077	Lagomarsino et al, 2013	nitrogen deposition	LM (litter mass)	Populus alba	ECM	803.774	78.4325	792.453	68.6284	3	3
1078	Zhang et al, 2014	nitrogen deposition	LM (litter mass)	Acacia auriculiformis	AM	841	58	846	72	3	3
1079	Li et al, 2014	nitrogen deposition	LM (litter mass)	Pinus koraiensis	ECM	264.77	10.57	382.14	76.21	4	4
1080	Zhang et al, 2012	nitrogen deposition	LM (litter mass)	Eucalyptus citriodora	ECM	590.2	24.2487	483.9	76.2102	3	3
1081	Lagomarsino et al, 2013	nitrogen deposition	LM (litter mass)	populus nigra	AM	909.953	68.9537	1080.57	78.8042	3	3
1082	Li et al, 2014	nitrogen deposition	LM (litter mass)	Pinus koraiensis	ECM	264.77	10.57	306.32	86.12	4	4
1083	Li et al, 2014	nitrogen deposition	LM (litter mass)	Pinus koraiensis	ECM	264.77	10.57	300.49	91.27	4	4
1084	Zhang et al, 2012	nitrogen deposition	LM (litter mass)	Acacia auriculiformis	AM	694.1	43.3013	668.5	96.9948	3	3
1085	Lagomarsino et al, 2013	nitrogen deposition	LM (litter mass)	Populus alba	ECM	803.774	78.4325	979.245	98.0406	3	3
1086	Lagomarsino et al, 2013	nitrogen deposition	LM (litter mass)	Populus euramericana	ECM	909.953	68.9537	927.014	118.206	3	3
1087	Zhang et al, 2017	nitrogen deposition	SOCS (soil organic carbon stocks)	Torreya grandis	AM	2.61099	0.02521	2.59524	0.0084	3	3
1088	Han et al, 2017	nitrogen deposition	SOCS (soil organic carbon stocks)	Quercus aquifolioides	ECM	12.71	0.066	6.33	0.012	3	3
1089	Zhang et al, 2017	nitrogen deposition	SOCS (soil organic carbon stocks)	Torreya grandis	AM	2.61099	0.02521	2.54585	0.02521	3	3
1090	WangA et al, 2018	nitrogen deposition	SOCS (soil organic carbon stocks)	Fraxinus mandshurica	AM	3.75	0.33708	3.48034	0.04213	6	6
1091	Li et al, 2013	nitrogen deposition	SOCS (soil organic carbon stocks)	Schima superba	AM	1.24	0.08	1.2	0.05	3	3
1092	Xu et al, 2014	nitrogen deposition	SOCS (soil organic carbon stocks)	Populus deltoides	ECM	11.5462	0.4706	11.6807	0.0672	4	4
1093	Xu et al, 2014	nitrogen deposition	SOCS (soil organic carbon stocks)	Populus deltoides	ECM	16.8571	0.1345	17.1261	0.0672	4	4
1094	WangA et al, 2018	nitrogen deposition	SOCS (soil organic carbon stocks)	Fraxinus mandshurica	AM	3.75	0.33708	3.30337	0.06742	6	6
1095	Li et al, 2013	nitrogen deposition	SOCS (soil organic carbon stocks)	Schima superba	AM	1.24	0.08	1.25	0.09	3	3
1096	Liu et al, 2018	nitrogen deposition	SOCS (soil organic carbon stocks)	Pinus tabuliformis	ECM	3.73799	0.17467	3.31878	0.1048	6	6
1097	Han et al, 2017	nitrogen deposition	SOCS (soil organic carbon stocks)	Quercus aquifolioides	ECM	12.71	0.066	12.35	0.113	3	3
1098	Chen et al, 2018	nitrogen deposition	SOCS (soil organic carbon stocks)	Pinus tabulaeformis	ECM	14.2034	0.1186	15.5085	0.1186	3	3
1099	Xu et al, 2014	nitrogen deposition	SOCS (soil organic carbon stocks)	Populus deltoides	ECM	12.7563	0.3361	12.8908	0.1344	4	4
1100	Xu et al, 2014	nitrogen deposition	SOCS (soil organic carbon stocks)	Populus deltoides	ECM	16.9916	0.3361	17.1261	0.1344	4	4
1101	Xu et al, 2014	nitrogen deposition	SOCS (soil organic carbon stocks)	Populus deltoides	ECM	10.8739	0.3362	10.8739	0.1345	4	4
1102	Xu et al, 2014	nitrogen deposition	SOCS (soil organic carbon stocks)	Populus deltoides	ECM	10.8739	0.3362	10.605	0.1345	4	4
1103	Xu et al, 2014	nitrogen deposition	SOCS (soil organic carbon stocks)	Populus deltoides	ECM	10.8739	0.3362	10.8067	0.1345	4	4
1104	Xu et al, 2014	nitrogen deposition	SOCS (soil organic carbon stocks)	Populus deltoides	ECM	11.5462	0.4706	11.5462	0.1345	4	4
1105	Xu et al, 2014	nitrogen deposition	SOCS (soil organic carbon stocks)	Populus deltoides	ECM	12.7563	0.3361	12.8235	0.1345	4	4
1106	Xu et al, 2014	nitrogen deposition	SOCS (soil organic carbon stocks)	Populus deltoides	ECM	12.7563	0.3361	12.7563	0.1345	4	4
1107	Xu et al, 2014	nitrogen deposition	SOCS (soil organic carbon stocks)	Populus deltoides	ECM	13.0252	0.1345	13.0252	0.1345	4	4
1108	Xu et al, 2014	nitrogen deposition	SOCS (soil organic carbon stocks)	Populus deltoides	ECM	13.0252	0.1345	13.0924	0.1345	4	4
1109	Xu et al, 2014	nitrogen deposition	SOCS (soil organic carbon stocks)	Populus deltoides	ECM	13.0252	0.1345	13.2941	0.1345	4	4
1110	Xu et al, 2014	nitrogen deposition	SOCS (soil organic carbon stocks)	Populus deltoides	ECM	16.8571	0.1345	16.8571	0.1345	4	4
1111	Xu et al, 2014	nitrogen deposition	SOCS (soil organic carbon stocks)	Populus deltoides	ECM	17.1261	0.4033	17.0588	0.1345	4	4
1112	Liu et al, 2018	nitrogen deposition	SOCS (soil organic carbon stocks)	Pinus tabuliformis	ECM	3.73799	0.17467	3.56332	0.13974	6	6
1113	WangA et al, 2018	nitrogen deposition	SOCS (soil organic carbon stocks)	Fraxinus mandshurica	AM	3.75	0.33708	3.99438	0.16011	6	6
1114	Han et al, 2017	nitrogen deposition	SOCS (soil organic carbon stocks)	Quercus aquifolioides	ECM	12.71	0.066	18.26	0.167	3	3
1115	Zhu et al, 2017	nitrogen deposition	SOCS (soil organic carbon stocks)	Larix principis-rupprechtii	ECM	20	0.069282	19.8	0.173205	3	3
1116	Zhu et al, 2017	nitrogen deposition	SOCS (soil organic carbon stocks)	Larix principis-rupprechtii	ECM	20	0.069282	19.9	0.173205	3	3
1117	Zhu et al, 2017	nitrogen deposition	SOCS (soil organic carbon stocks)	Larix principis-rupprechtii	ECM	20	0.069282	20	0.173205	3	3
1118	Liu et al, 2018	nitrogen deposition	SOCS (soil organic carbon stocks)	Pinus tabuliformis	ECM	3.73799	0.17467	3.77293	0.17467	6	6
1119	Liu et al, 2018	nitrogen deposition	SOCS (soil organic carbon stocks)	Pinus tabuliformis	ECM	3.73799	0.17467	3.73799	0.17467	6	6
1120	Liu et al, 2018	nitrogen deposition	SOCS (soil organic carbon stocks)	Pinus tabuliformis	ECM	6.0786	0.31441	6.18341	0.17467	6	6
1121	Liu et al, 2018	nitrogen deposition	SOCS (soil organic carbon stocks)	Pinus tabuliformis	ECM	3.73799	0.17467	3.84279	0.17468	6	6
1122	WangA et al, 2018	nitrogen deposition	SOCS (soil organic carbon stocks)	Fraxinus mandshurica	AM	3.75	0.33708	3.4382	0.17697	6	6
1123	Chen et al, 2018	nitrogen deposition	SOCS (soil organic carbon stocks)	Pinus tabulaeformis	ECM	8.0339	0.29661	7.32203	0.17797	3	3
1124	Li et al, 2013	nitrogen deposition	SOCS (soil organic carbon stocks)	Pinus massoniana	ECM	2.27	0.23	2.32	0.19	3	3
1125	Li et al, 2013	nitrogen deposition	SOCS (soil organic carbon stocks)	Pinus massoniana	ECM	2.27	0.23	2.15	0.2	3	3
1126	Liu et al, 2007	nitrogen deposition	SOCS (soil organic carbon stocks)	Larix gmelinii	ECM	6.13	0.363731	6.27	0.207846	3	3
1127	Fan et al, 2007	nitrogen deposition	SOCS (soil organic carbon stocks)	Cunninghamia lanceolata	AM	32.9668	0.2083	31.285	0.2083	3	3
1128	Fan et al, 2007	nitrogen deposition	SOCS (soil organic carbon stocks)	Cunninghamia lanceolata	AM	32.9668	0.2083	30.8532	0.2084	3	3
1129	Liu et al, 2018	nitrogen deposition	SOCS (soil organic carbon stocks)	Pinus tabuliformis	ECM	6.0786	0.31441	6.53275	0.20961	6	6
1130	WangA et al, 2018	nitrogen deposition	SOCS (soil organic carbon stocks)	Fraxinus mandshurica	AM	3.75	0.33708	3.48034	0.21067	6	6
1131	Chen et al, 2018	nitrogen deposition	SOCS (soil organic carbon stocks)	Pinus tabulaeformis	ECM	10.1695	0.178	9.39831	0.23728	3	3
1132	Chen et al, 2018	nitrogen deposition	SOCS (soil organic carbon stocks)	Pinus tabulaeformis	ECM	8.0339	0.29661	8.98305	0.23729	3	3
1133	WangA et al, 2018	nitrogen deposition	SOCS (soil organic carbon stocks)	Fraxinus mandshurica	AM	3.75	0.33708	3.37079	0.24438	6	6
1134	Zhou et al, 2018	nitrogen deposition	SOCS (soil organic carbon stocks)	Liquidambar formosana	AM	9.23	0.952628	9.77	0.259808	3	3
1135	Xu et al, 2014	nitrogen deposition	SOCS (soil organic carbon stocks)	Populus deltoides	ECM	10.8739	0.3362	10.7395	0.2689	4	4
1136	Xu et al, 2014	nitrogen deposition	SOCS (soil organic carbon stocks)	Populus deltoides	ECM	11.479	0.2017	11.6807	0.2689	4	4
1137	Xu et al, 2014	nitrogen deposition	SOCS (soil organic carbon stocks)	Populus deltoides	ECM	11.5462	0.4706	11.5462	0.2689	4	4
1138	Xu et al, 2014	nitrogen deposition	SOCS (soil organic carbon stocks)	Populus deltoides	ECM	13.563	0.2689	13.6975	0.2689	4	4
1139	Xu et al, 2014	nitrogen deposition	SOCS (soil organic carbon stocks)	Populus deltoides	ECM	13.563	0.2689	13.7647	0.2689	4	4
1140	Xu et al, 2014	nitrogen deposition	SOCS (soil organic carbon stocks)	Populus deltoides	ECM	13.563	0.2689	13.7647	0.2689	4	4
1141	Xu et al, 2014	nitrogen deposition	SOCS (soil organic carbon stocks)	Populus deltoides	ECM	16.8571	0.1345	17.2605	0.2689	4	4
1142	Xu et al, 2014	nitrogen deposition	SOCS (soil organic carbon stocks)	Populus deltoides	ECM	16.9916	0.3361	17.395	0.2689	4	4
1143	Xu et al, 2014	nitrogen deposition	SOCS (soil organic carbon stocks)	Populus deltoides	ECM	17.1261	0.4033	17.1933	0.2689	4	4
1144	Liu et al, 2018	nitrogen deposition	SOCS (soil organic carbon stocks)	Pinus tabuliformis	ECM	6.0786	0.31441	5.869	0.27947	6	6
1145	Liu et al, 2018	nitrogen deposition	SOCS (soil organic carbon stocks)	Pinus tabuliformis	ECM	6.0786	0.31441	6.49782	0.27947	6	6
1146	Liu et al, 2018	nitrogen deposition	SOCS (soil organic carbon stocks)	Pinus tabuliformis	ECM	6.0786	0.31441	5.90393	0.27948	6	6
1147	LiB et al, 2019	nitrogen deposition	SOCS (soil organic carbon stocks)	Pinus tabulaeformis	ECM	5.70033	0.32573	7.49186	0.32573	4	4
1148	Huang et al, 2016	nitrogen deposition	SOCS (soil organic carbon stocks)	Pinus massoniana	ECM	43.99	3.59	47.35	0.33	6	6
1149	Dong et al, 2015	nitrogen deposition	SOCS (soil organic carbon stocks)	Cunninghamia lanceolata	AM	21.6	1.67705	24.3	0.33541	5	5
1150	Xu et al, 2014	nitrogen deposition	SOCS (soil organic carbon stocks)	Populus deltoides	ECM	11.479	0.2017	11.6807	0.3361	4	4
1151	Xu et al, 2014	nitrogen deposition	SOCS (soil organic carbon stocks)	Populus deltoides	ECM	17.1261	0.4033	17.1261	0.3361	4	4
1152	Xu et al, 2014	nitrogen deposition	SOCS (soil organic carbon stocks)	Populus deltoides	ECM	17.1261	0.4033	17.4622	0.3361	4	4
1153	Xu et al, 2014	nitrogen deposition	SOCS (soil organic carbon stocks)	Populus deltoides	ECM	11.5462	0.4706	11.5462	0.3362	4	4
1154	Xu et al, 2014	nitrogen deposition	SOCS (soil organic carbon stocks)	Populus deltoides	ECM	13.563	0.2689	13.8319	0.3362	4	4
1155	Zhang et al, 2012	nitrogen deposition	SOCS (soil organic carbon stocks)	Acacia auriculiformis	AM	22.1	3.98372	21.4	0.34641	3	3
1156	Chen et al, 2018	nitrogen deposition	SOCS (soil organic carbon stocks)	Pinus tabulaeformis	ECM	10.1695	0.178	10.5847	0.356	3	3
1157	Tafazoli et al, 2019	nitrogen deposition	SOCS (soil organic carbon stocks)	Acer velutinum	AM	3.94	0.44	4.08	0.37	3	3
1158	Liu et al, 2007	nitrogen deposition	SOCS (soil organic carbon stocks)	Larix gmelinii	ECM	6.13	0.363731	6.33	0.381051	3	3
1159	Xu et al, 2014	nitrogen deposition	SOCS (soil organic carbon stocks)	Populus deltoides	ECM	11.479	0.2017	11.8824	0.4033	4	4
1160	Zhu et al, 2019	nitrogen deposition	SOCS (soil organic carbon stocks)	Populus deltoides	ECM	37.194	3.7612	54.1194	0.4179	5	5
1161	Liu et al, 2015	nitrogen deposition	SOCS (soil organic carbon stocks)	Pinus tabulaeformis	ECM	4.28	0.48	5.39	0.45	3	3
1162	Yang et al, 2020	nitrogen deposition	SOCS (soil organic carbon stocks)	Pinus tabulaeformis	ECM	37.21	0.415692	35.71	0.467654	3	3
1163	Xu et al, 2014	nitrogen deposition	SOCS (soil organic carbon stocks)	Populus deltoides	ECM	11.479	0.2017	11.8824	0.4705	4	4
1164	Xu et al, 2014	nitrogen deposition	SOCS (soil organic carbon stocks)	Populus deltoides	ECM	16.9916	0.3361	17.395	0.4705	4	4
1165	Xu et al, 2014	nitrogen deposition	SOCS (soil organic carbon stocks)	Populus deltoides	ECM	12.7563	0.3361	12.958	0.4706	4	4
1166	Xu et al, 2014	nitrogen deposition	SOCS (soil organic carbon stocks)	Populus deltoides	ECM	13.0252	0.1345	13.0252	0.4706	4	4
1167	Xu et al, 2014	nitrogen deposition	SOCS (soil organic carbon stocks)	Populus deltoides	ECM	16.9916	0.3361	17.1933	0.4706	4	4
1168	Chen et al, 2018	nitrogen deposition	SOCS (soil organic carbon stocks)	Pinus tabulaeformis	ECM	14.2034	0.1186	12.3644	0.4746	3	3
1169	LiB et al, 2019	nitrogen deposition	SOCS (soil organic carbon stocks)	Pinus tabulaeformis	ECM	5.70033	0.32573	6.02606	0.4886	4	4
1170	LiB et al, 2019	nitrogen deposition	SOCS (soil organic carbon stocks)	Pinus tabulaeformis	ECM	5.70033	0.32573	7.32899	0.4886	4	4
1171	Zhang et al, 2017	nitrogen deposition	SOCS (soil organic carbon stocks)	Cunninghamia lanceolata	AM	14.2	1.9	12.4	0.5	3	3
1172	Zhang et al, 2017	nitrogen deposition	SOCS (soil organic carbon stocks)	Cunninghamia lanceolata	AM	14.2	1.9	12.8	0.5	3	3
1173	Liu et al, 2007	nitrogen deposition	SOCS (soil organic carbon stocks)	Larix gmelinii	ECM	6.13	0.363731	6.9	0.502295	3	3
1174	Yang et al, 2020	nitrogen deposition	SOCS (soil organic carbon stocks)	Pinus tabulaeformis	ECM	37.21	0.415692	39.73	0.502295	3	3
1175	Zhu et al, 2016	nitrogen deposition	SOCS (soil organic carbon stocks)	Acacia auriculiformis	AM	23.8	2.94449	23.3	0.519615	3	3
1176	Fan et al, 2007	nitrogen deposition	SOCS (soil organic carbon stocks)	Cunninghamia lanceolata	AM	20.7459	1.0633	19.5516	0.5316	3	3
1177	Zhou et al, 2018	nitrogen deposition	SOCS (soil organic carbon stocks)	Alnus cremastogyne	ECM	11.43	0.363731	10.57	0.536936	3	3
1178	Xu et al, 2014	nitrogen deposition	SOCS (soil organic carbon stocks)	Populus deltoides	ECM	16.8571	0.1345	16.9916	0.5378	4	4
1179	Liu et al, 2015	nitrogen deposition	SOCS (soil organic carbon stocks)	Pinus tabulaeformis	ECM	4.28	0.48	4.83	0.55	3	3
1180	Zhou et al, 2018	nitrogen deposition	SOCS (soil organic carbon stocks)	Liquidambar formosana	AM	9.23	0.952628	8.67	0.554256	3	3
1181	Tafazoli et al, 2019	nitrogen deposition	SOCS (soil organic carbon stocks)	Acer velutinum	AM	3.94	0.44	3.85	0.56	3	3
1182	Feng et al, 2019	nitrogen deposition	SOCS (soil organic carbon stocks)	Acacia auriculiformis	AM	28.4874	1.12743	28.4874	0.563713	5	5
1183	Li et al, 2019	nitrogen deposition	SOCS (soil organic carbon stocks)	Pinus sylvestris	ECM	3.56	0.44	4.47	0.58	4	4
1184	Liu et al, 2015	nitrogen deposition	SOCS (soil organic carbon stocks)	Pinus tabulaeformis	ECM	4.28	0.48	5.35	0.58	3	3
1185	Liu et al, 2015	nitrogen deposition	SOCS (soil organic carbon stocks)	Pinus tabulaeformis	ECM	4.47	0.45	5.65	0.59	3	3
1186	Yu et al, 2021	nitrogen deposition	SOCS (soil organic carbon stocks)	Populus deltoides	ECM	15.51	2.0265	15.27	0.606218	3	3
1187	Fan et al, 2007	nitrogen deposition	SOCS (soil organic carbon stocks)	Cunninghamia lanceolata	AM	19.0675	0.5316	14.3517	0.6202	3	3
1188	Fan et al, 2007	nitrogen deposition	SOCS (soil organic carbon stocks)	Cunninghamia lanceolata	AM	29.0698	0.6203	26.1034	0.6202	3	3
1189	Liu et al, 2015	nitrogen deposition	SOCS (soil organic carbon stocks)	Pinus tabulaeformis	ECM	4.47	0.45	4.92	0.64	3	3
1190	Chen et al, 2018	nitrogen deposition	SOCS (soil organic carbon stocks)	Pinus tabulaeformis	ECM	14.2034	0.1186	14.6186	0.6526	3	3
1191	Shang et al, 2020	nitrogen deposition	SOCS (soil organic carbon stocks)	Pinus armandii	ECM	21.0041	0.6579	28.2726	0.6579	3	3
1192	Shang et al, 2020	nitrogen deposition	SOCS (soil organic carbon stocks)	Pinus yunnanensis	ECM	21.0041	0.6579	28.3359	0.6579	3	3
1193	Shang et al, 2020	nitrogen deposition	SOCS (soil organic carbon stocks)	Quercus semicarpifolia	ECM	23.2836	0.6579	16.0784	0.6579	3	3
1194	Shang et al, 2020	nitrogen deposition	SOCS (soil organic carbon stocks)	Quercus semicarpifolia	ECM	23.2836	0.6579	29.3016	0.6579	3	3
1195	Shang et al, 2020	nitrogen deposition	SOCS (soil organic carbon stocks)	Quercus semicarpifolia	ECM	37.4051	0.6579	24.9705	0.6579	3	3
1196	Shang et al, 2020	nitrogen deposition	SOCS (soil organic carbon stocks)	Quercus semicarpifolia	ECM	39.8617	1.3158	55.0249	0.6579	3	3
1197	Shang et al, 2020	nitrogen deposition	SOCS (soil organic carbon stocks)	Pinus yunnanensis	ECM	39.8617	1.3158	53.7428	0.6579	3	3
1198	Shang et al, 2020	nitrogen deposition	SOCS (soil organic carbon stocks)	Pinus yunnanensis	ECM	39.8617	1.3158	61.0113	0.6579	3	3
1199	Shang et al, 2020	nitrogen deposition	SOCS (soil organic carbon stocks)	Pinus yunnanensis	ECM	47.4507	0.6579	37.616	0.6579	3	3
1200	Shang et al, 2020	nitrogen deposition	SOCS (soil organic carbon stocks)	Pinus armandii	ECM	47.4507	0.6579	32.3844	0.6579	3	3
1201	Shang et al, 2020	nitrogen deposition	SOCS (soil organic carbon stocks)	Pinus yunnanensis	ECM	47.4507	0.6579	35.7013	0.6579	3	3
1202	Yu et al, 2021	nitrogen deposition	SOCS (soil organic carbon stocks)	Populus deltoides	ECM	15.51	2.0265	15.12	0.6755	3	3
1203	Liu et al, 2015	nitrogen deposition	SOCS (soil organic carbon stocks)	Pinus tabulaeformis	ECM	4.47	0.45	5.32	0.7	3	3
1204	Zhang et al, 2017	nitrogen deposition	SOCS (soil organic carbon stocks)	Cunninghamia lanceolata	AM	9.5	0.3	10.1	0.7	3	3
1205	Zhao et al, 2014	nitrogen deposition	SOCS (soil organic carbon stocks)	Picea asperata	ECM	32.8	1	31.2	0.7	4	4
1206	Fan et al, 2007	nitrogen deposition	SOCS (soil organic carbon stocks)	Cunninghamia lanceolata	AM	20.7459	1.0633	19.7942	0.7088	3	3
1207	Rodriguez et al, 2014	nitrogen deposition	SOCS (soil organic carbon stocks)	Fagus grandifolia	ECM	3.71	1.07778	4.54	0.710352	6	6
1208	Rodriguez et al, 2014	nitrogen deposition	SOCS (soil organic carbon stocks)	Quercus rubra	ECM	4.39	0.563383	4.27	0.710352	6	6
1209	Jiao et al, 2021	nitrogen deposition	SOCS (soil organic carbon stocks)	Cunninghamia lanceolata	AM	10.24	1.34	8.67	0.74	3	3
1210	Zhao et al, 2016	nitrogen deposition	SOCS (soil organic carbon stocks)	Pinus sylvestris	ECM	3.31	0.72	3.81	0.76	4	4
1211	Li et al, 2019	nitrogen deposition	SOCS (soil organic carbon stocks)	Pinus sylvestris	ECM	4.65	0.22	4.93	0.76	3	3
1212	Zhao et al, 2016	nitrogen deposition	SOCS (soil organic carbon stocks)	Pinus sylvestris	ECM	4.88	0.29	5.98	0.76	3	3
1213	Jing et al, 2021	nitrogen deposition	SOCS (soil organic carbon stocks)	Pinus tabulaeformis	ECM	19.92	0.6	22.78	0.77	4	4
1214	Li et al, 2020	nitrogen deposition	SOCS (soil organic carbon stocks)	Pinus tabulaeformis	ECM	19.92	0.6	22.78	0.77	4	4
1215	Chen et al, 2018	nitrogen deposition	SOCS (soil organic carbon stocks)	Pinus tabulaeformis	ECM	8.0339	0.29661	7.79661	0.77119	3	3
1216	Fan et al, 2007	nitrogen deposition	SOCS (soil organic carbon stocks)	Cunninghamia lanceolata	AM	19.0675	0.5316	15.4808	0.7974	3	3
1217	Zhang et al, 2017	nitrogen deposition	SOCS (soil organic carbon stocks)	Cunninghamia lanceolata	AM	9.5	0.3	11	0.8	3	3
1218	Huang et al, 2016	nitrogen deposition	SOCS (soil organic carbon stocks)	Pinus massoniana	ECM	43.99	3.59	47.53	0.81	6	6
1219	Yu et al, 2021	nitrogen deposition	SOCS (soil organic carbon stocks)	Populus deltoides	ECM	17.15	0.363731	15.68	0.814064	3	3
1220	Chen et al, 2018	nitrogen deposition	SOCS (soil organic carbon stocks)	Pinus tabulaeformis	ECM	10.1695	0.178	9.63559	0.83051	3	3
1221	Zhang et al, 2014	nitrogen deposition	SOCS (soil organic carbon stocks)	Ginkgo biloba	AM	15.7	1.351	14.59	0.848705	3	3
1222	Yu et al, 2021	nitrogen deposition	SOCS (soil organic carbon stocks)	Populus deltoides	ECM	17.15	0.363731	15.42	0.917987	3	3
1223	Zhou et al, 2018	nitrogen deposition	SOCS (soil organic carbon stocks)	Alnus cremastogyne	ECM	11.43	0.363731	10.97	0.952628	3	3
1224	Huang et al, 2016	nitrogen deposition	SOCS (soil organic carbon stocks)	Schima superba	AM	46.09	7.94	54.09	0.96	6	6
1225	Fan et al, 2007	nitrogen deposition	SOCS (soil organic carbon stocks)	Cunninghamia lanceolata	AM	19.0675	0.5316	17.9383	0.9747	3	3
1226	Fan et al, 2007	nitrogen deposition	SOCS (soil organic carbon stocks)	Cunninghamia lanceolata	AM	29.0698	0.6203	24.7086	0.9747	3	3
1227	Yao et al, 2017	nitrogen deposition	SOCS (soil organic carbon stocks)	Pinus tabulaeformis	ECM	12.8535	0.8226	14.2931	0.9768	3	3
1228	MaB et al, 2018	nitrogen deposition	SOCS (soil organic carbon stocks)	Cunninghamia lanceolata	AM	17.1	1.03923	18.3	1.03923	3	3
1229	MaB et al, 2018	nitrogen deposition	SOCS (soil organic carbon stocks)	Cunninghamia lanceolata	AM	17.1	1.03923	23.1	1.03923	3	3
1230	Yang et al, 2020	nitrogen deposition	SOCS (soil organic carbon stocks)	Pinus tabulaeformis	ECM	37.21	0.415692	21.67	1.03923	3	3
1231	Fan et al, 2007	nitrogen deposition	SOCS (soil organic carbon stocks)	Cunninghamia lanceolata	AM	31.0887	0.8333	23.7668	1.0417	3	3
1232	Dorr et al, 2010	nitrogen deposition	SOCS (soil organic carbon stocks)	Picea abies	ECM	15.9	3.80132	13.8	1.11803	5	5
1233	Feng et al, 2019	nitrogen deposition	SOCS (soil organic carbon stocks)	Acacia auriculiformis	AM	22.437	1.12743	22.437	1.12743	5	5
1234	Feng et al, 2019	nitrogen deposition	SOCS (soil organic carbon stocks)	Acacia auriculiformis	AM	30	1.12743	31.2605	1.12743	5	5
1235	LiB et al, 2019	nitrogen deposition	SOCS (soil organic carbon stocks)	Pinus tabulaeformis	ECM	15.5537	1.2215	16.3681	1.14	4	4
1236	Fan et al, 2007	nitrogen deposition	SOCS (soil organic carbon stocks)	Cunninghamia lanceolata	AM	29.0698	0.6203	28.1183	1.1519	3	3
1237	Huang et al, 2016	nitrogen deposition	SOCS (soil organic carbon stocks)	Schima superba	AM	35.42	4.18	39.73	1.17	6	6
1238	ParkB et al, 2018	nitrogen deposition	SOCS (soil organic carbon stocks)	Pinus koraiensis	ECM	9.7561	1.8293	10.9756	1.2195	3	3
1239	ParkB et al, 2018	nitrogen deposition	SOCS (soil organic carbon stocks)	Pinus koraiensis	ECM	29.2683	3.6585	81.0976	1.2195	3	3
1240	ParkB et al, 2018	nitrogen deposition	SOCS (soil organic carbon stocks)	Quercus acutissima	ECM	12.8049	1.8292	7.92683	1.21951	3	3
1241	ParkB et al, 2018	nitrogen deposition	SOCS (soil organic carbon stocks)	Quercus acutissima	ECM	6.09756	2.43903	7.31707	1.21952	3	3
1242	ParkB et al, 2018	nitrogen deposition	SOCS (soil organic carbon stocks)	Pinus koraiensis	ECM	7.92683	1.82927	5.4878	1.21952	3	3
1243	LiB et al, 2019	nitrogen deposition	SOCS (soil organic carbon stocks)	Pinus tabulaeformis	ECM	15.5537	1.2215	19.2997	1.2215	4	4
1244	Li et al, 2020	nitrogen deposition	SOCS (soil organic carbon stocks)	Larix principis-rupprechtii	ECM	17.61	1.98	19.13	1.24	3	3
1245	Fan et al, 2007	nitrogen deposition	SOCS (soil organic carbon stocks)	Cunninghamia lanceolata	AM	20.7459	1.0633	17.8908	1.2405	3	3
1246	LiB et al, 2019	nitrogen deposition	SOCS (soil organic carbon stocks)	Pinus tabulaeformis	ECM	15.5537	1.2215	20.5212	1.3029	4	4
1247	Shang et al, 2020	nitrogen deposition	SOCS (soil organic carbon stocks)	Pinus armandii	ECM	21.0041	0.6579	32.9095	1.3158	3	3
1248	Shang et al, 2020	nitrogen deposition	SOCS (soil organic carbon stocks)	Quercus semicarpifolia	ECM	23.2836	0.6579	16.77	1.3158	3	3
1249	Shang et al, 2020	nitrogen deposition	SOCS (soil organic carbon stocks)	Pinus yunnanensis	ECM	29.3817	1.3158	43.8871	1.3158	3	3
1250	Shang et al, 2020	nitrogen deposition	SOCS (soil organic carbon stocks)	Pinus armandii	ECM	29.3817	1.3158	40.6292	1.3158	3	3
1251	Shang et al, 2020	nitrogen deposition	SOCS (soil organic carbon stocks)	Pinus armandii	ECM	29.3817	1.3158	32.1082	1.3158	3	3
1252	Shang et al, 2020	nitrogen deposition	SOCS (soil organic carbon stocks)	Pinus armandii	ECM	37.4051	0.6579	55.8599	1.3158	3	3
1253	Shang et al, 2020	nitrogen deposition	SOCS (soil organic carbon stocks)	Quercus semicarpifolia	ECM	37.4051	0.6579	49.3463	1.3158	3	3
1254	Li et al, 2020	nitrogen deposition	SOCS (soil organic carbon stocks)	Larix principis-rupprechtii	ECM	20.28	2.15	21.28	1.32	3	3
1255	Yao et al, 2017	nitrogen deposition	SOCS (soil organic carbon stocks)	Pinus tabulaeformis	ECM	14.91	1.1311	15.5784	1.3368	3	3
1256	Zhang et al, 2012	nitrogen deposition	SOCS (soil organic carbon stocks)	Eucalyptus citriodora	ECM	15.5	1.55885	16.1	1.38564	3	3
1257	Yao et al, 2017	nitrogen deposition	SOCS (soil organic carbon stocks)	Pinus tabulaeformis	ECM	14.3445	0.6684	16.9152	1.3881	3	3
1258	Zhao et al, 2014	nitrogen deposition	SOCS (soil organic carbon stocks)	Abies faxoniana	ECM	26.7	1.4	30.6	1.4	4	4
1259	Guo et al, 2013	nitrogen deposition	SOCS (soil organic carbon stocks)	Piuns tabulaeformis	ECM	22.9	1.14039	23.5	1.40872	5	5
1260	Jiao et al, 2021	nitrogen deposition	SOCS (soil organic carbon stocks)	Cunninghamia lanceolata	AM	14.29	1.02	12.04	1.42	3	3
1261	LiB et al, 2019	nitrogen deposition	SOCS (soil organic carbon stocks)	Quercus mongolica	ECM	51.2887	1.4433	57.7835	1.4433	3	3
1262	LiB et al, 2019	nitrogen deposition	SOCS (soil organic carbon stocks)	Quercus mongolica	ECM	51.2887	1.4433	52.0103	1.4433	3	3
1263	Jiao et al, 2021	nitrogen deposition	SOCS (soil organic carbon stocks)	Cunninghamia lanceolata	AM	14.29	1.02	12.71	1.52	3	3
1264	Zheng et al, 2015	nitrogen deposition	SOCS (soil organic carbon stocks)	Pinus massoniana	ECM	20.1	4.24853	23.9	1.56525	5	5
1265	Dong et al, 2018	nitrogen deposition	SOCS (soil organic carbon stocks)	Cunninghamia lanceolata	AM	19	0.623538	16.4	1.57617	3	3
1266	Zhang et al, 2014	nitrogen deposition	SOCS (soil organic carbon stocks)	Ginkgo biloba	AM	15.7	1.351	12.86	1.59349	3	3
1267	Jing et al, 2021	nitrogen deposition	SOCS (soil organic carbon stocks)	Pinus tabulaeformis	ECM	19.92	0.6	21.34	1.62	4	4
1268	Li et al, 2020	nitrogen deposition	SOCS (soil organic carbon stocks)	Pinus tabulaeformis	ECM	19.92	0.6	21.34	1.62	4	4
1269	Jing et al, 2021	nitrogen deposition	SOCS (soil organic carbon stocks)	Pinus tabulaeformis	ECM	19.92	0.6	20.78	1.64	4	4
1270	Li et al, 2020	nitrogen deposition	SOCS (soil organic carbon stocks)	Pinus tabulaeformis	ECM	19.92	0.6	20.78	1.64	4	4
1271	Fan et al, 2007	nitrogen deposition	SOCS (soil organic carbon stocks)	Cunninghamia lanceolata	AM	31.0887	0.8333	23.1267	1.6667	3	3
1272	Jiao et al, 2021	nitrogen deposition	SOCS (soil organic carbon stocks)	Cunninghamia lanceolata	AM	10.24	1.34	10.29	1.68	3	3
1273	Feng et al, 2019	nitrogen deposition	SOCS (soil organic carbon stocks)	Acacia auriculiformis	AM	35.5462	1.12743	37.0588	1.69114	5	5
1274	Zhou et al, 2017	nitrogen deposition	SOCS (soil organic carbon stocks)	Castanopsis carlesii	ECM	13.6	1.1	14.8	1.7	4	4
1275	Fan et al, 2019	nitrogen deposition	SOCS (soil organic carbon stocks)	Castanopsis kawakamii	AM	13.56	1.1	14.78	1.74	4	4
1276	Fan et al, 2019	nitrogen deposition	SOCS (soil organic carbon stocks)	Castanopsis kawakamii	AM	36.61	7.47	33.32	1.74	4	4
1277	Rodriguez et al, 2014	nitrogen deposition	SOCS (soil organic carbon stocks)	Tsuga canadensis	ECM	4.17	1.76363	3.61	1.78813	6	6
1278	Zhang et al, 2017	nitrogen deposition	SOCS (soil organic carbon stocks)	Cunninghamia lanceolata	AM	23.2	2	21.2	1.8	3	3
1279	LiB et al, 2019	nitrogen deposition	SOCS (soil organic carbon stocks)	Larix gmelinii	ECM	51.2887	1.4433	53.0928	1.8041	3	3
1280	LiB et al, 2019	nitrogen deposition	SOCS (soil organic carbon stocks)	Quercus mongolica	ECM	77.268	2.165	85.567	1.8041	3	3
1281	LiB et al, 2019	nitrogen deposition	SOCS (soil organic carbon stocks)	Larix gmelinii	ECM	77.268	2.165	76.9072	1.8041	3	3
1282	ParkB et al, 2018	nitrogen deposition	SOCS (soil organic carbon stocks)	Pinus koraiensis	ECM	16.4634	3.0488	34.7561	1.8293	3	3
1283	ParkB et al, 2018	nitrogen deposition	SOCS (soil organic carbon stocks)	Quercus acutissima	ECM	17.6829	1.8293	15.2439	1.8293	3	3
1284	Fan et al, 2007	nitrogen deposition	SOCS (soil organic carbon stocks)	Cunninghamia lanceolata	AM	31.0887	0.8333	29.8232	1.875	3	3
1285	Fan et al, 2007	nitrogen deposition	SOCS (soil organic carbon stocks)	Cunninghamia lanceolata	AM	32.9668	0.2083	29.1718	1.875	3	3
1286	Fan et al, 2007	nitrogen deposition	SOCS (soil organic carbon stocks)	Cunninghamia lanceolata	AM	49.4285	0.625	42.94	1.875	3	3
1287	Huang et al, 2016	nitrogen deposition	SOCS (soil organic carbon stocks)	Ormosia pinnata	AM	41.65	1.63	42.15	1.94	6	6
1288	Huang et al, 2016	nitrogen deposition	SOCS (soil organic carbon stocks)	Acacia mangium	AM	45.13	2.23	47.38	1.94	6	6
1289	Zhang et al, 2014	nitrogen deposition	SOCS (soil organic carbon stocks)	Eucalyptus urophylla	ECM	20.9	3	28.9	2	3	3
1290	Zhang et al, 2014	nitrogen deposition	SOCS (soil organic carbon stocks)	Acacia auriculiformis	AM	23.2	2	21.5	2	3	3
1291	Zhang et al, 2017	nitrogen deposition	SOCS (soil organic carbon stocks)	Cunninghamia lanceolata	AM	40.7	3	38	2	3	3
1292	Huang et al, 2016	nitrogen deposition	SOCS (soil organic carbon stocks)	Ormosia pinnata	AM	41.48	4.68	42.37	2.03	6	6
1293	LiB et al, 2019	nitrogen deposition	SOCS (soil organic carbon stocks)	Larix gmelinii	ECM	77.268	2.165	84.8454	2.1649	3	3
1294	Huang et al, 2016	nitrogen deposition	SOCS (soil organic carbon stocks)	Schima superba	AM	35.42	4.18	39.06	2.17	6	6
1295	Jing et al, 2021	nitrogen deposition	SOCS (soil organic carbon stocks)	Pinus tabulaeformis	ECM	20.643	5.548	22.553	2.178	4	4
1296	Dong et al, 2018	nitrogen deposition	SOCS (soil organic carbon stocks)	Cunninghamia lanceolata	AM	19	0.623538	18.5	2.21703	3	3
1297	Cao et al, 2020	nitrogen deposition	SOCS (soil organic carbon stocks)	Cunninghamia lanceolata	AM	39.8	1.78	37.9	2.26	5	5
1298	Fan et al, 2007	nitrogen deposition	SOCS (soil organic carbon stocks)	Cunninghamia lanceolata	AM	49.4285	0.625	39.5916	2.2916	3	3
1299	Li et al, 2020	nitrogen deposition	SOCS (soil organic carbon stocks)	Torreya grandis	AM	26.7	7.27461	28	2.33827	3	3
1300	Li et al, 2020	nitrogen deposition	SOCS (soil organic carbon stocks)	Larix principis-rupprechtii	ECM	27.26	2.7	26.65	2.39	3	3
1301	Zhu et al, 2016	nitrogen deposition	SOCS (soil organic carbon stocks)	Acacia auriculiformis	AM	23.8	2.94449	22.6	2.42487	3	3
1302	ParkB et al, 2018	nitrogen deposition	SOCS (soil organic carbon stocks)	Pinus koraiensis	ECM	12.8049	1.8292	17.0732	2.439	3	3
1303	ParkB et al, 2018	nitrogen deposition	SOCS (soil organic carbon stocks)	Pinus koraiensis	ECM	18.2927	1.8293	20.7317	2.439	3	3
1304	Huang et al, 2016	nitrogen deposition	SOCS (soil organic carbon stocks)	Acacia mangium	AM	41.65	1.63	44.61	2.44	6	6
1305	Ma et al, 2018	nitrogen deposition	SOCS (soil organic carbon stocks)	Larix principis-rupprechtii	ECM	36.1792	5.17034	38.2012	2.58509	3	3
1306	Fan et al, 2019	nitrogen deposition	SOCS (soil organic carbon stocks)	Castanopsis kawakamii	AM	13.56	1.1	15.44	2.59	4	4
1307	Zhou et al, 2017	nitrogen deposition	SOCS (soil organic carbon stocks)	Castanopsis carlesii	ECM	13.6	1.1	15.4	2.6	4	4
1308	Jing et al, 2021	nitrogen deposition	SOCS (soil organic carbon stocks)	Pinus tabulaeformis	ECM	20.643	5.548	21.168	2.624	4	4
1309	Huang et al, 2016	nitrogen deposition	SOCS (soil organic carbon stocks)	Pinus massoniana	ECM	22.32	4.15	21.99	2.68	6	6
1310	Dong et al, 2015	nitrogen deposition	SOCS (soil organic carbon stocks)	Cunninghamia lanceolata	AM	21.6	1.67705	25.8	2.68328	5	5
1311	Zhu et al, 2019	nitrogen deposition	SOCS (soil organic carbon stocks)	Populus deltoides	ECM	37.194	3.7612	51.8209	2.7164	5	5
1312	Zhu et al, 2016	nitrogen deposition	SOCS (soil organic carbon stocks)	Eucalyptus urophylla	ECM	18.5	0.69282	19.6	2.77128	3	3
1313	Zhang et al, 2012	nitrogen deposition	SOCS (soil organic carbon stocks)	Acacia auriculiformis	AM	22.1	3.98372	19	2.77128	3	3
1314	Huang et al, 2016	nitrogen deposition	SOCS (soil organic carbon stocks)	Ormosia pinnata	AM	41.48	4.68	39.6	2.81	6	6
1315	Lv et al, 2020	nitrogen deposition	SOCS (soil organic carbon stocks)	Pinus koraiensis	ECM	28.4024	1.8935	31.2426	2.8402	5	5
1316	Rodriguez et al, 2014	nitrogen deposition	SOCS (soil organic carbon stocks)	Acer saccharum	AM	3.33	0.783837	4.6	2.8904	6	6
1317	Fan et al, 2007	nitrogen deposition	SOCS (soil organic carbon stocks)	Cunninghamia lanceolata	AM	49.4285	0.625	47.9551	2.9167	3	3
1318	Huang et al, 2016	nitrogen deposition	SOCS (soil organic carbon stocks)	Acacia mangium	AM	31.82	0.19	31.52	2.94	6	6
1319	Cao et al, 2020	nitrogen deposition	SOCS (soil organic carbon stocks)	Cunninghamia lanceolata	AM	39.8	1.78	42.8	2.95	5	5
1320	Zhang et al, 2014	nitrogen deposition	SOCS (soil organic carbon stocks)	Eucalyptus urophylla	ECM	20.9	3	25.8	3	3	3
1321	Zhang et al, 2014	nitrogen deposition	SOCS (soil organic carbon stocks)	Acacia auriculiformis	AM	40.7	3	32.7	3	3	3
1322	ParkB et al, 2018	nitrogen deposition	SOCS (soil organic carbon stocks)	Quercus acutissima	ECM	32.9268	4.2683	31.0976	3.0487	3	3
1323	ParkB et al, 2018	nitrogen deposition	SOCS (soil organic carbon stocks)	Quercus acutissima	ECM	27.439	3.0488	28.0488	3.0488	3	3
1324	ParkB et al, 2018	nitrogen deposition	SOCS (soil organic carbon stocks)	Quercus acutissima	ECM	51.2195	1.8293	62.1951	3.0488	3	3
1325	Zhu et al, 2016	nitrogen deposition	SOCS (soil organic carbon stocks)	Eucalyptus urophylla	ECM	18.5	0.69282	21.7	3.11769	3	3
1326	Zhu et al, 2019	nitrogen deposition	SOCS (soil organic carbon stocks)	Populus deltoides	ECM	37.194	3.7612	57.8806	3.1343	5	5
1327	Cui et al, 2021	nitrogen deposition	SOCS (soil organic carbon stocks)	Pinus taiwanensis	ECM	55.73	2.68	47.02	3.16	4	4
1328	Li et al, 2020	nitrogen deposition	SOCS (soil organic carbon stocks)	Larix principis-rupprechtii	ECM	20.28	2.15	18.74	3.18	3	3
1329	Huang et al, 2016	nitrogen deposition	SOCS (soil organic carbon stocks)	Pinus massoniana	ECM	22.32	4.15	28.91	3.28	6	6
1330	Guo et al, 2013	nitrogen deposition	SOCS (soil organic carbon stocks)	Piuns tabulaeformis	ECM	22.9	1.14039	25.8	3.28702	5	5
1331	Li et al, 2020	nitrogen deposition	SOCS (soil organic carbon stocks)	Larix principis-rupprechtii	ECM	17.61	1.98	15.69	3.29	3	3
1332	Rappe et al, 2013	nitrogen deposition	SOCS (soil organic carbon stocks)	Picea abies	ECM	22.6	2.7	49.2	3.3	3	3
1333	Guo et al, 2013	nitrogen deposition	SOCS (soil organic carbon stocks)	Piuns tabulaeformis	ECM	22.9	5.73	33.04	3.37	3	3
1334	Rodriguez et al, 2014	nitrogen deposition	SOCS (soil organic carbon stocks)	Betula alleghaniensis	ECM	3.2	0.881816	3.4	3.3803	6	6
1335	Rodriguez et al, 2014	nitrogen deposition	SOCS (soil organic carbon stocks)	Betula alleghaniensis	ECM	38.8	6.36867	44	3.42929	6	6
1336	Li et al, 2020	nitrogen deposition	SOCS (soil organic carbon stocks)	Larix principis-rupprechtii	ECM	27.26	2.7	24.19	3.46	3	3
1337	Zhang et al, 2012	nitrogen deposition	SOCS (soil organic carbon stocks)	Eucalyptus citriodora	ECM	15.5	1.55885	15.6	3.63731	3	3
1338	Dong et al, 2015	nitrogen deposition	SOCS (soil organic carbon stocks)	Cunninghamia lanceolata	AM	22.9	5.73	13.35	3.75	3	3
1339	Cui et al, 2021	nitrogen deposition	SOCS (soil organic carbon stocks)	Pinus taiwanensis	ECM	26.25	2.96	30.98	3.77	4	4
1340	Cui et al, 2021	nitrogen deposition	SOCS (soil organic carbon stocks)	Pinus taiwanensis	ECM	26.25	2.96	27.27	3.92	4	4
1341	Zhu et al, 2019	nitrogen deposition	SOCS (soil organic carbon stocks)	Populus deltoides	ECM	37.194	3.7612	36.5672	3.9701	5	5
1342	Zhang et al, 2014	nitrogen deposition	SOCS (soil organic carbon stocks)	Ginkgo biloba	AM	15.7	1.351	13.76	4.27817	3	3
1343	Rappe et al, 2013	nitrogen deposition	SOCS (soil organic carbon stocks)	Picea abies	ECM	19.4	3.3	48.7	4.4	3	3
1344	Cui et al, 2021	nitrogen deposition	SOCS (soil organic carbon stocks)	Pinus taiwanensis	ECM	55.73	2.68	55.99	4.41	4	4
1345	He et al, 2021	nitrogen deposition	SOCS (soil organic carbon stocks)	Pinus koraiensis	ECM	15.6	2.64	14.51	4.58	3	3
1346	He et al, 2021	nitrogen deposition	SOCS (soil organic carbon stocks)	Pinus koraiensis	ECM	15.6	2.64	19.84	4.61	3	3
1347	Zhao et al, 2018	nitrogen deposition	SOCS (soil organic carbon stocks)	Pinus tabulaeformis	ECM	34.85	9.99393	28.45	4.62458	3	3
1348	Lv et al, 2020	nitrogen deposition	SOCS (soil organic carbon stocks)	Pinus koraiensis	ECM	48.7574	2.8402	60.1183	4.7338	5	5
1349	Huang et al, 2016	nitrogen deposition	SOCS (soil organic carbon stocks)	Acacia mangium	AM	31.82	0.19	29.74	4.94	6	6
1350	Lv et al, 2020	nitrogen deposition	SOCS (soil organic carbon stocks)	Pinus koraiensis	ECM	48.7574	2.8402	56.8047	5.2071	5	5
1351	Dong et al, 2015	nitrogen deposition	SOCS (soil organic carbon stocks)	Cunninghamia lanceolata	AM	22.9	5.73	10.38	5.24	3	3
1352	He et al, 2021	nitrogen deposition	SOCS (soil organic carbon stocks)	Pinus koraiensis	ECM	15.6	2.64	13.79	5.29	3	3
1353	Jing et al, 2021	nitrogen deposition	SOCS (soil organic carbon stocks)	Pinus tabulaeformis	ECM	20.643	5.548	15.57	5.456	4	4
1354	WangB et al, 2016	nitrogen deposition	SOCS (soil organic carbon stocks)	Pinus tabulaeformis	ECM	45.3	5.9	46	5.7	4	4
1355	WangB et al, 2016	nitrogen deposition	SOCS (soil organic carbon stocks)	Pinus tabulaeformis	ECM	45.3	5.9	44.1	5.8	4	4
1356	Guo et al, 2013	nitrogen deposition	SOCS (soil organic carbon stocks)	Piuns tabulaeformis	ECM	45.3	5.94	42.14	5.83	3	3
1357	Li et al, 2020	nitrogen deposition	SOCS (soil organic carbon stocks)	Torreya grandis	AM	26.7	7.27461	29.77	5.85433	3	3
1358	Rodriguez et al, 2014	nitrogen deposition	SOCS (soil organic carbon stocks)	Fagus grandifolia	ECM	36.5	10.0429	42.8	5.87878	6	6
1359	WangB et al, 2016	nitrogen deposition	SOCS (soil organic carbon stocks)	Pinus tabulaeformis	ECM	45.3	5.9	44	6.1	4	4
1360	Huang et al, 2016	nitrogen deposition	SOCS (soil organic carbon stocks)	Schima superba	AM	46.09	7.94	47.85	6.13	6	6
1361	Zhao et al, 2018	nitrogen deposition	SOCS (soil organic carbon stocks)	Pinus tabulaeformis	ECM	34.85	9.99393	26.51	6.14878	3	3
1362	Dorr et al, 2010	nitrogen deposition	SOCS (soil organic carbon stocks)	Picea abies	ECM	45.5	8.27345	39.7	6.26099	5	5
1363	Rodriguez et al, 2014	nitrogen deposition	SOCS (soil organic carbon stocks)	Tsuga canadensis	ECM	34.4	11.0227	36.1	6.61362	6	6
1364	Yan et al, 2019	nitrogen deposition	SOCS (soil organic carbon stocks)	Tilia amurensis	ECM	68.26	7.49978	70.9	7.20533	3	3
1365	Huang et al, 2016	nitrogen deposition	SOCS (soil organic carbon stocks)	Ormosia pinnata	AM	45.13	2.23	45.04	7.21	6	6
1366	Lv et al, 2020	nitrogen deposition	SOCS (soil organic carbon stocks)	Pinus koraiensis	ECM	28.4024	1.8935	38.8166	7.5739	5	5
1367	Zhao et al, 2018	nitrogen deposition	SOCS (soil organic carbon stocks)	Pinus tabulaeformis	ECM	34.85	9.99393	25.17	7.65566	3	3
1368	Ma et al, 2018	nitrogen deposition	SOCS (soil organic carbon stocks)	Larix principis-rupprechtii	ECM	36.1792	5.17034	46.1773	7.75543	3	3
1369	Lei et al, 2018	nitrogen deposition	SOCS (soil organic carbon stocks)	Cunninghamia lanceolata	AM	37.92	11.56	28.57	7.9	4	4
1370	Zhou et al, 2017	nitrogen deposition	SOCS (soil organic carbon stocks)	Castanopsis carlesii	ECM	36.6	7.5	33.3	8	4	4
1371	Lv et al, 2020	nitrogen deposition	SOCS (soil organic carbon stocks)	Pinus koraiensis	ECM	28.4024	1.8935	42.1302	8.0473	5	5
1372	Rodriguez et al, 2014	nitrogen deposition	SOCS (soil organic carbon stocks)	Quercus rubra	ECM	28.8	4.40908	33.4	8.08332	6	6
1373	Ma et al, 2018	nitrogen deposition	SOCS (soil organic carbon stocks)	Larix principis-rupprechtii	ECM	36.1792	5.17034	37.1902	8.61713	3	3
1374	Rappe et al, 2013	nitrogen deposition	SOCS (soil organic carbon stocks)	Picea abies	ECM	19.4	3.3	42.6	8.9	3	3
1375	Lei et al, 2018	nitrogen deposition	SOCS (soil organic carbon stocks)	Cunninghamia lanceolata	AM	41.16	7.1	30.74	9.54	4	4
1376	Rodriguez et al, 2014	nitrogen deposition	SOCS (soil organic carbon stocks)	Acer saccharum	AM	26.7	8.81816	31.1	9.55301	6	6
1377	Hu et al, 2010	nitrogen deposition	SOCS (soil organic carbon stocks)	Larix gmelinii	ECM	51.93	4.71118	46.71	9.61288	3	3
1378	Guo et al, 2013	nitrogen deposition	SOCS (soil organic carbon stocks)	Piuns tabulaeformis	ECM	45.3	5.94	36.08	9.7	3	3
1379	Guo et al, 2013	nitrogen deposition	SOCS (soil organic carbon stocks)	Piuns tabulaeformis	ECM	45.3	5.94	61.02	10.09	3	3
1380	Rappe et al, 2013	nitrogen deposition	SOCS (soil organic carbon stocks)	Picea abies	ECM	22.6	2.7	49.4	10.2	3	3
1381	Liu et al, 2014	nitrogen deposition	SOCS (soil organic carbon stocks)	Pinus koraiensis	ECM	74	15.4153	48	10.9119	3	3
1382	Ma et al, 2018	nitrogen deposition	SOCS (soil organic carbon stocks)	Larix principis-rupprechtii	ECM	51.3351	6.03204	65.7789	12.0641	3	3
1383	Yan et al, 2019	nitrogen deposition	SOCS (soil organic carbon stocks)	Fraxinus mandshurica	AM	74.21	9.82073	77.53	12.4188	3	3
1384	Yan et al, 2019	nitrogen deposition	SOCS (soil organic carbon stocks)	Pinus koraiensis	ECM	70.23	12.4015	69.52	12.4361	3	3
1385	Zhou et al, 2017	nitrogen deposition	SOCS (soil organic carbon stocks)	Castanopsis carlesii	ECM	36.6	7.5	39.2	13	4	4
1386	Fan et al, 2019	nitrogen deposition	SOCS (soil organic carbon stocks)	Castanopsis kawakamii	AM	36.61	7.47	39.18	13.03	4	4
1387	Yang et al, 2018	nitrogen deposition	SOCS (soil organic carbon stocks)	Larix gmelinii	ECM	80.597	9.69429	85.0746	13.572	3	3
1388	Ma et al, 2018	nitrogen deposition	SOCS (soil organic carbon stocks)	Larix principis-rupprechtii	ECM	51.3351	6.03204	41.431	13.7875	3	3
1389	Lv et al, 2020	nitrogen deposition	SOCS (soil organic carbon stocks)	Pinus koraiensis	ECM	48.7574	2.8402	62.9586	14.2012	5	5
1390	Liu et al, 2014	nitrogen deposition	SOCS (soil organic carbon stocks)	Pinus koraiensis	ECM	178	32.3894	217	14.376	3	3
1391	Song et al, 2017	nitrogen deposition	SOCS (soil organic carbon stocks)	Pinus koraiensis	ECM	96.6	17.4413	87.9	14.5344	5	5
1392	Hu et al, 2010	nitrogen deposition	SOCS (soil organic carbon stocks)	Larix gmelinii	ECM	98.17	7.4305	100.45	15.9695	3	3
1393	Ma et al, 2018	nitrogen deposition	SOCS (soil organic carbon stocks)	Larix principis-rupprechtii	ECM	51.3351	6.03204	73.2567	16.3726	3	3
1394	Liu et al, 2014	nitrogen deposition	SOCS (soil organic carbon stocks)	Pinus koraiensis	ECM	74	15.4153	150	17.3205	3	3
1395	Yang et al, 2018	nitrogen deposition	SOCS (soil organic carbon stocks)	Larix gmelinii	ECM	48.1343	13.572	45.8955	17.4497	3	3
1396	Liu et al, 2014	nitrogen deposition	SOCS (soil organic carbon stocks)	Pinus koraiensis	ECM	74	15.4153	106	17.4937	3	3
1397	Song et al, 2017	nitrogen deposition	SOCS (soil organic carbon stocks)	Pinus koraiensis	ECM	96.6	17.4413	98.5	18.1122	5	5
1398	Liu et al, 2014	nitrogen deposition	SOCS (soil organic carbon stocks)	Pinus koraiensis	ECM	178	32.3894	233	19.5722	3	3
1399	Liu et al, 2014	nitrogen deposition	SOCS (soil organic carbon stocks)	Pinus koraiensis	ECM	324	36.5463	304	19.5722	3	3
1400	Song et al, 2017	nitrogen deposition	SOCS (soil organic carbon stocks)	Pinus koraiensis	ECM	96.6	17.4413	82.5	22.8079	5	5
1401	Liu et al, 2014	nitrogen deposition	SOCS (soil organic carbon stocks)	Pinus koraiensis	ECM	324	36.5463	344	22.8631	3	3
1402	Liu et al, 2014	nitrogen deposition	SOCS (soil organic carbon stocks)	Pinus koraiensis	ECM	192	34.2946	237	25.1147	3	3
1403	Dorr et al, 2010	nitrogen deposition	SOCS (soil organic carbon stocks)	Picea abies	ECM	434.8	25.4912	436	25.9384	5	5
1404	Dorr et al, 2010	nitrogen deposition	SOCS (soil organic carbon stocks)	Picea abies	ECM	350.1	71.3306	327.2	26.6092	5	5
1405	Liu et al, 2014	nitrogen deposition	SOCS (soil organic carbon stocks)	Pinus koraiensis	ECM	192	34.2946	228	30.6573	3	3
1406	Liu et al, 2014	nitrogen deposition	SOCS (soil organic carbon stocks)	Pinus koraiensis	ECM	178	32.3894	249	31.3501	3	3
1407	Liu et al, 2014	nitrogen deposition	SOCS (soil organic carbon stocks)	Pinus koraiensis	ECM	192	34.2946	190	32.2161	3	3
1408	Liu et al, 2014	nitrogen deposition	SOCS (soil organic carbon stocks)	Pinus koraiensis	ECM	324	36.5463	312	32.909	3	3
1409	Frey et al, 2004	nitrogen deposition	SOCS (soil organic carbon stocks)	Pinus resinosa	ECM	6283	706.677	8088	585.433	3	3
1410	Frey et al, 2004	nitrogen deposition	SOCS (soil organic carbon stocks)	Pinus resinosa	ECM	6283	706.677	7861	767.299	3	3
1411	Xiang et al, 2014	nitrogen deposition	MBC (microbial biomass carbon)	Eucalyptus grandis	ECM	0.216043	0.02139	0.263102	0.02139	3	3
1412	Xiang et al, 2014	nitrogen deposition	MBC (microbial biomass carbon)	Eucalyptus grandis	ECM	0.216043	0.02139	0.322995	0.023529	3	3
1413	Xiang et al, 2014	nitrogen deposition	MBC (microbial biomass carbon)	Eucalyptus grandis	ECM	0.216043	0.02139	0.254545	0.02353	3	3
1414	Zhu et al, 2019	nitrogen deposition	MBC (microbial biomass carbon)	Populus deltoides	ECM	2.15596	0.04587	2.46789	0.0367	5	5
1415	Lin et al, 2016	nitrogen deposition	MBC (microbial biomass carbon)	Castanopsis fabri	ECM	0.417647	0.141177	0.541176	0.058824	3	3
1416	Lin et al, 2016	nitrogen deposition	MBC (microbial biomass carbon)	Cinnamomum chekiangense	AM	0.447059	0.252941	0.6	0.058824	3	3
1417	Zhu et al, 2019	nitrogen deposition	MBC (microbial biomass carbon)	Populus deltoides	ECM	2.15596	0.04587	2.42202	0.06422	5	5
1418	Lin et al, 2016	nitrogen deposition	MBC (microbial biomass carbon)	Cinnamomum chekiangense	AM	0.447059	0.252941	0.541176	0.076471	3	3
1419	Zhu et al, 2019	nitrogen deposition	MBC (microbial biomass carbon)	Populus deltoides	ECM	2.15596	0.04587	2.76147	0.08257	5	5
1420	Zhu et al, 2019	nitrogen deposition	MBC (microbial biomass carbon)	Populus deltoides	ECM	2.15596	0.04587	2.43119	0.10092	5	5
1421	Lin et al, 2016	nitrogen deposition	MBC (microbial biomass carbon)	Cunninghamia lanceolata	AM	0.217647	0.047059	0.517647	0.111765	3	3
1422	Ma et al, 2018	nitrogen deposition	MBC (microbial biomass carbon)	Larix principis-rupprechtii	ECM	1.73753	0.364216	1.90144	0.182108	3	3
1423	Lin et al, 2016	nitrogen deposition	MBC (microbial biomass carbon)	Castanopsis fabri	ECM	0.417647	0.141177	0.988235	0.241175	3	3
1424	Lin et al, 2016	nitrogen deposition	MBC (microbial biomass carbon)	Cunninghamia lanceolata	AM	0.217647	0.047059	0.676471	0.247058	3	3
1425	Yan et al, 2020	nitrogen deposition	MBC (microbial biomass carbon)	Pinus elliottii	ECM	1.67	0.538888	1.17	0.269444	6	6
1426	Yan et al, 2020	nitrogen deposition	MBC (microbial biomass carbon)	Pinus elliottii	ECM	1.67	0.538888	1.29	0.342929	6	6
1427	Ma et al, 2018	nitrogen deposition	MBC (microbial biomass carbon)	Larix principis-rupprechtii	ECM	1.73753	0.364216	1.42288	0.343968	3	3
1428	Ma et al, 2018	nitrogen deposition	MBC (microbial biomass carbon)	Larix principis-rupprechtii	ECM	2.02322	0.0404607	1.39278	0.343985	3	3
1429	Ma et al, 2018	nitrogen deposition	MBC (microbial biomass carbon)	Larix principis-rupprechtii	ECM	2.02322	0.0404607	1.56873	0.364216	3	3
1430	Yan et al, 2020	nitrogen deposition	MBC (microbial biomass carbon)	Pinus elliottii	ECM	1.67	0.538888	1.21	0.391918	6	6
1431	Yan et al, 2020	nitrogen deposition	MBC (microbial biomass carbon)	Cinnamomum camphora	AM	3.05	0.881816	1.92	0.465403	6	6
1432	Song et al, 2017	nitrogen deposition	MBC (microbial biomass carbon)	Pinus koraiensis	ECM	1.54	0.268328	1.45	0.514296	5	5
1433	Yan et al, 2020	nitrogen deposition	MBC (microbial biomass carbon)	Cinnamomum camphora	AM	3.05	0.881816	2	0.538888	6	6
1434	Song et al, 2017	nitrogen deposition	MBC (microbial biomass carbon)	Pinus koraiensis	ECM	1.54	0.268328	1.77	0.559017	5	5
1435	Song et al, 2017	nitrogen deposition	MBC (microbial biomass carbon)	Pinus koraiensis	ECM	1.54	0.268328	1.47	0.603738	5	5
1436	Ma et al, 2018	nitrogen deposition	MBC (microbial biomass carbon)	Larix principis-rupprechtii	ECM	1.73753	0.364216	1.4466	0.607032	3	3
1437	Yan et al, 2020	nitrogen deposition	MBC (microbial biomass carbon)	Cinnamomum camphora	AM	3.05	0.881816	1.99	0.612372	6	6
1438	Ma et al, 2018	nitrogen deposition	MBC (microbial biomass carbon)	Larix principis-rupprechtii	ECM	2.02322	0.0404607	1.03099	0.991478	3	3
1439	Chai et al, 2019	nitrogen deposition	MBC (microbial biomass carbon)	Torreya grandis	AM	591.973	3.345	775.92	3.344	3	3
1440	Yang et al, 2020	nitrogen deposition	MBC (microbial biomass carbon)	Pinus tabulaeformis	ECM	643.87	15.7443	322.08	3.41214	3	3
1441	Yang et al, 2020	nitrogen deposition	MBC (microbial biomass carbon)	Pinus tabulaeformis	ECM	643.87	15.7443	577.13	3.84515	3	3
1442	Zhu et al, 2017	nitrogen deposition	MBC (microbial biomass carbon)	Larix principis-rupprechtii	ECM	251.095	15.171	397.08	5.05759	3	3
1443	Xu et al, 2014	nitrogen deposition	MBC (microbial biomass carbon)	Populus deltoides	ECM	183.051	10.169	203.39	5.085	4	4
1444	Xu et al, 2014	nitrogen deposition	MBC (microbial biomass carbon)	Populus deltoides	ECM	320.339	10.169	320.339	5.085	4	4
1445	Yu et al, 2021	nitrogen deposition	MBC (microbial biomass carbon)	Populus deltoides	ECM	149.82	35.0567	126.58	5.85433	3	3
1446	Liu et al, 2018	nitrogen deposition	MBC (microbial biomass carbon)	Pinus tabuliformis	ECM	87.7551	8.1633	107.143	6.122	6	6
1447	Liu et al, 2018	nitrogen deposition	MBC (microbial biomass carbon)	Pinus tabuliformis	ECM	87.7551	8.1633	74.4898	6.1224	6	6
1448	Chai et al, 2019	nitrogen deposition	MBC (microbial biomass carbon)	Torreya grandis	AM	591.973	3.345	391.304	6.689	3	3
1449	Liu et al, 2018	nitrogen deposition	MBC (microbial biomass carbon)	Pinus tabuliformis	ECM	87.7551	8.1633	102.041	8.163	6	6
1450	Liu et al, 2018	nitrogen deposition	MBC (microbial biomass carbon)	Pinus tabuliformis	ECM	87.7551	8.1633	87.7551	9.1837	6	6
1451	Xu et al, 2014	nitrogen deposition	MBC (microbial biomass carbon)	Populus deltoides	ECM	183.051	10.169	167.797	10.169	4	4
1452	Xu et al, 2014	nitrogen deposition	MBC (microbial biomass carbon)	Populus deltoides	ECM	376.271	10.17	401.695	10.169	4	4
1453	Xu et al, 2014	nitrogen deposition	MBC (microbial biomass carbon)	Populus deltoides	ECM	376.271	10.17	391.525	10.17	4	4
1454	Liu et al, 2018	nitrogen deposition	MBC (microbial biomass carbon)	Pinus tabuliformis	ECM	87.7551	8.1633	212.245	11.224	6	6
1455	Yang et al, 2020	nitrogen deposition	MBC (microbial biomass carbon)	Pinus tabulaeformis	ECM	643.87	15.7443	372.86	11.3623	3	3
1456	Hao et al, 2020	nitrogen deposition	MBC (microbial biomass carbon)	Larix olgensis	ECM	612.91	90.1	741.88	11.78	4	4
1457	Lee et al, 2003	nitrogen deposition	MBC (microbial biomass carbon)	Populus deltoides	ECM	188.136	8.474	136.441	11.864	4	4
1458	Zhou et al, 2017	nitrogen deposition	MBC (microbial biomass carbon)	Castanopsis carlesii	ECM	538	37.9	560.5	12	4	4
1459	Zhou et al, 2018	nitrogen deposition	MBC (microbial biomass carbon)	Alnus cremastogyne	ECM	347.418	16.264	225.352	13.0112	3	3
1460	Yuan et al, 2012	nitrogen deposition	MBC (microbial biomass carbon)	Cunninghamia lanceolata	AM	707.78	43.05	721.01	13.06	3	3
1461	Yuan et al, 2012	nitrogen deposition	MBC (microbial biomass carbon)	Cunninghamia lanceolata	AM	421.13	27.02	465.95	13.34	4	4
1462	Hao et al, 2020	nitrogen deposition	MBC (microbial biomass carbon)	Fraxinus mandschurica	AM	370.55	45.37	338.58	13.51	3	3
1463	Lagomarsino et al, 2006	nitrogen deposition	MBC (microbial biomass carbon)	Populus alba	ECM	183.051	10.169	198.305	15.254	4	4
1464	Xu et al, 2014	nitrogen deposition	MBC (microbial biomass carbon)	Populus deltoides	ECM	259.322	15.254	305.085	15.254	4	4
1465	Xu et al, 2014	nitrogen deposition	MBC (microbial biomass carbon)	Populus deltoides	ECM	320.339	10.169	361.017	15.254	4	4
1466	Xu et al, 2014	nitrogen deposition	MBC (microbial biomass carbon)	Populus deltoides	ECM	376.271	10.17	381.356	15.254	4	4
1467	Xu et al, 2014	nitrogen deposition	MBC (microbial biomass carbon)	Populus deltoides	ECM	493.22	15.255	706.78	15.254	4	4
1468	Xu et al, 2014	nitrogen deposition	MBC (microbial biomass carbon)	Populus deltoides	ECM	259.322	15.254	274.576	15.255	4	4
1469	Xu et al, 2014	nitrogen deposition	MBC (microbial biomass carbon)	Populus deltoides	ECM	189.873	20.8861	262.025	16.1392	3	3
1470	Zhang et al, 2012	nitrogen deposition	MBC (microbial biomass carbon)	Acacia auriculiformis	AM	254	23.7291	215	16.8009	3	3
1471	Zhang et al, 2019	nitrogen deposition	MBC (microbial biomass carbon)	Torreya grandis	AM	539.8	32.5	488.3	18	3	3
1472	Zhao et al, 2018	nitrogen deposition	MBC (microbial biomass carbon)	Pinus tabulaeformis	ECM	397.152	27.6383	308.073	18.4256	3	3
1473	Zhou et al, 2018	nitrogen deposition	MBC (microbial biomass carbon)	Liquidambar formosana	AM	381.221	19.515	364.319	19.5167	3	3
1474	Zhao et al, 2019	nitrogen deposition	MBC (microbial biomass carbon)	Populus simonii	AM	259.716	26.2683	197.156	19.7021	3	3
1475	Xu et al, 2014	nitrogen deposition	MBC (microbial biomass carbon)	Populus deltoides	ECM	183.051	10.169	193.22	20.339	4	4
1476	Xu et al, 2014	nitrogen deposition	MBC (microbial biomass carbon)	Populus deltoides	ECM	259.322	15.254	264.407	20.339	4	4
1477	Xu et al, 2014	nitrogen deposition	MBC (microbial biomass carbon)	Populus deltoides	ECM	320.339	10.169	355.932	20.339	4	4
1478	Xu et al, 2014	nitrogen deposition	MBC (microbial biomass carbon)	Populus deltoides	ECM	320.339	10.169	300	20.339	4	4
1479	Xu et al, 2014	nitrogen deposition	MBC (microbial biomass carbon)	Populus deltoides	ECM	376.271	10.17	600	20.339	4	4
1480	Xu et al, 2014	nitrogen deposition	MBC (microbial biomass carbon)	Populus deltoides	ECM	493.22	15.255	559.322	20.339	4	4
1481	Xu et al, 2014	nitrogen deposition	MBC (microbial biomass carbon)	Populus deltoides	ECM	493.22	15.255	594.915	20.339	4	4
1482	Zhu et al, 2016	nitrogen deposition	MBC (microbial biomass carbon)	Acacia auriculiformis	AM	333.333	25.1026	251.208	20.918	3	3
1483	Guo et al, 2013	nitrogen deposition	MBC (microbial biomass carbon)	Piuns tabulaeformis	ECM	245.763	67.7966	118.644	21.1864	3	3
1484	Guo et al, 2013	nitrogen deposition	MBC (microbial biomass carbon)	Piuns tabulaeformis	ECM	313.559	59.322	334.746	21.1864	3	3
1485	Yu et al, 2021	nitrogen deposition	MBC (microbial biomass carbon)	Populus deltoides	ECM	210.55	34.3812	127.37	22.0144	3	3
1486	Yu et al, 2021	nitrogen deposition	MBC (microbial biomass carbon)	Populus deltoides	ECM	149.82	35.0567	142.02	22.1183	3	3
1487	Zhao et al, 2019	nitrogen deposition	MBC (microbial biomass carbon)	Pinus sylvestris	ECM	136.493	13.1341	121.327	22.9843	3	3
1488	Chen et al, 2020	nitrogen deposition	MBC (microbial biomass carbon)	Pinus massoniana	ECM	394.6	15.7	426.9	23.4	3	3
1489	Lin et al, 2012	nitrogen deposition	MBC (microbial biomass carbon)	Pinus sylvestris	ECM	73.7008	25.5118	98.7402	23.622	4	4
1490	Chen et al, 2020	nitrogen deposition	MBC (microbial biomass carbon)	Pinus massoniana	ECM	394.6	15.7	399.5	24	3	3
1491	Zhang et al, 2019	nitrogen deposition	MBC (microbial biomass carbon)	Torreya grandis	AM	539.8	32.5	527.1	24.8	3	3
1492	Zhang et al, 2012	nitrogen deposition	MBC (microbial biomass carbon)	Acacia auriculiformis	AM	254	23.7291	204	25.2879	3	3
1493	Xu et al, 2014	nitrogen deposition	MBC (microbial biomass carbon)	Populus deltoides	ECM	727.119	20.339	1083.05	25.42	4	4
1494	Lee et al, 2003	nitrogen deposition	MBC (microbial biomass carbon)	Populus deltoides	ECM	188.136	8.474	148.305	25.424	4	4
1495	Xu et al, 2014	nitrogen deposition	MBC (microbial biomass carbon)	Populus deltoides	ECM	259.322	15.254	233.898	25.424	4	4
1496	Zhang et al, 2014	nitrogen deposition	MBC (microbial biomass carbon)	Eucalyptus urophylla	ECM	378	33	326	26	3	3
1497	Zhou et al, 2018	nitrogen deposition	MBC (microbial biomass carbon)	Liquidambar formosana	AM	381.221	19.515	349.296	26.0206	3	3
1498	Chen et al, 2020	nitrogen deposition	MBC (microbial biomass carbon)	Pinus massoniana	ECM	394.6	15.7	456.9	26.4	3	3
1499	Yu et al, 2021	nitrogen deposition	MBC (microbial biomass carbon)	Populus deltoides	ECM	210.55	34.3812	126.4	27.02	3	3
1500	Yuan et al, 2012	nitrogen deposition	MBC (microbial biomass carbon)	Cunninghamia lanceolata	AM	370.55	45.37	388.76	28.69	3	3
1501	Zhu et al, 2016	nitrogen deposition	MBC (microbial biomass carbon)	Acacia auriculiformis	AM	333.333	25.1026	301.932	29.2872	3	3
1502	Yuan et al, 2012	nitrogen deposition	MBC (microbial biomass carbon)	Cunninghamia lanceolata	AM	370.55	45.37	353.53	29.42	3	3
1503	Guo et al, 2013	nitrogen deposition	MBC (microbial biomass carbon)	Piuns tabulaeformis	ECM	151.899	28.481	170.886	29.4304	3	3
1504	Guo et al, 2013	nitrogen deposition	MBC (microbial biomass carbon)	Piuns tabulaeformis	ECM	144.068	55.0847	118.644	29.661	3	3
1505	Guo et al, 2013	nitrogen deposition	MBC (microbial biomass carbon)	Piuns tabulaeformis	ECM	245.763	67.7966	216.102	29.661	3	3
1506	Xu et al, 2014	nitrogen deposition	MBC (microbial biomass carbon)	Populus deltoides	ECM	245.763	67.7966	135.593	29.661	3	3
1507	Xu et al, 2014	nitrogen deposition	MBC (microbial biomass carbon)	Populus deltoides	ECM	727.119	20.339	874.576	30.509	4	4
1508	Hao et al, 2020	nitrogen deposition	MBC (microbial biomass carbon)	Pinus koraiensis	ECM	727.119	20.339	910.169	30.509	4	4
1509	Zhang et al, 2014	nitrogen deposition	MBC (microbial biomass carbon)	Acacia auriculiformis	AM	523.3	35.36	518.85	30.81	3	3
1510	Yuan et al, 2012	nitrogen deposition	MBC (microbial biomass carbon)	Cunninghamia lanceolata	AM	330	31	292	31	3	3
1511	Zhu et al, 2016	nitrogen deposition	MBC (microbial biomass carbon)	Eucalyptus urophylla	ECM	589.71	44.12	642.12	32.42	4	4
1512	Zhang et al, 2014	nitrogen deposition	MBC (microbial biomass carbon)	Acacia auriculiformis	AM	330	31	350	33	3	3
1513	Guo et al, 2013	nitrogen deposition	MBC (microbial biomass carbon)	Piuns tabulaeformis	ECM	374.396	25.1026	321.256	33.4701	3	3
1514	Guo et al, 2013	nitrogen deposition	MBC (microbial biomass carbon)	Piuns tabulaeformis	ECM	144.068	55.0847	177.966	33.8983	3	3
1515	Guo et al, 2013	nitrogen deposition	MBC (microbial biomass carbon)	Piuns tabulaeformis	ECM	250	42.3729	355.932	33.8983	3	3
1516	Zhang et al, 2014	nitrogen deposition	MBC (microbial biomass carbon)	Eucalyptus urophylla	ECM	313.559	59.322	199.153	33.8983	3	3
1517	LiB et al, 2019	nitrogen deposition	MBC (microbial biomass carbon)	Larix gmelinii	ECM	378	33	333	34	3	3
1518	Zhu et al, 2017	nitrogen deposition	MBC (microbial biomass carbon)	Larix principis-rupprechtii	ECM	587.629	51.031	644.33	34.021	3	3
1519	Xu et al, 2014	nitrogen deposition	MBC (microbial biomass carbon)	Populus deltoides	ECM	251.095	15.171	286.131	35.3997	3	3
1520	Lee et al, 2003	nitrogen deposition	MBC (microbial biomass carbon)	Pinus taeda	ECM	493.22	15.255	508.475	35.593	4	4
1521	Zhou et al, 2018	nitrogen deposition	MBC (microbial biomass carbon)	Alnus cremastogyne	ECM	162.712	13.56	121.186	35.594	4	4
1522	Hao et al, 2020	nitrogen deposition	MBC (microbial biomass carbon)	Betula platyphylla	ECM	347.418	16.264	285.446	35.779	3	3
1523	Zhao et al, 2018	nitrogen deposition	MBC (microbial biomass carbon)	Pinus tabulaeformis	ECM	612.91	90.1	771.92	35.84	4	4
1524	Yuan et al, 2012	nitrogen deposition	MBC (microbial biomass carbon)	Cunninghamia lanceolata	AM	523.3	35.36	581.37	35.93	3	3
1525	Lagomarsino et al, 2006	nitrogen deposition	MBC (microbial biomass carbon)	Populus alba	ECM	397.152	27.6383	328.895	36.8528	3	3
1526	Hao et al, 2020	nitrogen deposition	MBC (microbial biomass carbon)	Pinus koraiensis	ECM	421.13	27.02	481.69	38.12	4	4
1527	Guo et al, 2013	nitrogen deposition	MBC (microbial biomass carbon)	Piuns tabulaeformis	ECM	144.068	55.0847	224.576	38.1356	3	3
1528	Lee et al, 2003	nitrogen deposition	MBC (microbial biomass carbon)	Pinus taeda	ECM	162.712	13.56	123.729	38.982	4	4
1529	Zhang et al, 2012	nitrogen deposition	MBC (microbial biomass carbon)	Eucalyptus citriodora	ECM	288	36.8927	206	39.3176	3	3
1530	Zhou et al, 2017	nitrogen deposition	MBC (microbial biomass carbon)	Castanopsis carlesii	ECM	538	37.9	500.5	39.5	4	4
1531	LiB et al, 2019	nitrogen deposition	MBC (microbial biomass carbon)	Quercus mongolica	ECM	417.526	39.69	457.216	39.691	3	3
1532	LiB et al, 2019	nitrogen deposition	MBC (microbial biomass carbon)	Quercus mongolica	ECM	417.526	39.69	485.567	39.691	3	3
1533	Yuan et al, 2012	nitrogen deposition	MBC (microbial biomass carbon)	Cunninghamia lanceolata	AM	707.78	43.05	692.21	39.99	3	3
1534	Yuan et al, 2012	nitrogen deposition	MBC (microbial biomass carbon)	Cunninghamia lanceolata	AM	707.78	43.05	777.42	41.07	3	3
1535	Yuan et al, 2012	nitrogen deposition	MBC (microbial biomass carbon)	Cunninghamia lanceolata	AM	523.3	35.36	543.48	41.77	3	3
1536	Zhu et al, 2016	nitrogen deposition	MBC (microbial biomass carbon)	Eucalyptus urophylla	ECM	374.396	25.1026	369.565	41.8377	3	3
1537	Zhang et al, 2012	nitrogen deposition	MBC (microbial biomass carbon)	Eucalyptus citriodora	ECM	288	36.8927	279	42.262	3	3
1538	Guo et al, 2013	nitrogen deposition	MBC (microbial biomass carbon)	Piuns tabulaeformis	ECM	250	42.3729	254.237	42.3729	3	3
1539	LiB et al, 2019	nitrogen deposition	MBC (microbial biomass carbon)	Larix gmelinii	ECM	587.629	51.031	655.67	45.361	3	3
1540	Xu et al, 2014	nitrogen deposition	MBC (microbial biomass carbon)	Populus deltoides	ECM	162.712	13.56	90.678	45.762	4	4
1541	Lee et al, 2003	nitrogen deposition	MBC (microbial biomass carbon)	Pinus taeda	ECM	727.119	20.339	864.407	45.762	4	4
1542	Zhao et al, 2018	nitrogen deposition	MBC (microbial biomass carbon)	Pinus tabulaeformis	ECM	397.152	27.6383	381.649	46.0656	3	3
1543	Lee et al, 2003	nitrogen deposition	MBC (microbial biomass carbon)	Populus deltoides	ECM	188.136	8.474	115.254	47.458	4	4
1544	Hao et al, 2020	nitrogen deposition	MBC (microbial biomass carbon)	Larix olgensis	ECM	589.71	44.12	621.83	49.6	4	4
1545	Zhu et al, 2017	nitrogen deposition	MBC (microbial biomass carbon)	Larix principis-rupprechtii	ECM	251.095	15.171	344.526	50.5707	3	3
1546	LiB et al, 2019	nitrogen deposition	MBC (microbial biomass carbon)	Larix gmelinii	ECM	587.629	51.031	752.062	51.031	3	3
1547	Hao et al, 2020	nitrogen deposition	MBC (microbial biomass carbon)	Pinus koraiensis	ECM	922.24	95.68	946.56	52.24	4	4
1548	Zhou et al, 2017	nitrogen deposition	MBC (microbial biomass carbon)	Castanopsis carlesii	ECM	203.45	51.1	285.3	53.7	4	4
1549	Cui et al, 2021	nitrogen deposition	MBC (microbial biomass carbon)	Pinus taiwanensis	ECM	283.83	53.21	437.41	59.25	4	4
1550	Zhou et al, 2017	nitrogen deposition	MBC (microbial biomass carbon)	Castanopsis carlesii	ECM	203.45	51.1	362.1	59.7	4	4
1551	LiB et al, 2019	nitrogen deposition	MBC (microbial biomass carbon)	Quercus mongolica	ECM	417.526	39.69	570.619	62.371	3	3
1552	Wei et al, 2018	nitrogen deposition	MBC (microbial biomass carbon)	Larix gmelinii	ECM	300.9	76.6	288.9	62.4	3	3
1553	Hao et al, 2020	nitrogen deposition	MBC (microbial biomass carbon)	Betula platyphylla	ECM	421.13	27.02	590.36	66.32	4	4
1554	Hao et al, 2020	nitrogen deposition	MBC (microbial biomass carbon)	Fraxinus mandschurica	AM	612.91	90.1	898.93	66.68	4	4
1555	Hao et al, 2020	nitrogen deposition	MBC (microbial biomass carbon)	Fraxinus mandschurica	AM	589.71	44.12	757.73	69.14	4	4
1556	Wei et al, 2018	nitrogen deposition	MBC (microbial biomass carbon)	Larix gmelinii	ECM	300.9	76.6	527.3	70.4	3	3
1557	Yang et al, 2018	nitrogen deposition	MBC (microbial biomass carbon)	Larix gmelinii	ECM	934.615	259.816	496.154	79.9411	3	3
1558	Hu et al, 2010	nitrogen deposition	MBC (microbial biomass carbon)	Larix gmelinii	ECM	972.816	110.979	739.806	80.717	3	3
1559	Guo et al, 2013	nitrogen deposition	MBC (microbial biomass carbon)	Piuns tabulaeformis	ECM	250	42.3729	211.864	88.9831	3	3
1560	Guo et al, 2013	nitrogen deposition	MBC (microbial biomass carbon)	Piuns tabulaeformis	ECM	313.559	59.322	258.475	88.9831	3	3
1561	Hao et al, 2020	nitrogen deposition	MBC (microbial biomass carbon)	Larix olgensis	ECM	922.24	95.68	934.35	90.52	4	4
1562	Cui et al, 2021	nitrogen deposition	MBC (microbial biomass carbon)	Pinus taiwanensis	ECM	283.83	53.21	360.33	98.88	4	4
1563	Wei et al, 2018	nitrogen deposition	MBC (microbial biomass carbon)	Larix gmelinii	ECM	300.9	76.6	433.2	100.5	3	3
1564	Cui et al, 2021	nitrogen deposition	MBC (microbial biomass carbon)	Pinus taiwanensis	ECM	543.98	45.42	682.61	119.04	4	4
1565	Yang et al, 2018	nitrogen deposition	MBC (microbial biomass carbon)	Larix gmelinii	ECM	484.615	139.898	346.154	119.912	3	3
1566	Cui et al, 2021	nitrogen deposition	MBC (microbial biomass carbon)	Pinus taiwanensis	ECM	543.98	45.42	616.18	127.69	4	4
1567	Hao et al, 2020	nitrogen deposition	MBC (microbial biomass carbon)	Betula platyphylla	ECM	922.24	95.68	1170.34	147.22	4	4
1568	Hu et al, 2010	nitrogen deposition	MBC (microbial biomass carbon)	Larix gmelinii	ECM	466.019	110.986	372.816	151.343	3	3
1569	Li et al, 2020	nitrogen deposition	MBC (microbial biomass carbon)	Larix principis-rupprechtii	ECM	708.94	279.51	531.02	213.17	3	3
1570	Li et al, 2020	nitrogen deposition	MBC (microbial biomass carbon)	Larix principis-rupprechtii	ECM	1658.73	401.07	1260.02	254.26	3	3
1571	Li et al, 2020	nitrogen deposition	MBC (microbial biomass carbon)	Larix principis-rupprechtii	ECM	1658.73	401.07	1701.08	266.02	3	3
1572	Li et al, 2020	nitrogen deposition	MBC (microbial biomass carbon)	Larix principis-rupprechtii	ECM	1211.04	372.8	964.09	286.68	3	3
1573	Li et al, 2020	nitrogen deposition	MBC (microbial biomass carbon)	Larix principis-rupprechtii	ECM	708.94	279.51	728.87	296.08	3	3
1574	Li et al, 2020	nitrogen deposition	MBC (microbial biomass carbon)	Larix principis-rupprechtii	ECM	1211.04	372.8	1126.6	296.52	3	3
1575	Zhao et al, 2016	nitrogen deposition	SR (soil respiration)	Pinus sylvestris	ECM	0.0462054	0.0087053	0.0475446	0.0040179	3	3
1576	Zhao et al, 2016	nitrogen deposition	SR (soil respiration)	Pinus sylvestris	ECM	0.065625	0.0046875	0.0314732	0.0066964	3	3
1577	Zhang et al, 2019	nitrogen deposition	SR (soil respiration)	Torreya grandis	AM	2.99331	0.06689	3.89632	0.01672	3	3
1578	Jackson et al, 2009	nitrogen deposition	SR (soil respiration)	Pinus taeda	ECM	0.172619	0.00859152	0.131944	0.0240563	3	3
1579	Jiao et al, 2021	nitrogen deposition	SR (soil respiration)	Cunninghamia lanceolata	AM	4.72	0.08	4.65	0.03	3	3
1580	Hao et al, 2020	nitrogen deposition	SR (soil respiration)	Larix olgensis	ECM	1.66667	0.03508	1.5	0.03508	4	4
1581	Hao et al, 2020	nitrogen deposition	SR (soil respiration)	Larix olgensis	ECM	1.61404	0.03508	1.32456	0.0351	4	4
1582	Jiao et al, 2021	nitrogen deposition	SR (soil respiration)	Cunninghamia lanceolata	AM	4.42	0.03	4.48	0.06	3	3
1583	Jiao et al, 2021	nitrogen deposition	SR (soil respiration)	Cunninghamia lanceolata	AM	4.72	0.08	4.59	0.06	3	3
1584	Zhang et al, 2019	nitrogen deposition	SR (soil respiration)	Torreya grandis	AM	2.99331	0.06689	4.76589	0.06689	3	3
1585	Jiao et al, 2021	nitrogen deposition	SR (soil respiration)	Cunninghamia lanceolata	AM	4.42	0.03	4.4	0.07	3	3
1586	Hao et al, 2020	nitrogen deposition	SR (soil respiration)	Fraxinus mandschurica	AM	1.61404	0.03508	1.76316	0.07018	4	4
1587	Lagomarsino et al, 2013	nitrogen deposition	SR (soil respiration)	Populus alba	ECM	0.75	0.0895888	0.931034	0.0895888	3	3
1588	Lagomarsino et al, 2013	nitrogen deposition	SR (soil respiration)	Populus alba	ECM	0.75	0.0895888	0.646552	0.0895888	3	3
1589	Song et al, 2020	nitrogen deposition	SR (soil respiration)	Larix principis-rupprechtii	ECM	2.69886	0.295245	2.35795	0.0984151	3	3
1590	Lagomarsino et al, 2006	nitrogen deposition	SR (soil respiration)	Populus alba	ECM	1.14	0.2	0.74	0.1	3	3
1591	WangA et al, 2019	nitrogen deposition	SR (soil respiration)	Picea balfouriana	ECM	0.49	0.0866025	0.59	0.103923	3	3
1592	Hao et al, 2020	nitrogen deposition	SR (soil respiration)	Pinus koraiensis	ECM	1.61404	0.03508	1.40351	0.10526	4	4
1593	Hu et al, 2010	nitrogen deposition	SR (soil respiration)	Larix gmelinii	ECM	0.394619	0.0497081	0.33722	0.111845	3	3
1594	Zhang et al, 2012	nitrogen deposition	SR (soil respiration)	Pinus elliotti	ECM	1.44548	0.27415	1.11526	0.11215	3	3
1595	WangA et al, 2019	nitrogen deposition	SR (soil respiration)	Abies smithii	ECM	0.4	0.103923	0.42	0.121244	3	3
1596	Hao et al, 2020	nitrogen deposition	SR (soil respiration)	Pinus koraiensis	ECM	1.66667	0.03508	1.55263	0.12282	4	4
1597	Zhang et al, 2012	nitrogen deposition	SR (soil respiration)	Pinus elliotti	ECM	1.44548	0.27415	1.23988	0.13084	3	3
1598	Lagomarsino et al, 2013	nitrogen deposition	SR (soil respiration)	Populus	AM	0.690265	0.0919673	0.663717	0.137951	3	3
1599	He et al, 2021	nitrogen deposition	SR (soil respiration)	Pinus koraiensis	ECM	6.49	0.19	6.46	0.14	3	3
1600	Hao et al, 2020	nitrogen deposition	SR (soil respiration)	Pinus koraiensis	ECM	2.08772	0.08772	1.84211	0.14034	4	4
1601	Hao et al, 2020	nitrogen deposition	SR (soil respiration)	Betula platyphylla	ECM	1.66667	0.03508	1.86842	0.14036	4	4
1602	Song et al, 2020	nitrogen deposition	SR (soil respiration)	Larix principis-rupprechtii	ECM	3.09659	0.246038	2.64205	0.147605	3	3
1603	Song et al, 2020	nitrogen deposition	SR (soil respiration)	Larix principis-rupprechtii	ECM	2.69886	0.295245	2.69886	0.147623	3	3
1604	Hu et al, 2010	nitrogen deposition	SR (soil respiration)	Larix gmelinii	ECM	1.17668	0.124275	1.05471	0.14913	3	3
1605	WangA et al, 2019	nitrogen deposition	SR (soil respiration)	Picea balfouriana	ECM	0.4	0.103923	0.51	0.155885	3	3
1606	WangA et al, 2019	nitrogen deposition	SR (soil respiration)	Picea balfouriana	ECM	0.49	0.0866025	0.84	0.155885	3	3
1607	WangA et al, 2019	nitrogen deposition	SR (soil respiration)	Abies smithii	ECM	0.49	0.0866025	0.84	0.155885	3	3
1608	He et al, 2021	nitrogen deposition	SR (soil respiration)	Pinus koraiensis	ECM	6.49	0.19	6.5	0.16	3	3
1609	Zhang et al, 2012	nitrogen deposition	SR (soil respiration)	Pinus elliotti	ECM	1.44548	0.27415	1.19626	0.16823	3	3
1610	WangA et al, 2019	nitrogen deposition	SR (soil respiration)	Abies smithii	ECM	0.4	0.103923	0.61	0.173205	3	3
1611	Marty et al, 2019	nitrogen deposition	SR (soil respiration)	Picea mariana	ECM	2.44868	0.70381	1.97947	0.17596	3	3
1612	Xiang et al, 2014	nitrogen deposition	SR (soil respiration)	Eucalyptus grandis	ECM	1.87342	0.31645	2.02532	0.17721	3	3
1613	ChenB et al, 2018	nitrogen deposition	SR (soil respiration)	Pinus tabuliformis	ECM	2.04	0.2	1.99	0.19	4	4
1614	Hao et al, 2020	nitrogen deposition	SR (soil respiration)	Betula platyphylla	ECM	2.34211	0.35086	2.74561	0.193	4	4
1615	Song et al, 2020	nitrogen deposition	SR (soil respiration)	Larix principis-rupprechtii	ECM	3.69318	0.147623	3.40909	0.19683	3	3
1616	Song et al, 2020	nitrogen deposition	SR (soil respiration)	Larix principis-rupprechtii	ECM	3.69318	0.147623	3.09659	0.19683	3	3
1617	ChenB et al, 2018	nitrogen deposition	SR (soil respiration)	Pinus tabuliformis	ECM	2.54	0.26	2.57	0.21	4	4
1618	Fan et al, 2014	nitrogen deposition	SR (soil respiration)	Cunninghamia lanceolata	AM	3.7037	0.213839	2.77778	0.213822	3	3
1619	Fan et al, 2014	nitrogen deposition	SR (soil respiration)	Cunninghamia lanceolata	AM	3.7037	0.213839	3.39506	0.213839	3	3
1620	Fan et al, 2014	nitrogen deposition	SR (soil respiration)	Cunninghamia lanceolata	AM	3.7037	0.213839	3.02469	0.213839	3	3
1621	Chen et al, 2020	nitrogen deposition	SR (soil respiration)	Pinus massoniana	ECM	6.17	0.34	6.07	0.23	3	3
1622	Yang et al, 2021	nitrogen deposition	SR (soil respiration)	Pinus tabulaeformis	ECM	2.70531	0.34784	2.10628	0.23188	4	4
1623	Yang et al, 2021	nitrogen deposition	SR (soil respiration)	Pinus tabulaeformis	ECM	2.70531	0.34784	1.97101	0.2319	4	4
1624	Yang et al, 2021	nitrogen deposition	SR (soil respiration)	Pinus tabulaeformis	ECM	2.70531	0.34784	1.91304	0.2319	4	4
1625	Xiang et al, 2014	nitrogen deposition	SR (soil respiration)	Eucalyptus grandis	ECM	1.87342	0.31645	2.29114	0.24051	3	3
1626	Zhao et al, 2018	nitrogen deposition	SR (soil respiration)	Pinus tabulaeformis	ECM	2.22221	0.187235	2.23348	0.262146	3	3
1627	Zhao et al, 2018	nitrogen deposition	SR (soil respiration)	Pinus tabulaeformis	ECM	2.22221	0.187235	2.26027	0.262163	3	3
1628	Hao et al, 2020	nitrogen deposition	SR (soil respiration)	Larix olgensis	ECM	2.34211	0.35086	1.87719	0.26316	4	4
1629	Lagomarsino et al, 2013	nitrogen deposition	SR (soil respiration)	populus nigra	AM	2.06897	0.268767	1.93966	0.268767	3	3
1630	ChenC et al, 2018	nitrogen deposition	SR (soil respiration)	Cinnamomum camphora	AM	2.88	0.450333	1.82	0.277128	3	3
1631	He et al, 2021	nitrogen deposition	SR (soil respiration)	Pinus koraiensis	ECM	6.49	0.19	6.35	0.28	3	3
1632	Hao et al, 2020	nitrogen deposition	SR (soil respiration)	Fraxinus mandschurica	AM	2.08772	0.08772	1.97368	0.28072	4	4
1633	Zhao et al, 2018	nitrogen deposition	SR (soil respiration)	Pinus tabulaeformis	ECM	2.22221	0.187235	2.55263	0.299593	3	3
1634	ChenC et al, 2018	nitrogen deposition	SR (soil respiration)	Cinnamomum camphora	AM	2.88	0.450333	1.86	0.311769	3	3
1635	ChenC et al, 2018	nitrogen deposition	SR (soil respiration)	Cinnamomum camphora	AM	2.88	0.450333	2	0.311769	3	3
1636	Hao et al, 2020	nitrogen deposition	SR (soil respiration)	Betula platyphylla	ECM	2.08772	0.08772	2.33333	0.3158	4	4
1637	ChenB et al, 2018	nitrogen deposition	SR (soil respiration)	Pinus tabuliformis	ECM	2.17	0.19	3.39	0.32	4	4
1638	Jing et al, 2016	nitrogen deposition	SR (soil respiration)	Fraxinus mandshurica	AM	3.10777	0.26065	4.37093	0.3208	4	4
1639	Xiang et al, 2014	nitrogen deposition	SR (soil respiration)	Eucalyptus grandis	ECM	1.87342	0.31645	2.49367	0.34177	3	3
1640	Song et al, 2020	nitrogen deposition	SR (soil respiration)	Larix principis-rupprechtii	ECM	3.09659	0.246038	2.95455	0.344436	3	3
1641	Ceng et al, 2016	nitrogen deposition	SR (soil respiration)	Pinus massoniana	ECM	3.93	0.38	3.95	0.35	9	9
1642	ChenB et al, 2018	nitrogen deposition	SR (soil respiration)	Pinus tabuliformis	ECM	2.97	0.44	3.02	0.36	4	4
1643	Gao et al, 2016	nitrogen deposition	SR (soil respiration)	Pinus koraiensis	ECM	3.09	0.398372	2.78	0.363731	3	3
1644	Hao et al, 2020	nitrogen deposition	SR (soil respiration)	Fraxinus mandschurica	AM	2.34211	0.35086	2.77193	0.38596	4	4
1645	Gao et al, 2016	nitrogen deposition	SR (soil respiration)	Pinus koraiensis	ECM	3.09	0.398372	3.06	0.398372	3	3
1646	Gao et al, 2016	nitrogen deposition	SR (soil respiration)	Pinus koraiensis	ECM	3.09	0.398372	2.9	0.398372	3	3
1647	Fan et al, 2014	nitrogen deposition	SR (soil respiration)	Cunninghamia lanceolata	AM	3	0.586663	1.98387	0.419052	3	3
1648	Chen et al, 2020	nitrogen deposition	SR (soil respiration)	Pinus massoniana	ECM	6.17	0.34	7.79	0.42	3	3
1649	ChenB et al, 2018	nitrogen deposition	SR (soil respiration)	Pinus tabuliformis	ECM	3.01	0.58	3.25	0.48	4	4
1650	Zhou et al, 2015	nitrogen deposition	SR (soil respiration)	Populus deltoides	ECM	6.69623	0.61448	5.34368	0.499264	3	3
1651	Fan et al, 2014	nitrogen deposition	SR (soil respiration)	Cunninghamia lanceolata	AM	3	0.586663	2.66129	0.502849	3	3
1652	Fan et al, 2014	nitrogen deposition	SR (soil respiration)	Cunninghamia lanceolata	AM	3	0.586663	2.27419	0.502866	3	3
1653	Lagomarsino et al, 2013	nitrogen deposition	SR (soil respiration)	Populus alba	ECM	3.21239	0.50582	2.92035	0.50582	3	3
1654	Vose et al, 1995	nitrogen deposition	SR (soil respiration)	Pinus ponderosa	ECM	1.704	0.630466	2.126	0.514419	3	3
1655	Vose et al, 1995	nitrogen deposition	SR (soil respiration)	Pinus ponderosa	ECM	1.704	0.630466	1.071	0.514419	3	3
1656	ChenB et al, 2018	nitrogen deposition	SR (soil respiration)	Pinus tabuliformis	ECM	2.52	0.49	2.5	0.53	4	4
1657	Li et al, 2020	nitrogen deposition	SR (soil respiration)	Torreya grandis	AM	6.02	0.242487	5.48	0.571577	3	3
1658	Lagomarsino et al, 2013	nitrogen deposition	SR (soil respiration)	populus nigra	AM	2.06897	0.268767	4.31897	0.582327	3	3
1659	Li et al, 2020	nitrogen deposition	SR (soil respiration)	Torreya grandis	AM	6.02	0.242487	6.09	0.588897	3	3
1660	Chen et al, 2020	nitrogen deposition	SR (soil respiration)	Pinus massoniana	ECM	6.17	0.34	9.24	0.59	3	3
1661	Ceng et al, 2016	nitrogen deposition	SR (soil respiration)	Pinus massoniana	ECM	3.93	0.38	3.85	0.61	9	9
1662	Ceng et al, 2016	nitrogen deposition	SR (soil respiration)	Pinus massoniana	ECM	3.93	0.38	3.47	0.68	9	9
1663	Zhou et al, 2015	nitrogen deposition	SR (soil respiration)	Populus deltoides	ECM	6.69623	0.61448	7.60532	0.691279	3	3
1664	Lagomarsino et al, 2006	nitrogen deposition	SR (soil respiration)	Populus alba	ECM	2.27	1.74	1.58	0.7	4	4
1665	Li et al, 2014	nitrogen deposition	SR (soil respiration)	Pinus koraiensis	ECM	4	0.9	3.81	0.7	3	3
1666	ChenB et al, 2018	nitrogen deposition	SR (soil respiration)	Pinus tabuliformis	ECM	2.31	0.12	3.25	0.74	4	4
1667	Zhou et al, 2015	nitrogen deposition	SR (soil respiration)	Populus deltoides	ECM	6.69623	0.61448	5.38803	0.921711	3	3
1668	Li et al, 2014	nitrogen deposition	SR (soil respiration)	Pinus koraiensis	ECM	2.27	1.74	3.49	0.98	4	4
1669	Yuan et al, 2012	nitrogen deposition	SR (soil respiration)	Cunninghamia lanceolata	AM	19.23	1.64	20.59	1.15	3	3
1670	Yuan et al, 2012	nitrogen deposition	SR (soil respiration)	Cunninghamia lanceolata	AM	30.19	2.35	27.27	1.28	3	3
1671	Yuan et al, 2012	nitrogen deposition	SR (soil respiration)	Cunninghamia lanceolata	AM	19.23	1.64	16.26	1.3	3	3
1672	Yuan et al, 2012	nitrogen deposition	SR (soil respiration)	Cunninghamia lanceolata	AM	30.19	2.35	29.88	1.41	3	3
1673	Yuan et al, 2012	nitrogen deposition	SR (soil respiration)	Cunninghamia lanceolata	AM	19.23	1.64	18.03	1.47	3	3
1674	ChenB et al, 2018	nitrogen deposition	SR (soil respiration)	Pinus tabuliformis	ECM	2.61	0.29	4.84	1.49	4	4
1675	ChenB et al, 2018	nitrogen deposition	SR (soil respiration)	Pinus tabuliformis	ECM	2.81	0.29	3.87	1.64	4	4
1676	Li et al, 2014	nitrogen deposition	SR (soil respiration)	Pinus koraiensis	ECM	2.27	1.74	3.77	1.72	4	4
1677	Vose et al, 1995	nitrogen deposition	SR (soil respiration)	Pinus ponderosa	ECM	3.733	1.81692	8.584	1.81692	3	3
1678	Vose et al, 1995	nitrogen deposition	SR (soil respiration)	Pinus ponderosa	ECM	3.733	1.81692	5.636	2.09751	3	3
1679	Jing et al, 2021	nitrogen deposition	SR (soil respiration)	Pinus tabulaeformis	ECM	13.8272	4.1974	21.6049	2.2222	4	4
1680	Yuan et al, 2012	nitrogen deposition	SR (soil respiration)	Cunninghamia lanceolata	AM	45.19	3.51	44.92	2.27	3	3
1681	Vose et al, 1995	nitrogen deposition	SR (soil respiration)	Pinus ponderosa	ECM	1.602	2.13215	5.641	2.46124	3	3
1682	Vose et al, 1995	nitrogen deposition	SR (soil respiration)	Pinus ponderosa	ECM	1.602	2.13215	1.485	2.46124	3	3
1683	Yuan et al, 2012	nitrogen deposition	SR (soil respiration)	Cunninghamia lanceolata	AM	45.19	3.51	42.49	2.64	3	3
1684	Quan et al, 2015	nitrogen deposition	SR (soil respiration)	Pinus tabuliformis	ECM	92.2843	8.2237	96.8528	2.7411	4	4
1685	Yuan et al, 2012	nitrogen deposition	SR (soil respiration)	Cunninghamia lanceolata	AM	30.19	2.35	34.61	2.95	3	3
1686	Yuan et al, 2012	nitrogen deposition	SR (soil respiration)	Cunninghamia lanceolata	AM	45.19	3.51	51.11	3.18	3	3
1687	Jing et al, 2021	nitrogen deposition	SR (soil respiration)	Pinus tabulaeformis	ECM	13.8272	4.1974	8.39506	3.45688	4	4
1688	Jing et al, 2021	nitrogen deposition	SR (soil respiration)	Pinus tabulaeformis	ECM	13.8272	4.1974	12.3457	4.6914	4	4
1689	Song et al, 2017	nitrogen deposition	SR (soil respiration)	Pinus koraiensis	ECM	76.3	6.4846	110.6	6.26099	5	5
1690	Song et al, 2017	nitrogen deposition	SR (soil respiration)	Pinus koraiensis	ECM	76.3	6.4846	79.4	6.93181	5	5
1691	Song et al, 2017	nitrogen deposition	SR (soil respiration)	Pinus koraiensis	ECM	76.3	6.4846	87.9	6.93181	5	5
1692	Quan et al, 2015	nitrogen deposition	SR (soil respiration)	Larix principis-rupprechtii	ECM	70.3553	5.4823	72.1827	8.2234	4	4
1693	Quan et al, 2015	nitrogen deposition	SR (soil respiration)	Quercus liaotungensis	ECM	112.386	11.878	107.817	10.051	4	4
1694	Li et al, 2019	nitrogen deposition	SR (soil respiration)	Picea asperata	ECM	36.04	7.54	46.08	10.78	4	4
1695	Sun et al, 2014	nitrogen deposition	SR (soil respiration)	Larix principis-rupprechtii	ECM	408.397	13.2218	347.328	13.2218	3	3
1696	Sun et al, 2014	nitrogen deposition	SR (soil respiration)	Larix principis-rupprechtii	ECM	408.397	13.2218	351.145	13.2218	3	3
1697	Bowden et al, 2004	nitrogen deposition	SR (soil respiration)	Pinus resinosa	ECM	480.5	21.2	417.7	15.7	3	3
1698	Lee et al, 2003	nitrogen deposition	SR (soil respiration)	Populus deltoides	ECM	868.475	10.464	732.135	17.442	4	4
1699	Drake et al, 2012	nitrogen deposition	SR (soil respiration)	Pinus taeda	ECM	130.424	30.4536	76.5965	18.3991	3	3
1700	WangB et al, 2016	nitrogen deposition	SR (soil respiration)	Pinus tabulaeformis	ECM	333.014	22.967	338.756	20.096	4	4
1701	Lee et al, 2003	nitrogen deposition	SR (soil respiration)	Populus deltoides	ECM	868.475	10.464	819.492	24.42	4	4
1702	Bowden et al, 2004	nitrogen deposition	SR (soil respiration)	Pinus resinosa	ECM	480.5	21.2	372.9	26.3	3	3
1703	Lee et al, 2003	nitrogen deposition	SR (soil respiration)	Pinus taeda	ECM	729.72	20.93	689.31	27.908	4	4
1704	Comeau et al, 2016	nitrogen deposition	SR (soil respiration)	Elaeis guineensis	AM	328.4	30.1377	256.2	31.3501	3	3
1705	Bowden et al, 2004	nitrogen deposition	SR (soil respiration)	Pinus resinosa	ECM	429.9	41.9	358.7	32	3	3
1706	Zheng et al, 2013	nitrogen deposition	SR (soil respiration)	Cinnamomum camphora	AM	765.766	102.102	357.357	33.033	3	3
1707	Comeau et al, 2016	nitrogen deposition	SR (soil respiration)	Elaeis guineensis	AM	285.2	32.7358	214.5	33.6018	3	3
1708	Tang et al, 2012	nitrogen deposition	SR (soil respiration)	Abies faxoniana	ECM	699.516	13.0751	640.678	34.8668	5	5
1709	Zheng et al, 2013	nitrogen deposition	SR (soil respiration)	Cinnamomum camphora	AM	636.637	75.0751	534.535	39.039	3	3
1710	WangB et al, 2016	nitrogen deposition	SR (soil respiration)	Pinus tabulaeformis	ECM	333.014	22.967	376.077	40.191	4	4
1711	Zheng et al, 2013	nitrogen deposition	SR (soil respiration)	Cinnamomum camphora	AM	765.766	102.102	366.366	42.042	3	3
1712	Zheng et al, 2013	nitrogen deposition	SR (soil respiration)	Cinnamomum camphora	AM	765.766	102.102	384.384	45.045	3	3
1713	Lee et al, 2003	nitrogen deposition	SR (soil respiration)	Pinus taeda	ECM	729.72	20.93	656.316	45.348	4	4
1714	Bowden et al, 2004	nitrogen deposition	SR (soil respiration)	Pinus resinosa	ECM	429.9	41.9	428.7	47.1	3	3
1715	Zheng et al, 2013	nitrogen deposition	SR (soil respiration)	Cinnamomum camphora	AM	636.637	75.0751	486.486	48.048	3	3
1716	Comeau et al, 2016	nitrogen deposition	SR (soil respiration)	Elaeis guineensis	AM	395.1	93.7039	275.9	51.0955	3	3
1717	Lee et al, 2003	nitrogen deposition	SR (soil respiration)	Populus deltoides	ECM	868.475	10.464	730.095	52.324	4	4
1718	Tang et al, 2012	nitrogen deposition	SR (soil respiration)	Picea asperata	ECM	640.678	10.8959	512.107	58.8378	5	5
1719	Fan et al, 2020	nitrogen deposition	SR (soil respiration)	Cunninghamia lanceolata	AM	5842.7	202.24	4966.29	67.42	3	3
1720	WangB et al, 2016	nitrogen deposition	SR (soil respiration)	Pinus tabulaeformis	ECM	333.014	22.967	482.297	74.641	4	4
1721	Zheng et al, 2013	nitrogen deposition	SR (soil respiration)	Cinnamomum camphora	AM	636.637	75.0751	510.511	75.0751	3	3
1722	Lee et al, 2003	nitrogen deposition	SR (soil respiration)	Pinus taeda	ECM	729.72	20.93	725.642	76.744	4	4
1723	Comeau et al, 2016	nitrogen deposition	SR (soil respiration)	Elaeis guineensis	AM	313	82.2724	349.8	81.7528	3	3
1724	Comeau et al, 2016	nitrogen deposition	SR (soil respiration)	Elaeis guineensis	AM	745.1	64.9519	658	85.2169	3	3
1725	Comeau et al, 2016	nitrogen deposition	SR (soil respiration)	Elaeis guineensis	AM	304.4	109.119	357.5	90.7595	3	3
1726	Fan et al, 2020	nitrogen deposition	SR (soil respiration)	Castanopsis carlesii	ECM	5462.69	119.4	4985.07	119.41	3	3

## Sheet: Supplementary Data 1b
Database 1: The database of carbon-related variables under CO2 enrichment effects
No	Reference	Treatment	Variables	Tree species	Mycorrhizal fungi type	Mean in Control	Standard deviation in Control	Mean in treatment group	Standard deviation in treatment group	Replicates in Control	Replicates in treatment group
1	Han et al, 2000	CO2 enrichment	TB (total biomass)	Pinus sylvestrifomis	ECM	0.23	0.02	0.26	0.01	3	3
2	Han et al, 2000	CO2 enrichment	TB (total biomass)	Pinus sylvestrifomis	ECM	0.23	0.02	0.31	0.02	3	3
3	Han et al, 2000	CO2 enrichment	TB (total biomass)	Pinus koraiensis	ECM	0.57	0.02	0.63	0.02	3	3
4	Han et al, 2000	CO2 enrichment	TB (total biomass)	Phellodendron amurense	AM	1.64	0.02	1.83	0.02	3	3
5	Han et al, 2000	CO2 enrichment	TB (total biomass)	Phellodendron amurense	AM	1.64	0.02	2.36	0.02	3	3
6	Winter et al,2000	CO2 enrichment	TB (total biomass)	Virola surinamensis	AM	0.08	0.026	0.077	0.03	5	5
7	Han et al, 2000	CO2 enrichment	TB (total biomass)	Pinus koraiensis	ECM	0.57	0.02	0.67	0.03	3	3
8	Miao et al, 1992	CO2 enrichment	TB (total biomass)	Betula populifolia	ECM	0.793651	0.0549857	1.14286	0.0549753	3	3
9	Miao et al, 1992	CO2 enrichment	TB (total biomass)	Acer rubrum	AM	0.285714	0.0549857	0.349206	0.0549857	3	3
10	Atkin et al, 1999	CO2 enrichment	TB (total biomass)	Acacia aneura	AM	0.76	0.1	0.6	0.07	8	8
11	Schortemeyer et al, 2002	CO2 enrichment	TB (total biomass)	Acacia aneura	AM	0.19	0.06	0.37	0.08	4	4
12	Chae et al, 2016	CO2 enrichment	TB (total biomass)	Quercus mongolica	ECM	1.295	0.108	1.696	0.081	4	4
13	Chae et al, 2016	CO2 enrichment	TB (total biomass)	Quercus acutissima	ECM	0.765	0.071	0.788	0.087	4	4
14	Han et al, 2011	CO2 enrichment	TB (total biomass)	Fagus sylvatica	AM	0.319088	0.045584	0.547009	0.091168	4	4
15	Miao et al, 1992	CO2 enrichment	TB (total biomass)	Acer rubrum	AM	0.920635	0.164952	1.26984	0.109968	3	3
16	Miao et al, 1992	CO2 enrichment	TB (total biomass)	Acer rubrum	AM	0.349206	0.0549857	0.380952	0.109971	3	3
17	Miao et al, 1992	CO2 enrichment	TB (total biomass)	Betula populifolia	ECM	1.01587	0.0549926	1.01587	0.109985	3	3
18	Hatenschwiler et al, 1997	CO2 enrichment	TB (total biomass)	Picea abies	ECM	5.16	0.121244	5.44	0.121244	3	3
19	Miao et al, 1992	CO2 enrichment	TB (total biomass)	Betula populifolia	ECM	4.50794	0.109968	5.49206	0.164961	3	3
20	Atkin et al, 1999	CO2 enrichment	TB (total biomass)	Acacia coriacea	AM	0.85	0.1	1.35	0.18	8	8
21	Olesniewicz et al, 1999	CO2 enrichment	TB (total biomass)	Robinia pseudoacacia	ECM	1.201	0.254611	3.472	0.183597	3	3
22	Davis et al, 2002	CO2 enrichment	TB (total biomass)	Quercus margaretta	ECM	0.371429	0.0659825	0.47619	0.189701	3	3
23	Chae et al, 2016	CO2 enrichment	TB (total biomass)	Quercus serrata	ECM	2.602	0.445	1.58	0.194	4	4
24	Schortemeyer et al, 2002	CO2 enrichment	TB (total biomass)	Acacia irrorata	AM	1.16	0.2	1.91	0.2	8	8
25	Atkin et al, 1999	CO2 enrichment	TB (total biomass)	Acacia tetragonophylla	AM	1.6	0.8	2.5	0.2	4	4
26	Miao et al, 1992	CO2 enrichment	TB (total biomass)	Betula populifolia	ECM	2.34921	0.0549753	3.61905	0.219936	3	3
27	Cortes et al, 2004	CO2 enrichment	TB (total biomass)	Quercus ilex	ECM	1.31955	0.175803	1.3985	0.234398	3	3
28	Hatenschwiler et al, 1997	CO2 enrichment	TB (total biomass)	Picea abies	ECM	5.16	0.121244	5.99	0.242487	3	3
29	Winter et al, 1999	CO2 enrichment	TB (total biomass)	Virola surinamensis	AM	4.06	0.5	5.16	0.26	4	4
30	Chen et al, 2021	CO2 enrichment	TB (total biomass)	Populus cathayana	AM	2.98667	0.261263	2.77333	0.261287	6	6
31	Chae et al, 2016	CO2 enrichment	TB (total biomass)	Quercus variabilis	ECM	3.976	0.229	3.651	0.263	4	4
32	Winter et al, 1999	CO2 enrichment	TB (total biomass)	Antirrhoea trichantha	ECM	1.31	0.35	2.7	0.27	5	5
33	Fondo et al, 2010	CO2 enrichment	TB (total biomass)	Betula papyrifera	ECM	6.12245	0.408163	7.48299	0.272109	3	3
34	Miao et al, 1992	CO2 enrichment	TB (total biomass)	Acer rubrum	AM	1.84127	0.164961	3.07937	0.274928	3	3
35	Ambebe et al, 2009	CO2 enrichment	TB (total biomass)	Betula papyrifera	ECM	2.49077	0.18451	2.39852	0.27676	4	4
36	Cortes et al, 2004	CO2 enrichment	TB (total biomass)	Quercus ilex	ECM	1.31955	0.175803	2.05263	0.312549	3	3
37	Bazzaz et al, 1990	CO2 enrichment	TB (total biomass)	Fagus grandifolia	ECM	3.87603	0.56388	2.16271	0.37594	4	4
38	Chen et al, 2021	CO2 enrichment	TB (total biomass)	Populus cathayana	AM	2.77333	0.130656	4.69333	0.391918	6	6
39	Winter et al, 1999	CO2 enrichment	TB (total biomass)	Castilla elastica	AM	2.8	0.26	5.23	0.42	4	4
40	Ambebe et al, 2013	CO2 enrichment	TB (total biomass)	Betula papyrifera	ECM	5.02392	1.43541	5.88517	0.43062	3	3
41	Atkin et al, 1999	CO2 enrichment	TB (total biomass)	Acacia colei	AM	1.34	0.18	2.73	0.44	8	8
42	Volin et al, 2002	CO2 enrichment	TB (total biomass)	Acer saccharum	AM	2.10411	0.455547	2.33425	0.455547	3	3
43	Winter et al,2000	CO2 enrichment	TB (total biomass)	Ficus insipida	AM	2.204	0.404	2.644	0.47	5	5
44	Cortes et al, 2004	CO2 enrichment	TB (total biomass)	Quercus cerrioides	ECM	1.6015	0.410236	2.50376	0.507889	3	3
45	Zhao et al, 2011	CO2 enrichment	TB (total biomass)	Populus cathayana	AM	10.46	0.715542	10.44	0.514296	5	5
46	Cortes et al, 2004	CO2 enrichment	TB (total biomass)	Quercus cerrioides	ECM	1.6015	0.410236	1.51128	0.546964	3	3
47	Winter et al, 1999	CO2 enrichment	TB (total biomass)	Cecropia longipes	ECM	2.27	0.2	4.08	0.56	5	5
48	Atkin et al, 1999	CO2 enrichment	TB (total biomass)	Acacia melanoxylon	AM	2.29	0.35	6.68	0.56	8	8
49	Dusenge et al, 2020	CO2 enrichment	TB (total biomass)	Larix laricina	ECM	0.214286	0.112938	0.5	0.564691	10	10
50	Winter et al, 1999	CO2 enrichment	TB (total biomass)	Luehea seemannii	AM	2.04	0.47	3.18	0.64	4	4
51	Roden et al, 1997	CO2 enrichment	TB (total biomass)	Acmena smithii	AM	1.363	0.287	2.379	0.714	7	7
52	Coley et al, 2002	CO2 enrichment	TB (total biomass)	Virola surinamensis	AM	4.5	0.588897	4.3	0.744782	3	3
53	Kinney et al, 1997	CO2 enrichment	TB (total biomass)	Acer saccharum	AM	4.32432	0.756598	6.17761	0.756598	6	6
54	Lia et al, 2018	CO2 enrichment	TB (total biomass)	Acer saccharum	AM	5.96234	0.20921	19.3515	0.8368	3	3
55	Volin et al, 1998	CO2 enrichment	TB (total biomass)	Quercus rubra	ECM	8.32997	1.61784	7.39286	0.856516	3	3
56	Atkin et al, 1999	CO2 enrichment	TB (total biomass)	Acacia irrorata	AM	3.71	0.83	6.46	0.86	8	8
57	Ambebe et al, 2013	CO2 enrichment	TB (total biomass)	Betula papyrifera	ECM	3.01435	1.00479	5.88517	0.86124	3	3
58	Winter et al, 1999	CO2 enrichment	TB (total biomass)	Pseudobombax septenatum	AM	3.91	0.89	5.53	0.87	5	5
59	Dusenge et al, 2020	CO2 enrichment	TB (total biomass)	Picea mariana	ECM	0.892857	0.338816	3.03571	0.903526	10	10
60	Schortemeyer et al, 2002	CO2 enrichment	TB (total biomass)	Acacia tetragonophylla	AM	1	0.2	1	1	4	4
61	Wayne et al, 1998	CO2 enrichment	TB (total biomass)	Betula alleghaniensis	ECM	4.05797	0.45184	6.34783	1.00409	3	3
62	Ambebe et al, 2013	CO2 enrichment	TB (total biomass)	Betula papyrifera	ECM	7.32057	1.14833	8.32536	1.00478	3	3
63	Rochefort et al, 1992	CO2 enrichment	TB (total biomass)	Betula papyrifera	ECM	3.6376	1.67617	7.90465	1.00572	3	3
64	Zhao et al, 2011	CO2 enrichment	TB (total biomass)	Populus cathayana	AM	9.88	0.693181	13.67	1.00623	5	5
65	Bazzaz et al, 1990	CO2 enrichment	TB (total biomass)	Betula papyrifera	ECM	16.8572	2.0676	13.5456	1.1278	4	4
66	Bazzaz et al, 1993	CO2 enrichment	TB (total biomass)	Fraxinus americana	AM	25.1728	1.7143	23.1818	1.1428	6	6
67	Lia et al, 2018	CO2 enrichment	TB (total biomass)	Acer saccharum	AM	5.96234	0.20921	14.1213	1.1507	3	3
68	Roden et al, 1997	CO2 enrichment	TB (total biomass)	Doryphora sassafras	AM	2.471	1.075	3.496	1.196	7	7
69	Kitao et al, 2016	CO2 enrichment	TB (total biomass)	Acer mono	AM	2.04188	0.408088	3.06283	1.22421	3	3
70	Rasineni et al, 2011	CO2 enrichment	TB (total biomass)	Gmelina arborea	AM	7.05882	0.70588	12.8824	1.2352	4	4
71	Winter et al, 1999	CO2 enrichment	TB (total biomass)	Ficus insipida	AM	2	0.41	4.64	1.27	7	7
72	Bazzaz et al, 1990	CO2 enrichment	TB (total biomass)	Acer saccharum	AM	7.76923	3.57132	2.95449	1.31576	4	4
73	Winter et al, 1999	CO2 enrichment	TB (total biomass)	Tetragastris panamensis	AM	3.8	1.52	4.1	1.33	5	5
74	Kitao et al, 2016	CO2 enrichment	TB (total biomass)	Quercus mongolica	ECM	9.97382	3.80875	8.95288	1.36025	3	3
75	Volin et al, 1998	CO2 enrichment	TB (total biomass)	Populus tremuloides	AM	7.21728	0.999185	7.81863	1.37992	3	3
76	Lovelock et al, 1998	CO2 enrichment	TB (total biomass)	Swietenia macrophylla	AM	12.9	1.03923	12.3	1.38564	3	3
77	Lovelock et al, 1998	CO2 enrichment	TB (total biomass)	Calophyllum longifolium	ECM	16.9	1.38564	13.7	1.38564	3	3
78	Rouhier et al, 1999	CO2 enrichment	TB (total biomass)	Betula pendula	ECM	38.2677	4.252	15.5906	1.4173	3	3
79	Danyagri et al, 2014	CO2 enrichment	TB (total biomass)	Acer spicatum	AM	10.4545	4.3124	15.2273	1.43726	10	10
80	Bucher et al, 1998	CO2 enrichment	TB (total biomass)	Fraxinus excelsior	AM	6.52174	2.04969	6.70807	1.49069	12	12
81	Bazzaz et al, 1990	CO2 enrichment	TB (total biomass)	Pinus strobus	ECM	8.03702	1.87966	6.60565	1.50374	4	4
82	Bazzaz et al, 1990	CO2 enrichment	TB (total biomass)	Prunus sertina	AM	16.0655	1.6916	11.9086	1.5038	4	4
83	Catovsky et al, 1999	CO2 enrichment	TB (total biomass)	Betula alleghaniensis	ECM	7.10145	2.51022	9.27536	1.50613	3	3
84	Bassow et al, 1994	CO2 enrichment	TB (total biomass)	Betula alleghaniensis	ECM	5.78042	1.78704	5.45037	1.5121	3	3
85	Catovsky et al, 1999	CO2 enrichment	TB (total biomass)	Betula papyrifera	ECM	5.9854	1.01142	13.4307	1.51712	3	3
86	Vanhatalo et al, 2003	CO2 enrichment	TB (total biomass)	Picea abies	ECM	38.7	11.16	63.18	1.52	6	6
87	Atkin et al, 1999	CO2 enrichment	TB (total biomass)	Acacia dealbata	AM	3.82	0.55	8.55	1.54	8	8
88	Vanhatalo et al, 2003	CO2 enrichment	TB (total biomass)	Picea abies	ECM	36.7	5.47	32.42	1.57	6	6
89	Rochefort et al, 1992	CO2 enrichment	TB (total biomass)	Betula alleghaniensis	ECM	3.95233	1.17333	7.92906	1.67617	3	3
90	Bazzaz et al, 1990	CO2 enrichment	TB (total biomass)	Acer rubrum	AM	15.1404	3.9474	14.2729	1.6918	4	4
91	Bazzaz et al, 1993	CO2 enrichment	TB (total biomass)	Betula populifolia Marsh.	ECM	35.15	1.7143	41.1584	1.7143	6	6
92	Catovsky et al, 1999	CO2 enrichment	TB (total biomass)	Betula alleghaniensis	ECM	11.3043	2.00817	16.9565	1.75715	3	3
93	Catovsky et al, 1999	CO2 enrichment	TB (total biomass)	Betula papyrifera	ECM	14.5985	1.51712	18.6861	1.76998	3	3
94	Cernusak et al, 2011	CO2 enrichment	TB (total biomass)	Swietenia macrophylla	AM	7.62332	0.89686	9.41704	1.79376	5	5
95	Winter et al, 1999	CO2 enrichment	TB (total biomass)	Calophyllum longifolium	ECM	4.81	0.76	6.6	1.8	4	4
96	Atkin et al, 1999	CO2 enrichment	TB (total biomass)	Acacia implexa	AM	7.16	0.47	13.6	1.87	8	8
97	Bazzaz et al, 1993	CO2 enrichment	TB (total biomass)	Betula alleghaniensis	ECM	34.0994	3.1429	37.2513	2	6	6
98	Kitao et al, 2016	CO2 enrichment	TB (total biomass)	Betula maximowicziana	ECM	10.2094	2.1765	9.18848	2.04039	3	3
99	Rochefort et al, 1992	CO2 enrichment	TB (total biomass)	Betula lenta	ECM	5.35512	3.51998	8.36412	2.17902	3	3
100	Qiao et al, 2008	CO2 enrichment	TB (total biomass)	Abies faxoniana	ECM	8.74	2.14774	10.23	2.18238	3	3
101	J et al, 1999	CO2 enrichment	TB (total biomass)	Fagus sylvatica	AM	56.5835	3.65047	62.4848	2.19035	3	3
102	Atkin et al, 1999	CO2 enrichment	TB (total biomass)	Acacia saligna	AM	10.34	1.52	17	2.22	8	8
103	Cernusak et al, 2011	CO2 enrichment	TB (total biomass)	Chrysophyllum cainito	AM	8.52018	1.34529	10.7623	2.2422	5	5
104	Kinney et al, 1997	CO2 enrichment	TB (total biomass)	Quercus rubra	ECM	3.0888	1.5132	7.41313	2.2698	6	6
105	Bassow et al, 1994	CO2 enrichment	TB (total biomass)	Acer pensylvanicum	AM	6.20663	1.09098	4.22609	2.31835	3	3
106	Bassow et al, 1994	CO2 enrichment	TB (total biomass)	Betula populifolia	ECM	6.89173	1.51201	5.05385	2.33674	3	3
107	Bazzaz et al, 1990	CO2 enrichment	TB (total biomass)	Tsuga canadensis	ECM	18.6866	2.8196	14.5298	2.4434	4	4
108	Vanhatalo et al, 2003	CO2 enrichment	TB (total biomass)	Picea abies	ECM	38.01	0.2	34.79	2.56	6	6
109	Atkin et al, 1999	CO2 enrichment	TB (total biomass)	Acacia mearnsii	AM	7.68	1.5	11.98	2.63	8	8
110	Godbold et al, 1997	CO2 enrichment	TB (total biomass)	Tsuga canadensis	ECM	4.8	0.894427	6.5	2.68328	5	5
111	Cernusak et al, 2011	CO2 enrichment	TB (total biomass)	Inga punctata	AM	11.6592	1.3453	13.9013	2.6906	5	5
112	Cernusak et al, 2011	CO2 enrichment	TB (total biomass)	Albizia adinocephala	AM	19.7309	1.7938	23.3184	2.6906	5	5
113	Kitao et al, 2016	CO2 enrichment	TB (total biomass)	Betula platyphylla	ECM	7.69634	0.544089	11.623	2.72053	3	3
114	Bucher et al, 1998	CO2 enrichment	TB (total biomass)	Fagus sylvatica	AM	6.89441	3.35399	5.7764	2.79503	10	10
115	J et al, 1999	CO2 enrichment	TB (total biomass)	Ilex aquifolium	AM	35.0861	2.19018	39.7228	2.92041	3	3
116	J et al, 1999	CO2 enrichment	TB (total biomass)	Fraxinus excelsior	AM	69.6506	1.46029	74.2873	2.92041	3	3
117	J et al, 1999	CO2 enrichment	TB (total biomass)	Acer pseudoplatanus	AM	81.0316	2.19035	86.9329	2.92041	3	3
118	Kinney et al, 1997	CO2 enrichment	TB (total biomass)	Populus tremuloides	AM	8.64865	0.756598	11.7375	3.02634	6	6
119	Davis et al, 2002	CO2 enrichment	TB (total biomass)	Pinus palustris	ECM	30.3297	0.761236	65.0549	3.04546	3	3
120	Coley et al, 2002	CO2 enrichment	TB (total biomass)	Ficus insipida	AM	8.9	3.2909	9	3.11769	3	3
121	Lovelock et al, 1998	CO2 enrichment	TB (total biomass)	Tetragastris panamensis	AM	77	10.3923	90	3.11769	3	3
122	Cernusak et al, 2011	CO2 enrichment	TB (total biomass)	Schizolobium parahyba	AM	58.7444	3.139	54.2601	3.139	5	5
123	Bazzaz et al, 1993	CO2 enrichment	TB (total biomass)	Acer pensylvanicum	AM	26.4085	3.4286	36.7026	3.1429	6	6
124	Bazzaz et al, 1993	CO2 enrichment	TB (total biomass)	Acer rubrum	AM	33.7676	2	44.9188	3.1429	6	6
125	Bucher et al, 1998	CO2 enrichment	TB (total biomass)	Quercus robur	ECM	8.19876	2.04964	8.9441	3.5404	12	12
126	Cernusak et al, 2011	CO2 enrichment	TB (total biomass)	Hieronyma alchorneoides	AM	36.3229	3.5874	46.6368	3.5874	5	5
127	Vanhatalo et al, 2003	CO2 enrichment	TB (total biomass)	Picea abies	ECM	57.57	11.7	57.3	3.59	6	6
128	Rochefort et al, 1992	CO2 enrichment	TB (total biomass)	Betula populifolia	ECM	5.03997	2.01141	12.5001	3.68771	3	3
129	Kruger et al, 1998	CO2 enrichment	TB (total biomass)	Acer saccharum	AM	21.5273	2.96464	23.5188	3.70587	10	10
130	Lewis et al, 2013	CO2 enrichment	TB (total biomass)	Eucalyptus sideroxylon	ECM	12.5	2.68328	18.6	3.80132	5	5
131	Thomas et al, 2000	CO2 enrichment	TB (total biomass)	Gliricidia sepium	AM	29	2.702	44.86	3.82783	3	3
132	Qiao et al, 2008	CO2 enrichment	TB (total biomass)	Abies faxoniana	ECM	15.6	2.42487	18.89	3.94908	3	3
133	Bazzaz et al, 1993	CO2 enrichment	TB (total biomass)	Quercus rubra	ECM	18.6475	2	23.2279	4	6	6
134	Lewis et al, 2013	CO2 enrichment	TB (total biomass)	Eucalyptus saligna	ECM	25.8	7.60263	34.8	4.24853	5	5
135	J et al, 1999	CO2 enrichment	TB (total biomass)	Prunus laurocerasus	AM	35.9291	1.46029	41.4089	4.38053	3	3
136	J et al, 1999	CO2 enrichment	TB (total biomass)	Taxus baccata	AM	5.15823	2.92036	8.53038	4.38056	3	3
137	Godbold et al, 1997	CO2 enrichment	TB (total biomass)	Betula papyrifera	ECM	34.8	8.72067	38.8	4.47214	5	5
138	Liu et al, 2016	CO2 enrichment	TB (total biomass)	Pinus tabulaeformis	ECM	45.2318	3.5874	66.1854	4.4843	3	3
139	Berntson et al, 1997	CO2 enrichment	TB (total biomass)	Betula papyrifera	ECM	11.3	3.2	11	4.6	4	4
140	Lovelock et al, 1998	CO2 enrichment	TB (total biomass)	Virola surinamensis	AM	12.6	3.11769	13.3	4.67654	3	3
141	Lewis et al, 2013	CO2 enrichment	TB (total biomass)	Eucalyptus saligna	ECM	25.8	7.60263	46.3	4.69574	5	5
142	Bazzaz et al, 1993	CO2 enrichment	TB (total biomass)	Betula populifolia Marsh.	ECM	35.15	1.7143	166.788	4.831	6	6
143	Lewis et al, 2013	CO2 enrichment	TB (total biomass)	Eucalyptus sideroxylon	ECM	12.5	2.68328	34.9	4.91935	5	5
144	Kim et al, 2020	CO2 enrichment	TB (total biomass)	Pinus densiflra	ECM	39.42	4.1396	28.56	5.05759	3	3
145	Schortemeyer et al, 2002	CO2 enrichment	TB (total biomass)	Acacia dealbata	AM	7.4	4	8.3	5.2	4	4
146	Uselman et al, 2000	CO2 enrichment	TB (total biomass)	Robinia pseudoacacia	ECM	7.38789	3.44128	10.7725	5.27663	3	3
147	Cernusak et al, 2011	CO2 enrichment	TB (total biomass)	Coccoloba uvifera	AM	26.9058	2.6906	34.5291	5.3812	5	5
148	Schortemeyer et al, 2002	CO2 enrichment	TB (total biomass)	Acacia melanoxylon	AM	5.8	2.2	18.3	5.4	4	4
149	Schortemeyer et al, 2002	CO2 enrichment	TB (total biomass)	Acacia mearnsii	AM	4.2	2.8	8.8	5.6	4	4
150	Watanabe et al, 2011	CO2 enrichment	TB (total biomass)	Larix gmelinii	ECM	55.2	15.7	79.5	5.9	3	3
151	Vanhatalo et al, 2003	CO2 enrichment	TB (total biomass)	Pinus sylvestris	ECM	60.51	5.26	45.23	6.16	6	6
152	Eller et al, 2011	CO2 enrichment	TB (total biomass)	Acer saccharum	AM	43.8323	5.60059	40.9581	6.22291	3	3
153	Wait et al, 1999	CO2 enrichment	TB (total biomass)	Populus deltoides	ECM	29.6	5.54256	33.6	6.23538	3	3
154	Schortemeyer et al, 2002	CO2 enrichment	TB (total biomass)	Acacia implexa	AM	11.3	4.2	24.5	6.4	4	4
155	Kim et al, 2020	CO2 enrichment	TB (total biomass)	Quercus variabilis	ECM	11.23	5.9929	14.18	6.65108	3	3
156	Cernusak et al, 2011	CO2 enrichment	TB (total biomass)	Pachira quinata	AM	74.4395	4.4843	90.583	6.7264	5	5
157	Hou et al, 2011	CO2 enrichment	TB (total biomass)	Abies faxoniana	ECM	35.89	3.79671	33.33	7.15251	6	6
158	Cernusak et al, 2011	CO2 enrichment	TB (total biomass)	Ormosia macrocalyx	AM	16.5919	2.6906	38.565	7.1749	5	5
159	Bazzaz et al, 1993	CO2 enrichment	TB (total biomass)	Quercus rubra	ECM	18.6475	2	44.7618	7.2464	6	6
160	Wantanabe et al, 2008	CO2 enrichment	TB (total biomass)	Quercus mongolica	ECM	36.9	4.75201	37.27	7.25049	6	6
161	Vose et al, 1995	CO2 enrichment	TB (total biomass)	Pinus ponderosa	ECM	78.9	23.9023	75.7	7.27461	3	3
162	Calfapietra et al, 2003	CO2 enrichment	TB (total biomass)	Populus nigra	AM	62.02	7.91547	72.03	7.6037	3	3
163	Calfapietra et al, 2003	CO2 enrichment	TB (total biomass)	Populus euramericana	ECM	46.03	7.63834	58.5	8.45241	3	3
164	Broadmeadow et al, 2000	CO2 enrichment	TB (total biomass)	Fraxinus excelsior	AM	288.181	20.886	262.198	9.494	4	4
165	Bazzaz et al, 1993	CO2 enrichment	TB (total biomass)	Betula alleghaniensis	ECM	34.0994	3.1429	163.513	9.662	6	6
166	Volin et al, 2002	CO2 enrichment	TB (total biomass)	Populus tremuloides	AM	64.8035	8.54161	73.1461	9.68061	3	3
167	Vogel et al, 1997	CO2 enrichment	TB (total biomass)	Alnus glutinosa	ECM	71.7	4.69574	110.7	9.79398	5	5
168	Lovelock et al, 1998	CO2 enrichment	TB (total biomass)	Cordia alliodora	AM	59.6	16.9741	50.4	9.87269	3	3
169	Calfapietra et al, 2003	CO2 enrichment	TB (total biomass)	Populus alba	ECM	47.9	11.1024	61.84	10.0113	3	3
170	Major et al, 2015	CO2 enrichment	TB (total biomass)	Picea mariana	ECM	43.1	10.0459	50.1	10.0459	3	3
171	Major et al, 2015	CO2 enrichment	TB (total biomass)	Picea rubens	ECM	99.7	10.2191	106	10.0459	3	3
172	Major et al, 2015	CO2 enrichment	TB (total biomass)	Picea rubens	ECM	82.7	10.0459	101.5	10.2191	3	3
173	Major et al, 2015	CO2 enrichment	TB (total biomass)	Picea mariana	ECM	32.2	10.3923	37.1	10.3923	3	3
174	Polle et al, 2001	CO2 enrichment	TB (total biomass)	Quercus ilex	ECM	15.7	2.3	52.7	10.4	6	6
175	Major et al, 2015	CO2 enrichment	TB (total biomass)	Picea rubens	ECM	92.8	10.0459	97.5	10.5655	3	3
176	Godbold et al, 1997	CO2 enrichment	TB (total biomass)	Pinus strobus	ECM	10.3	1.78885	13.5	10.7331	5	5
177	Major et al, 2015	CO2 enrichment	TB (total biomass)	Picea mariana	ECM	41.3	10.2191	50.5	11.0851	3	3
178	Eller et al, 2011	CO2 enrichment	TB (total biomass)	Tsuga canadensis	ECM	33.0539	8.71204	54.6108	11.2012	3	3
179	Polle et al, 2001	CO2 enrichment	TB (total biomass)	Quercus ilex	ECM	16.3	2.8	42.1	12.1	6	6
180	Lovelock et al, 1998	CO2 enrichment	TB (total biomass)	Anacardium excelsum	AM	105	27.7128	117	12.1244	3	3
181	Baumeraerts et al, 2013	CO2 enrichment	TB (total biomass)	Quercus rubra	ECM	60.218	11.7987	79.564	12.7427	3	3
182	Duanb et al, 2015	CO2 enrichment	TB (total biomass)	Pinus radiata	ECM	45.4545	6.8461	49.8024	13.0075	3	3
183	Elkohen et al, 1992	CO2 enrichment	TB (total biomass)	Castanea sativa	ECM	61.0685	14.8759	72.6548	13.774	6	6
184	Kruger et al, 1998	CO2 enrichment	TB (total biomass)	Populus tremuloides	AM	54.5735	4.44711	60.7838	14.0819	10	10
185	Cernusak et al, 2011	CO2 enrichment	TB (total biomass)	Dalbergia retusa	AM	49.3274	13.4529	48.4305	14.7982	5	5
186	Wantanabe et al, 2008	CO2 enrichment	TB (total biomass)	Alnus hirsuta	ECM	67.89	14.256	77.12	14.9419	6	6
187	Duanb et al, 2015	CO2 enrichment	TB (total biomass)	Callitris rhomboidea	AM	52.9644	6.16142	64.0316	15.0614	3	3
188	Broadmeadow et al, 2000	CO2 enrichment	TB (total biomass)	Pinus sylvestris	ECM	85.7837	5.7065	141.776	15.489	4	4
189	Duan et al, 2018	CO2 enrichment	TB (total biomass)	Pinus radiata	ECM	43.52	5.404	48.01	16.5411	3	3
190	Bazzaz et al, 1993	CO2 enrichment	TB (total biomass)	Fraxinus americana	AM	25.1728	1.7143	118.863	16.908	6	6
191	Tschaplinski et al, 1995	CO2 enrichment	TB (total biomass)	Platanus occidentalis	AM	149.471	20.7038	211.64	17.7477	5	5
192	Coley et al, 2002	CO2 enrichment	TB (total biomass)	Ficus insipida	AM	159	10.3923	193	18.1865	3	3
193	Duan et al, 2018	CO2 enrichment	TB (total biomass)	Callitris rhomboidea	AM	51.24	9.76877	62.43	18.7061	3	3
194	Duan et al, 2015	CO2 enrichment	TB (total biomass)	Abies faxoniana	ECM	569.128	32.214	558.389	21.478	4	4
195	Bazzaz et al, 1993	CO2 enrichment	TB (total biomass)	Acer pensylvanicum	AM	26.4085	3.4286	108.352	21.739	6	6
196	Bucher et al, 1998	CO2 enrichment	TB (total biomass)	Alnus incana	ECM	77.1429	23.4781	110.683	22.36	12	12
197	Bazzaz et al, 1993	CO2 enrichment	TB (total biomass)	Acer rubrum	AM	33.7676	2	223.122	24.154	6	6
198	Wang et al, 2001	CO2 enrichment	TB (total biomass)	Populus tremuloides	AM	58.6	6.02	97	25	4	4
199	Elkohen et al, 1992	CO2 enrichment	TB (total biomass)	Castanea sativa	ECM	61.0685	14.8759	144.321	25.3441	6	6
200	Vanhatalo et al, 2003	CO2 enrichment	TB (total biomass)	Pinus sylvestris	ECM	87.24	7.41	91.45	25.87	6	6
201	Parsons et al, 2003	CO2 enrichment	TB (total biomass)	Betula papyrifera	ECM	101.8	29.6985	157.8	27.1529	8	8
202	Kurepin et al, 2018	CO2 enrichment	TB (total biomass)	Picea abies	ECM	47.0588	21.7021	56.8627	27.9027	10	10
203	Kurepin et al, 2018	CO2 enrichment	TB (total biomass)	Pinus sylvestris	ECM	83.3333	49.6044	70.5882	31.003	10	10
204	Tschaplinski et al, 1995	CO2 enrichment	TB (total biomass)	Liquidambar styraciflua	AM	35.6383	15.4622	57.4468	32.1137	5	5
205	Duan et al, 2009	CO2 enrichment	TB (total biomass)	Syzygium hancei	AM	199.686	84.905	246.855	34.592	3	3
206	Wang et al, 2001	CO2 enrichment	TB (total biomass)	Populus tremuloides	AM	86.5	16.66	105.3	36.8	4	4
207	Tschaplinski et al, 1995	CO2 enrichment	TB (total biomass)	Acer saccharum	AM	15.873	3.54931	74.0741	37.8593	5	5
208	Parsons et al, 2003	CO2 enrichment	TB (total biomass)	Acer saccharum	AM	145.3	12.7279	188.9	39.0323	8	8
209	Spinnler et al, 2003	CO2 enrichment	TB (total biomass)	Picea abies	ECM	391.026	114.67	455.128	43.0018	5	5
210	Vose et al, 1995	CO2 enrichment	TB (total biomass)	Pinus ponderosa	ECM	78.9	23.9023	113.6	46.7654	3	3
211	Lovelock et al, 1998	CO2 enrichment	TB (total biomass)	Ficus insipida	AM	260	72.7461	240	46.7654	3	3
212	Broadmeadow et al, 2000	CO2 enrichment	TB (total biomass)	Quercus petraea	ECM	303.846	11.539	315.385	57.692	4	4
213	Mousseau et al, 1989	CO2 enrichment	TB (total biomass)	Castanea sativa	ECM	90.4	36	129	59	3	3
214	Spinnler et al, 2003	CO2 enrichment	TB (total biomass)	Fagus sylvatica	AM	408.046	141.36	281.609	64.2556	5	5
215	Friend et al, 2000	CO2 enrichment	TB (total biomass)	Liquidambar styraciflua	AM	2065.68	113.52	2884.24	64.86	4	4
216	Duan et al, 2009	CO2 enrichment	TB (total biomass)	Schima superba	AM	666.667	276.729	842.767	69.183	3	3
217	Spinnler et al, 2003	CO2 enrichment	TB (total biomass)	Picea abies	ECM	826.923	157.672	1179.49	71.666	5	5
218	Spinnler et al, 2003	CO2 enrichment	TB (total biomass)	Fagus sylvatica	AM	287.356	77.1063	264.368	77.1063	5	5
219	Spinnler et al, 2003	CO2 enrichment	TB (total biomass)	Fagus sylvatica	AM	287.356	77.1063	454.023	77.1063	5	5
220	Spinnler et al, 2003	CO2 enrichment	TB (total biomass)	Fagus sylvatica	AM	298.851	115.658	379.31	77.1063	5	5
221	Spinnler et al, 2003	CO2 enrichment	TB (total biomass)	Fagus sylvatica	AM	396.552	115.658	287.356	77.1063	5	5
222	Kitao et al, 2015	CO2 enrichment	TB (total biomass)	Quercus serrata	ECM	320	116.047	367	83.1384	3	3
223	Spinnler et al, 2003	CO2 enrichment	TB (total biomass)	Picea abies	ECM	891.026	157.67	1006.41	85.9992	5	5
224	Kitao et al, 2015	CO2 enrichment	TB (total biomass)	Quercus mongolica	ECM	283	10.3923	283	88.3346	3	3
225	Spinnler et al, 2003	CO2 enrichment	TB (total biomass)	Fagus sylvatica	AM	298.851	115.658	224.138	89.957	5	5
226	Duan et al, 2009	CO2 enrichment	TB (total biomass)	Acmena acuminatissima	AM	167.398	39.499	270.846	92.163	3	3
227	Vanhatalo et al, 2003	CO2 enrichment	TB (total biomass)	Betula pubescens	ECM	284.1	50	588.4	102.3	6	6
228	Vanhatalo et al, 2003	CO2 enrichment	TB (total biomass)	Betula pubescens	ECM	1548.5	167.5	1266.1	110.9	6	6
229	Hiraoka et al, 2017	CO2 enrichment	TB (total biomass)	Cryptomeria japonica	AM	251.087	65.217	414.13	114.131	3	3
230	Spinnler et al, 2003	CO2 enrichment	TB (total biomass)	Fagus sylvatica	AM	396.552	115.658	574.713	115.658	5	5
231	M et al, 2017	CO2 enrichment	TB (total biomass)	Shorea platycarpa	ECM	179.22	78.5313	122.96	116.46	18	18
232	Lovelock et al, 1998	CO2 enrichment	TB (total biomass)	Cecropia longipes	ECM	443	103.923	401	133.368	3	3
233	Spinnler et al, 2003	CO2 enrichment	TB (total biomass)	Fagus sylvatica	AM	408.046	141.36	620.69	141.36	5	5
234	Spinnler et al, 2003	CO2 enrichment	TB (total biomass)	Picea abies	ECM	641.026	157.67	711.538	143.339	5	5
235	Lovelock et al, 1998	CO2 enrichment	TB (total biomass)	Luehea seemannii	AM	273	72.7461	333	150.688	3	3
236	Spinnler et al, 2003	CO2 enrichment	TB (total biomass)	Picea abies	ECM	339.744	114.67	455.128	157.672	5	5
237	Spinnler et al, 2003	CO2 enrichment	TB (total biomass)	Picea abies	ECM	391.026	114.67	519.231	157.672	5	5
238	Spinnler et al, 2003	CO2 enrichment	TB (total biomass)	Picea abies	ECM	455.128	229.34	557.692	172.005	5	5
239	Sun et al, 2018	CO2 enrichment	TB (total biomass)	Quercus mongolica	ECM	2303.3	183.424	2910.3	177.882	3	3
240	Friend et al, 2000	CO2 enrichment	TB (total biomass)	Liquidambar styraciflua	AM	2880.56	275.66	3804.53	194.56	4	4
241	Friend et al, 2000	CO2 enrichment	TB (total biomass)	Pinus taeda	ECM	3319.38	210.82	4073.11	194.58	4	4
242	Spinnler et al, 2003	CO2 enrichment	TB (total biomass)	Picea abies	ECM	455.128	229.34	532.051	200.674	5	5
243	Spinnler et al, 2003	CO2 enrichment	TB (total biomass)	Picea abies	ECM	826.923	157.672	1064.1	200.687	5	5
244	Spinnler et al, 2003	CO2 enrichment	TB (total biomass)	Picea abies	ECM	410.256	114.67	705.128	215.007	5	5
245	Berntson et al, 1997	CO2 enrichment	TB (total biomass)	Betula alleghaniensis	ECM	224	146	593	226	4	4
246	Spinnler et al, 2003	CO2 enrichment	TB (total biomass)	Picea abies	ECM	685.897	243.676	653.846	229.34	5	5
247	Spinnler et al, 2003	CO2 enrichment	TB (total biomass)	Picea abies	ECM	339.744	114.67	461.538	229.342	5	5
248	Spinnler et al, 2003	CO2 enrichment	TB (total biomass)	Picea abies	ECM	685.897	243.676	679.487	243.676	5	5
249	Spinnler et al, 2003	CO2 enrichment	TB (total biomass)	Picea abies	ECM	641.026	157.67	865.385	301.008	5	5
250	Friend et al, 2000	CO2 enrichment	TB (total biomass)	Pinus taeda	ECM	2091.04	64.86	2617.7	324.36	4	4
251	Spinnler et al, 2003	CO2 enrichment	TB (total biomass)	Picea abies	ECM	410.256	114.67	679.487	329.677	5	5
252	Duan et al, 2009	CO2 enrichment	TB (total biomass)	Ormosia pinnata	AM	817.61	149.371	1100.63	353.77	3	3
253	Spinnler et al, 2003	CO2 enrichment	TB (total biomass)	Picea abies	ECM	891.026	157.67	1057.69	401.352	5	5
254	Janssens et al, 2005	CO2 enrichment	TB (total biomass)	Pinus sylvestris	ECM	789	194	1132	422	4	4
255	Duan et al, 2009	CO2 enrichment	TB (total biomass)	Castanopsis hystrix	ECM	1242.14	314.46	1580.19	558.17	3	3
256	Temperton al, 2003	CO2 enrichment	TB (total biomass)	Picea abies	ECM	1417.81	675.404	1165.07	882.174	5	5
257	Dawes et al, 2015	CO2 enrichment	TB (total biomass)	Pinus uncinate	ECM	5200	894.427	4400	1729.22	5	5
258	Dawes et al, 2015	CO2 enrichment	TB (total biomass)	Larix decidua	ECM	6853.33	1311.83	6320	2206.26	5	5
259	Liu et al, 2004	CO2 enrichment	AGB (aboveground biomass)	Fagus sylvatica	AM	1.97	0.02	1.93	0.02	6	6
260	Liu et al, 2004	CO2 enrichment	AGB (aboveground biomass)	Picea abies	ECM	2.04	0.02	2.03	0.02	6	6
261	Yan et al, 2014	CO2 enrichment	AGB (aboveground biomass)	Syzygium hancei	AM	0.0927835	0.0618555	0.0721649	0.0309279	3	3
262	Yan et al, 2014	CO2 enrichment	AGB (aboveground biomass)	Schima superba	AM	0.113402	0.030927	0.195876	0.061857	3	3
263	Yan et al, 2014	CO2 enrichment	AGB (aboveground biomass)	Acmena acuminatissima	AM	0.793814	0.123714	0.793814	0.061857	3	3
264	Yan et al, 2014	CO2 enrichment	AGB (aboveground biomass)	Ormosia pinnata	AM	0.608247	0.092784	0.649485	0.185565	3	3
265	Yan et al, 2014	CO2 enrichment	AGB (aboveground biomass)	Castanopsis hystrix	ECM	0.525773	0.185568	0.701031	0.247422	3	3
266	Ambebe et al, 2013	CO2 enrichment	AGB (aboveground biomass)	Betula papyrifera	ECM	2.45902	0.86065	3.81148	0.36885	3	3
267	Lia et al, 2018	CO2 enrichment	AGB (aboveground biomass)	Acer saccharum	AM	2.61506	0.10461	5.64854	0.41841	3	3
268	Egli et al, 1998	CO2 enrichment	AGB (aboveground biomass)	Picea abies	ECM	4.74	0.26	5.51	0.45	4	4
269	Bucher et al, 1998	CO2 enrichment	AGB (aboveground biomass)	Fraxinus excelsior	AM	2.3	0.8	2.3	0.6	12	12
270	Ambebe et al, 2013	CO2 enrichment	AGB (aboveground biomass)	Betula papyrifera	ECM	2.45902	0.86065	4.05738	0.61475	3	3
271	Ambebe et al, 2013	CO2 enrichment	AGB (aboveground biomass)	Betula papyrifera	ECM	2.45902	0.86065	5.28689	0.7377	3	3
272	Veteli et al, 2002	CO2 enrichment	AGB (aboveground biomass)	Salix myrsinifolia	ECM	11.0895	0.9728	12.4514	0.8754	4	4
273	Bucher et al, 1998	CO2 enrichment	AGB (aboveground biomass)	Fagus sylvatica	AM	2.8	1.1	2.6	1.1	10	10
274	Lia et al, 2018	CO2 enrichment	AGB (aboveground biomass)	Acer saccharum	AM	2.61506	0.10461	8.99582	1.25518	3	3
275	Veteli et al, 2002	CO2 enrichment	AGB (aboveground biomass)	Salix myrsinifolia	ECM	11.0895	0.9728	10.7004	1.2646	4	4
276	Bucher et al, 1998	CO2 enrichment	AGB (aboveground biomass)	Quercus robur	ECM	2.8	0.8	2.9	1.3	12	12
277	Rouhier et al, 1999	CO2 enrichment	AGB (aboveground biomass)	Betula pendula	ECM	28.5827	4.0157	22.6772	1.6535	3	3
278	Bachofen et al, 2019	CO2 enrichment	AGB (aboveground biomass)	Pinus sylvestris	ECM	5.79151	1.73745	6.31274	1.73745	5	5
279	Bachofen et al, 2019	CO2 enrichment	AGB (aboveground biomass)	Pinus sylvestris	ECM	7.12355	2.02705	6.83398	2.027	5	5
280	Rasineni et al, 2011	CO2 enrichment	AGB (aboveground biomass)	Gmelina arborea	AM	6.47368	1.26316	11.2105	2.2108	4	4
281	Bachofen et al, 2019	CO2 enrichment	AGB (aboveground biomass)	Pinus nigra	ECM	8.10811	2.3166	8.51351	2.3166	5	5
282	Bachofen et al, 2019	CO2 enrichment	AGB (aboveground biomass)	Pinus sylvestris	ECM	10.5405	4.6332	8.861	2.3166	4	4
283	Bachofen et al, 2019	CO2 enrichment	AGB (aboveground biomass)	Pinus nigra	ECM	9.38224	2.77984	9.26641	2.54824	4	4
284	Bachofen et al, 2019	CO2 enrichment	AGB (aboveground biomass)	Pinus sylvestris	ECM	7.23938	2.6062	6.77606	2.6062	5	5
285	Bachofen et al, 2019	CO2 enrichment	AGB (aboveground biomass)	Pinus nigra	ECM	10.1351	2.78	9.15058	2.77992	4	4
286	Bachofen et al, 2019	CO2 enrichment	AGB (aboveground biomass)	Pinus nigra	ECM	10.5985	2.548	11.2934	3.0116	4	4
287	Major et al, 2019	CO2 enrichment	AGB (aboveground biomass)	Picea mariana	ECM	15.6962	4.0508	20.2532	4.0504	4	4
288	Major et al, 2019	CO2 enrichment	AGB (aboveground biomass)	Picea abies	ECM	17.7215	4.0508	29.3671	4.0504	4	4
289	Major et al, 2019	CO2 enrichment	AGB (aboveground biomass)	Picea rubens	ECM	5.56962	4.05064	7.59494	4.0506	4	4
290	Lewis et al, 2013	CO2 enrichment	AGB (aboveground biomass)	Eucalyptus saligna	ECM	18.4	13	22.2	4.5	5	5
291	Major et al, 2019	CO2 enrichment	AGB (aboveground biomass)	Picea glauca	ECM	12.6582	4.0508	14.6835	6.076	4	4
292	Lawson et al, 2017	CO2 enrichment	AGB (aboveground biomass)	Eucalyptus camaldulensis	ECM	22.93	5.31	22.63	6.13	8	8
293	Lewis et al, 2013	CO2 enrichment	AGB (aboveground biomass)	Eucalyptus sideroxylon	ECM	8.6	5.5	13.9	6.5	5	5
294	Loewe et al, 2000	CO2 enrichment	AGB (aboveground biomass)	Picea abies	ECM	27.9508	10.0984	16.9508	6.6722	3	3
295	Lewis et al, 2013	CO2 enrichment	AGB (aboveground biomass)	Eucalyptus saligna	ECM	18.4	13	30.2	8.5	5	5
296	Calfapietra et al, 2003	CO2 enrichment	AGB (aboveground biomass)	Populus nigra	AM	53.58	8.73	61.73	8.79	3	3
297	Lewis et al, 2013	CO2 enrichment	AGB (aboveground biomass)	Eucalyptus sideroxylon	ECM	8.6	5.5	17.8	9	5	5
298	Calfapietra et al, 2003	CO2 enrichment	AGB (aboveground biomass)	Populus euramericana	ECM	38.16	8.82	48.39	9.69	3	3
299	Loewe et al, 2000	CO2 enrichment	AGB (aboveground biomass)	Populus tremula	AM	45.7613	10.2058	44.7737	10.5349	3	3
300	Calfapietra et al, 2003	CO2 enrichment	AGB (aboveground biomass)	Populus alba	ECM	40.32	12.93	51.38	11.43	3	3
301	Vogel et al, 1997	CO2 enrichment	AGB (aboveground biomass)	Alnus glutinosa	ECM	34.3	7.75	51.6	14.6	5	5
302	Bucher et al, 1998	CO2 enrichment	AGB (aboveground biomass)	Alnus incana	ECM	53.5	16.6	75.8	14.8	12	12
303	Major et al, 2019	CO2 enrichment	AGB (aboveground biomass)	Pinus resinosa	ECM	38.6207	18.0564	54.1693	16.05	4	4
304	Major et al, 2019	CO2 enrichment	AGB (aboveground biomass)	Pinus rigida	ECM	93.2915	18.0564	147.962	18.056	4	4
305	Major et al, 2019	CO2 enrichment	AGB (aboveground biomass)	Pinus strobus	ECM	53.6677	18.0564	65.2038	18.0564	4	4
306	Major et al, 2019	CO2 enrichment	AGB (aboveground biomass)	Pinus banksiana	ECM	81.7555	18.0564	96.3009	18.0564	4	4
307	Lawson et al, 2017	CO2 enrichment	AGB (aboveground biomass)	Acacia floribunda	AM	8.9	33.36	10.93	29.36	8	8
308	Hoosbeek et al, 2011	CO2 enrichment	AGB (aboveground biomass)	Fagus sylvatica	AM	600	70	600	30	4	4
309	Lawson et al, 2017	CO2 enrichment	AGB (aboveground biomass)	Casuarina cunninghamiana	AM	10.44	30	17.19	45.28	8	8
310	Hiraoka et al, 2017	CO2 enrichment	AGB (aboveground biomass)	Cryptomeria japonica	AM	150	41.304	252.174	69.565	3	3
311	Smith et al, 2013	CO2 enrichment	AGB (aboveground biomass)	Alnus glutinosa	ECM	5209.04	542.37	6836.16	135.6	3	3
312	Huang et al, 2015	CO2 enrichment	AGB (aboveground biomass)	Syzygium hancei	AM	511.792	297.171	231.132	148.584	3	3
313	Walker et al, 1998	CO2 enrichment	AGB (aboveground biomass)	Pinus ponderosa	ECM	169.87	85.4	255.3	187.15	5	5
314	Huang et al, 2015	CO2 enrichment	AGB (aboveground biomass)	Acmena acuminatissima	AM	528.302	247.641	264.151	198.114	3	3
315	Smith et al, 2013	CO2 enrichment	AGB (aboveground biomass)	Fagus sylvatica	AM	811.236	323.595	887.64	256.182	3	3
316	Hoosbeek et al, 2011	CO2 enrichment	AGB (aboveground biomass)	Betula pendula	ECM	8750	500	10190	320	4	4
317	Walker et al, 1998	CO2 enrichment	AGB (aboveground biomass)	Pinus ponderosa	ECM	169.87	85.4	261.93	323.7	5	5
318	M et al, 2017	CO2 enrichment	AGB (aboveground biomass)	Shorea platycarpa	ECM	137.71	277.92	89.59	392.94	18	18
319	Berntson et al, 1997	CO2 enrichment	AGB (aboveground biomass)	Betula papyrifera	ECM	658	280	593	464	4	4
320	Huang et al, 2015	CO2 enrichment	AGB (aboveground biomass)	Schima superba	AM	1403.3	1238.22	957.547	594.339	3	3
321	Huang et al, 2015	CO2 enrichment	AGB (aboveground biomass)	Castanopsis hystrix	ECM	1040.09	445.77	1650.94	594.36	3	3
322	Hoosbeek et al, 2011	CO2 enrichment	AGB (aboveground biomass)	Alnus glutinosa	ECM	7140	360	8560	630	4	4
323	Smith et al, 2013	CO2 enrichment	AGB (aboveground biomass)	Betula pendula	ECM	7107.34	2033.91	7694.92	677.94	3	3
324	Huang et al, 2015	CO2 enrichment	AGB (aboveground biomass)	Ormosia pinnata	AM	974.057	247.629	1683.96	941.04	3	3
325	Watanabe et al, 2016	CO2 enrichment	AGB (aboveground biomass)	Larix kaempferi	ECM	751.9	1486.8	934.9	1499.1	3	3
326	Dawes et al, 2015	CO2 enrichment	AGB (aboveground biomass)	Pinus uncinate	ECM	2613.33	1066.7	2266.67	2000	5	5
327	Watanabe et al, 2016	CO2 enrichment	AGB (aboveground biomass)	Kalopanax septemlobus	AM	2981	7385.7	3521.9	2493.6	3	3
328	Watanabe et al, 2016	CO2 enrichment	AGB (aboveground biomass)	Betula platyphylla	ECM	2232.5	2541.3	4161.4	3014.4	3	3
329	Dawes et al, 2015	CO2 enrichment	AGB (aboveground biomass)	Larix decidua	ECM	3866.67	1733.3	3626.67	3066.65	5	5
330	Polle et al, 1999	CO2 enrichment	RB (root biomass)	Prosopis glandulosa	AM	0.194	0.0103923	0.248	0.0103923	3	3
331	Winter et al,2000	CO2 enrichment	RB (root biomass)	Virola surinamensis	AM	0.029	0.008	0.031	0.013	5	5
332	Polle et al, 1999	CO2 enrichment	RB (root biomass)	Prosopis glandulosa	AM	0.167	0.00519615	0.229	0.0138564	3	3
333	Bassow et al, 1994	CO2 enrichment	RB (root biomass)	Betula alleghaniensis	ECM	0.51	0.0242487	0.661	0.0311769	3	3
334	Bassow et al, 1994	CO2 enrichment	RB (root biomass)	Betula populifolia	ECM	0.733	0.034641	0.814	0.0381051	3	3
335	Olesniewicz et al, 1999	CO2 enrichment	RB (root biomass)	Robinia pseudoacacia	ECM	0.324	0.0952628	0.694	0.0502295	3	3
336	Janssens et al, 1998	CO2 enrichment	RB (root biomass)	Pinus sylvestris	ECM	0.141615	0.0347826	0.335404	0.0546584	3	3
337	Fondo et al, 2010	CO2 enrichment	RB (root biomass)	Betula papyrifera	ECM	2.51613	0.193548	2.77419	0.0645161	3	3
338	Hatenschwiler et al, 1997	CO2 enrichment	RB (root biomass)	Picea abies	ECM	1.47	0.069282	1.38	0.121244	3	3
339	Roden et al, 1997	CO2 enrichment	RB (root biomass)	Acmena smithii	AM	0.225	0.048	0.406	0.127	7	7
340	Hatenschwiler et al, 1997	CO2 enrichment	RB (root biomass)	Picea abies	ECM	1.47	0.069282	1.44	0.138564	3	3
341	Ambebe et al, 2009	CO2 enrichment	RB (root biomass)	Betula papyrifera	ECM	1.00787	0.15748	1.13386	0.15748	4	4
342	Warrier et al, 2013	CO2 enrichment	RB (root biomass)	Ailanthus excelsa	AM	0.21	0.23	0.22	0.16	5	5
343	Winter et al,2000	CO2 enrichment	RB (root biomass)	Ficus insipida	AM	0.769	0.121	0.983	0.162	5	5
344	Rasineni et al, 2011	CO2 enrichment	RB (root biomass)	Gmelina arborea	AM	0.950891	0.120438	1.6295	0.18068	4	4
345	Chen et al, 2021	CO2 enrichment	RB (root biomass)	Populus cathayana	AM	1.41333	0.195959	1.28	0.195959	6	6
346	Cortes et al, 2004	CO2 enrichment	RB (root biomass)	Quercus ilex	ECM	0.878568	0.137151	0.840942	0.215524	3	3
347	Warrier et al, 2013	CO2 enrichment	RB (root biomass)	Casuarina equisetifolia	AM	0.16	0.18	0.2	0.22	5	5
348	Cortes et al, 2004	CO2 enrichment	RB (root biomass)	Quercus ilex	ECM	0.878568	0.137151	1.38011	0.235109	3	3
349	Zhao et al, 2011	CO2 enrichment	RB (root biomass)	Populus cathayana	AM	2.59	0.737902	4.18	0.268328	5	5
350	Bachofen et al, 2019	CO2 enrichment	RB (root biomass)	Pinus sylvestris	ECM	2.01544	0.41441	2.40927	0.310791	5	5
351	Ambebe et al, 2013	CO2 enrichment	RB (root biomass)	Betula papyrifera	ECM	0.64	0.16	1.97333	0.32	3	3
352	Chen et al, 2021	CO2 enrichment	RB (root biomass)	Populus cathayana	AM	1.54667	0.130631	2.21333	0.326615	6	6
353	Zhao et al, 2011	CO2 enrichment	RB (root biomass)	Populus cathayana	AM	2.64	0.64846	3.34	0.33541	5	5
354	Rochefort et al, 1992	CO2 enrichment	RB (root biomass)	Betula papyrifera	ECM	0.655	0.34641	1.7	0.34641	3	3
355	Bassow et al, 1994	CO2 enrichment	RB (root biomass)	Acer pensylvanicum	AM	0.426	0.247683	0.559	0.356802	3	3
356	Cortes et al, 2004	CO2 enrichment	RB (root biomass)	Quercus cerrioides	ECM	1.10485	0.35268	1.97215	0.391859	3	3
357	Vanhatalo et al, 2003	CO2 enrichment	RB (root biomass)	Picea abies	ECM	6.54	2.04	6.42	0.41	6	6
358	Bachofen et al, 2019	CO2 enrichment	RB (root biomass)	Pinus sylvestris	ECM	2.61776	0.466198	2.27027	0.41441	5	5
359	Roden et al, 1997	CO2 enrichment	RB (root biomass)	Doryphora sassafras	AM	0.631	0.28	0.931	0.431	7	7
360	Cortes et al, 2004	CO2 enrichment	RB (root biomass)	Quercus cerrioides	ECM	1.10485	0.35268	1.04075	0.450628	3	3
361	Bachofen et al, 2019	CO2 enrichment	RB (root biomass)	Pinus sylvestris	ECM	3.52124	0.621605	2.71042	0.46622	5	5
362	Ambebe et al, 2013	CO2 enrichment	RB (root biomass)	Betula papyrifera	ECM	1.97333	0.53334	3.14667	0.48	3	3
363	Bachofen et al, 2019	CO2 enrichment	RB (root biomass)	Pinus nigra	ECM	3.5444	0.74132	3.45174	0.50964	4	4
364	Rochefort et al, 1992	CO2 enrichment	RB (root biomass)	Betula alleghaniensis	ECM	0.871	0.173205	1.81	0.519615	3	3
365	Rochefort et al, 1992	CO2 enrichment	RB (root biomass)	Betula lenta	ECM	0.874	0.69282	1.717	0.519615	3	3
366	Ambebe et al, 2013	CO2 enrichment	RB (root biomass)	Betula papyrifera	ECM	1.17333	0.26667	2.18667	0.53333	3	3
367	Bachofen et al, 2019	CO2 enrichment	RB (root biomass)	Pinus nigra	ECM	3.52124	1.0193	3.26641	0.60232	4	4
368	Atwell et al, 2009	CO2 enrichment	RB (root biomass)	Eucalyptus pauciflora	ECM	1.54	0.363731	2.04	0.6755	3	3
369	Vanhatalo et al, 2003	CO2 enrichment	RB (root biomass)	Picea abies	ECM	6.24	0.98	5.57	0.8	6	6
370	Lia et al, 2018	CO2 enrichment	RB (root biomass)	Acer saccharum	AM	3.34728	0.20921	8.57741	0.83682	3	3
371	Vanhatalo et al, 2003	CO2 enrichment	RB (root biomass)	Picea abies	ECM	5.92	1.2	11.3	0.93	6	6
372	Bucher et al, 1998	CO2 enrichment	RB (root biomass)	Fraxinus excelsior	AM	4.1	1.4	4.4	1	12	12
373	Rochefort et al, 1992	CO2 enrichment	RB (root biomass)	Betula populifolia	ECM	0.958	0.519615	2.922	1.03923	3	3
374	Lewis et al, 2013	CO2 enrichment	RB (root biomass)	Eucalyptus sideroxylon	ECM	3.9	0.447214	5.5	1.11803	5	5
375	Bachofen et al, 2019	CO2 enrichment	RB (root biomass)	Pinus sylvestris	ECM	4.49421	0.880608	4.19305	1.13961	5	5
376	Vanhatalo et al, 2003	CO2 enrichment	RB (root biomass)	Picea abies	ECM	12.14	3.26	8.88	1.16	6	6
377	Lewis et al, 2013	CO2 enrichment	RB (root biomass)	Eucalyptus sideroxylon	ECM	2.5	0.67082	3.9	1.34164	5	5
378	Godbold et al, 1997	CO2 enrichment	RB (root biomass)	Pinus strobus	ECM	3.9	0.447214	9.4	1.34164	5	5
379	Rouhier et al, 1999	CO2 enrichment	RB (root biomass)	Betula pendula	ECM	38.0916	6.215	33.1413	1.6733	3	3
380	Kim et al, 2020	CO2 enrichment	RB (root biomass)	Pinus densiflra	ECM	13.0645	1.67628	10.1613	1.67611	3	3
381	Bucher et al, 1998	CO2 enrichment	RB (root biomass)	Fagus sylvatica	AM	4.2	2.3	3.4	1.7	10	10
382	Godbold et al, 1997	CO2 enrichment	RB (root biomass)	Tsuga canadensis	ECM	2.9	0.67082	4.3	1.78885	5	5
383	Lia et al, 2018	CO2 enrichment	RB (root biomass)	Acer saccharum	AM	3.34728	0.20921	10.4603	1.8828	3	3
384	Vanhatalo et al, 2003	CO2 enrichment	RB (root biomass)	Pinus sylvestris	ECM	10.8	1.83	9.28	1.95	6	6
385	Warrier et al, 2013	CO2 enrichment	RB (root biomass)	Tectona grandis	AM	1.61	1.68	1.96	2	5	5
386	Major et al, 2019	CO2 enrichment	RB (root biomass)	Picea abies	ECM	14.1772	2.0254	15.1899	2.0252	4	4
387	Major et al, 2019	CO2 enrichment	RB (root biomass)	Picea rubens	ECM	6.58228	2.02532	7.08861	2.02532	4	4
388	Major et al, 2019	CO2 enrichment	RB (root biomass)	Picea mariana	ECM	12.1519	2.0254	12.6582	2.0254	4	4
389	Major et al, 2019	CO2 enrichment	RB (root biomass)	Picea glauca	ECM	12.6582	2.0254	16.2025	2.0254	4	4
390	Major et al, 2015	CO2 enrichment	RB (root biomass)	Picea mariana	ECM	7.1	2.07846	8.2	2.07846	3	3
391	Major et al, 2015	CO2 enrichment	RB (root biomass)	Picea rubens	ECM	9.2	2.07846	10.1	2.07846	3	3
392	Major et al, 2015	CO2 enrichment	RB (root biomass)	Picea rubens	ECM	16.1	2.07846	19.6	2.07846	3	3
393	Major et al, 2015	CO2 enrichment	RB (root biomass)	Picea mariana	ECM	17.4	2.07846	20.9	2.07846	3	3
394	Major et al, 2015	CO2 enrichment	RB (root biomass)	Picea rubens	ECM	4.26	1.24708	6.73	2.25167	3	3
395	Major et al, 2015	CO2 enrichment	RB (root biomass)	Picea mariana	ECM	9	2.07846	9.7	2.25167	3	3
396	Atwell et al, 2009	CO2 enrichment	RB (root biomass)	Eucalyptus pauciflora	ECM	19.4	2.07846	21.1	2.25167	3	3
397	Bucher et al, 1998	CO2 enrichment	RB (root biomass)	Quercus robur	ECM	5.5	1.5	6.2	2.4	12	12
398	Lewis et al, 2013	CO2 enrichment	RB (root biomass)	Eucalyptus saligna	ECM	7.4	2.45967	12.6	2.45967	5	5
399	Liberloo et al, 2006	CO2 enrichment	RB (root biomass)	Populus nigra	AM	9.56098	1.25468	10.6707	2.50926	6	6
400	Godbold et al, 1997	CO2 enrichment	RB (root biomass)	Betula papyrifera	ECM	16.5	3.1305	19.6	2.68328	5	5
401	Loewe et al, 2000	CO2 enrichment	RB (root biomass)	Populus tremula	AM	42.5806	11.6129	22.4516	2.8387	3	3
402	Thomas et al, 2000	CO2 enrichment	RB (root biomass)	Gliricidia sepium	AM	14.25	1.4376	24.74	2.84056	3	3
403	Lewis et al, 2013	CO2 enrichment	RB (root biomass)	Eucalyptus saligna	ECM	7.4	2.45967	16.1	2.90689	5	5
404	Uselman et al, 2000	CO2 enrichment	RB (root biomass)	Robinia pseudoacacia	ECM	3.65	1.21244	6.04	2.92717	3	3
405	Wait et al, 1999	CO2 enrichment	RB (root biomass)	Populus deltoides	ECM	9.5	2.59808	12	2.94449	3	3
406	Watanabe et al, 2011	CO2 enrichment	RB (root biomass)	Larix gmelinii	ECM	25.9	8.9	35.3	3.1	3	3
407	Liberloo et al, 2006	CO2 enrichment	RB (root biomass)	Populus alba	ECM	9.2766	1.45926	11.4894	3.54392	6	6
408	Calfapietra et al, 2003	CO2 enrichment	RB (root biomass)	Populus nigra	AM	8.44	4.83242	10.3	3.58535	3	3
409	Eller et al, 2011	CO2 enrichment	RB (root biomass)	Acer saccharum	AM	23.0539	3.37074	22.1557	3.63003	3	3
410	Eller et al, 2011	CO2 enrichment	RB (root biomass)	Tsuga canadensis	ECM	9.73054	3.11139	15.7186	3.88932	3	3
411	Vogel et al, 1997	CO2 enrichment	RB (root biomass)	Alnus glutinosa	ECM	36.4	2.48204	57.5	4.06964	5	5
412	Calfapietra et al, 2003	CO2 enrichment	RB (root biomass)	Populus euramericana	ECM	7.87	3.58535	10.11	4.15692	3	3
413	Smith et al, 2013	CO2 enrichment	RB (root biomass)	Fagus sylvatica	AM	17.9	11.2583	14.9	4.67654	3	3
414	Uselman et al, 1999	CO2 enrichment	RB (root biomass)	Robinia pseudoacacia	ECM	3.65	1.9799	6.04	4.78004	8	8
415	Vanhatalo et al, 2003	CO2 enrichment	RB (root biomass)	Pinus sylvestris	ECM	17.04	0.68	19.72	4.9	6	6
416	Calfapietra et al, 2003	CO2 enrichment	RB (root biomass)	Populus alba	ECM	7.58	4.84974	10.46	5.12687	3	3
417	Loewe et al, 2000	CO2 enrichment	RB (root biomass)	Picea abies	ECM	20.081	5.5708	14.1215	5.1821	3	3
418	Liberloo et al, 2006	CO2 enrichment	RB (root biomass)	Populus euramericana	ECM	8.23952	1.1734	13.6048	5.3977	6	6
419	Parsons et al, 2003	CO2 enrichment	RB (root biomass)	Betula papyrifera	ECM	35.3	11.8794	52	7.07107	8	8
420	Lawson et al, 2017	CO2 enrichment	RB (root biomass)	Acacia floribunda	AM	5.64	6.6468	6.02	7.09935	8	8
421	Lawson et al, 2017	CO2 enrichment	RB (root biomass)	Eucalyptus camaldulensis	ECM	14.85	9.89949	14.32	7.29734	8	8
422	Duan et al, 2018	CO2 enrichment	RB (root biomass)	Callitris rhomboidea	AM	13.07	3.5507	16	7.93279	3	3
423	Duan et al, 2018	CO2 enrichment	RB (root biomass)	Pinus radiata	ECM	14.66	2.1131	18.91	8.00207	3	3
424	Bucher et al, 1998	CO2 enrichment	RB (root biomass)	Alnus incana	ECM	24.3	7.5	35.11	8.5	12	12
425	Major et al, 2019	CO2 enrichment	RB (root biomass)	Pinus resinosa	ECM	27.8997	8.7774	33.8558	8.7774	4	4
426	Major et al, 2019	CO2 enrichment	RB (root biomass)	Pinus strobus	ECM	43.2602	8.7774	56.1129	8.7774	4	4
427	Vanhatalo et al, 2003	CO2 enrichment	RB (root biomass)	Betula pubescens	ECM	284.81	40.35	282.19	9.23	6	6
428	Major et al, 2019	CO2 enrichment	RB (root biomass)	Pinus rigida	ECM	52.0376	8.7774	55.4859	9.4044	4	4
429	Major et al, 2019	CO2 enrichment	RB (root biomass)	Pinus banksiana	ECM	52.9781	9.4044	55.7994	9.4044	4	4
430	Elkohen et al, 1992	CO2 enrichment	RB (root biomass)	Castanea sativa	ECM	33.3806	11.0192	41.112	9.91727	6	6
431	Lawson et al, 2017	CO2 enrichment	RB (root biomass)	Casuarina cunninghamiana	AM	5.79	8.76812	10.88	10.3803	8	8
432	Smith et al, 2013	CO2 enrichment	RB (root biomass)	Betula pendula	ECM	16.4	7.79423	38	12.644	3	3
433	Duan et al, 2015	CO2 enrichment	RB (root biomass)	Abies faxoniana	ECM	162.685	9.664	164.295	12.886	4	4
434	Kim et al, 2020	CO2 enrichment	RB (root biomass)	Quercus variabilis	ECM	40.6452	7.54273	40.6452	14.2475	3	3
435	Hiraoka et al, 2017	CO2 enrichment	RB (root biomass)	Cryptomeria japonica	AM	36.9565	7.8261	58.2609	14.3478	3	3
436	Smith et al, 2013	CO2 enrichment	RB (root biomass)	Alnus glutinosa	ECM	41.1	26.3272	52.6	15.4153	3	3
437	Parsons et al, 2003	CO2 enrichment	RB (root biomass)	Acer saccharum	AM	80.4	7.9196	98.9	15.8392	8	8
438	Elkohen et al, 1992	CO2 enrichment	RB (root biomass)	Castanea sativa	ECM	33.3806	11.0192	68.1502	18.7326	6	6
439	Huang et al, 2015	CO2 enrichment	RB (root biomass)	Syzygium hancei	AM	96	27.7128	56	20.7846	3	3
440	Huang et al, 2015	CO2 enrichment	RB (root biomass)	Acmena acuminatissima	AM	108	41.5692	68	20.7846	3	3
441	Vanhatalo et al, 2003	CO2 enrichment	RB (root biomass)	Betula pubescens	ECM	48.58	15.6	116.24	21.48	6	6
442	M et al, 2017	CO2 enrichment	RB (root biomass)	Shorea platycarpa	ECM	41.51	19.5586	33.37	26.4317	18	18
443	Kitao et al, 2015	CO2 enrichment	RB (root biomass)	Quercus serrata	ECM	123.5	36.3731	123.5	36.3731	3	3
444	Walker et al, 1997	CO2 enrichment	RB (root biomass)	Pinus ponderosa	ECM	135	53.6936	157	36.3731	3	3
445	Mousseau et al, 1989	CO2 enrichment	RB (root biomass)	Castanea sativa	ECM	60.5	34	105.9	50	3	3
446	Walker et al, 1997	CO2 enrichment	RB (root biomass)	Pinus ponderosa	ECM	123.5	36.3731	135.3	55.772	3	3
447	Kitao et al, 2015	CO2 enrichment	RB (root biomass)	Quercus mongolica	ECM	133	8.66025	149	64.0859	3	3
448	Sun et al, 2018	CO2 enrichment	RB (root biomass)	Quercus mongolica	ECM	1079	79.8475	1334	76.3834	3	3
449	Huang et al, 2015	CO2 enrichment	RB (root biomass)	Castanopsis hystrix	ECM	320	62.3538	432	83.1384	3	3
450	Huang et al, 2015	CO2 enrichment	RB (root biomass)	Schima superba	AM	404	180.133	256	83.1384	3	3
451	Huang et al, 2015	CO2 enrichment	RB (root biomass)	Ormosia pinnata	AM	440	48.4974	596	138.564	3	3
452	Huang et al, 2015	CO2 enrichment	R/S (root biomass/shoot biomass)	Syzygium hancei	AM	0.23281	0.00807136	0.28664	0.00304841	3	3
453	Huang et al, 2015	CO2 enrichment	R/S (root biomass/shoot biomass)	Acmena acuminatissima	AM	0.19528	0.00744782	0.22646	0.00516151	3	3
454	Duan et al, 2009	CO2 enrichment	R/S (root biomass/shoot biomass)	Schima superba	AM	0.38596	0.02036	0.31956	0.00563	3	3
455	Huang et al, 2015	CO2 enrichment	R/S (root biomass/shoot biomass)	Castanopsis hystrix	ECM	0.31344	0.00533472	0.27526	0.00973413	3	3
456	Vanhatalo et al, 2003	CO2 enrichment	R/S (root biomass/shoot biomass)	Pinus sylvestris	ECM	0.27	0.06	0.29	0.01	6	6
457	Duan et al, 2009	CO2 enrichment	R/S (root biomass/shoot biomass)	Syzygium hancei	AM	0.25181	0.00566	0.34957	0.01005	3	3
458	Duan et al, 2009	CO2 enrichment	R/S (root biomass/shoot biomass)	Castanopsis hystrix	ECM	0.258162	0.011329	0.283631	0.010676	3	3
459	Duan et al, 2018	CO2 enrichment	R/S (root biomass/shoot biomass)	Callitris rhomboidea	AM	0.23836	0.0277821	0.17161	0.0129038	3	3
460	Vanhatalo et al, 2003	CO2 enrichment	R/S (root biomass/shoot biomass)	Picea abies	ECM	0.18	0.02	0.22	0.02	6	6
461	Vanhatalo et al, 2003	CO2 enrichment	R/S (root biomass/shoot biomass)	Betula pubescens	ECM	0.21	0.03	0.23	0.02	6	6
462	Vanhatalo et al, 2003	CO2 enrichment	R/S (root biomass/shoot biomass)	Betula pubescens	ECM	0.23	0.01	0.29	0.02	6	6
463	Bazzaz et al, 1990	CO2 enrichment	R/S (root biomass/shoot biomass)	Tsuga canadensis	ECM	0.36	0.02	0.38	0.02	4	4
464	Bazzaz et al, 1990	CO2 enrichment	R/S (root biomass/shoot biomass)	Prunus sertina	AM	0.39	0.06	0.44	0.02	4	4
465	Huang et al, 2015	CO2 enrichment	R/S (root biomass/shoot biomass)	Ormosia pinnata	AM	0.4564	0.0113969	0.39768	0.0267602	3	3
466	Duan et al, 2009	CO2 enrichment	R/S (root biomass/shoot biomass)	Ormosia pinnata	AM	0.5967	0.01422	0.5398	0.03068	3	3
467	Rochefort et al, 1992	CO2 enrichment	R/S (root biomass/shoot biomass)	Betula papyrifera	ECM	0.20395	0.0368234	0.29357	0.0309517	3	3
468	Winter et al,2000	CO2 enrichment	R/S (root biomass/shoot biomass)	Ficus insipida	AM	0.539	0.024	0.595	0.033	5	5
469	Rochefort et al, 1992	CO2 enrichment	R/S (root biomass/shoot biomass)	Betula alleghaniensis	ECM	0.27872	0.0353512	0.30399	0.0343812	3	3
470	Duan et al, 2009	CO2 enrichment	R/S (root biomass/shoot biomass)	Acmena acuminatissima	AM	0.44005	0.04229	0.42354	0.03809	3	3
471	Rochefort et al, 1992	CO2 enrichment	R/S (root biomass/shoot biomass)	Betula populifolia	ECM	0.22603	0.0399757	0.32102	0.0390058	3	3
472	Bazzaz et al, 1990	CO2 enrichment	R/S (root biomass/shoot biomass)	Acer rubrum	AM	0.21	0.04	0.24	0.04	4	4
473	Bazzaz et al, 1990	CO2 enrichment	R/S (root biomass/shoot biomass)	Betula papyrifera	ECM	0.31	0.04	0.2	0.04	4	4
474	Bazzaz et al, 1990	CO2 enrichment	R/S (root biomass/shoot biomass)	Fagus grandifolia	ECM	0.42	0.04	0.39	0.04	4	4
475	Huang et al, 2015	CO2 enrichment	R/S (root biomass/shoot biomass)	Schima superba	AM	0.36065	0.05307	0.34872	0.0404434	3	3
476	Duan et al, 2015	CO2 enrichment	R/S (root biomass/shoot biomass)	Abies faxoniana	ECM	0.41695	0.04606	0.43376	0.0494	4	4
477	Vanhatalo et al, 2003	CO2 enrichment	R/S (root biomass/shoot biomass)	Picea abies	ECM	0.21	0.02	0.26	0.05	6	6
478	Vanhatalo et al, 2003	CO2 enrichment	R/S (root biomass/shoot biomass)	Pinus sylvestris	ECM	0.29	0.02	0.19	0.05	6	6
479	Rochefort et al, 1992	CO2 enrichment	R/S (root biomass/shoot biomass)	Betula lenta	ECM	0.19479	0.0843682	0.27554	0.0524119	3	3
480	Roden et al, 1997	CO2 enrichment	R/S (root biomass/shoot biomass)	Acmena smithii	AM	0.206	0.061	0.216	0.053	7	7
481	Hatenschwiler et al, 1997	CO2 enrichment	R/S (root biomass/shoot biomass)	Picea abies	ECM	0.377	0.06755	0.448	0.0536936	3	3
482	Tschaplinski et al, 1995	CO2 enrichment	R/S (root biomass/shoot biomass)	Acer saccharum	AM	1.5369	0.467338	0.5835	0.0581378	5	5
483	Kinney et al, 1997	CO2 enrichment	R/S (root biomass/shoot biomass)	Acer saccharum	AM	0.68237	0.149394	0.33774	0.0586163	6	6
484	Wait et al, 1999	CO2 enrichment	R/S (root biomass/shoot biomass)	Populus deltoides	ECM	0.45	0.069282	0.53	0.069282	3	3
485	Hiraoka et al, 2017	CO2 enrichment	R/S (root biomass/shoot biomass)	Cryptomeria japonica	AM	0.16047	0.0694855	0.160377	0.0694454	3	3
486	Kitao et al, 2016	CO2 enrichment	R/S (root biomass/shoot biomass)	Quercus mongolica	ECM	0.585	0.0258076	0.551	0.0701481	3	3
487	Winter et al,2000	CO2 enrichment	R/S (root biomass/shoot biomass)	Virola surinamensis	AM	0.578	0.046	0.658	0.071	5	5
488	Eller et al, 2011	CO2 enrichment	R/S (root biomass/shoot biomass)	Tsuga canadensis	ECM	0.212766	0.0921304	0.2	0.0866025	3	3
489	Walker et al, 1997	CO2 enrichment	R/S (root biomass/shoot biomass)	Pinus ponderosa	ECM	0.4	0.069282	0.43	0.0866025	3	3
490	Walker et al, 1997	CO2 enrichment	R/S (root biomass/shoot biomass)	Pinus ponderosa	ECM	0.212766	0.0921304	0.204082	0.0883699	3	3
491	Kitao et al, 2016	CO2 enrichment	R/S (root biomass/shoot biomass)	Betula maximowicziana	ECM	2.0289	0.166104	2.631	0.088681	3	3
492	Vanhatalo et al, 2003	CO2 enrichment	R/S (root biomass/shoot biomass)	Picea abies	ECM	0.22	0.05	0.28	0.09	6	6
493	Polle et al, 2001	CO2 enrichment	R/S (root biomass/shoot biomass)	Quercus ilex	ECM	1.1	0.3	0.6	0.1	6	6
494	Atwell et al, 2009	CO2 enrichment	R/S (root biomass/shoot biomass)	Eucalyptus pauciflora	ECM	0.290698	0.125876	0.232019	0.100467	3	3
495	Roden et al, 1997	CO2 enrichment	R/S (root biomass/shoot biomass)	Doryphora sassafras	AM	0.348	0.059	0.362	0.102	7	7
496	Duan et al, 2018	CO2 enrichment	R/S (root biomass/shoot biomass)	Pinus radiata	ECM	0.38685	0.0588031	0.47985	0.103525	3	3
497	Vogel et al, 1997	CO2 enrichment	R/S (root biomass/shoot biomass)	Alnus glutinosa	ECM	1.09	0.0894427	1.15	0.111803	5	5
498	Atwell et al, 2009	CO2 enrichment	R/S (root biomass/shoot biomass)	Eucalyptus pauciflora	ECM	0.278552	0.120616	0.278552	0.120616	3	3
499	Eller et al, 2011	CO2 enrichment	R/S (root biomass/shoot biomass)	Acer saccharum	AM	1.32	0.0866025	1.2	0.121244	3	3
500	Hatenschwiler et al, 1997	CO2 enrichment	R/S (root biomass/shoot biomass)	Picea abies	ECM	0.377	0.06755	0.465	0.122976	3	3
501	Tschaplinski et al, 1995	CO2 enrichment	R/S (root biomass/shoot biomass)	Liquidambar styraciflua	AM	1.0544	0.149146	0.9764	0.131704	5	5
502	Kitao et al, 2015	CO2 enrichment	R/S (root biomass/shoot biomass)	Quercus serrata	ECM	1.29	0.103923	1.35	0.138564	3	3
503	Bazzaz et al, 1990	CO2 enrichment	R/S (root biomass/shoot biomass)	Acer saccharum	AM	0.77	0.14	0.86	0.14	4	4
504	Kinney et al, 1997	CO2 enrichment	R/S (root biomass/shoot biomass)	Quercus rubra	ECM	0.93214	0.0544767	0.85197	0.143099	6	6
505	Chen et al, 2021	CO2 enrichment	R/S (root biomass/shoot biomass)	Populus cathayana	AM	0.96225	0.145745	1.16255	0.16196	6	6
506	Chen et al, 2021	CO2 enrichment	R/S (root biomass/shoot biomass)	Populus cathayana	AM	1.25879	0.191403	0.95122	0.163405	6	6
507	Walker et al, 1998	CO2 enrichment	R/S (root biomass/shoot biomass)	Pinus ponderosa	ECM	0.358423	0.200365	0.294118	0.164417	5	5
508	Walker et al, 1998	CO2 enrichment	R/S (root biomass/shoot biomass)	Pinus ponderosa	ECM	0.358423	0.200365	0.294118	0.164417	5	5
509	M et al, 2017	CO2 enrichment	R/S (root biomass/shoot biomass)	Shorea platycarpa	ECM	0.31	0.0848528	0.4	0.169706	18	18
510	Kitao et al, 2016	CO2 enrichment	R/S (root biomass/shoot biomass)	Betula platyphylla	ECM	0.388621	0.168278	0.395977	0.171463	3	3
511	Polle et al, 2001	CO2 enrichment	R/S (root biomass/shoot biomass)	Quercus ilex	ECM	1.1	0.3	1.5	0.2	6	6
512	Godbold et al, 1997	CO2 enrichment	R/S (root biomass/shoot biomass)	Pinus strobus	ECM	0.290698	0.162505	0.37037	0.207043	5	5
513	Bazzaz et al, 1990	CO2 enrichment	R/S (root biomass/shoot biomass)	Pinus strobus	ECM	0.97	0.14	1.08	0.22	4	4
514	Kitao et al, 2015	CO2 enrichment	R/S (root biomass/shoot biomass)	Quercus mongolica	ECM	1	0.0519615	0.93	0.225167	3	3
515	Kitao et al, 2016	CO2 enrichment	R/S (root biomass/shoot biomass)	Acer mono	AM	1.0103	0.118126	1.375	0.237464	3	3
516	Tschaplinski et al, 1995	CO2 enrichment	R/S (root biomass/shoot biomass)	Platanus occidentalis	AM	1.2187	0.138189	1.092	0.238141	5	5
517	Kinney et al, 1997	CO2 enrichment	R/S (root biomass/shoot biomass)	Populus tremuloides	AM	0.56058	0.101237	0.709	0.265966	6	6
518	Vanhatalo et al, 2003	CO2 enrichment	R/S (root biomass/shoot biomass)	Picea abies	ECM	0.2	0.03	11.98	0.48	6	6
519	Godbold et al, 1997	CO2 enrichment	R/S (root biomass/shoot biomass)	Betula papyrifera	ECM	0.884956	0.494705	1	0.559017	5	5
520	Godbold et al, 1997	CO2 enrichment	R/S (root biomass/shoot biomass)	Tsuga canadensis	ECM	1.36986	0.765777	1.92308	1.07503	5	5
521	Warrier et al, 2013	CO2 enrichment	R/S (root biomass/shoot biomass)	Ailanthus excelsa	AM	6.12	2.39	6.51	1.68	5	5
522	Warrier et al, 2013	CO2 enrichment	R/S (root biomass/shoot biomass)	Tectona grandis	AM	1.5	0.48	2.54	1.77	5	5
523	Warrier et al, 2013	CO2 enrichment	R/S (root biomass/shoot biomass)	Casuarina equisetifolia	AM	3.79	1.57	4.82	2.22	5	5
524	Winter et al,2000	CO2 enrichment	LB (leaf biomass)	Virola surinamensis	AM	0.027	0.008	0.022	0.008	5	5
525	Bassow et al, 1994	CO2 enrichment	LB (leaf biomass)	Betula alleghaniensis	ECM	0.666	0.0207846	0.689	0.0294449	3	3
526	Liu et al, 2004	CO2 enrichment	LB (leaf biomass)	Picea abies	ECM	2.31	0.03	2.06	0.03	6	6
527	Chen et al, 2021	CO2 enrichment	LB (leaf biomass)	Populus cathayana	AM	0.813333	0.0653205	0.853333	0.0326615	6	6
528	Bassow et al, 1994	CO2 enrichment	LB (leaf biomass)	Betula populifolia	ECM	0.648	0.0207846	0.777	0.032909	3	3
529	Danyagri et al, 2014	CO2 enrichment	LB (leaf biomass)	Acer spicatum	AM	0.43964	0.0455811	0.464865	0.0341874	10	10
530	Hatenschwiler et al, 1997	CO2 enrichment	LB (leaf biomass)	Picea abies	ECM	1.18	0.103923	1.56	0.034641	3	3
531	Liu et al, 2004	CO2 enrichment	LB (leaf biomass)	Fagus sylvatica	AM	2.27	0.03	2.24	0.04	6	6
532	Hatenschwiler et al, 1997	CO2 enrichment	LB (leaf biomass)	Picea abies	ECM	1.18	0.103923	1.36	0.0519615	3	3
533	Chae et al, 2016	CO2 enrichment	LB (leaf biomass)	Quercus acutissima	ECM	0.482	0.042	0.472	0.055	4	4
534	Chae et al, 2016	CO2 enrichment	LB (leaf biomass)	Quercus mongolica	ECM	0.796	0.066	1.058	0.06	4	4
535	Chen et al, 2021	CO2 enrichment	LB (leaf biomass)	Populus cathayana	AM	0.826667	0.032659	1.21333	0.0653279	6	6
536	Kurepin et al, 2018	CO2 enrichment	LB (leaf biomass)	Pinus sylvestris	ECM	0.421053	0.0665723	0.470175	0.0665754	10	10
537	Kurepin et al, 2018	CO2 enrichment	LB (leaf biomass)	Picea abies	ECM	0.350877	0.055479	0.336842	0.0776719	10	10
538	Olesniewicz et al, 1999	CO2 enrichment	LB (leaf biomass)	Robinia pseudoacacia	ECM	0.573	0.140296	1.836	0.0848705	3	3
539	Ambebe et al, 2009	CO2 enrichment	LB (leaf biomass)	Betula papyrifera	ECM	0.929889	0.088561	0.664207	0.088561	4	4
540	Winter et al,2000	CO2 enrichment	LB (leaf biomass)	Ficus insipida	AM	0.536	0.113	0.647	0.106	5	5
541	Chae et al, 2016	CO2 enrichment	LB (leaf biomass)	Quercus serrata	ECM	1.625	0.257	0.999	0.115	4	4
542	Calfapietra et al, 2007	CO2 enrichment	LB (leaf biomass)	Populus nigra	AM	2.55	0.269444	2.31	0.122474	6	6
543	Chae et al, 2016	CO2 enrichment	LB (leaf biomass)	Quercus variabilis	ECM	2.256	0.124	2.179	0.148	4	4
544	Bucher et al, 1998	CO2 enrichment	LB (leaf biomass)	Fraxinus excelsior	AM	0.9	0.4	0.9	0.2	12	12
545	Fondo et al, 2010	CO2 enrichment	LB (leaf biomass)	Betula papyrifera	ECM	2.14765	0.161074	3.00671	0.214765	3	3
546	Roden et al, 1997	CO2 enrichment	LB (leaf biomass)	Acmena smithii	AM	0.49	0.217	0.652	0.222	7	7
547	Zhao et al, 2011	CO2 enrichment	LB (leaf biomass)	Populus cathayana	AM	3.69	0.268328	4.83	0.290689	5	5
548	Calfapietra et al, 2007	CO2 enrichment	LB (leaf biomass)	Populus alba	ECM	2.69	0.244949	2.26	0.293939	6	6
549	Vanhatalo et al, 2003	CO2 enrichment	LB (leaf biomass)	Picea abies	ECM	14.9	3.08	18.14	0.32	6	6
550	Calfapietra et al, 2007	CO2 enrichment	LB (leaf biomass)	Populus euramericana	ECM	2.77	0.0244949	2.25	0.367423	6	6
551	Lia et al, 2018	CO2 enrichment	LB (leaf biomass)	Acer saccharum	AM	1.46444	0.1046	4.91632	0.41841	3	3
552	Veteli et al, 2002	CO2 enrichment	LB (leaf biomass)	Salix myrsinifolia	ECM	4.51737	0.50194	5.40541	0.42471	4	4
553	Rasineni et al, 2011	CO2 enrichment	LB (leaf biomass)	Gmelina arborea	AM	2.3619	0.22858	4.34286	0.45714	4	4
554	Zhao et al, 2011	CO2 enrichment	LB (leaf biomass)	Populus cathayana	AM	3.51	0.223607	5.35	0.469574	5	5
555	Vanhatalo et al, 2003	CO2 enrichment	LB (leaf biomass)	Picea abies	ECM	12.56	0.06	11.98	0.48	6	6
556	Bucher et al, 1998	CO2 enrichment	LB (leaf biomass)	Fagus sylvatica	AM	0.8	0.5	0.7	0.5	10	10
557	Veteli et al, 2002	CO2 enrichment	LB (leaf biomass)	Salix myrsinifolia	ECM	4.51737	0.50194	4.01544	0.50193	4	4
558	Rochefort et al, 1992	CO2 enrichment	LB (leaf biomass)	Betula papyrifera	ECM	2.016	0.69282	3.93	0.519615	3	3
559	Lia et al, 2018	CO2 enrichment	LB (leaf biomass)	Acer saccharum	AM	1.46444	0.1046	3.55649	0.52301	3	3
560	Bassow et al, 1994	CO2 enrichment	LB (leaf biomass)	Acer pensylvanicum	AM	0.891	0.443405	0.977	0.528275	3	3
561	Bucher et al, 1998	CO2 enrichment	LB (leaf biomass)	Quercus robur	ECM	1.2	0.4	1.3	0.6	12	12
562	Roden et al, 1997	CO2 enrichment	LB (leaf biomass)	Doryphora sassafras	AM	1.35	0.593	1.913	0.632	7	7
563	Rochefort et al, 1992	CO2 enrichment	LB (leaf biomass)	Betula alleghaniensis	ECM	2.298	0.519615	3.977	0.69282	3	3
564	Vogel et al, 1997	CO2 enrichment	LB (leaf biomass)	Alnus glutinosa	ECM	11.7	1.49817	15.9	0.782624	5	5
565	Rochefort et al, 1992	CO2 enrichment	LB (leaf biomass)	Betula lenta	ECM	3.017	1.90526	4.254	1.03923	3	3
566	Thomas et al, 2000	CO2 enrichment	LB (leaf biomass)	Gliricidia sepium	AM	8.04	1.4376	10.56	1.2644	3	3
567	Eller et al, 2011	CO2 enrichment	LB (leaf biomass)	Acer saccharum	AM	9	1.19912	9.69231	1.39896	3	3
568	Major et al, 2019	CO2 enrichment	LB (leaf biomass)	Picea rubens	ECM	40.3941	1.4778	41.133	1.4778	4	4
569	Major et al, 2019	CO2 enrichment	LB (leaf biomass)	Picea abies	ECM	31.5271	1.4778	31.0837	1.478	4	4
570	Major et al, 2019	CO2 enrichment	LB (leaf biomass)	Picea glauca	ECM	33.4483	1.7734	32.8571	1.478	4	4
571	Rochefort et al, 1992	CO2 enrichment	LB (leaf biomass)	Betula populifolia	ECM	2.897	1.03923	5.646	1.55885	3	3
572	Lewis et al, 2013	CO2 enrichment	LB (leaf biomass)	Eucalyptus sideroxylon	ECM	5.1	2.23607	7.4	1.56525	5	5
573	Major et al, 2019	CO2 enrichment	LB (leaf biomass)	Pinus resinosa	ECM	38.867	1.5764	39.064	1.5764	4	4
574	Major et al, 2019	CO2 enrichment	LB (leaf biomass)	Pinus rigida	ECM	62.7094	1.5762	60.7389	1.5764	4	4
575	Watanabe et al, 2011	CO2 enrichment	LB (leaf biomass)	Larix gmelinii	ECM	10.3	2.9	17.8	1.6	3	3
576	Vanhatalo et al, 2003	CO2 enrichment	LB (leaf biomass)	Picea abies	ECM	14.52	2.01	12.24	1.63	6	6
577	Major et al, 2019	CO2 enrichment	LB (leaf biomass)	Picea mariana	ECM	37.8818	1.7734	37.734	1.7734	4	4
578	Vanhatalo et al, 2003	CO2 enrichment	LB (leaf biomass)	Picea abies	ECM	15.81	3.55	17.97	1.88	6	6
579	Major et al, 2019	CO2 enrichment	LB (leaf biomass)	Pinus strobus	ECM	43.0049	1.5764	38.867	1.9704	4	4
580	Major et al, 2019	CO2 enrichment	LB (leaf biomass)	Pinus banksiana	ECM	49.7044	1.5764	47.734	1.9704	4	4
581	Hollinger et al, 1987	CO2 enrichment	LB (leaf biomass)	Nothofagus fusca	ECM	29.0265	3.6363	24.5572	2.0202	3	3
582	Lewis et al, 2013	CO2 enrichment	LB (leaf biomass)	Eucalyptus sideroxylon	ECM	5.1	2.23607	9.3	2.23607	5	5
583	Vanhatalo et al, 2003	CO2 enrichment	LB (leaf biomass)	Pinus sylvestris	ECM	21.44	0.86	15.4	2.43	6	6
584	Lewis et al, 2013	CO2 enrichment	LB (leaf biomass)	Eucalyptus saligna	ECM	10.4	3.3541	16.2	2.68328	5	5
585	Hollinger et al, 1987	CO2 enrichment	LB (leaf biomass)	Pinus rudiata	ECM	55.4726	2.8	55.4726	2.8	3	3
586	Eller et al, 2011	CO2 enrichment	LB (leaf biomass)	Tsuga canadensis	ECM	9.23077	2.99771	16.3846	3.39759	3	3
587	Major et al, 2015	CO2 enrichment	LB (leaf biomass)	Picea mariana	ECM	17.5	3.4641	19	3.4641	3	3
588	Hollinger et al, 1987	CO2 enrichment	LB (leaf biomass)	Pseudotsuga menziesii	ECM	35.5353	4.3999	34.3106	3.5999	3	3
589	Major et al, 2015	CO2 enrichment	LB (leaf biomass)	Picea rubens	ECM	13.3	3.81051	14.8	3.63731	3	3
590	Major et al, 2015	CO2 enrichment	LB (leaf biomass)	Picea rubens	ECM	30	3.63731	33.6	3.63731	3	3
591	Major et al, 2015	CO2 enrichment	LB (leaf biomass)	Picea mariana	ECM	32.1	3.63731	31.6	3.63731	3	3
592	Major et al, 2015	CO2 enrichment	LB (leaf biomass)	Picea rubens	ECM	37.3	3.63731	37.7	3.63731	3	3
593	Vanhatalo et al, 2003	CO2 enrichment	LB (leaf biomass)	Pinus sylvestris	ECM	30.51	3.61	29.53	3.76	6	6
594	Major et al, 2015	CO2 enrichment	LB (leaf biomass)	Picea mariana	ECM	15.9	3.63731	19.8	3.81051	3	3
595	Wang et al, 2001	CO2 enrichment	LB (leaf biomass)	Populus tremuloides	AM	12.1	1.16	19.1	4.38	4	4
596	Kim et al, 2020	CO2 enrichment	LB (leaf biomass)	Pinus densiflra	ECM	85.6452	3.35221	66.2903	5.02849	3	3
597	Kim et al, 2020	CO2 enrichment	LB (leaf biomass)	Quercus variabilis	ECM	63.871	5.02849	69.6774	5.86663	3	3
598	Duan et al, 2018	CO2 enrichment	LB (leaf biomass)	Pinus radiata	ECM	18.77	2.35559	18.26	5.95825	3	3
599	Bucher et al, 1998	CO2 enrichment	LB (leaf biomass)	Alnus incana	ECM	23.2	7.7	32.7	6.7	12	12
600	Sun et al, 2018	CO2 enrichment	LB (leaf biomass)	Quercus mongolica	ECM	98.8	6.9282	120.6	6.755	3	3
601	Duan et al, 2018	CO2 enrichment	LB (leaf biomass)	Callitris rhomboidea	AM	27.27	5.24811	29.85	6.9282	3	3
602	Wang et al, 2001	CO2 enrichment	LB (leaf biomass)	Populus tremuloides	AM	18.7	4.66	22.9	7.7	4	4
603	Kitao et al, 2015	CO2 enrichment	LB (leaf biomass)	Quercus serrata	ECM	66	20.7846	71	10.3923	3	3
604	Kitao et al, 2015	CO2 enrichment	LB (leaf biomass)	Quercus mongolica	ECM	38	3.4641	43	12.1244	3	3
605	Lewis et al, 2013	CO2 enrichment	LB (leaf biomass)	Eucalyptus saligna	ECM	10.4	3.3541	13.1	13.4164	5	5
606	Verburg et al, 2004	CO2 enrichment	LB (leaf biomass)	Pinus jeffreyi	ECM	48.3243	10.3784	55.4595	22.7026	4	4
607	Vanhatalo et al, 2003	CO2 enrichment	LB (leaf biomass)	Betula pubescens	ECM	65.52	6	118.54	26.26	6	6
608	Vanhatalo et al, 2003	CO2 enrichment	LB (leaf biomass)	Betula pubescens	ECM	217.07	35.44	198.86	35.42	6	6
609	Polle et al, 2001	CO2 enrichment	LB (leaf biomass)	Quercus ilex	ECM	231	71	219	38	6	6
610	Polle et al, 2001	CO2 enrichment	LB (leaf biomass)	Quercus ilex	ECM	238	57	285	47	6	6
611	Janssens et al, 2005	CO2 enrichment	LB (leaf biomass)	Pinus sylvestris	ECM	259	48	289	132	4	4
612	Watanabe et al, 2016	CO2 enrichment	LB (leaf biomass)	Larix kaempferi	ECM	165.8	287.347	221	244.912	3	3
613	Watanabe et al, 2016	CO2 enrichment	LB (leaf biomass)	Kalopanax septemlobus	AM	436.3	542.998	755.9	323.027	3	3
614	Watanabe et al, 2016	CO2 enrichment	LB (leaf biomass)	Betula platyphylla	ECM	314.6	278.687	1170.9	1146.27	3	3
615	Polle et al, 1999	CO2 enrichment	SB (stem biomass)	Prosopis glandulosa	AM	0.093	0.0034641	0.142	0.00519615	3	3
616	Polle et al, 1999	CO2 enrichment	SB (stem biomass)	Prosopis glandulosa	AM	0.059	0.00173205	0.086	0.0069282	3	3
617	Winter et al,2000	CO2 enrichment	SB (stem biomass)	Virola surinamensis	AM	0.025	0.008	0.025	0.008	5	5
618	Bassow et al, 1994	CO2 enrichment	SB (stem biomass)	Betula populifolia	ECM	0.304	0.0138564	0.416	0.0173205	3	3
619	Bassow et al, 1994	CO2 enrichment	SB (stem biomass)	Betula alleghaniensis	ECM	0.295	0.0121244	0.437	0.0190526	3	3
620	Ambebe et al, 2009	CO2 enrichment	SB (stem biomass)	Betula papyrifera	ECM	0.509554	0.063694	0.605096	0.031847	4	4
621	Chae et al, 2016	CO2 enrichment	SB (stem biomass)	Quercus mongolica	ECM	0.499	0.047	0.638	0.036	4	4
622	Chae et al, 2016	CO2 enrichment	SB (stem biomass)	Quercus acutissima	ECM	0.283	0.031	0.316	0.04	4	4
623	Chen et al, 2021	CO2 enrichment	SB (stem biomass)	Populus cathayana	AM	0.94	0.0244949	0.85	0.0489898	6	6
624	Hatenschwiler et al, 1997	CO2 enrichment	SB (stem biomass)	Picea abies	ECM	1.45	0.034641	1.53	0.0519615	3	3
625	Lawson et al, 2017	CO2 enrichment	SB (stem biomass)	Eucalyptus camaldulensis	ECM	0.39	0.0565685	0.41	0.0565685	8	8
626	Lawson et al, 2017	CO2 enrichment	SB (stem biomass)	Casuarina cunninghamiana	AM	0.4	0.0848528	0.44	0.0565685	8	8
627	Chae et al, 2016	CO2 enrichment	SB (stem biomass)	Quercus serrata	ECM	0.977	0.197	0.581	0.086	4	4
628	Kurepin et al, 2018	CO2 enrichment	SB (stem biomass)	Pinus sylvestris	ECM	0.576159	0.0753919	0.524503	0.0879588	10	10
629	Kurepin et al, 2018	CO2 enrichment	SB (stem biomass)	Picea abies	ECM	0.643709	0.0502612	0.655629	0.0879588	10	10
630	Chen et al, 2021	CO2 enrichment	SB (stem biomass)	Populus cathayana	AM	0.74	0.0734847	1.01	0.0979796	6	6
631	Fondo et al, 2010	CO2 enrichment	SB (stem biomass)	Betula papyrifera	ECM	1.56688	0.11465	1.83439	0.11465	3	3
632	Chae et al, 2016	CO2 enrichment	SB (stem biomass)	Quercus variabilis	ECM	1.72	0.114	1.473	0.125	4	4
633	Lawson et al, 2017	CO2 enrichment	SB (stem biomass)	Acacia floribunda	AM	0.46	0.19799	0.48	0.141421	8	8
634	Hatenschwiler et al, 1997	CO2 enrichment	SB (stem biomass)	Picea abies	ECM	1.45	0.034641	1.62	0.155885	3	3
635	Vanhatalo et al, 2003	CO2 enrichment	SB (stem biomass)	Picea abies	ECM	21.95	1.12	33.21	0.17	6	6
636	Roden et al, 1997	CO2 enrichment	SB (stem biomass)	Acmena smithii	AM	0.371	0.085	0.636	0.257	7	7
637	Bassow et al, 1994	CO2 enrichment	SB (stem biomass)	Acer pensylvanicum	AM	0.409	0.259808	0.559	0.356802	3	3
638	Veteli et al, 2002	CO2 enrichment	SB (stem biomass)	Salix myrsinifolia	ECM	6.61004	0.49421	7.16602	0.49421	4	4
639	Rasineni et al, 2011	CO2 enrichment	SB (stem biomass)	Gmelina arborea	AM	4.04211	0.37894	6.88421	0.63158	4	4
640	Rochefort et al, 1992	CO2 enrichment	SB (stem biomass)	Betula lenta	ECM	1.466	1.03923	2.417	0.69282	3	3
641	Thomas et al, 2000	CO2 enrichment	SB (stem biomass)	Gliricidia sepium	AM	5.85	0.606218	8.78	0.796743	3	3
642	Veteli et al, 2002	CO2 enrichment	SB (stem biomass)	Salix myrsinifolia	ECM	6.61004	0.49421	6.79537	0.80309	4	4
643	Liberloo et al, 2006	CO2 enrichment	SB (stem biomass)	Populus nigra	AM	4.0122	0.62729	2.9878	0.836427	6	6
644	Vanhatalo et al, 2003	CO2 enrichment	SB (stem biomass)	Picea abies	ECM	15.64	1.42	13.39	0.87	6	6
645	Zhao et al, 2011	CO2 enrichment	SB (stem biomass)	Populus cathayana	AM	3.78	0.31305	3.51	1.00623	5	5
646	Warrier et al, 2013	CO2 enrichment	SB (stem biomass)	Ailanthus excelsa	AM	0.95	0.89	1.45	1.05	5	5
647	Vanhatalo et al, 2003	CO2 enrichment	SB (stem biomass)	Picea abies	ECM	19.21	0.84	17.14	1.14	6	6
648	Major et al, 2019	CO2 enrichment	SB (stem biomass)	Pinus banksiana	ECM	41.1429	1.1428	43.4286	1.1428	4	4
649	Hollinger et al, 1987	CO2 enrichment	SB (stem biomass)	Pseudotsuga menziesii	ECM	25.4355	4.3999	24.6097	1.1999	3	3
650	Warrier et al, 2013	CO2 enrichment	SB (stem biomass)	Casuarina equisetifolia	AM	0.77	0.9	1.19	1.26	5	5
651	Lewis et al, 2013	CO2 enrichment	SB (stem biomass)	Eucalyptus saligna	ECM	7.8	2.68328	8.5	1.34164	5	5
652	Lewis et al, 2013	CO2 enrichment	SB (stem biomass)	Eucalyptus saligna	ECM	7.8	2.68328	13.4	1.34164	5	5
653	Eller et al, 2011	CO2 enrichment	SB (stem biomass)	Acer saccharum	AM	8.85417	1.50351	9.375	1.50359	3	3
654	Major et al, 2019	CO2 enrichment	SB (stem biomass)	Picea abies	ECM	39.5261	1.5166	42.5592	1.5166	4	4
655	Major et al, 2019	CO2 enrichment	SB (stem biomass)	Picea mariana	ECM	42.9384	1.1374	45.4028	1.5166	4	4
656	Major et al, 2019	CO2 enrichment	SB (stem biomass)	Picea rubens	ECM	44.2654	1.5166	47.2986	1.5166	4	4
657	Major et al, 2019	CO2 enrichment	SB (stem biomass)	Picea glauca	ECM	45.9716	1.5166	46.1611	1.5166	4	4
658	Vanhatalo et al, 2003	CO2 enrichment	SB (stem biomass)	Pinus sylvestris	ECM	28.26	2.57	20.74	1.52	6	6
659	Major et al, 2019	CO2 enrichment	SB (stem biomass)	Pinus rigida	ECM	26.0952	1.143	24.9524	1.5238	4	4
660	Major et al, 2019	CO2 enrichment	SB (stem biomass)	Pinus strobus	ECM	32	1.5238	32.381	1.5238	4	4
661	Major et al, 2019	CO2 enrichment	SB (stem biomass)	Pinus resinosa	ECM	44	1.5238	45.7143	1.5238	4	4
662	Liberloo et al, 2006	CO2 enrichment	SB (stem biomass)	Populus alba	ECM	4.08511	0.833855	4.93617	1.66774	6	6
663	Warrier et al, 2013	CO2 enrichment	SB (stem biomass)	Tectona grandis	AM	1.81	1.54	2.12	1.87	5	5
664	Hollinger et al, 1987	CO2 enrichment	SB (stem biomass)	Pinus rudiata	ECM	19.6737	2	18.4223	2.4	3	3
665	Atwell et al, 2009	CO2 enrichment	SB (stem biomass)	Eucalyptus pauciflora	ECM	5.3	1.73205	8.8	2.77128	3	3
666	Watanabe et al, 2011	CO2 enrichment	SB (stem biomass)	Larix gmelinii	ECM	13.8	4.2	17.1	3.6	3	3
667	Vanhatalo et al, 2003	CO2 enrichment	SB (stem biomass)	Picea abies	ECM	29.61	4.88	29.83	3.74	6	6
668	Duan et al, 2018	CO2 enrichment	SB (stem biomass)	Callitris rhomboidea	AM	10.91	2.09578	16.58	3.84515	3	3
669	Eller et al, 2011	CO2 enrichment	SB (stem biomass)	Tsuga canadensis	ECM	14.4097	3.3077	22.2222	3.90924	3	3
670	Hollinger et al, 1987	CO2 enrichment	SB (stem biomass)	Nothofagus fusca	ECM	29.3284	2.8282	31.7276	4.0403	3	3
671	Kim et al, 2020	CO2 enrichment	SB (stem biomass)	Pinus densiflra	ECM	45.9677	5.02866	37.7419	4.19052	3	3
672	Calfapietra et al, 2003	CO2 enrichment	SB (stem biomass)	Populus nigra	AM	42.01	4.46869	47.78	4.45137	3	3
673	Major et al, 2015	CO2 enrichment	SB (stem biomass)	Picea mariana	ECM	17.1	4.84974	21	4.84974	3	3
674	Duan et al, 2018	CO2 enrichment	SB (stem biomass)	Pinus radiata	ECM	10.09	1.57617	10.84	5.00563	3	3
675	Major et al, 2015	CO2 enrichment	SB (stem biomass)	Picea rubens	ECM	36.6	5.02295	47.2	5.02295	3	3
676	Major et al, 2015	CO2 enrichment	SB (stem biomass)	Picea rubens	ECM	41.3	5.02295	46.4	5.02295	3	3
677	Major et al, 2015	CO2 enrichment	SB (stem biomass)	Picea rubens	ECM	44.9	5.19615	47.3	5.02295	3	3
678	Calfapietra et al, 2003	CO2 enrichment	SB (stem biomass)	Populus euramericana	ECM	31.71	4.6419	39.82	5.07491	3	3
679	Major et al, 2015	CO2 enrichment	SB (stem biomass)	Picea mariana	ECM	12	5.19615	15	5.19615	3	3
680	Major et al, 2015	CO2 enrichment	SB (stem biomass)	Picea mariana	ECM	16.5	5.19615	21.6	5.19615	3	3
681	Atwell et al, 2009	CO2 enrichment	SB (stem biomass)	Eucalyptus pauciflora	ECM	15.3	3.4641	24.2	5.54256	3	3
682	Calfapietra et al, 2003	CO2 enrichment	SB (stem biomass)	Populus alba	ECM	28.87	6.32199	38.23	5.68113	3	3
683	Vogel et al, 1997	CO2 enrichment	SB (stem biomass)	Alnus glutinosa	ECM	22.6	1.9901	35.7	5.99266	5	5
684	Vanhatalo et al, 2003	CO2 enrichment	SB (stem biomass)	Pinus sylvestris	ECM	39.68	4.49	34.66	6.56	6	6
685	Elkohen et al, 1992	CO2 enrichment	SB (stem biomass)	Castanea sativa	ECM	15.6135	3.85671	17.8335	6.61151	6	6
686	Kim et al, 2020	CO2 enrichment	SB (stem biomass)	Quercus variabilis	ECM	52.2581	5.02849	55.1613	6.70477	3	3
687	Kitao et al, 2015	CO2 enrichment	SB (stem biomass)	Quercus mongolica	ECM	58	3.4641	47	6.9282	3	3
688	Wang et al, 2001	CO2 enrichment	SB (stem biomass)	Populus tremuloides	AM	25.8	7.06	28.3	11.58	4	4
689	Mousseau et al, 1989	CO2 enrichment	SB (stem biomass)	Castanea sativa	ECM	29.9	13.5	23.2	14	3	3
690	Verburg et al, 2004	CO2 enrichment	SB (stem biomass)	Pinus jeffreyi	ECM	70.7027	12.973	87.5676	25.2968	4	4
691	Hiraoka et al, 2017	CO2 enrichment	SB (stem biomass)	Cryptomeria japonica	AM	64.3478	16.5218	106.087	27.826	3	3
692	Kitao et al, 2015	CO2 enrichment	SB (stem biomass)	Quercus serrata	ECM	82	31.1769	103	36.3731	3	3
693	Ceulemans et al, 2002	CO2 enrichment	SB (stem biomass)	Pinus sylvestris	ECM	359.055	81.0071	540.945	66.5404	6	6
694	Sun et al, 2018	CO2 enrichment	SB (stem biomass)	Quercus mongolica	ECM	1064.3	90.0666	1368.1	89.3738	3	3
695	Janssens et al, 2005	CO2 enrichment	SB (stem biomass)	Pinus sylvestris	ECM	273	56	384	118	4	4
696	Walker et al, 1997	CO2 enrichment	SB (stem biomass)	Pinus ponderosa	ECM	619	205.941	685.3	161.6	3	3
697	Watanabe et al, 2016	CO2 enrichment	SB (stem biomass)	Larix kaempferi	ECM	356	552.524	594	360.093	3	3
698	Watanabe et al, 2016	CO2 enrichment	SB (stem biomass)	Betula platyphylla	ECM	1479.5	651.771	2335.4	969.948	3	3
699	Watanabe et al, 2016	CO2 enrichment	SB (stem biomass)	Kalopanax septemlobus	AM	2482.5	3540.83	2382.6	1747.81	3	3
700	Liu et al, 2004	CO2 enrichment	CRB (coarse root biomass)	Picea abies	ECM	3.06	0.1	3.09	0.11	6	6
701	Calfapietra et al, 2007	CO2 enrichment	CRB (coarse root biomass)	Populus alba	ECM	0.96	0.710352	0.46	0.195959	6	6
702	Calfapietra et al, 2007	CO2 enrichment	CRB (coarse root biomass)	Populus nigra	AM	1.14	0.563383	0.46	0.220454	6	6
703	Godbold et al, 1997	CO2 enrichment	CRB (coarse root biomass)	Pinus strobus	ECM	0.3	0.223607	0.5	0.223607	5	5
704	Godbold et al, 1997	CO2 enrichment	CRB (coarse root biomass)	Tsuga canadensis	ECM	0.4	0.223607	0.7	0.223607	5	5
705	Liu et al, 2004	CO2 enrichment	CRB (coarse root biomass)	Fagus sylvatica	AM	3.6	0.95	2.63	0.26	6	6
706	Calfapietra et al, 2007	CO2 enrichment	CRB (coarse root biomass)	Populus euramericana	ECM	0.78	0.293939	0.58	0.440908	6	6
707	Liberloo et al, 2006	CO2 enrichment	CRB (coarse root biomass)	Populus nigra	AM	5.54878	0.627314	7.76829	1.46372	6	6
708	Godbold et al, 1997	CO2 enrichment	CRB (coarse root biomass)	Betula papyrifera	ECM	9.9	2.01246	11.2	1.56525	5	5
709	Liberloo et al, 2006	CO2 enrichment	CRB (coarse root biomass)	Populus alba	ECM	5.19149	0.833855	6.55319	1.87621	6	6
710	Hollinger et al, 1987	CO2 enrichment	CRB (coarse root biomass)	Pseudotsuga menziesii	ECM	10.8346	1.6	11.2099	2	3	3
711	Hollinger et al, 1987	CO2 enrichment	CRB (coarse root biomass)	Nothofagus fusca	ECM	18.6205	2.0202	20.2117	2.0201	3	3
712	Calfapietra et al, 2003	CO2 enrichment	CRB (coarse root biomass)	Populus euramericana	ECM	4.92	2.1997	5.65	2.37291	3	3
713	Hollinger et al, 1987	CO2 enrichment	CRB (coarse root biomass)	Pinus rudiata	ECM	8.07151	1.99999	9.22235	2.39995	3	3
714	Calfapietra et al, 2003	CO2 enrichment	CRB (coarse root biomass)	Populus nigra	AM	5.71	4.26084	6.43	2.52879	3	3
715	Liberloo et al, 2006	CO2 enrichment	CRB (coarse root biomass)	Populus euramericana	ECM	5.94012	0.938718	6.8024	2.81618	6	6
716	Calfapietra et al, 2003	CO2 enrichment	CRB (coarse root biomass)	Populus alba	ECM	4.93	2.96181	5.68	3.18697	3	3
717	Wang et al, 2001	CO2 enrichment	CRB (coarse root biomass)	Populus tremuloides	AM	26.4	3.24	45.8	11.6	4	4
718	Lagomarsino et al, 2013	CO2 enrichment	CRB (coarse root biomass)	Populus	AM	255.184	52.7146	135.786	12.1649	3	3
719	Smith et al, 2013	CO2 enrichment	CRB (coarse root biomass)	Alnus glutinosa	ECM	342.857	136.091	171.429	12.3703	3	3
720	Duan et al, 2015	CO2 enrichment	CRB (coarse root biomass)	Abies faxoniana	ECM	115.973	7.248	117.181	14.498	4	4
721	Wang et al, 2001	CO2 enrichment	CRB (coarse root biomass)	Populus tremuloides	AM	36.5	5.4	45.5	15.7	4	4
722	Verburg et al, 2004	CO2 enrichment	CRB (coarse root biomass)	Pinus jeffreyi	ECM	44.4324	12.973	54.1622	18.8108	4	4
723	Walker et al, 1998	CO2 enrichment	CRB (coarse root biomass)	Pinus ponderosa	ECM	54.31	10.5319	67.83	19.2302	5	5
724	Walker et al, 1998	CO2 enrichment	CRB (coarse root biomass)	Pinus ponderosa	ECM	54.31	10.5319	66.69	24.7533	5	5
725	Vose et al, 1995	CO2 enrichment	CRB (coarse root biomass)	Pinus ponderosa	ECM	72.5	21.131	106.5	43.9941	3	3
726	Vose et al, 1995	CO2 enrichment	CRB (coarse root biomass)	Pinus ponderosa	ECM	72.5	21.131	150.7	46.9386	3	3
727	Janssens et al, 2005	CO2 enrichment	CRB (coarse root biomass)	Pinus sylvestris	ECM	89	24	170	70	4	4
728	Smith et al, 2013	CO2 enrichment	CRB (coarse root biomass)	Fagus sylvatica	AM	271.186	80.7326	161.017	73.3922	3	3
729	Jackson et al, 2009	CO2 enrichment	CRB (coarse root biomass)	Pinus taeda	ECM	295.146	53.8113	691.262	201.792	3	3
730	Smith et al, 2013	CO2 enrichment	CRB (coarse root biomass)	Betula pendula	ECM	342.857	123.719	332.143	204.134	3	3
731	Dawes et al, 2015	CO2 enrichment	CRB (coarse root biomass)	Pinus uncinate	ECM	1296.7	147.446	1252.75	343.997	5	5
732	Dawes et al, 2015	CO2 enrichment	CRB (coarse root biomass)	Larix decidua	ECM	1956.04	344.019	1802.2	540.592	5	5
733	Liu et al, 2004	CO2 enrichment	FRB (fine root biomass)	Fagus sylvatica	AM	4.43	0.03	4.42	0.001	6	6
734	Vanhatalo et al, 2003	CO2 enrichment	FRB (fine root biomass)	Betula pubescens	ECM	3.44	1.32	4.18	0.1	6	6
735	Calfapietra et al, 2007	CO2 enrichment	FRB (fine root biomass)	Populus euramericana	ECM	0.88	0.440908	0.8	0.293939	6	6
736	Calfapietra et al, 2007	CO2 enrichment	FRB (fine root biomass)	Populus alba	ECM	0.99	0.244949	0.9	0.293939	6	6
737	Calfapietra et al, 2007	CO2 enrichment	FRB (fine root biomass)	Populus nigra	AM	1.2	0.685857	0.72	0.342929	6	6
738	Vanhatalo et al, 2003	CO2 enrichment	FRB (fine root biomass)	Betula pubescens	ECM	1.98	0.78	4.01	0.38	6	6
739	Vanhatalo et al, 2003	CO2 enrichment	FRB (fine root biomass)	Picea abies	ECM	4.54	2.29	8.62	0.83	6	6
740	Parsons et al, 2003	CO2 enrichment	FRB (fine root biomass)	Acer saccharum	AM	24.7	8.48528	27.5	0.848528	8	8
741	Godbold et al, 1997	CO2 enrichment	FRB (fine root biomass)	Pinus strobus	ECM	2.1	0.67082	3.3	1.11803	5	5
742	Vanhatalo et al, 2003	CO2 enrichment	FRB (fine root biomass)	Picea abies	ECM	3.63	0.31	4.51	1.14	6	6
743	Wang et al, 2001	CO2 enrichment	FRB (fine root biomass)	Populus tremuloides	AM	4.3	0.9	6.5	1.42	4	4
744	Godbold et al, 1997	CO2 enrichment	FRB (fine root biomass)	Tsuga canadensis	ECM	2.5	0.67082	3.9	1.56525	5	5
745	Duan et al, 2015	CO2 enrichment	FRB (fine root biomass)	Abies faxoniana	ECM	46.7114	1.6108	46.7114	1.6108	4	4
746	Godbold et al, 1997	CO2 enrichment	FRB (fine root biomass)	Betula papyrifera	ECM	6.5	1.34164	8.4	1.78885	5	5
747	Lversen et al, 2012	CO2 enrichment	FRB (fine root biomass)	Liquidambar styraciflua	AM	17	18	13	2	4	4
748	Vanhatalo et al, 2003	CO2 enrichment	FRB (fine root biomass)	Picea abies	ECM	5.49	2.2	6.23	2.34	6	6
749	Hollinger et al, 1987	CO2 enrichment	FRB (fine root biomass)	Pseudotsuga menziesii	ECM	13.7335	3.1999	14.9087	2.4	3	3
750	Walker et al, 1998	CO2 enrichment	FRB (fine root biomass)	Pinus ponderosa	ECM	6.59	2.54912	6.21	2.5044	5	5
751	Vanhatalo et al, 2003	CO2 enrichment	FRB (fine root biomass)	Pinus sylvestris	ECM	4.92	4.02	7.87	2.56	6	6
752	Lawson et al, 2017	CO2 enrichment	FRB (fine root biomass)	Eucalyptus camaldulensis	ECM	2.64	5.20431	1.73	2.63044	8	8
753	Wang et al, 2001	CO2 enrichment	FRB (fine root biomass)	Populus tremuloides	AM	5.1	1.3	8.6	2.68	4	4
754	Vose et al, 1995	CO2 enrichment	FRB (fine root biomass)	Pinus ponderosa	ECM	6.4	3.4641	7.1	2.77128	3	3
755	Vose et al, 1995	CO2 enrichment	FRB (fine root biomass)	Pinus ponderosa	ECM	6.4	3.4641	8.7	2.77128	3	3
756	Vogel et al, 1997	CO2 enrichment	FRB (fine root biomass)	Alnus glutinosa	ECM	4.8	1.69941	6.1	2.83981	5	5
757	Lawson et al, 2017	CO2 enrichment	FRB (fine root biomass)	Acacia floribunda	AM	2.12	4.24264	2.27	3.02642	8	8
758	Walker et al, 1998	CO2 enrichment	FRB (fine root biomass)	Pinus ponderosa	ECM	6.59	2.54912	6.33	3.08577	5	5
759	Hollinger et al, 1987	CO2 enrichment	FRB (fine root biomass)	Pinus rudiata	ECM	15.8726	3.6	15.0212	3.2	3	3
760	King et al, 2005	CO2 enrichment	FRB (fine root biomass)	Populus tremuloides	AM	70.4961	9.9217	123.76	3.655	3	3
761	Hollinger et al, 1987	CO2 enrichment	FRB (fine root biomass)	Nothofagus fusca	ECM	23.5699	4.0403	24.757	4.0403	3	3
762	Vanhatalo et al, 2003	CO2 enrichment	FRB (fine root biomass)	Pinus sylvestris	ECM	5.78	3.08	11.11	4.23	6	6
763	Parsons et al, 2003	CO2 enrichment	FRB (fine root biomass)	Betula papyrifera	ECM	18	6.22254	29.2	4.52548	8	8
764	Lawson et al, 2017	CO2 enrichment	FRB (fine root biomass)	Casuarina cunninghamiana	AM	1.66	3.47897	4.11	5.54372	8	8
765	Vanhatalo et al, 2003	CO2 enrichment	FRB (fine root biomass)	Picea abies	ECM	4.56	1.71	8.08	6.68	6	6
766	Lversen et al, 2012	CO2 enrichment	FRB (fine root biomass)	Liquidambar styraciflua	AM	31	8	44	8	4	4
767	King et al, 2005	CO2 enrichment	FRB (fine root biomass)	Populus tremuloides	AM	84.5953	8.8773	70.4961	12.5326	3	3
768	Berntson et al, 1997	CO2 enrichment	FRB (fine root biomass)	Betula papyrifera	ECM	31.8	7.2	33.3	13.4	4	4
769	Jackson et al, 2009	CO2 enrichment	FRB (fine root biomass)	Pinus taeda	ECM	232.411	28.7534	300.198	16.7728	3	3
770	Berntson et al, 1997	CO2 enrichment	FRB (fine root biomass)	Betula alleghaniensis	ECM	13	9.4	46.3	17.8	4	4
771	King et al, 2005	CO2 enrichment	FRB (fine root biomass)	Acer saccharum	AM	123.238	26.631	143.081	20.365	3	3
772	Verburg et al, 2004	CO2 enrichment	FRB (fine root biomass)	Pinus jeffreyi	ECM	34.7027	11.027	39.2432	22.7028	4	4
773	King et al, 2005	CO2 enrichment	FRB (fine root biomass)	Acer saccharum	AM	103.394	8.355	142.559	24.543	3	3
774	Janssens et al, 2005	CO2 enrichment	FRB (fine root biomass)	Pinus sylvestris	ECM	33	8	63	26	4	4
775	Lversen et al, 2012	CO2 enrichment	FRB (fine root biomass)	Liquidambar styraciflua	AM	480	60	646	28	4	4
776	Lversen et al, 2012	CO2 enrichment	FRB (fine root biomass)	Liquidambar styraciflua	AM	12	4	26	30	4	4
777	Friend et al, 2000	CO2 enrichment	FRB (fine root biomass)	Pinus taeda	ECM	120	44	90	36	4	4
778	Temperton al, 2003	CO2 enrichment	FRB (fine root biomass)	Picea abies	ECM	265.2	107.935	343.3	37.0516	5	5
779	Lagomarsino et al, 2013	CO2 enrichment	FRB (fine root biomass)	Populus	AM	196	26.2694	243.833	38.3938	3	3
780	Dawes et al, 2015	CO2 enrichment	FRB (fine root biomass)	Pinus uncinate	ECM	945.055	98.2886	901.099	49.1443	5	5
781	Dawes et al, 2015	CO2 enrichment	FRB (fine root biomass)	Larix decidua	ECM	1164.84	98.2752	967.033	49.1443	5	5
782	Friend et al, 2000	CO2 enrichment	FRB (fine root biomass)	Liquidambar styraciflua	AM	131	30	174	52	4	4
783	Friend et al, 2000	CO2 enrichment	FRB (fine root biomass)	Liquidambar styraciflua	AM	268	54	287	58	4	4
784	Drake et al, 2012	CO2 enrichment	FRB (fine root biomass)	Pinus taeda	ECM	166.124	76.1651	156.352	77.5756	3	3
785	Friend et al, 2000	CO2 enrichment	FRB (fine root biomass)	Pinus taeda	ECM	272	60	350	82	4	4
786	Lversen et al, 2012	CO2 enrichment	FRB (fine root biomass)	Liquidambar styraciflua	AM	83	14	159	92	4	4
787	Lversen et al, 2012	CO2 enrichment	FRB (fine root biomass)	Liquidambar styraciflua	AM	212	60	381	302	4	4
788	Calfapietra et al, 2007	CO2 enrichment	LM (litter mass)	Populus alba	ECM	1.46	0.0489898	1.26	0.0244949	6	6
789	Calfapietra et al, 2007	CO2 enrichment	LM (litter mass)	Populus nigra	AM	1.75	0.0489898	1.46	0.0734847	6	6
790	Calfapietra et al, 2007	CO2 enrichment	LM (litter mass)	Populus euramericana	ECM	1.86	0.0979796	1.58	0.146969	6	6
791	Elkohen et al, 1992	CO2 enrichment	LM (litter mass)	Castanea sativa	ECM	11.6168	0.550959	14.3913	0.550959	6	6
792	Elkohen et al, 1992	CO2 enrichment	LM (litter mass)	Castanea sativa	ECM	11.6168	0.550959	30.9596	7.16247	6	6
793	Park et al, 2020	CO2 enrichment	LM (litter mass)	Quercus variabilis	ECM	271.942	97.1958	306.475	14.9528	3	3
794	Lagomarsino et al, 2013	CO2 enrichment	LM (litter mass)	Populus	AM	875.829	88.6547	1012.32	118.206	3	3
795	Lagomarsino et al, 2013	CO2 enrichment	LM (litter mass)	Populus	AM	545.972	68.9537	534.597	137.907	3	3
796	Park et al, 2020	CO2 enrichment	LM (litter mass)	Pinus densiflora	ECM	487.77	112.147	634.532	171.96	3	3
797	Jia et al, 2020	CO2 enrichment	SOCS (soil organic carbon stocks)	Robinia pseudoacacia	ECM	1.41	0.06	1.08	0.03	9	9
798	Janus et al, 2005	CO2 enrichment	SOCS (soil organic carbon stocks)	Populus tremuloides	AM	2.9	0.173205	3.1	0.173205	3	3
799	Janus et al, 2005	CO2 enrichment	SOCS (soil organic carbon stocks)	Populus tremuloides	AM	2.9	0.173205	2.9	0.173205	3	3
800	Huang et al, 2020	CO2 enrichment	SOCS (soil organic carbon stocks)	Robinia pseudoacacia	ECM	12.3429	1.5426	12.5486	0.3084	9	9
801	Huang et al, 2020	CO2 enrichment	SOCS (soil organic carbon stocks)	Robinia pseudoacacia	ECM	12.3429	1.5426	13.0629	0.3084	9	9
802	Iversen et al, 2011	CO2 enrichment	SOCS (soil organic carbon stocks)	Liquidambar styraciflua	AM	8.7	0.5	10.1	0.5	3	3
803	Lversen et al, 2012	CO2 enrichment	SOCS (soil organic carbon stocks)	Liquidambar styraciflua	AM	11.3	0.8	14.4	0.6	4	4
804	Lversen et al, 2012	CO2 enrichment	SOCS (soil organic carbon stocks)	Liquidambar styraciflua	AM	18.3	1	20.1	0.6	4	4
805	Iversen et al, 2011	CO2 enrichment	SOCS (soil organic carbon stocks)	Liquidambar styraciflua	AM	20	1.5	21.4	0.6	3	3
806	Iversen et al, 2011	CO2 enrichment	SOCS (soil organic carbon stocks)	Liquidambar styraciflua	AM	2.3	0.3	2.6	1	3	3
807	Lversen et al, 2012	CO2 enrichment	SOCS (soil organic carbon stocks)	Liquidambar styraciflua	AM	2.8	0.8	3.2	1.6	4	4
808	Iversen et al, 2011	CO2 enrichment	SOCS (soil organic carbon stocks)	Liquidambar styraciflua	AM	4.1	0.4	4.9	1.6	3	3
809	Ross et al, 2006	CO2 enrichment	SOCS (soil organic carbon stocks)	Pinus radiata	ECM	4.08163	1.7674	5.35714	2.65111	3	3
810	Lversen et al, 2012	CO2 enrichment	SOCS (soil organic carbon stocks)	Liquidambar styraciflua	AM	3.4	1	4.2	3.8	4	4
811	Sun et al, 2018	CO2 enrichment	SOCS (soil organic carbon stocks)	Quercus mongolica	ECM	28.9	2.42487	29.1	4.67654	3	3
812	Lversen et al, 2012	CO2 enrichment	SOCS (soil organic carbon stocks)	Liquidambar styraciflua	AM	5.7	1.4	7	5	4	4
813	Li et al, 2010	CO2 enrichment	SOCS (soil organic carbon stocks)	Quercus mongolica	ECM	81.1	5.71577	79.9	5.19615	3	3
814	Zhang et al, 2016	CO2 enrichment	SOCS (soil organic carbon stocks)	Pinus koraiensis	ECM	68.22	5.94	69.53	5.87	3	3
815	Lversen et al, 2012	CO2 enrichment	SOCS (soil organic carbon stocks)	Liquidambar styraciflua	AM	30.8	2	36.8	7.4	4	4
816	Ross et al, 2006	CO2 enrichment	SOCS (soil organic carbon stocks)	Nothofagus fusca	ECM	23.9796	3.53477	33.9286	18.9996	3	3
817	Lichter et al, 2008	CO2 enrichment	SOCS (soil organic carbon stocks)	Pinus taeda	ECM	211.63	40.09	365.46	27.38	3	3
818	Lichter et al, 2008	CO2 enrichment	SOCS (soil organic carbon stocks)	Pinus taeda	ECM	391.72	50.89	457.46	33.2	3	3
819	Lichter et al, 2008	CO2 enrichment	SOCS (soil organic carbon stocks)	Pinus taeda	ECM	1102.96	19.35	1188.44	55.9	3	3
820	Lichter et al, 2008	CO2 enrichment	SOCS (soil organic carbon stocks)	Pinus taeda	ECM	514.73	11.41	587.6	74.45	3	3
821	Hoosbeek et al, 2011	CO2 enrichment	SOCS (soil organic carbon stocks)	Betula pendula	ECM	740	248	941	82	4	4
822	Lichter et al, 2008	CO2 enrichment	SOCS (soil organic carbon stocks)	Pinus taeda	ECM	875.67	124.72	875.26	125.85	3	3
823	Hoosbeek et al, 2016	CO2 enrichment	SOCS (soil organic carbon stocks)	Alnus glutinosa	ECM	3355.8	141.2	3142.9	133.4	4	4
824	Jr et al, 2013	CO2 enrichment	SOCS (soil organic carbon stocks)	Pinus taeda	ECM	1977	31.1769	2142	162.813	3	3
825	Jr et al, 2013	CO2 enrichment	SOCS (soil organic carbon stocks)	Pinus taeda	ECM	2407	244.219	2734	166.277	3	3
826	Jr et al, 2013	CO2 enrichment	SOCS (soil organic carbon stocks)	Pinus taeda	ECM	1901	90.0666	2208	235.559	3	3
827	Hoosbeek et al, 2011	CO2 enrichment	SOCS (soil organic carbon stocks)	Fagus sylvatica	AM	727	244	761	240	4	4
828	Hoosbeek et al, 2011	CO2 enrichment	SOCS (soil organic carbon stocks)	Alnus glutinosa	ECM	788	346	993	398	4	4
829	Hoosbeek et al, 2016	CO2 enrichment	SOCS (soil organic carbon stocks)	Betula pendula	ECM	3066	787.2	3122.5	522.8	4	4
830	Lichter et al, 2008	CO2 enrichment	SOCS (soil organic carbon stocks)	Pinus taeda	ECM	3917.8	257.69	4323.73	719.26	3	3
831	Hoosbeek et al, 2016	CO2 enrichment	SOCS (soil organic carbon stocks)	Fagus sylvatica	AM	3687.5	299.6	3474.5	952.8	4	4
832	Duan et al, 2015	CO2 enrichment	SOCS (soil organic carbon stocks)	Abies faxoniana	ECM	54444.4	4938.4	46543.2	2963	4	4
833	Park et al, 2020	CO2 enrichment	MBC (microbial biomass carbon)	Quercus variabilis	ECM	261.682	20.2338	343.458	8.09387	3	3
834	Ross et al, 2006	CO2 enrichment	MBC (microbial biomass carbon)	Pinus radiata	ECM	96.9388	8.83727	181.122	8.83692	3	3
835	Lagomarsino et al, 2006	CO2 enrichment	MBC (microbial biomass carbon)	Populus alba	ECM	189.873	20.8861	169.937	13.2911	3	3
836	Huang et al, 2020	CO2 enrichment	MBC (microbial biomass carbon)	Robinia pseudoacacia	ECM	282.857	8.571	357.143	17.142	9	9
837	Huang et al, 2020	CO2 enrichment	MBC (microbial biomass carbon)	Robinia pseudoacacia	ECM	282.857	8.571	362.857	17.142	9	9
838	Duan et al, 2015	CO2 enrichment	MBC (microbial biomass carbon)	Abies faxoniana	ECM	203.158	6.316	205.263	25.264	4	4
839	Park et al, 2020	CO2 enrichment	MBC (microbial biomass carbon)	Pinus densiflora	ECM	196.262	32.3738	175.234	28.3277	3	3
840	Lagomarsino et al, 2006	CO2 enrichment	MBC (microbial biomass carbon)	Populus alba	ECM	151.899	28.481	207.911	37.0253	3	3
841	Li et al, 2010	CO2 enrichment	MBC (microbial biomass carbon)	Quercus mongolica	ECM	481.8	22.6899	680.5	40.3568	3	3
842	Zhang et al, 2016	CO2 enrichment	MBC (microbial biomass carbon)	Pinus koraiensis	ECM	585	58	513	64	3	3
843	Ross et al, 2006	CO2 enrichment	MBC (microbial biomass carbon)	Nothofagus fusca	ECM	341.837	123.717	375	185.577	3	3
844	Jackson et al, 2009	CO2 enrichment	SR (soil respiration)	Pinus taeda	ECM	0.172619	0.00859152	0.217262	0.0206197	3	3
845	Niinisto et al, 2004	CO2 enrichment	SR (soil respiration)	Pinus sylvestris	ECM	0.128838	0.0205774	0.170179	0.0514436	3	3
846	Niinisto et al, 2004	CO2 enrichment	SR (soil respiration)	Pinus sylvestris	ECM	0.133333	0.0308662	0.180574	0.0617323	3	3
847	Niinisto et al, 2004	CO2 enrichment	SR (soil respiration)	Pinus sylvestris	ECM	0.161509	0.0205774	0.22661	0.0617323	3	3
848	Niinisto et al, 2004	CO2 enrichment	SR (soil respiration)	Pinus sylvestris	ECM	0.183785	0.0411549	0.272647	0.0617323	3	3
849	Liu et al, 2007	CO2 enrichment	SR (soil respiration)	Pinus sylvestris	ECM	1.65517	0.0574713	1.55172	0.0804598	3	3
850	Ross et al, 2006	CO2 enrichment	SR (soil respiration)	Pinus radiata	ECM	0.324873	0.105506	0.629442	0.0879206	3	3
851	Liu et al, 2007	CO2 enrichment	SR (soil respiration)	Pinus sylvestris	ECM	1.65517	0.0574713	1.71264	0.103448	3	3
852	Lagomarsino et al, 2013	CO2 enrichment	SR (soil respiration)	Populus	AM	0.690265	0.0919673	1.27434	0.183935	3	3
853	Lagomarsino et al, 2006	CO2 enrichment	SR (soil respiration)	Populus alba	ECM	1.14	0.2	1.16	0.2	3	3
854	Janssens et al, 1998	CO2 enrichment	SR (soil respiration)	Pinus sylvestris	ECM	3.67883	0.36488	5.36107	0.202711	3	3
855	Liu et al, 2007	CO2 enrichment	SR (soil respiration)	Pinus sylvestris	ECM	3.26857	0.388571	3.2	0.388571	3	3
856	Liu et al, 2016	CO2 enrichment	SR (soil respiration)	Pinus tabulaeformis	ECM	3.15695	0.89686	1.50673	0.39462	3	3
857	Lagomarsino et al, 2006	CO2 enrichment	SR (soil respiration)	Populus alba	ECM	4	0.9	2.21	0.4	3	3
858	Liu et al, 2016	CO2 enrichment	SR (soil respiration)	Pinus tabulaeformis	ECM	3.3722	0.43049	2.76233	0.4305	3	3
859	Liu et al, 2007	CO2 enrichment	SR (soil respiration)	Pinus sylvestris	ECM	3.26857	0.388571	2.83429	0.457143	3	3
860	Ross et al, 2006	CO2 enrichment	SR (soil respiration)	Nothofagus fusca	ECM	1.16751	0.562709	1.44162	0.47479	3	3
861	Vose et al, 1997	CO2 enrichment	SR (soil respiration)	Pinus ponderosa	ECM	2.39362	0.478723	2.87234	0.478723	3	3
862	Vose et al, 1995	CO2 enrichment	SR (soil respiration)	Pinus ponderosa	ECM	1.704	0.630466	1.628	0.514419	3	3
863	Barron et al, 2005	CO2 enrichment	SR (soil respiration)	Populus deltoides	ECM	3.56436	0.480173	5.06931	0.548769	3	3
864	Vose et al, 1995	CO2 enrichment	SR (soil respiration)	Pinus ponderosa	ECM	1.704	0.630466	2.383	0.630466	3	3
865	Vose et al, 1997	CO2 enrichment	SR (soil respiration)	Pinus ponderosa	ECM	2.71277	0.638298	2.23404	0.638298	3	3
866	Vose et al, 1997	CO2 enrichment	SR (soil respiration)	Pinus ponderosa	ECM	2.39362	0.478723	2.87234	0.797872	3	3
867	Lagomarsino et al, 2013	CO2 enrichment	SR (soil respiration)	Populus	AM	3.21239	0.50582	4.77876	0.827706	3	3
868	Barron et al, 2005	CO2 enrichment	SR (soil respiration)	Populus deltoides	ECM	3.56436	0.480173	6.09901	1.44052	3	3
869	Vose et al, 1997	CO2 enrichment	SR (soil respiration)	Pinus ponderosa	ECM	4.94681	0.638298	5.58511	1.75532	3	3
870	Vose et al, 1995	CO2 enrichment	SR (soil respiration)	Pinus ponderosa	ECM	3.733	1.81692	6.12	1.81692	3	3
871	Vose et al, 1995	CO2 enrichment	SR (soil respiration)	Pinus ponderosa	ECM	1.602	2.13215	4.595	2.13215	3	3
872	Vose et al, 1995	CO2 enrichment	SR (soil respiration)	Pinus ponderosa	ECM	3.733	1.81692	12.194	2.22569	3	3
873	Vose et al, 1997	CO2 enrichment	SR (soil respiration)	Pinus ponderosa	ECM	2.71277	0.638298	5.58511	2.23404	3	3
874	Vose et al, 1995	CO2 enrichment	SR (soil respiration)	Pinus ponderosa	ECM	1.602	2.13215	3.692	2.46124	3	3
875	Drake et al, 2012	CO2 enrichment	SR (soil respiration)	Pinus taeda	ECM	130.424	30.4536	128.263	8.88231	3	3
876	Comstedt et al, 2006	CO2 enrichment	SR (soil respiration)	Picea abies	ECM	267	82	392	16	3	3
877	Comstedt et al, 2006	CO2 enrichment	SR (soil respiration)	Picea abies	ECM	200	25	315	24	3	3
878	Comstedt et al, 2006	CO2 enrichment	SR (soil respiration)	Picea abies	ECM	467	107	706	34	3	3
879	Pregitzer et al, 2008	CO2 enrichment	SR (soil respiration)	Populus tremuloides	AM	783.471	68.7095	902.479	51.5321	3	3
880	Pregitzer et al, 2008	CO2 enrichment	SR (soil respiration)	Populus tremuloides	AM	496.124	40.2803	635.659	67.1338	3	3
881	Pregitzer et al, 2008	CO2 enrichment	SR (soil respiration)	Populus tremuloides	AM	637.795	95.4674	732.283	68.191	3	3
882	Zhou et al, 2010	CO2 enrichment	SR (soil respiration)	Quercus mongolica	ECM	248.4	83.2	306	104.4	4	4
883	Drake et al, 2018	CO2 enrichment	SR (soil respiration)	Eucalyptus tereticornis	ECM	1033.16	145.821	1125	125.92	3	3
884	Drake et al, 2018	CO2 enrichment	SR (soil respiration)	Eucalyptus tereticornis	ECM	1220.66	172.322	1316.33	145.804	3	3
885	Drake et al, 2018	CO2 enrichment	SR (soil respiration)	Eucalyptus tereticornis	ECM	1197.7	212.09	1285.71	172.322	3	3

## Sheet: Supplementary Data 1c
Database 1: The database of carbon-related variables under warming effects
No	Reference	Treatment	Variables	Tree species	Mycorrhizal fungi type	Mean in Control	Standard deviation in Control	Mean in treatment group	Standard deviation in treatment group	Replicates in Control	Replicates in treatment group
1	Han et al, 2015	warming	TB (total biomass)	Pinus koraiensis	ECM	0.77	0.0519615	0.72	0.0519615	3	3
2	Han et al, 2015	warming	TB (total biomass)	Pinus densiflra	ECM	1.05	0.069282	1.12	0.0519615	3	3
3	Dong et al, 2012	warming	TB (total biomass)	Quercus mongolica	ECM	0.957105	0.187915	0.494404	0.067113	6	6
4	Dusenge et al, 2020	warming	TB (total biomass)	Picea mariana	ECM	0.892857	0.338816	0.357143	0.112938	10	10
5	Noh et al, 2016	warming	TB (total biomass)	Pinus densiflora	ECM	2.19	0.15	2.32	0.12	4	4
6	Pumpanen et al, 2012	warming	TB (total biomass)	Pinus sylvestris	ECM	0.6	0.12	0.93	0.13	5	5
7	Zhao et al, 2009	warming	TB (total biomass)	Picea asperata	ECM	5.71429	0.33612	6.80672	0.16808	4	4
8	Pumpanen et al, 2012	warming	TB (total biomass)	Pinus sylvestris	ECM	0.6	0.12	0.65	0.2	5	5
9	Dusenge et al, 2020	warming	TB (total biomass)	Picea mariana	ECM	0.892857	0.338816	0.607143	0.225875	10	10
10	Dusenge et al, 2020	warming	TB (total biomass)	Larix laricina	ECM	0.214286	0.112938	0.142857	0.225878	10	10
11	Dong et al, 2012	warming	TB (total biomass)	Quercus mongolica	ECM	0.957105	0.187915	1.48892	0.22819	6	6
12	Wayne et al, 1998	warming	TB (total biomass)	Betula alleghaniensis	ECM	4.05797	0.45184	1.10145	0.251026	3	3
13	Chen et al, 2021	warming	TB (total biomass)	Populus cathayana	AM	2.77333	0.130656	2.93333	0.261287	6	6
14	Ambebe et al, 2009	warming	TB (total biomass)	Betula papyrifera	ECM	4.61255	0.27675	4.24354	0.27676	4	4
15	Zhao et al, 2009	warming	TB (total biomass)	Pinus tabulaeformis	ECM	10	0.6722	14.6218	0.3362	4	4
16	Han et al, 2015	warming	TB (total biomass)	Abies koreana	ECM	1.87	0.155885	2.01	0.34641	3	3
17	Krause et al, 2013	warming	TB (total biomass)	Ficus insipida	AM	1.17	0.25	3.8	0.36	3	3
18	Yang et al, 2013	warming	TB (total biomass)	Abies fabri	ECM	4.36	1.47224	3	0.363731	3	3
19	Pumpanen et al, 2012	warming	TB (total biomass)	Betula pendula Roth	ECM	3.31	0.84	3.23	0.37	5	5
20	Chen et al, 2021	warming	TB (total biomass)	Populus cathayana	AM	2.98667	0.261263	5.28	0.52255	6	6
21	Han et al, 2015	warming	TB (total biomass)	Abies holophylla	ECM	2.5	0.225167	3.52	0.536936	3	3
22	Pumpanen et al, 2012	warming	TB (total biomass)	Picea abies	ECM	2.36	0.41	3.44	0.57	5	5
23	Pumpanen et al, 2012	warming	TB (total biomass)	Betula pendula Roth	ECM	3.31	0.84	3.85	0.68	5	5
24	Fondo et al, 2010	warming	TB (total biomass)	Betula papyrifera	ECM	6.12245	0.408163	14.6939	0.680272	3	3
25	Zhao et al, 2012	warming	TB (total biomass)	Pinus tabulaeformis	ECM	10.0641	0.833333	14.5513	0.705128	4	4
26	Yu et al, 2019	warming	TB (total biomass)	Abies faxoniana	ECM	19.9257	1.16231	26.3366	0.775021	5	5
27	Pumpanen et al, 2012	warming	TB (total biomass)	Picea abies	ECM	2.36	0.41	2.91	0.79	5	5
28	Dusenge et al, 2020	warming	TB (total biomass)	Larix laricina	ECM	0.214286	0.112938	1.10714	0.790569	10	10
29	Fondo et al, 2010	warming	TB (total biomass)	Betula papyrifera	ECM	6.12245	0.408163	12.517	0.952381	3	3
30	Ambebe et al, 2013	warming	TB (total biomass)	Betula papyrifera	ECM	20.0957	1.4354	15.7895	1.1483	3	3
31	Yu et al, 2020	warming	TB (total biomass)	Picea purpurea	ECM	22.5248	1.5496	26.8564	1.16231	5	5
32	Ambebe et al, 2013	warming	TB (total biomass)	Betula papyrifera	ECM	19.378	1.2919	17.799	1.4354	3	3
33	Bassow et al, 1994	warming	TB (total biomass)	Acer pensylvanicum	AM	6.20663	1.09098	7.97721	1.63648	3	3
34	Danyagri et al, 2014	warming	TB (total biomass)	Acer spicatum	AM	10.4545	4.3124	13.9773	1.79681	10	10
35	Ambebe et al, 2013	warming	TB (total biomass)	Betula papyrifera	ECM	16.0766	1.5789	15.6459	1.8661	3	3
36	Bassow et al, 1994	warming	TB (total biomass)	Betula populifolia	ECM	6.89173	1.51201	7.80374	2.06183	3	3
37	Bassow et al, 1994	warming	TB (total biomass)	Betula alleghaniensis	ECM	5.78042	1.78704	7.08932	2.06195	3	3
38	Noh et al, 2016	warming	TB (total biomass)	Quercus variabilis	ECM	7.35	1.72	8.86	2.65	4	4
39	Uselman et al, 2001	warming	TB (total biomass)	Robinia pseudoacacia	ECM	7.38789	3.44128	16.2758	4.81779	3	3
40	Way et al, 2013	warming	TB (total biomass)	Populus tremuloides	AM	13.5057	4.31367	23.8506	5.64077	3	3
41	Lewis et al, 2013	warming	TB (total biomass)	Eucalyptus sideroxylon	ECM	12.5	2.68328	13.6	6.03738	5	5
42	Lewis et al, 2013	warming	TB (total biomass)	Eucalyptus saligna	ECM	25.8	7.60263	27.8	6.26099	5	5
43	Hou et al, 2011	warming	TB (total biomass)	Abies faxoniana	ECM	35.89	3.79671	36.9	8.10781	6	6
44	Duanb et al, 2015	warming	TB (total biomass)	Callitris rhomboidea	AM	52.9644	6.16142	47.8261	8.8998	3	3
45	Baumeraerts et al, 2013	warming	TB (total biomass)	Quercus rubra	ECM	60.218	11.7987	42.5068	9.43898	3	3
46	Duanb et al, 2015	warming	TB (total biomass)	Pinus radiata	ECM	45.4545	6.8461	49.0119	9.58448	3	3
47	Baumeraerts et al, 2013	warming	TB (total biomass)	Quercus rubra	ECM	60.218	11.7987	57.7657	11.3267	3	3
48	Duan et al, 2018	warming	TB (total biomass)	Callitris rhomboidea	AM	51.24	9.76877	46.2	11.9338	3	3
49	Duan et al, 2018	warming	TB (total biomass)	Pinus radiata	ECM	43.52	5.404	47.35	12.7652	3	3
50	Baumeraerts et al, 2013	warming	TB (total biomass)	Quercus rubra	ECM	60.218	11.7987	71.1172	13.6865	3	3
51	Yang et al, 2010	warming	TB (total biomass)	Abies faxoniana	ECM	330.65	21.87	410.14	13.83	3	3
52	Wang et al, 2012	warming	TB (total biomass)	Abies faxoniana	ECM	339.98	28.0073	415.47	14.0123	3	3
53	Xu et al, 2021	warming	TB (total biomass)	Ginkgo biloba	AM	97.7	8.1406	132.9	16.1081	3	3
54	Dai et al, 2021	warming	TB (total biomass)	Populus tremula	AM	262.667	45.7222	241.333	19.5959	6	6
55	Kurepin et al, 2018	warming	TB (total biomass)	Picea abies	ECM	47.0588	21.7021	56.8627	21.7021	10	10
56	Xu et al, 2021	warming	TB (total biomass)	Populus alba	ECM	231.7	2.9445	310.9	25.4611	3	3
57	Kurepin et al, 2018	warming	TB (total biomass)	Picea abies	ECM	47.0588	21.7021	67.6471	27.9024	10	10
58	Lib et al, 2017	warming	TB (total biomass)	Machilus breviflora	AM	59.3407	34.2603	89.011	34.26	3	3
59	Lib et al, 2017	warming	TB (total biomass)	Syzygium rehderianum	AM	276.923	85.6516	286.813	34.26	3	3
60	Pu et al, 2017	warming	TB (total biomass)	Abies faxoniana	ECM	68.5	39	130.8	34.8	4	4
61	Kurepin et al, 2018	warming	TB (total biomass)	Pinus sylvestris	ECM	83.3333	49.6044	131.373	65.105	10	10
62	Lib et al, 2017	warming	TB (total biomass)	Pinus massoniana	ECM	237.363	102.78	731.868	102.782	3	3
63	Kurepin et al, 2018	warming	TB (total biomass)	Pinus sylvestris	ECM	83.3333	49.6044	109.804	117.811	10	10
64	Lib et al, 2017	warming	TB (total biomass)	Schima superba	AM	504.396	171.302	1038.46	274.08	3	3
65	Lib et al, 2017	warming	TB (total biomass)	Castanopsis hystrix	ECM	1018.68	531.029	1157.14	719.477	3	3
66	Dawes et al, 2015	warming	TB (total biomass)	Larix decidua	ECM	6853.33	1311.83	6880	1311.83	5	5
67	Dawes et al, 2015	warming	TB (total biomass)	Pinus uncinate	ECM	5200	894.427	7306.67	1431.08	5	5
68	Dong et al, 2012	warming	AGB (aboveground biomass)	Quercus mongolica	ECM	0.601647	0.099055	0.234291	0.014151	6	6
69	Han et al, 2015	warming	AGB (aboveground biomass)	Pinus koraiensis	ECM	0.72	0.06	0.68	0.06	3	3
70	Han et al, 2015	warming	AGB (aboveground biomass)	Pinus densiflra	ECM	0.81	0.12	0.88	0.06	3	3
71	Pumpanen et al, 2012	warming	AGB (aboveground biomass)	Pinus sylvestris	ECM	0.32	0.04	0.42	0.07	5	5
72	Noh et al, 2016	warming	AGB (aboveground biomass)	Pinus densiflora	ECM	1.29	0.08	1.2	0.08	4	4
73	Dong et al, 2012	warming	AGB (aboveground biomass)	Quercus mongolica	ECM	0.601647	0.099055	0.436837	0.080187	6	6
74	Pumpanen et al, 2012	warming	AGB (aboveground biomass)	Pinus sylvestris	ECM	0.32	0.04	0.32	0.1	5	5
75	Han et al, 2015	warming	AGB (aboveground biomass)	Abies koreana	ECM	0.99	0.12	1.15	0.15	3	3
76	Pumpanen et al, 2012	warming	AGB (aboveground biomass)	Betula pendula Roth	ECM	1.34	0.33	1.02	0.15	5	5
77	Pumpanen et al, 2012	warming	AGB (aboveground biomass)	Picea abies	ECM	1.34	0.33	1.34	0.18	5	5
78	Pumpanen et al, 2012	warming	AGB (aboveground biomass)	Betula pendula Roth	ECM	1.44	0.36	1.81	0.18	5	5
79	Mcwhirter et al, 2015	warming	AGB (aboveground biomass)	Elaeagnus umbellata	AM	0.514242	0.23841	0.669391	0.357615	3	3
80	Pumpanen et al, 2012	warming	AGB (aboveground biomass)	Picea abies	ECM	1.44	0.36	1.7	0.5	5	5
81	Han et al, 2015	warming	AGB (aboveground biomass)	Abies holophylla	ECM	1.92	0.27	2.79	0.54	3	3
82	Mcwhirter et al, 2015	warming	AGB (aboveground biomass)	Malus coronaria	ECM	0.216204	0.357618	0.212462	0.596028	3	3
83	Ambebe et al, 2013	warming	AGB (aboveground biomass)	Betula papyrifera	ECM	14.2623	0.9836	11.1885	0.7377	3	3
84	Mcwhirter et al, 2015	warming	AGB (aboveground biomass)	Fraxinus americana	AM	0.861912	0.953634	0.77865	0.83445	3	3
85	Ambebe et al, 2013	warming	AGB (aboveground biomass)	Betula papyrifera	ECM	12.418	1.2295	13.0328	1.1065	3	3
86	Noh et al, 2016	warming	AGB (aboveground biomass)	Quercus variabilis	ECM	2.53	0.66	3.41	1.42	4	4
87	Ambebe et al, 2013	warming	AGB (aboveground biomass)	Betula papyrifera	ECM	10.9426	1.3525	11.3115	1.4754	3	3
88	Mcwhirter et al, 2015	warming	AGB (aboveground biomass)	Rhus typhina	ECM	1.63672	1.90728	1.7124	1.78809	3	3
89	ferrari et al, 2020	warming	AGB (aboveground biomass)	Pinus mugo	ECM	3.93578	9.24768	3.16514	2.64216	12	12
90	ferrari et al, 2021	warming	AGB (aboveground biomass)	Leucanthemopsis alpina	AM	4.2069	5.29656	4.73103	3.08968	8	8
91	ferrari et al, 2018	warming	AGB (aboveground biomass)	Leucanthemopsis alpina	AM	3.29655	1.10344	4.23448	3.3104	8	8
92	Rasheed et al, 2020	warming	AGB (aboveground biomass)	Pinus sylvestris	ECM	26.19	3.22	48.54	7.2	4	4
93	ferrari et al, 2019	warming	AGB (aboveground biomass)	Pinus mugo	ECM	3.57798	8.25696	3.7156	7.9266	12	12
94	Lewis et al, 2013	warming	AGB (aboveground biomass)	Eucalyptus sideroxylon	ECM	8.6	5.5	8.8	8	5	5
95	Lewis et al, 2013	warming	AGB (aboveground biomass)	Eucalyptus saligna	ECM	18.4	13	20.8	10.5	5	5
96	Xu et al, 2021	warming	AGB (aboveground biomass)	Ginkgo biloba	AM	45.7	7.5	62.8	21.3	3	3
97	Xu et al, 2021	warming	AGB (aboveground biomass)	Populus alba	ECM	117.1	20.4	155.6	32.1	3	3
98	Pu et al, 2017	warming	AGB (aboveground biomass)	Abies faxoniana	ECM	47	60.4	90.9	59.6	4	4
99	Dawes et al, 2015	warming	AGB (aboveground biomass)	Larix decidua	ECM	3866.67	1733.3	3813.33	1733.35	5	5
100	Dawes et al, 2015	warming	AGB (aboveground biomass)	Pinus uncinate	ECM	2613.33	1066.7	4106.67	2000	5	5
101	Cheesman et al, 2013	warming	RB (root biomass)	Adenanthera pavonina	AM	0.17	0.04	0.15	0.02	4	4
102	Bassow et al, 1994	warming	RB (root biomass)	Betula alleghaniensis	ECM	0.51	0.0242487	0.501	0.0225167	3	3
103	Bassow et al, 1994	warming	RB (root biomass)	Betula populifolia	ECM	0.733	0.034641	0.66	0.0311769	3	3
104	Han et al, 2015	warming	RB (root biomass)	Pinus koraiensis	ECM	0.62	0.034641	0.62	0.034641	3	3
105	Han et al, 2015	warming	RB (root biomass)	Pinus densiflra	ECM	0.65	0.0173205	0.62	0.034641	3	3
106	Wheeler et al, 2017	warming	RB (root biomass)	Acer rubrum	AM	0.0423077	0.00666164	0.200962	0.0366381	3	3
107	Cheesman et al, 2013	warming	RB (root biomass)	Adenanthera pavonina	AM	0.17	0.04	0.17	0.04	4	4
108	Noh et al, 2016	warming	RB (root biomass)	Pinus densiflora	ECM	1.03	0.09	1.12	0.05	4	4
109	Han et al, 2015	warming	RB (root biomass)	Abies koreana	ECM	0.06	0.034641	0.05	0.0519615	3	3
110	Cheesman et al, 2013	warming	RB (root biomass)	Lacistema aggregatum	ECM	0.61	0.0173205	0.7	0.0519615	3	3
111	Cheesman et al, 2013	warming	RB (root biomass)	Adenanthera pavonina	AM	0.17	0.04	0.18	0.06	4	4
112	Dong et al, 2012	warming	RB (root biomass)	Quercus mongolica	ECM	0.620513	0.094338	0.262586	0.066037	6	6
113	Cheesman et al, 2013	warming	RB (root biomass)	Theobroma cacao	AM	0.68	0.225167	0.56	0.069282	3	3
114	Pumpanen et al, 2012	warming	RB (root biomass)	Pinus sylvestris	ECM	0.29	0.08	0.51	0.07	5	5
115	Han et al, 2015	warming	RB (root biomass)	Abies holophylla	ECM	0.68	0.034641	0.72	0.0866025	3	3
116	Cheesman et al, 2013	warming	RB (root biomass)	Ormosia macrocalyx	AM	0.35	0.171464	0.14	0.0979796	6	6
117	Dong et al, 2012	warming	RB (root biomass)	Quercus mongolica	ECM	0.620513	0.094338	0.521737	0.113205	6	6
118	Mcwhirter et al, 2015	warming	RB (root biomass)	Elaeagnus umbellata	AM	0.181818	0.0787304	0.204545	0.118095	3	3
119	Pumpanen et al, 2012	warming	RB (root biomass)	Pinus sylvestris	ECM	0.29	0.08	0.33	0.12	5	5
120	Cheesman et al, 2013	warming	RB (root biomass)	Theobroma cacao	AM	0.68	0.225167	0.43	0.121244	3	3
121	Cheesman et al, 2013	warming	RB (root biomass)	Ficus insipida	AM	0.15	0.122474	0.31	0.122474	6	6
122	Cheesman et al, 2013	warming	RB (root biomass)	Garcina intermedia	AM	0.22	0.171464	0.12	0.122474	6	6
123	Ambebe et al, 2009	warming	RB (root biomass)	Betula papyrifera	ECM	1.6378	0.09448	1.76378	0.12598	4	4
124	Cheesman et al, 2013	warming	RB (root biomass)	Lacistema aggregatum	ECM	0.06	0.034641	0.19	0.138564	3	3
125	Cheesman et al, 2013	warming	RB (root biomass)	Garcina intermedia	AM	0.22	0.171464	0.26	0.146969	6	6
126	Krause et al, 2013	warming	RB (root biomass)	Ficus insipida	AM	0.3	0.11	0.86	0.15	3	3
127	Mcwhirter et al, 2015	warming	RB (root biomass)	Malus coronaria	ECM	0.136364	0.0787286	0.136364	0.157459	3	3
128	Cheesman et al, 2013	warming	RB (root biomass)	Garcina intermedia	AM	0.22	0.171464	0.21	0.171464	6	6
129	Chen et al, 2021	warming	RB (root biomass)	Citharexylum	ECM	0.49	0.367423	0.19	0.195959	6	6
130	Cheesman et al, 2013	warming	RB (root biomass)	Populus cathayana	AM	1.54667	0.130631	1.6	0.195959	6	6
131	Cheesman et al, 2013	warming	RB (root biomass)	Citharexylum	ECM	0.49	0.367423	0.45	0.220454	6	6
132	Cheesman et al, 2013	warming	RB (root biomass)	Theobroma cacao	AM	0.68	0.225167	0.71	0.225167	3	3
133	Yu et al, 2019	warming	RB (root biomass)	Abies faxoniana	ECM	6.13333	0.357771	8.58667	0.238499	5	5
134	Cheesman et al, 2013	warming	RB (root biomass)	Ficus insipida	AM	0.15	0.122474	0.29	0.244949	6	6
135	Fondo et al, 2010	warming	RB (root biomass)	Betula papyrifera	ECM	2.51613	0.193548	5.29032	0.258065	3	3
136	Mcwhirter et al, 2015	warming	RB (root biomass)	Fraxinus americana	AM	0.545455	0.314918	0.545455	0.275552	3	3
137	Pumpanen et al, 2012	warming	RB (root biomass)	Betula pendula Roth	ECM	1.97	0.52	2.21	0.32	5	5
138	Yang et al, 2013	warming	RB (root biomass)	Abies fabri	ECM	1.55	0.554256	1.33	0.32909	3	3
139	Cheesman et al, 2013	warming	RB (root biomass)	Tabebuia guayacan	AM	0.26	0.244949	0.58	0.342929	6	6
140	Yu et al, 2020	warming	RB (root biomass)	Picea purpurea	ECM	7.04	0.357771	8.26667	0.357771	5	5
141	Cheesman et al, 2013	warming	RB (root biomass)	Tabebuia guayacan	AM	0.26	0.244949	0.36	0.367423	6	6
142	Pumpanen et al, 2012	warming	RB (root biomass)	Picea abies	ECM	0.91	0.21	1.21	0.38	5	5
143	Ambebe et al, 2013	warming	RB (root biomass)	Betula papyrifera	ECM	6.98667	0.96	4.74667	0.42666	3	3
144	Pumpanen et al, 2012	warming	RB (root biomass)	Picea abies	ECM	0.91	0.21	1.63	0.44	5	5
145	Cheesman et al, 2013	warming	RB (root biomass)	Ormosia macrocalyx	AM	0.35	0.171464	0.44	0.440908	6	6
146	Chen et al, 2021	warming	RB (root biomass)	Populus cathayana	AM	1.41333	0.195959	2.74667	0.457222	6	6
147	Cheesman et al, 2013	warming	RB (root biomass)	Ficus insipida	AM	0.15	0.122474	0.43	0.489898	6	6
148	ferrari et al, 2018	warming	RB (root biomass)	Leucanthemopsis alpina	AM	0.360517	0.497413	0.466034	0.497413	8	8
149	Pumpanen et al, 2012	warming	RB (root biomass)	Betula pendula Roth	ECM	1.97	0.52	2.51	0.5	5	5
150	Cheesman et al, 2013	warming	RB (root biomass)	Luehea seemannii	AM	0.13	0.195959	0.44	0.538888	6	6
151	ferrari et al, 2021	warming	RB (root biomass)	Leucanthemopsis alpina	AM	0.36931	0.323318	0.457241	0.547154	8	8
152	Fondo et al, 2010	warming	RB (root biomass)	Betula papyrifera	ECM	2.51613	0.193548	3.45161	0.548387	3	3
153	ferrari et al, 2020	warming	RB (root biomass)	Pinus mugo	ECM	0.93578	0.667394	1.04587	0.572062	12	12
154	Mcwhirter et al, 2015	warming	RB (root biomass)	Rhus typhina	ECM	1.29545	0.787304	1.18182	0.669195	3	3
155	Cheesman et al, 2013	warming	RB (root biomass)	Luehea seemannii	AM	0.13	0.195959	0.46	0.685857	6	6
156	Bassow et al, 1994	warming	RB (root biomass)	Acer pensylvanicum	AM	0.426	0.247683	0.525	0.713605	3	3
157	Ambebe et al, 2013	warming	RB (root biomass)	Betula papyrifera	ECM	5.28	0.90667	4.37333	0.74667	3	3
158	Cheesman et al, 2013	warming	RB (root biomass)	Ormosia macrocalyx	AM	0.35	0.171464	0.44	0.783837	6	6
159	Ambebe et al, 2013	warming	RB (root biomass)	Betula papyrifera	ECM	5.97333	1.33334	4.64	0.8	3	3
160	ferrari et al, 2019	warming	RB (root biomass)	Pinus mugo	ECM	1.37615	0.762726	1.18349	0.858058	12	12
161	Cheesman et al, 2013	warming	RB (root biomass)	Tabebuia guayacan	AM	0.26	0.244949	0.77	0.881816	6	6
162	Cheesman et al, 2013	warming	RB (root biomass)	Luehea seemannii	AM	0.13	0.195959	0.67	1.02879	6	6
163	Noh et al, 2016	warming	RB (root biomass)	Quercus variabilis	ECM	4.82	1.07	5.45	1.27	4	4
164	Duan et al, 2018	warming	RB (root biomass)	Callitris rhomboidea	AM	13.07	3.5507	10.72	1.54153	3	3
165	Lewis et al, 2013	warming	RB (root biomass)	Eucalyptus sideroxylon	ECM	3.9	0.447214	4.5	2.01246	5	5
166	Uselman et al, 2001	warming	RB (root biomass)	Robinia pseudoacacia	ECM	3.65	1.21244	5.3	2.1997	3	3
167	Lewis et al, 2013	warming	RB (root biomass)	Eucalyptus saligna	ECM	7.4	2.45967	7	2.23607	5	5
168	Maenpaa et al, 2011	warming	RB (root biomass)	Populus tremula	AM	27.3	3.98372	34	2.94449	3	3
169	Uselman et al, 1999	warming	RB (root biomass)	Robinia pseudoacacia	ECM	3.65	1.9799	5.3	3.5921	8	8
170	Way et al, 2013	warming	RB (root biomass)	Populus tremuloides	AM	7.08812	2.65449	13.3142	3.81571	3	3
171	Yang et al, 2010	warming	RB (root biomass)	Abies faxoniana	ECM	88.04	10.53	103.04	4.87	3	3
172	An et al, 2017	warming	RB (root biomass)	Fraxinus rhynchophylla	AM	5.35519	2.17689	5.68306	5.11097	3	3
173	An et al, 2017	warming	RB (root biomass)	Quercus variabilis	ECM	18.3265	3.0666	20.2697	5.11111	3	3
174	Xu et al, 2021	warming	RB (root biomass)	Ginkgo biloba	AM	52	5.36936	70.1	5.3694	3	3
175	Rasheed et al, 2020	warming	RB (root biomass)	Pinus sylvestris	ECM	9.11	4	10.6	6.52	4	4
176	Duan et al, 2018	warming	RB (root biomass)	Pinus radiata	ECM	14.66	2.1131	18.46	6.6684	3	3
177	An et al, 2017	warming	RB (root biomass)	Zelkova serrata	AM	3.42398	4.42951	5.12144	7.15536	3	3
178	Wang et al, 2012	warming	RB (root biomass)	Abies faxoniana	ECM	91.38	11.2064	103.04	8.43509	3	3
179	Pu et al, 2017	warming	RB (root biomass)	Abies faxoniana	ECM	21.5	10.4	39.9	9.4	4	4
180	Xu et al, 2021	warming	RB (root biomass)	Populus alba	ECM	114.6	8.83346	155.3	20.7846	3	3
181	Dai et al, 2021	warming	RB (root biomass)	Populus tremula	AM	112.697	39.8434	101.66	21.3424	6	6
182	Yang et al, 2010	warming	R/S (root biomass/shoot biomass)	Abies faxoniana	ECM	0.36	0.01	0.34	0.001	3	3
183	Lib et al, 2017	warming	R/S (root biomass/shoot biomass)	Syzygium rehderianum	AM	0.18415	0.00627002	0.18462	0.00571577	3	3
184	Lib et al, 2017	warming	R/S (root biomass/shoot biomass)	Pinus massoniana	ECM	0.21641	0.0157097	0.26041	0.0088681	3	3
185	Lib et al, 2017	warming	R/S (root biomass/shoot biomass)	Castanopsis hystrix	ECM	0.38315	0.0108426	0.38461	0.0117087	3	3
186	Han et al, 2015	warming	R/S (root biomass/shoot biomass)	Pinus koraiensis	ECM	0.09	0.034641	0.07	0.0173205	3	3
187	Wang et al, 2012	warming	R/S (root biomass/shoot biomass)	Abies faxoniana	ECM	0.38	0.0519615	0.32	0.0173205	3	3
188	Zhao et al, 2009	warming	R/S (root biomass/shoot biomass)	Picea asperata	ECM	0.54935	0.02608	0.55781	0.0175	4	4
189	Yu et al, 2020	warming	R/S (root biomass/shoot biomass)	Picea purpurea	ECM	0.46075	0.0111803	0.453	0.0180003	5	5
190	Lib et al, 2017	warming	R/S (root biomass/shoot biomass)	Schima superba	AM	0.33792	0.0317139	0.28776	0.0222742	3	3
191	Duan et al, 2018	warming	R/S (root biomass/shoot biomass)	Pinus radiata	ECM	0.38685	0.0588031	0.37637	0.0342253	3	3
192	Duan et al, 2018	warming	R/S (root biomass/shoot biomass)	Callitris rhomboidea	AM	0.23836	0.0277821	0.25671	0.0342426	3	3
193	Han et al, 2015	warming	R/S (root biomass/shoot biomass)	Pinus densiflra	ECM	0.29	0.034641	0.28	0.034641	3	3
194	Yu et al, 2019	warming	R/S (root biomass/shoot biomass)	Abies faxoniana	ECM	0.46113	0.0275036	0.50027	0.0349497	5	5
195	Yin et al, 2012	warming	R/S (root biomass/shoot biomass)	Abies faxoniana	ECM	0.51765	0.04888	0.53967	0.04051	5	5
196	Zhao et al, 2009	warming	R/S (root biomass/shoot biomass)	Pinus tabulaeformis	ECM	0.47956	0.01528	0.53683	0.04174	4	4
197	Lib et al, 2017	warming	R/S (root biomass/shoot biomass)	Machilus breviflora	AM	0.24537	0.0416905	0.24303	0.0462631	3	3
198	Yin et al, 2012	warming	R/S (root biomass/shoot biomass)	Picea asperata	ECM	0.58939	0.05364	0.57927	0.06224	5	5
199	Han et al, 2015	warming	R/S (root biomass/shoot biomass)	Abies holophylla	ECM	0.31	0.0866025	0.26	0.069282	3	3
200	Chen et al, 2021	warming	R/S (root biomass/shoot biomass)	Populus cathayana	AM	1.25879	0.191403	0.9229	0.0721375	6	6
201	Dong et al, 2012	warming	R/S (root biomass/shoot biomass)	Quercus mongolica	ECM	1.81404	0.13483	0.98599	0.07391	6	6
202	Dai et al, 2021	warming	R/S (root biomass/shoot biomass)	Populus tremula	AM	0.80601	0.183418	0.76442	0.105622	6	6
203	Pumpanen et al, 2012	warming	R/S (root biomass/shoot biomass)	Pinus sylvestris	ECM	0.91	0.19	1.25	0.14	5	5
204	Pumpanen et al, 2012	warming	R/S (root biomass/shoot biomass)	Betula pendula Roth	ECM	1.46	0.12	1.87	0.15	5	5
205	Xu et al, 2021	warming	R/S (root biomass/shoot biomass)	Populus alba	ECM	1	0.173205	1	0.173205	3	3
206	Xu et al, 2021	warming	R/S (root biomass/shoot biomass)	Ginkgo biloba	AM	1.1	0.173205	1.1	0.173205	3	3
207	Han et al, 2015	warming	R/S (root biomass/shoot biomass)	Abies koreana	ECM	0.89	0.103923	0.73	0.190526	3	3
208	Pumpanen et al, 2012	warming	R/S (root biomass/shoot biomass)	Picea abies	ECM	0.67	0.24	0.89	0.2	5	5
209	Way et al, 2013	warming	R/S (root biomass/shoot biomass)	Populus tremuloides	AM	0.92	0.173205	1.12	0.207846	3	3
210	Pumpanen et al, 2012	warming	R/S (root biomass/shoot biomass)	Picea abies	ECM	0.67	0.24	0.73	0.21	5	5
211	Chen et al, 2021	warming	R/S (root biomass/shoot biomass)	Populus cathayana	AM	0.96225	0.145745	1.35599	0.214943	6	6
212	Dong et al, 2012	warming	R/S (root biomass/shoot biomass)	Quercus mongolica	ECM	1.81404	0.13483	2.27896	0.22373	6	6
213	Pumpanen et al, 2012	warming	R/S (root biomass/shoot biomass)	Pinus sylvestris	ECM	0.91	0.19	1.07	0.26	5	5
214	Yang et al, 2013	warming	R/S (root biomass/shoot biomass)	Abies fabri	ECM	0.57	0.173205	0.84	0.381051	3	3
215	Pumpanen et al, 2012	warming	R/S (root biomass/shoot biomass)	Betula pendula Roth	ECM	1.46	0.12	2.19	0.42	5	5
216	Han et al, 2015	warming	LB (leaf biomass)	Pinus koraiensis	ECM	0.07	0.0173205	0.06	0.0173205	3	3
217	Dong et al, 2012	warming	LB (leaf biomass)	Quercus mongolica	ECM	0.379418	0.06415	0.145924	0.018868	6	6
218	Bassow et al, 1994	warming	LB (leaf biomass)	Betula alleghaniensis	ECM	0.666	0.0207846	0.599	0.0190526	3	3
219	Bassow et al, 1994	warming	LB (leaf biomass)	Betula populifolia	ECM	0.648	0.0207846	0.755	0.0242487	3	3
220	Chen et al, 2021	warming	LB (leaf biomass)	Populus cathayana	AM	0.826667	0.032659	0.84	0.032659	6	6
221	Chen et al, 2021	warming	LB (leaf biomass)	Populus cathayana	AM	0.813333	0.0653205	1.13333	0.0326762	6	6
222	Cheesman et al, 2013	warming	LB (leaf biomass)	Adenanthera pavonina	AM	0.27	0.06	0.26	0.04	4	4
223	Ambebe et al, 2009	warming	LB (leaf biomass)	Betula papyrifera	ECM	1.77122	0.17712	1.5941	0.04428	4	4
224	Danyagri et al, 2014	warming	LB (leaf biomass)	Acer spicatum	AM	0.425225	0.0455842	0.475676	0.0455811	10	10
225	Cheesman et al, 2013	warming	LB (leaf biomass)	Garcina intermedia	AM	0.19	0.195959	0.1	0.0489898	6	6
226	Dong et al, 2012	warming	LB (leaf biomass)	Quercus mongolica	ECM	0.379418	0.06415	0.255117	0.049055	6	6
227	Han et al, 2015	warming	LB (leaf biomass)	Pinus densiflra	ECM	0.2	0.034641	0.26	0.0519615	3	3
228	Kurepin et al, 2018	warming	LB (leaf biomass)	Pinus sylvestris	ECM	0.421053	0.0665723	0.533333	0.055479	10	10
229	Cheesman et al, 2013	warming	LB (leaf biomass)	Adenanthera pavonina	AM	0.27	0.06	0.29	0.06	4	4
230	Cheesman et al, 2013	warming	LB (leaf biomass)	Adenanthera pavonina	AM	0.27	0.06	0.32	0.06	4	4
231	Kurepin et al, 2018	warming	LB (leaf biomass)	Pinus sylvestris	ECM	0.421053	0.0665723	0.515789	0.0665754	10	10
232	Han et al, 2015	warming	LB (leaf biomass)	Abies koreana	ECM	0.39	0.0866025	0.45	0.069282	3	3
233	Cheesman et al, 2013	warming	LB (leaf biomass)	Garcina intermedia	AM	0.19	0.195959	0.11	0.0734847	6	6
234	Kurepin et al, 2018	warming	LB (leaf biomass)	Picea abies	ECM	0.350877	0.055479	0.42807	0.0776719	10	10
235	Cheesman et al, 2013	warming	LB (leaf biomass)	Lacistema aggregatum	ECM	0.08	0.0519615	0.07	0.0866025	3	3
236	Kurepin et al, 2018	warming	LB (leaf biomass)	Picea abies	ECM	0.350877	0.055479	0.459649	0.0887651	10	10
237	Zhao et al, 2009	warming	LB (leaf biomass)	Picea asperata	ECM	1.33906	0.0515	1.54506	0.15452	4	4
238	Cheesman et al, 2013	warming	LB (leaf biomass)	Garcina intermedia	AM	0.19	0.195959	0.2	0.171464	6	6
239	Cheesman et al, 2013	warming	LB (leaf biomass)	Ormosia macrocalyx	AM	0.56	0.465403	0.34	0.195959	6	6
240	Cheesman et al, 2013	warming	LB (leaf biomass)	Theobroma cacao	AM	1.67	0.0866025	1.25	0.225167	3	3
241	Cheesman et al, 2013	warming	LB (leaf biomass)	Lacistema aggregatum	ECM	0.08	0.0519615	0.36	0.259808	3	3
242	Krause et al, 2013	warming	LB (leaf biomass)	Ficus insipida	AM	0.6	0.16	1.98	0.28	3	3
243	Han et al, 2015	warming	LB (leaf biomass)	Abies holophylla	ECM	1.25	0.138564	2.07	0.294449	3	3
244	Zhao et al, 2009	warming	LB (leaf biomass)	Pinus tabulaeformis	ECM	3.01288	0.46352	4.30043	0.30902	4	4
245	Fondo et al, 2010	warming	LB (leaf biomass)	Betula papyrifera	ECM	2.14765	0.161074	5.15436	0.322148	3	3
246	Cheesman et al, 2013	warming	LB (leaf biomass)	Ficus insipida	AM	0.25	0.220454	0.59	0.342929	6	6
247	Yang et al, 2013	warming	LB (leaf biomass)	Abies fabri	ECM	1	0.571577	0.72	0.34641	3	3
248	Cheesman et al, 2013	warming	LB (leaf biomass)	Theobroma cacao	AM	1.67	0.0866025	2.01	0.34641	3	3
249	Yu et al, 2019	warming	LB (leaf biomass)	Abies faxoniana	ECM	6.84058	0.648124	9.04348	0.388875	5	5
250	Fondo et al, 2010	warming	LB (leaf biomass)	Betula papyrifera	ECM	2.14765	0.161074	5.36913	0.42953	3	3
251	Bassow et al, 1994	warming	LB (leaf biomass)	Acer pensylvanicum	AM	0.891	0.443405	0.891	0.443405	3	3
252	Cheesman et al, 2013	warming	LB (leaf biomass)	Theobroma cacao	AM	1.67	0.0866025	1.94	0.450333	3	3
253	Cheesman et al, 2013	warming	LB (leaf biomass)	Citharexylum	ECM	0.9	0.538888	0.48	0.489898	6	6
254	Yu et al, 2020	warming	LB (leaf biomass)	Picea purpurea	ECM	7.42029	0.388875	9.3913	0.518522	5	5
255	Cheesman et al, 2013	warming	LB (leaf biomass)	Ficus insipida	AM	0.25	0.220454	0.58	0.587878	6	6
256	Cheesman et al, 2013	warming	LB (leaf biomass)	Ormosia macrocalyx	AM	0.21	0.293939	0.7	0.710352	6	6
257	Cheesman et al, 2013	warming	LB (leaf biomass)	Luehea seemannii	AM	0.56	0.465403	0.71	0.710352	6	6
258	Cheesman et al, 2013	warming	LB (leaf biomass)	Ormosia macrocalyx	AM	0.56	0.465403	0.64	0.783837	6	6
259	Cheesman et al, 2013	warming	LB (leaf biomass)	Tabebuia guayacan	AM	0.58	0.367423	0.92	0.832827	6	6
260	Cheesman et al, 2013	warming	LB (leaf biomass)	Luehea seemannii	AM	0.21	0.293939	0.73	0.906311	6	6
261	Way et al, 2013	warming	LB (leaf biomass)	Populus tremuloides	AM	4.40613	0.995427	6.13027	0.995427	3	3
262	Cheesman et al, 2013	warming	LB (leaf biomass)	Citharexylum	ECM	0.9	0.538888	1.2	1.00429	6	6
263	Cheesman et al, 2013	warming	LB (leaf biomass)	Ficus insipida	AM	0.25	0.220454	0.86	1.10227	6	6
264	Cheesman et al, 2013	warming	LB (leaf biomass)	Tabebuia guayacan	AM	0.58	0.367423	1.35	1.15126	6	6
265	Cheesman et al, 2013	warming	LB (leaf biomass)	Luehea seemannii	AM	0.21	0.293939	0.95	1.4452	6	6
266	Lewis et al, 2013	warming	LB (leaf biomass)	Eucalyptus sideroxylon	ECM	5.1	2.23607	4.3	1.56525	5	5
267	Cheesman et al, 2013	warming	LB (leaf biomass)	Tabebuia guayacan	AM	0.58	0.367423	1.73	2.18005	6	6
268	Yang et al, 2010	warming	LB (leaf biomass)	Abies faxoniana	ECM	114.66	5.93	129.89	2.26	3	3
269	Lewis et al, 2013	warming	LB (leaf biomass)	Eucalyptus saligna	ECM	10.4	3.3541	11.1	2.68328	5	5
270	Duan et al, 2018	warming	LB (leaf biomass)	Pinus radiata	ECM	18.77	2.35559	18.7	3.51606	3	3
271	Rasheed et al, 2020	warming	LB (leaf biomass)	Pinus sylvestris	ECM	10.2	2.92	19	4.26	4	4
272	Dai et al, 2021	warming	LB (leaf biomass)	Populus tremula	AM	47.3029	1.2196	43.5685	4.26873	6	6
273	Wang et al, 2012	warming	LB (leaf biomass)	Abies faxoniana	ECM	111.33	19.8666	136.59	7.39586	3	3
274	Duan et al, 2018	warming	LB (leaf biomass)	Callitris rhomboidea	AM	27.27	5.24811	24.39	8.0194	3	3
275	Dong et al, 2012	warming	SB (stem biomass)	Quercus mongolica	ECM	0.224764	0.045496	0.0872006	0.0113739	6	6
276	Bassow et al, 1994	warming	SB (stem biomass)	Betula populifolia	ECM	0.304	0.0138564	0.325	0.0138564	3	3
277	Wheeler et al, 2017	warming	SB (stem biomass)	Acer rubrum	AM	0.0399438	0.0043788	0.100112	0.0157634	3	3
278	Han et al, 2015	warming	SB (stem biomass)	Pinus koraiensis	ECM	0.06	0.0173205	0.05	0.0173205	3	3
279	Bassow et al, 1994	warming	SB (stem biomass)	Betula alleghaniensis	ECM	0.295	0.0121244	0.382	0.0173205	3	3
280	Chen et al, 2021	warming	SB (stem biomass)	Populus cathayana	AM	0.13	0.0979796	0.09	0.0244949	6	6
281	Cheesman et al, 2013	warming	SB (stem biomass)	Garcina intermedia	AM	0.74	0.0734847	0.79	0.0244949	6	6
282	Han et al, 2015	warming	SB (stem biomass)	Pinus densiflra	ECM	0.24	0.0173205	0.25	0.034641	3	3
283	Dong et al, 2012	warming	SB (stem biomass)	Quercus mongolica	ECM	0.224764	0.045496	0.18229	0.035544	6	6
284	Cheesman et al, 2013	warming	SB (stem biomass)	Adenanthera pavonina	AM	0.09	0.04	0.13	0.04	4	4
285	Cheesman et al, 2013	warming	SB (stem biomass)	Adenanthera pavonina	AM	0.09	0.04	0.16	0.04	4	4
286	Chen et al, 2021	warming	SB (stem biomass)	Populus cathayana	AM	0.94	0.0244949	1.1	0.0489898	6	6
287	Cheesman et al, 2013	warming	SB (stem biomass)	Adenanthera pavonina	AM	0.09	0.04	0.15	0.06	4	4
288	Kurepin et al, 2018	warming	SB (stem biomass)	Pinus sylvestris	ECM	0.576159	0.0753919	0.449007	0.062825	10	10
289	Cheesman et al, 2013	warming	SB (stem biomass)	Garcina intermedia	AM	0.13	0.0979796	0.15	0.0734847	6	6
290	Kurepin et al, 2018	warming	SB (stem biomass)	Pinus sylvestris	ECM	0.576159	0.0753919	0.476821	0.0753919	10	10
291	Kurepin et al, 2018	warming	SB (stem biomass)	Picea abies	ECM	0.643709	0.0502612	0.564238	0.0879588	10	10
292	Kurepin et al, 2018	warming	SB (stem biomass)	Picea abies	ECM	0.643709	0.0502612	0.53245	0.0879588	10	10
293	Cheesman et al, 2013	warming	SB (stem biomass)	Garcina intermedia	AM	0.13	0.0979796	0.17	0.0979796	6	6
294	Ambebe et al, 2009	warming	SB (stem biomass)	Betula papyrifera	ECM	1.21019	0.15924	0.923567	0.127393	4	4
295	Krause et al, 2013	warming	SB (stem biomass)	Ficus insipida	AM	0.27	0.04	0.95	0.13	3	3
296	Zhao et al, 2009	warming	SB (stem biomass)	Picea asperata	ECM	2.42202	0.14678	2.86239	0.14678	4	4
297	Cheesman et al, 2013	warming	SB (stem biomass)	Ormosia macrocalyx	AM	0.36	0.514393	0.16	0.146969	6	6
298	Fondo et al, 2010	warming	SB (stem biomass)	Betula papyrifera	ECM	1.56688	0.11465	4.01274	0.152866	3	3
299	Cheesman et al, 2013	warming	SB (stem biomass)	Citharexylum	ECM	0.33	0.269444	0.16	0.171464	6	6
300	Cheesman et al, 2013	warming	SB (stem biomass)	Ficus insipida	AM	0.07	0.0734847	0.18	0.195959	6	6
301	Yang et al, 2013	warming	SB (stem biomass)	Abies fabri	ECM	1.81	0.762102	0.91	0.225167	3	3
302	Fondo et al, 2010	warming	SB (stem biomass)	Betula papyrifera	ECM	1.56688	0.11465	3.89809	0.229299	3	3
303	Han et al, 2015	warming	SB (stem biomass)	Abies holophylla	ECM	0.58	0.155885	0.74	0.242487	3	3
304	Cheesman et al, 2013	warming	SB (stem biomass)	Ficus insipida	AM	0.07	0.0734847	0.25	0.244949	6	6
305	Cheesman et al, 2013	warming	SB (stem biomass)	Theobroma cacao	AM	1.13	0.363731	1.01	0.259808	3	3
306	Cheesman et al, 2013	warming	SB (stem biomass)	Tabebuia guayacan	AM	0.14	0.122474	0.31	0.269444	6	6
307	Cheesman et al, 2013	warming	SB (stem biomass)	Citharexylum	ECM	0.33	0.269444	0.41	0.269444	6	6
308	Han et al, 2015	warming	SB (stem biomass)	Abies koreana	ECM	0.88	0.121244	0.87	0.277128	3	3
309	Cheesman et al, 2013	warming	SB (stem biomass)	Theobroma cacao	AM	1.13	0.363731	1.37	0.277128	3	3
310	Zhao et al, 2009	warming	SB (stem biomass)	Pinus tabulaeformis	ECM	3.85321	0.29358	5.24771	0.29358	4	4
311	Bassow et al, 1994	warming	SB (stem biomass)	Acer pensylvanicum	AM	0.409	0.259808	0.585	0.299645	3	3
312	Cheesman et al, 2013	warming	SB (stem biomass)	Theobroma cacao	AM	1.13	0.363731	1.39	0.311769	3	3
313	Cheesman et al, 2013	warming	SB (stem biomass)	Ficus insipida	AM	0.07	0.0734847	0.26	0.318434	6	6
314	Cheesman et al, 2013	warming	SB (stem biomass)	Ormosia macrocalyx	AM	0.36	0.514393	0.36	0.391918	6	6
315	Cheesman et al, 2013	warming	SB (stem biomass)	Ormosia macrocalyx	AM	0.36	0.514393	0.44	0.416413	6	6
316	Cheesman et al, 2013	warming	SB (stem biomass)	Tabebuia guayacan	AM	0.14	0.122474	0.47	0.489898	6	6
317	Yu et al, 2019	warming	SB (stem biomass)	Abies faxoniana	ECM	6.89855	0.518499	8.75362	0.648147	5	5
318	Yu et al, 2020	warming	SB (stem biomass)	Picea purpurea	ECM	8.11594	0.648147	9.21739	0.648147	5	5
319	Cheesman et al, 2013	warming	SB (stem biomass)	Tabebuia guayacan	AM	0.14	0.122474	0.69	0.857321	6	6
320	Way et al, 2013	warming	SB (stem biomass)	Populus tremuloides	AM	1.91571	0.829531	4.40613	1.16134	3	3
321	Rasheed et al, 2020	warming	SB (stem biomass)	Pinus sylvestris	ECM	2.02	0.66	4.72	1.46	4	4
322	Lewis et al, 2013	warming	SB (stem biomass)	Eucalyptus sideroxylon	ECM	3.2	0.447214	4.3	1.78885	5	5
323	Lewis et al, 2013	warming	SB (stem biomass)	Eucalyptus saligna	ECM	7.8	2.68328	9.4	2.01246	5	5
324	Duan et al, 2018	warming	SB (stem biomass)	Pinus radiata	ECM	10.09	1.57617	10.19	2.8752	3	3
325	Duan et al, 2018	warming	SB (stem biomass)	Callitris rhomboidea	AM	10.91	2.09578	11.09	3.65463	3	3
326	Yang et al, 2010	warming	SB (stem biomass)	Abies faxoniana	ECM	127.94	7.43	177.11	5.42	3	3
327	Dai et al, 2021	warming	SB (stem biomass)	Populus tremula	AM	70.1835	11.2361	65.1376	11.2363	6	6
328	Wang et al, 2012	warming	SB (stem biomass)	Abies faxoniana	ECM	83.68	5.43864	112.19	21.5987	3	3
329	Zhao et al, 2009	warming	CRB (coarse root biomass)	Pinus tabulaeformis	ECM	2.16738	0.17168	3.62661	0.08584	4	4
330	Zhao et al, 2009	warming	CRB (coarse root biomass)	Picea asperata	ECM	1.52361	0.08582	1.71674	0.12876	4	4
331	Dawes et al, 2015	warming	CRB (coarse root biomass)	Larix decidua	ECM	1956.04	344.019	1978.02	294.87	5	5
332	Dawes et al, 2015	warming	CRB (coarse root biomass)	Pinus uncinate	ECM	1296.7	147.446	2637.36	540.592	5	5
333	Zhao et al, 2009	warming	FRB (fine root biomass)	Picea asperata	ECM	0.497788	0.088494	0.707965	0.088494	4	4
334	Zhao et al, 2009	warming	FRB (fine root biomass)	Pinus tabulaeformis	ECM	1.0177	0.0885	1.32743	0.0885	4	4
335	Liu et al, 2017	warming	FRB (fine root biomass)	Quercus aliena	ECM	2.37654	0.106919	2.74691	0.106919	3	3
336	Yu et al, 2020	warming	FRB (fine root biomass)	Picea purpurea	ECM	2.14286	0.119786	2.69643	0.119786	5	5
337	Yu et al, 2019	warming	FRB (fine root biomass)	Abies faxoniana	ECM	1.69643	0.159722	2.58929	0.199636	5	5
338	Liu et al, 2017	warming	FRB (fine root biomass)	Quercus aliena	ECM	2.90123	0.160388	4.01235	0.213822	3	3
339	Liu et al, 2017	warming	FRB (fine root biomass)	Quercus aliena	ECM	2.59259	0.213839	2.46914	0.26729	3	3
340	Cao et al, 2020	warming	FRB (fine root biomass)	Cunninghamia lanceolata	AM	99.6	11.1	95	8.3	5	5
341	Dawes et al, 2015	warming	FRB (fine root biomass)	Larix decidua	ECM	945.055	98.2886	725.275	49.1443	5	5
342	Dawes et al, 2015	warming	FRB (fine root biomass)	Pinus uncinate	ECM	1164.84	98.2752	637.363	98.2886	5	5
343	Bronson et al, 2008	warming	FRB (fine root biomass)	Picea mariana	ECM	485	240	360	110	4	4
344	Bronson et al, 2008	warming	FRB (fine root biomass)	Picea mariana	ECM	325	90	220	120	4	4
345	Bronson et al, 2008	warming	FRB (fine root biomass)	Picea mariana	ECM	285	30	175	130	4	4
346	Bronson et al, 2008	warming	FRB (fine root biomass)	Picea mariana	ECM	480	230	410	170	4	4
347	Park et al, 2020	warming	LM (litter mass)	Pinus densiflora	ECM	487.77	112.147	392.806	14.9528	3	3
348	Park et al, 2020	warming	LM (litter mass)	Quercus variabilis	ECM	271.942	97.1958	293.525	44.8584	3	3
349	Sun et al, 2016	warming	SOCS (soil organic carbon stocks)	Picea sperata	ECM	13.2	1.1	24.5	0.2	3	3
350	Sun et al, 2016	warming	SOCS (soil organic carbon stocks)	Picea sperata	ECM	20.6	0.1	30.5	0.2	3	3
351	Lia et al, 2018	warming	SOCS (soil organic carbon stocks)	Cunninghamia lanceolata	AM	15.32	3.09	13.37	0.22	3	3
352	Yang et al, 2020	warming	SOCS (soil organic carbon stocks)	Cunninghamia lanceolata	AM	3.7	0.9	3.95	0.24	3	3
353	Sun et al, 2016	warming	SOCS (soil organic carbon stocks)	Picea sperata	ECM	13.5	0.3	19.3	0.3	3	3
354	Yang et al, 2020	warming	SOCS (soil organic carbon stocks)	Cunninghamia lanceolata	AM	6.94	2.3	6.92	0.4	5	5
355	Lia et al, 2018	warming	SOCS (soil organic carbon stocks)	Cunninghamia lanceolata	AM	15.12	2.96	13.16	0.43	3	3
356	Yang et al, 2020	warming	SOCS (soil organic carbon stocks)	Cunninghamia lanceolata	AM	4.84	0.68	4.18	0.49	5	5
357	Yang et al, 2020	warming	SOCS (soil organic carbon stocks)	Cunninghamia lanceolata	AM	4.06	0.63	3.59	0.53	5	5
358	Yang et al, 2020	warming	SOCS (soil organic carbon stocks)	Cunninghamia lanceolata	AM	8.39	1.93	6.16	0.65	5	5
359	Schnecker et al, 2016	warming	SOCS (soil organic carbon stocks)	Picea abies	ECM	4.96	0.75	4.74	0.67	3	3
360	Schnecker et al, 2016	warming	SOCS (soil organic carbon stocks)	Picea abies	ECM	8.68	1.62	6.43	0.69	3	3
361	Yang et al, 2020	warming	SOCS (soil organic carbon stocks)	Cunninghamia lanceolata	AM	5.13	1.06	5.22	0.78	5	5
362	Yin et al, 2012	warming	SOCS (soil organic carbon stocks)	Abies faxoniana	ECM	74.9	0.8	74.5	1	5	5
363	Cao et al, 2020	warming	SOCS (soil organic carbon stocks)	Cunninghamia lanceolata	AM	39.8	1.78	35	1.05	5	5
364	Zhao et al, 2014	warming	SOCS (soil organic carbon stocks)	Abies faxoniana	ECM	26.7	1.4	32.7	1.3	4	4
365	Zhao et al, 2014	warming	SOCS (soil organic carbon stocks)	Picea asperata	ECM	32.8	1	31.9	1.4	4	4
366	Yin et al, 2012	warming	SOCS (soil organic carbon stocks)	Abies faxoniana	ECM	73.6	1	71.4	1.4	5	5
367	Lia et al, 2018	warming	SOCS (soil organic carbon stocks)	Cunninghamia lanceolata	AM	14.18	1.16	11.61	1.46	3	3
368	Yin et al, 2012	warming	SOCS (soil organic carbon stocks)	Abies faxoniana	ECM	68.47	1.42	72.3	1.7	5	5
369	Wang et al, 2017	warming	SOCS (soil organic carbon stocks)	Castanopsis hystrix	ECM	43.2618	3.5682	37.0815	1.78419	3	3
370	Yang et al, 2020	warming	SOCS (soil organic carbon stocks)	Cunninghamia lanceolata	AM	11.72	3.04	10.79	1.93	5	5
371	Yang et al, 2020	warming	SOCS (soil organic carbon stocks)	Cunninghamia lanceolata	AM	13.83	1.32	13.78	2.19	5	5
372	Lia et al, 2018	warming	SOCS (soil organic carbon stocks)	Cunninghamia lanceolata	AM	14.29	1.02	12.71	2.24	3	3
373	Lia et al, 2018	warming	SOCS (soil organic carbon stocks)	Cunninghamia lanceolata	AM	10.85	1.19	8.98	2.33	3	3
374	Yin et al, 2012	warming	SOCS (soil organic carbon stocks)	Picea asperata	ECM	69.3	1.4	71.5	2.4	5	5
375	Lia et al, 2018	warming	SOCS (soil organic carbon stocks)	Cunninghamia lanceolata	AM	10.24	1.34	8.77	2.44	3	3
376	Wang et al, 2017	warming	SOCS (soil organic carbon stocks)	Castanopsis hystrix	ECM	42.5751	3.5682	37.4249	2.97341	3	3
377	Yu et al, 2020	warming	SOCS (soil organic carbon stocks)	Picea purpurea	ECM	26.7	11.6276	28	3.80132	5	5
378	Yin et al, 2012	warming	SOCS (soil organic carbon stocks)	Picea asperata	ECM	75.4	4.5	70.9	5.9	5	5
379	Yin et al, 2012	warming	SOCS (soil organic carbon stocks)	Picea asperata	ECM	74.5	4.3	78.6	6.36	5	5
380	Yu et al, 2019	warming	SOCS (soil organic carbon stocks)	Abies faxoniana	ECM	26.7	11.6276	29.8	9.16788	5	5
381	Bergner et al, 2004	warming	SOCS (soil organic carbon stocks)	Picea mariana	ECM	24.9147	24.6621	35.4949	14.6301	6	6
382	Zou et al, 2018	warming	SOCS (soil organic carbon stocks)	Picea sitchensis	ECM	360.87	45.184	421.739	67.7769	3	3
383	Xu et al, 2013	warming	SOCS (soil organic carbon stocks)	Abies faxoniana	ECM	43565	3769.76	41997	3613	6	6
384	Xu et al, 2013	warming	SOCS (soil organic carbon stocks)	Abies faxoniana	ECM	50733	6302.54	45010	5543.2	6	6
385	Xu et al, 2013	warming	MBC (microbial biomass carbon)	Abies faxoniana	ECM	0.38	0.195959	0.36	0.220454	6	6
386	Xu et al, 2013	warming	MBC (microbial biomass carbon)	Abies faxoniana	ECM	0.3	0.220454	0.3	0.244949	6	6
387	Wangb et al, 2017	warming	MBC (microbial biomass carbon)	Quercus aliena	ECM	588.03	58.04	825.03	17.42	3	3
388	Park et al, 2020	warming	MBC (microbial biomass carbon)	Pinus densiflora	ECM	196.262	32.3738	137.85	20.2355	3	3
389	Wangb et al, 2017	warming	MBC (microbial biomass carbon)	Quercus aliena	ECM	670.23	114.19	607.59	26.67	3	3
390	Park et al, 2020	warming	MBC (microbial biomass carbon)	Quercus variabilis	ECM	261.682	20.2338	376.168	32.3755	3	3
391	Yin et al, 2012	warming	MBC (microbial biomass carbon)	Picea asperata	ECM	883.2	83.7	888.1	39.9	5	5
392	Xu et al, 2010	warming	MBC (microbial biomass carbon)	Picea asperata	ECM	240.523	36.6013	245.752	41.8301	3	3
393	Yin et al, 2012	warming	MBC (microbial biomass carbon)	Abies faxoniana	ECM	890.5	76.4	874.4	57.9	5	5
394	Yin et al, 2012	warming	MBC (microbial biomass carbon)	Abies faxoniana	ECM	916.5	25.9	890.9	75.3	5	5
395	Yin et al, 2012	warming	MBC (microbial biomass carbon)	Picea asperata	ECM	941.5	89.4	1024.9	88.6	5	5
396	Yin et al, 2012	warming	MBC (microbial biomass carbon)	Picea asperata	ECM	1014.5	113.9	931.8	92.4	5	5
397	Yin et al, 2012	warming	MBC (microbial biomass carbon)	Abies faxoniana	ECM	1037.6	41.5	1174.1	109.9	5	5
398	Xiong et al, 2010	warming	MBC (microbial biomass carbon)	Pinus armandii	ECM	1118.92	454.054	1037.84	227.027	4	4
399	Zou et al, 2018	warming	MBC (microbial biomass carbon)	Picea sitchensis	ECM	856.522	489.491	756.522	414.185	3	3
400	Xiong et al, 2010	warming	MBC (microbial biomass carbon)	Pinus armandii	ECM	1021.62	551.351	1167.57	518.919	4	4
401	Xiong et al, 2010	warming	MBC (microbial biomass carbon)	Pinus armandii	ECM	745.946	389.189	1102.7	713.514	4	4
402	Xiong et al, 2010	warming	MBC (microbial biomass carbon)	Pinus armandii	ECM	1345.95	681.081	1897.3	972.973	4	4
403	Niinisto et al, 2004	warming	SR (soil respiration)	Pinus sylvestris	ECM	0.128838	0.0205774	0.181818	0.0514436	3	3
404	Niinisto et al, 2004	warming	SR (soil respiration)	Pinus sylvestris	ECM	0.133333	0.0308662	0.192214	0.0514436	3	3
405	Li et al, 2017	warming	SR (soil respiration)	Pinus densiflora	ECM	1.1	0.1	2.14	0.07	3	3
406	Niinisto et al, 2004	warming	SR (soil respiration)	Pinus sylvestris	ECM	0.161509	0.0205774	0.25013	0.0720211	3	3
407	Niinisto et al, 2004	warming	SR (soil respiration)	Pinus sylvestris	ECM	0.183785	0.0411549	0.278346	0.0720211	3	3
408	Wanga et al, 2016	warming	SR (soil respiration)	Quercus aliena	ECM	1.79	0.415692	2.01	0.207846	3	3
409	Wang et al, 2017	warming	SR (soil respiration)	Castanopsis hystrix	ECM	4.57143	0.20317	4.64762	0.22857	3	3
410	Li et al, 2017	warming	SR (soil respiration)	Pinus densiflora	ECM	2.39	0.28	3.58	0.35	3	3
411	Wang et al, 2017	warming	SR (soil respiration)	Castanopsis hystrix	ECM	3.40317	0.263947	3.58095	0.351918	3	3
412	Jarvi et al, 2013	warming	SR (soil respiration)	Acer saccharum	AM	3.34615	0.349741	2.10577	0.399704	3	3
413	Marty et al, 2019	warming	SR (soil respiration)	Picea mariana	ECM	2.44868	0.70381	3.53372	0.48388	3	3
414	Xu et al, 2013	warming	SR (soil respiration)	Abies faxoniana	ECM	4.23	0.440908	4.38	0.514393	6	6
415	Wang et al, 2017	warming	SR (soil respiration)	Castanopsis hystrix	ECM	5.76508	0.439889	5.71429	0.52786	3	3
416	Li et al, 2017	warming	SR (soil respiration)	Pinus densiflora	ECM	2.57	0.75	3.63	0.55	3	3
417	Xu et al, 2010	warming	SR (soil respiration)	Picea asperata	ECM	4.73239	0.619718	4.22535	0.56338	3	3
418	Xu et al, 2013	warming	SR (soil respiration)	Abies faxoniana	ECM	3.97	0.783837	4.19	0.587878	6	6
419	Jarvi et al, 2013	warming	SR (soil respiration)	Acer saccharum	AM	4.74441	0.747051	4.16933	0.747051	3	3
420	Jarvi et al, 2013	warming	SR (soil respiration)	Acer saccharum	AM	3.96805	0.44823	4.37061	0.846657	3	3
421	Jarvi et al, 2013	warming	SR (soil respiration)	Acer saccharum	AM	5.39423	0.849371	3.02885	0.849371	3	3
422	Jarvi et al, 2013	warming	SR (soil respiration)	Acer saccharum	AM	2.84665	0.249017	3.42173	1.39449	3	3
423	Jarvi et al, 2013	warming	SR (soil respiration)	Acer saccharum	AM	7.06731	0.549593	6.02885	2.54811	3	3
424	Zou et al, 2018	warming	SR (soil respiration)	Picea sitchensis	ECM	65.625	8.11899	90.625	13.5316	3	3
425	Bergner et al, 2004	warming	SR (soil respiration)	Picea mariana	ECM	124.272	26.1596	140.777	19.0252	6	6
426	Tang et al, 2012	warming	SR (soil respiration)	Abies faxoniana	ECM	699.516	13.0751	732.203	21.7918	5	5
427	Allison et al, 2008	warming	SR (soil respiration)	Picea mariana	ECM	97.8261	36.4576	58.6957	29.1661	5	5
428	Allison et al, 2008	warming	SR (soil respiration)	Picea mariana	ECM	228.261	102.081	101.087	29.1661	5	5
429	Bronson et al, 2008	warming	SR (soil respiration)	Picea mariana	ECM	477.698	80.5755	385.612	34.5324	4	4
430	Tang et al, 2012	warming	SR (soil respiration)	Picea asperata	ECM	640.678	10.8959	780.145	37.046	5	5
431	Zou et al, 2018	warming	SR (soil respiration)	Picea sitchensis	ECM	145.313	8.11812	253.125	43.3013	3	3
432	Comstedt et al, 2006	warming	SR (soil respiration)	Picea abies	ECM	200	25	192	45	3	3
433	Zou et al, 2018	warming	SR (soil respiration)	Picea sitchensis	ECM	212.5	10.8253	343.75	56.8338	3	3
434	Comstedt et al, 2006	warming	SR (soil respiration)	Picea abies	ECM	267	82	307	63	3	3
435	Bronson et al, 2008	warming	SR (soil respiration)	Picea mariana	ECM	356.835	69.0647	448.921	92.0863	4	4
436	Bronson et al, 2008	warming	SR (soil respiration)	Picea mariana	ECM	333.813	80.5755	224.46	103.597	4	4
437	Comstedt et al, 2006	warming	SR (soil respiration)	Picea abies	ECM	467	107	498	109	3	3
438	Allison et al, 2008	warming	SR (soil respiration)	Picea mariana	ECM	123.913	80.2068	140.217	109.373	5	5
439	Bronson et al, 2008	warming	SR (soil respiration)	Picea mariana	ECM	517.986	69.0647	569.784	138.129	4	4

## Sheet: Nitrogen deposition
No	References	Latitude	Longitude	MAP(mm)	MAT(°C)	Treatment		TB_RR	TB_var	SOCS_RR	SOCS_var
1	Cui et al, 2021	25.7	118.1	1800	20	nitrogen deposition	80			0.166	0.007
2	Cui et al, 2021	25.7	118.1	1800	20	nitrogen deposition	40			0.038	0.008
3	Cui et al, 2021	25.7	118.1	1800	20	nitrogen deposition	40			0.005	0.002
4	Cui et al, 2021	25.7	118.1	1800	20	nitrogen deposition	80			-0.17	0.002
5	He et al, 2021	47.1667	128.883	676	-0.3	nitrogen deposition	40			-0.072	0.043
6	He et al, 2021	47.1667	128.883	676	-0.3	nitrogen deposition	20			-0.123	0.059
7	He et al, 2021	47.1667	128.883	676	-0.3	nitrogen deposition	80			0.24	0.028
8	Jing et al, 2021	35.9667	110.083	584.4	9.7	nitrogen deposition	30			0.069	0.002
9	Jing et al, 2021	35.9667	110.083	584.4	9.7	nitrogen deposition	90			0.042	0.002
10	Jing et al, 2021	35.9667	110.083	584.4	9.7	nitrogen deposition	60			0.134	0.001
11	Jing et al, 2021	35.9667	110.083	584.4	9.7	nitrogen deposition	90			0.025	0.022
12	Jing et al, 2021	35.9667	110.083	584.4	9.7	nitrogen deposition	60			-0.282	0.049
13	Jing et al, 2021	35.9667	110.083	584.4	9.7	nitrogen deposition	30			0.088	0.02
14	Liu et al, 2021	30.2667	119.733	1420	15.6	nitrogen deposition	45	0.071	0.036
15	Liu et al, 2021	30.2667	119.733	1420	15.6	nitrogen deposition	45	0.32	0.016
16	Yu et al, 2021	35.8667	120.817	1050	14.6	nitrogen deposition	100			-0.016	0.006
17	Yu et al, 2021	35.8667	120.817	1050	14.6	nitrogen deposition	100			-0.106	0.001
18	Yu et al, 2021	35.8667	120.817	1050	14.6	nitrogen deposition	300			-0.025	0.006
19	Yu et al, 2021	35.8667	120.817	1050	14.6	nitrogen deposition	300			-0.09	0.001
20	Jiao et al, 2021	26.3167	117.6	1749	19.2	nitrogen deposition	80			0.005	0.015
21	Jiao et al, 2021	26.3167	117.6	1749	19.2	nitrogen deposition	80			-0.166	0.008
22	Jiao et al, 2021	26.3167	117.6	1749	19.2	nitrogen deposition	40			-0.117	0.006
23	Jiao et al, 2021	26.3167	117.6	1749	19.2	nitrogen deposition	40			-0.171	0.006
24	Cao et al, 2020	26.3167	117.6	1750	19.1	nitrogen deposition	40			-0.049	0.001
25	Cao et al, 2020	26.3167	117.6	1750	19.1	nitrogen deposition	80			0.073	0.001
26	Li et al, 2020	35.9667	110.083	574.4	9.8	nitrogen deposition	30			0.069	0.002
27	Li et al, 2020	35.9667	110.083	574.4	9.8	nitrogen deposition	90			0.042	0.002
28	Li et al, 2020	35.9667	110.083	574.4	9.8	nitrogen deposition	60			0.134	0.001
29	Li et al, 2020	30.25	119.717	1613.9	15.6	nitrogen deposition	60			0.048	0.027
30	Li et al, 2020	30.2333	119.7	1613.9	15.6	nitrogen deposition	30			0.109	0.038
31	Yang et al, 2020	36.3	111.75	662	9.9	nitrogen deposition	150			-0.541	0.001
32	Yang et al, 2020	36.3	111.75	662	9.9	nitrogen deposition	100			-0.041	0
33	Yang et al, 2020	36.3	111.75	662	9.9	nitrogen deposition	50			0.066	0
34	Li et al, 2020	37.4667	111.367	550	8.85	nitrogen deposition	150			0.083	0.006
35	Li et al, 2020	37.4667	111.367	550	8.85	nitrogen deposition	150			-0.023	0.006
36	Li et al, 2020	37.4667	111.367	550	8.85	nitrogen deposition	80			-0.119	0.01
37	Li et al, 2020	37.4667	111.367	550	8.85	nitrogen deposition	150			0.048	0.005
38	Li et al, 2020	37.4667	111.367	550	8.85	nitrogen deposition	80			-0.115	0.019
39	Li et al, 2020	37.4667	111.367	550	8.85	nitrogen deposition	80			-0.079	0.013
40	Lv et al, 2020	47.1667	128.883	676	-0.3	nitrogen deposition	20			0.095	0.003
41	Lv et al, 2020	47.1667	128.883	676	-0.3	nitrogen deposition	40			0.209	0.002
42	Lv et al, 2020	47.1667	128.883	676	-0.3	nitrogen deposition	20			0.153	0.002
43	Lv et al, 2020	47.1667	128.883	676	-0.3	nitrogen deposition	40			0.312	0.009
44	Lv et al, 2020	47.1667	128.883	676	-0.3	nitrogen deposition	80			0.394	0.008
45	Lv et al, 2020	47.1667	128.883	676	-0.3	nitrogen deposition	80			0.256	0.011
46	Shang et al, 2020	23.7667	101.267	1050	19.6	nitrogen deposition	50			0.297	0.001
47	Shang et al, 2020	23.7667	101.267	1050	19.6	nitrogen deposition	300			0.23	0
48	Shang et al, 2020	23.7667	101.267	1050	19.6	nitrogen deposition	150			-0.404	0
49	Shang et al, 2020	23.7667	101.267	1050	19.6	nitrogen deposition	50			0.322	0
50	Shang et al, 2020	23.7667	101.267	1050	19.6	nitrogen deposition	150			0.299	0
51	Shang et al, 2020	23.7667	101.267	1050	19.6	nitrogen deposition	300			0.426	0
52	Shang et al, 2020	23.7667	101.267	1050	19.6	nitrogen deposition	50			-0.232	0
53	Shang et al, 2020	23.7667	101.267	1050	19.6	nitrogen deposition	150			-0.382	0
54	Shang et al, 2020	23.7667	101.267	1050	19.6	nitrogen deposition	300			-0.285	0
55	Shang et al, 2020	23.7667	101.267	1050	19.6	nitrogen deposition	300			0.299	0.001
56	Shang et al, 2020	23.7667	101.267	1050	19.6	nitrogen deposition	50			-0.37	0.001
57	Shang et al, 2020	23.7667	101.267	1050	19.6	nitrogen deposition	150			0.449	0.001
58	Shang et al, 2020	23.7667	101.267	1050	19.6	nitrogen deposition	50			0.401	0
59	Shang et al, 2020	23.7667	101.267	1050	19.6	nitrogen deposition	150			-0.328	0.002
60	Shang et al, 2020	23.7667	101.267	1050	19.6	nitrogen deposition	50			0.401	0.001
61	Shang et al, 2020	23.7667	101.267	1050	19.6	nitrogen deposition	150			0.324	0.001
62	Shang et al, 2020	23.7667	101.267	1050	19.6	nitrogen deposition	300			0.089	0.001
63	Shang et al, 2020	23.7667	101.267	1050	19.6	nitrogen deposition	300			0.277	0
64	Fan et al, 2019	26.1833	117.467	1700	19.4	nitrogen deposition	80			0.086	0.005
65	Fan et al, 2019	26.1833	117.467	1700	19.4	nitrogen deposition	80			-0.094	0.011
66	Fan et al, 2019	26.1833	117.467	1700	19.4	nitrogen deposition	40			0.13	0.009
67	Fan et al, 2019	26.1833	117.467	1700	19.4	nitrogen deposition	40			0.068	0.038
68	Han et al, 2019	29.35	120.55	1424	15.2583	nitrogen deposition	200	-0.632	0.009
69	Han et al, 2019	29.3333	120.533	1409	15.5042	nitrogen deposition	100	-0.709	0.021
70	Han et al, 2019	29.3667	120.567	1396	15.5	nitrogen deposition	100	-0.376	0.019
71	Han et al, 2019	29.3833	120.583	1375	15.7167	nitrogen deposition	200	-0.466	0.033
72	Lib et al, 2019	43.6833	125.433	645.3	4.7	nitrogen deposition	150			-0.005	0
73	Lib et al, 2019	43.6833	125.433	645.3	4.7	nitrogen deposition	100			0.035	0.001
74	Lib et al, 2019	43.6833	125.433	645.3	4.7	nitrogen deposition	150			0.014	0.001
75	Lib et al, 2019	43.6833	125.433	645.3	4.7	nitrogen deposition	100			0.102	0
76	Lib et al, 2019	43.6833	125.433	645.3	4.7	nitrogen deposition	50			0.094	0
77	Lib et al, 2019	43.6833	125.433	645.3	4.7	nitrogen deposition	50			0.119	0
78	Luo et al, 2019	30.4778	114.352	1265	17.0708	nitrogen deposition	22.5	0.419	0.009
79	Luo et al, 2020	30.4778	114.352	1265	17.0708	nitrogen deposition	50	0.322	40.556
80	Tafazoli et al, 2019	36.5167	53.2667	733	18	nitrogen deposition	50			0.035	0.007
81	Tafazoli et al, 2019	36.5167	53.2667	733	18	nitrogen deposition	100			-0.023	0.011
82	Wang et al, 2019	21.45	110.9	1550	23	nitrogen deposition	100	0.129	0.009
83	Wu et al, 2019	23.3333	113.5	1750	21.5	nitrogen deposition	150	-2.596	0.019
84	Wu et al, 2019	23.3333	113.5	1750	21.5	nitrogen deposition	100	0.222	0.002
85	Wu et al, 2019	23.3333	113.5	1750	21.5	nitrogen deposition	150	-0.067	0.003
86	Wu et al, 2019	23.3333	113.5	1750	21.5	nitrogen deposition	150	0.153	0.003
87	Wu et al, 2019	23.3333	113.5	1750	21.5	nitrogen deposition	100	-1.246	0.03
88	Wu et al, 2019	23.3333	113.5	1750	21.5	nitrogen deposition	100	-0.546	0.045
89	Wu et al, 2019	23.3333	113.5	1750	21.5	nitrogen deposition	150	-0.093	0.007
90	Wu et al, 2019	23.3333	113.5	1750	21.5	nitrogen deposition	100	-0.012	0.001
91	Wu et al, 2019	23.3333	113.5	1750	21.5	nitrogen deposition	150	1.078	0.098
92	Wu et al, 2019	23.3333	113.5	1750	21.5	nitrogen deposition	150	0.559	0.007
93	Wu et al, 2019	23.3333	113.5	1750	21.5	nitrogen deposition	100	0.59	0.006
94	Wu et al, 2019	23.3333	113.5	1750	21.5	nitrogen deposition	100	-0.071	0.016
95	Wu et al, 2019	23.3333	113.5	1750	21.5	nitrogen deposition	150	-0.079	0.013
96	Wu et al, 2019	23.3333	113.5	1750	21.5	nitrogen deposition	100	0.394	0.009
97	Wu et al, 2019	23.3333	113.5	1750	21.5	nitrogen deposition	150	0.543	0.007
98	Wu et al, 2019	23.3333	113.5	1750	21.5	nitrogen deposition	100	0.58	0.007
99	Yan et al, 2019	42.4	128.1	750	3.2	nitrogen deposition	50			0.038	0.007
100	Yan et al, 2019	42.4	128.1	750	3.2	nitrogen deposition	50			0.044	0.014
101	Yan et al, 2019	42.4	128.1	750	3.2	nitrogen deposition	50			-0.01	0.021
102	Zhanga et al, 2019	30.2084	120.212	1490	14.8	nitrogen deposition	80	0.841	0.04
103	Zhanga et al, 2019	30.2084	120.212	1490	14.8	nitrogen deposition	80	0.623	0.046
104	Zhanga et al, 2019	30.2084	120.212	1490	14.8	nitrogen deposition	200	-0.201	0.03
105	Zhanga et al, 2019	30.2084	120.212	1490	14.8	nitrogen deposition	200	0.623	0.034
106	Zhanga et al, 2019	30.2084	120.212	1490	14.8	nitrogen deposition	200	0.693	0.109
107	Zhanga et al, 2019	30.2084	120.212	1490	14.8	nitrogen deposition	200	-0.105	0.048
108	Zhanga et al, 2019	30.2084	120.212	1490	14.8	nitrogen deposition	80	0.588	0.116
109	Zhanga et al, 2019	30.2084	120.212	1490	14.8	nitrogen deposition	80	0.182	0.089
110	Zhangb et al, 2019	29.16	119.79	1450	17.3	nitrogen deposition	25	0.105	0.011
111	Zhangb et al, 2019	29.16	119.79	1450	17.3	nitrogen deposition	50	-0.097	0.018
112	Zhangb et al, 2019	29.16	119.79	1450	17.3	nitrogen deposition	50	0.305	0.01
113	Zhangb et al, 2019	29.16	119.79	1450	17.3	nitrogen deposition	25	0.121	0.027
114	Chang et al, 2019	27.5	114.5	1590.9	16.8	nitrogen deposition	60	1.758	0.093
115	Chang et al, 2019	27.5	114.5	1590.9	16.8	nitrogen deposition	60	1.442	0.034
116	Chang et al, 2019	27.5	114.5	1590.9	16.8	nitrogen deposition	60	0.951	0.04
117	Cui et al, 2019	42.9333	128.283	1050	-2	nitrogen deposition	30	0.093	0.011
118	Cui et al, 2019	42.9333	128.283	1050	-2	nitrogen deposition	30	0.008	0.053
119	Cui et al, 2019	42.9333	128.283	1050	-2	nitrogen deposition	120	-0.05	0.079
120	Cui et al, 2019	42.9333	128.283	1050	-2	nitrogen deposition	120	0.051	0.021
121	Feng et al, 2019	22.95	114.3	2035	20.8	nitrogen deposition	50			0	0
122	Feng et al, 2019	22.95	114.3	2035	20.8	nitrogen deposition	50			0	0.001
123	Feng et al, 2019	22.95	114.3	2035	20.8	nitrogen deposition	50			0.041	0.001
124	Feng et al, 2019	22.95	114.3	2035	20.8	nitrogen deposition	50			0.042	0.001
125	Xie et al, 2019	18.3333	108.683	2449	19.8	nitrogen deposition	300	-0.634	0.01
126	Xie et al, 2019	18.3333	108.683	2449	19.8	nitrogen deposition	75	0.106	0.003
127	Xie et al, 2019	18.3333	108.683	2449	19.8	nitrogen deposition	150	-0.014	0.02
128	Xie et al, 2019	18.3333	108.683	2449	19.8	nitrogen deposition	150	-0.042	0.006
129	Xie et al, 2019	18.3333	108.683	2449	19.8	nitrogen deposition	75	-0.046	0.004
130	Xie et al, 2019	18.3333	108.683	2449	19.8	nitrogen deposition	600	-1.218	0.017
131	Xie et al, 2019	18.3333	108.683	2449	19.8	nitrogen deposition	75	-0.029	0.027
132	Xie et al, 2019	18.3333	108.683	2449	19.8	nitrogen deposition	300	-0.331	0.021
133	Xie et al, 2019	18.3333	108.683	2449	19.8	nitrogen deposition	150	-0.514	0.013
134	Xie et al, 2019	18.3333	108.683	2449	19.8	nitrogen deposition	300	-0.934	0.006
135	Xie et al, 2019	18.3333	108.683	2449	19.8	nitrogen deposition	600	-1.005	0.028
136	Xie et al, 2019	18.3333	108.683	2449	19.8	nitrogen deposition	600	-2.773	0.056
137	Li et al, 2019	42.9667	122.35	450	6	nitrogen deposition	200			0.228	0.008
138	Li et al, 2019	42.9667	122.35	450	6	nitrogen deposition	200			0.141	0.022
139	Pei et al, 2019	33.7858	111.616	758	13.0542	nitrogen deposition	20	0.233	0.001
140	Pei et al, 2019	33.7858	111.616	758	13.0542	nitrogen deposition	40	0.339	0.002
141	Pei et al, 2019	33.7858	111.616	758	13.0542	nitrogen deposition	120	1.194	0.002
142	Pei et al, 2019	33.7858	111.616	758	13.0542	nitrogen deposition	80	0.738	0.001
143	Pei et al, 2019	33.7858	111.616	758	13.0542	nitrogen deposition	180	1.398	0.005
144	Zhu et al, 2019	32.8	120.817	1051	14.6	nitrogen deposition	100			0.442	0.003
145	Zhu et al, 2019	32.8	120.817	1051	14.6	nitrogen deposition	150			-0.017	0.004
146	Zhu et al, 2019	32.8	120.817	1051	14.6	nitrogen deposition	50			0.375	0.002
147	Zhu et al, 2019	32.8	120.817	1051	14.6	nitrogen deposition	300			0.332	0.003
148	Lib et al, 2018	36.4333	117.45	700	13	nitrogen deposition	60	0.158	0.038
149	Lib et al, 2018	36.4333	117.45	700	13	nitrogen deposition	120	-0.126	0.017
150	Lib et al, 2018	36.4333	117.45	700	13	nitrogen deposition	120	0.028	0.069
151	Lib et al, 2018	36.4333	117.45	700	13	nitrogen deposition	60	-0.132	0.02
152	Liu et al, 2018	34.2773	108.085	674.3	13.2	nitrogen deposition	28			0.017	0.001
153	Liu et al, 2018	34.2773	108.085	674.3	13.2	nitrogen deposition	56			0.072	0.001
154	Liu et al, 2018	34.2773	108.085	674.3	13.2	nitrogen deposition	112			-0.029	0.001
155	Liu et al, 2018	34.2773	108.085	674.3	13.2	nitrogen deposition	448			0.067	0.001
156	Liu et al, 2018	34.2773	108.085	674.3	13.2	nitrogen deposition	224			-0.035	0.001
157	Liu et al, 2018	34.2773	108.085	674.3	13.2	nitrogen deposition	56			-0.119	0.001
158	Liu et al, 2018	34.2773	108.085	674.3	13.2	nitrogen deposition	448			0.028	0.001
159	Liu et al, 2018	34.2773	108.085	674.3	13.2	nitrogen deposition	112			0.009	0.001
160	Liu et al, 2018	34.2773	108.085	674.3	13.2	nitrogen deposition	28			-0.048	0.001
161	Liu et al, 2018	34.2773	108.085	674.3	13.2	nitrogen deposition	224			0	0.001
162	Ma et al, 2018	36.6667	111.983	625	8.7	nitrogen deposition	50			0.028	0.025
163	Ma et al, 2018	36.6667	111.983	625	8.7	nitrogen deposition	100			0.054	0.008
164	Ma et al, 2018	36.6667	111.983	625	8.7	nitrogen deposition	50			0.248	0.016
165	Ma et al, 2018	36.6667	111.983	625	8.7	nitrogen deposition	150			-0.214	0.042
166	Ma et al, 2018	36.6667	111.983	625	8.7	nitrogen deposition	150			0.244	0.016
167	Ma et al, 2018	36.6667	111.983	625	8.7	nitrogen deposition	100			0.356	0.021
168	Mab et al, 2018	26.7333	115.067	1471.2	17.9	nitrogen deposition	50			0.068	0.002
169	Mab et al, 2018	26.7333	115.067	1471.2	17.9	nitrogen deposition	100			0.301	0.002
170	Wanga et al, 2018	42.4	128.083	695	3.6	nitrogen deposition	60			-0.127	0.001
171	Wanga et al, 2018	42.4	128.083	695	3.6	nitrogen deposition	100			-0.087	0.002
172	Wanga et al, 2018	42.4	128.083	695	3.6	nitrogen deposition	20			-0.075	0.001
173	Wanga et al, 2018	42.4	128.083	695	3.6	nitrogen deposition	80			-0.107	0.002
174	Wanga et al, 2018	42.4	128.083	695	3.6	nitrogen deposition	40			-0.075	0.002
175	Wanga et al, 2018	42.4	128.083	695	3.6	nitrogen deposition	120			0.063	0.002
176	Wangb et al, 2018	36.4333	117.45	700	13	nitrogen deposition	15	0.26	0.022
177	Wangb et al, 2018	36.4333	117.45	700	13	nitrogen deposition	29	0.208	0.017
178	Wangb et al, 2018	36.4333	117.45	700	13	nitrogen deposition	114	0.134	0.023
179	Wangb et al, 2018	36.4333	117.45	700	13	nitrogen deposition	59	0.143	0.022
180	Wangb et al, 2018	36.4333	117.45	700	13	nitrogen deposition	114	0.995	0.009
181	Wangb et al, 2018	36.4333	117.45	700	13	nitrogen deposition	59	0.756	0.012
182	Wangb et al, 2018	36.4333	117.45	700	13	nitrogen deposition	59	0.475	0.018
183	Wangb et al, 2018	36.4333	117.45	700	13	nitrogen deposition	15	0.038	0.016
184	Wangb et al, 2018	36.4333	117.45	700	13	nitrogen deposition	29	0.523	0.037
185	Wangb et al, 2018	36.4333	117.45	700	13	nitrogen deposition	114	1.066	0.011
186	Wangb et al, 2018	36.4333	117.45	700	13	nitrogen deposition	29	0.644	0.017
187	Wangb et al, 2018	36.4333	117.45	700	13	nitrogen deposition	15	0.498	0.015
188	Yang et al, 2018	45.35	127.5	700	2.8	nitrogen deposition	100			0.054	0.013
189	Yang et al, 2018	45.35	127.5	700	2.8	nitrogen deposition	100			-0.048	0.075
190	Zhao et al, 2018	36.5167	112.017	662	9.9	nitrogen deposition	50			-0.274	0.045
191	Zhao et al, 2018	36.5167	112.017	662	9.9	nitrogen deposition	100			-0.203	0.036
192	Zhao et al, 2018	36.5167	112.017	662	9.9	nitrogen deposition	150			-0.325	0.058
193	Zhou et al, 2018	30.1333	116.633	1407	17	nitrogen deposition	60			-0.041	0.003
194	Zhou et al, 2018	30.1333	116.633	1407	17	nitrogen deposition	30			0.057	0.004
195	Zhou et al, 2018	30.1333	116.633	1407	17	nitrogen deposition	60			-0.063	0.005
196	Zhou et al, 2018	30.1333	116.633	1407	17	nitrogen deposition	30			-0.078	0.001
197	Chen et al, 2018	35.05	108.167	587.6	10	nitrogen deposition	50			0.088	0
198	Chen et al, 2018	35.05	108.167	587.6	10	nitrogen deposition	200			-0.093	0.001
199	Chen et al, 2018	35.05	108.167	587.6	10	nitrogen deposition	100			-0.079	0
200	Chen et al, 2018	35.05	108.167	587.6	10	nitrogen deposition	200			0.112	0.001
201	Chen et al, 2018	35.05	108.167	587.6	10	nitrogen deposition	100			0.04	0
202	Chen et al, 2018	35.05	108.167	587.6	10	nitrogen deposition	50			-0.139	0.001
203	Chen et al, 2018	35.05	108.167	587.6	10	nitrogen deposition	50			0.029	0.001
204	Chen et al, 2018	35.05	108.167	587.6	10	nitrogen deposition	200			-0.03	0.004
205	Chen et al, 2018	35.05	108.167	587.6	10	nitrogen deposition	100			-0.054	0.003
206	Dong et al, 2018	26.8667	115.217	1471.2	17.9	nitrogen deposition	50			-0.147	0.003
207	Dong et al, 2018	26.8667	115.217	1471.2	17.9	nitrogen deposition	100			-0.027	0.005
208	Lei et al, 2018	26.5	117.717	1628	19.6	nitrogen deposition	25			-0.283	0.042
209	Lei et al, 2018	26.5	117.717	1628	19.6	nitrogen deposition	25			-0.292	0.032
210	Lib et al, 2019	35.65	110.1	574.4	9.8	nitrogen deposition	90			0.273	0.001
211	Lib et al, 2019	35.65	110.1	574.4	9.8	nitrogen deposition	30			0.056	0.002
212	Lib et al, 2019	35.65	110.1	574.4	9.8	nitrogen deposition	60			0.251	0.002
213	Lib et al, 2019	35.65	110.1	574.4	9.8	nitrogen deposition	90			0.051	0.003
214	Lib et al, 2019	35.65	110.1	574.4	9.8	nitrogen deposition	60			0.216	0.003
215	Lib et al, 2019	35.65	110.1	574.4	9.8	nitrogen deposition	30			0.277	0.003
216	Xu et al, 2018	22.2167	107.75	1304.2	21.6	nitrogen deposition	30	0.254	0.003
217	Xu et al, 2018	22.2167	107.75	1304.2	21.6	nitrogen deposition	60	1.016	0.003
218	Xu et al, 2018	22.2167	107.75	1304.2	21.6	nitrogen deposition	30	0.244	0.001
219	Xu et al, 2018	22.2167	107.75	1304.2	21.6	nitrogen deposition	60	0.632	0.003
220	Lia et al, 2017	36.4333	117.45	700	13	nitrogen deposition	150	0.304	0.011
221	Lia et al, 2017	36.4333	117.45	700	13	nitrogen deposition	50	0.126	0.016
222	Liu et al, 2017	23.3333	113.5	1750	21.5	nitrogen deposition	150	0.5	0.003
223	Liu et al, 2017	23.3333	113.5	1750	21.5	nitrogen deposition	150	-1.557	0.008
224	Liu et al, 2017	23.3333	113.5	1750	21.5	nitrogen deposition	100	-0.955	0.013
225	Liu et al, 2017	23.3333	113.5	1750	21.5	nitrogen deposition	100	0.421	0.002
226	Liu et al, 2017	23.3333	113.5	1750	21.5	nitrogen deposition	100	0.347	0.004
227	Liu et al, 2017	23.3333	113.5	1750	21.5	nitrogen deposition	150	-0.054	0.001
228	Liu et al, 2017	23.3333	113.5	1750	21.5	nitrogen deposition	100	0.203	0.001
229	Liu et al, 2017	23.3333	113.5	1750	21.5	nitrogen deposition	150	-0.087	0.004
230	Song et al, 2017	47.1667	128.883	676	-0.3	nitrogen deposition	80			0.019	0.013
231	Song et al, 2017	47.1667	128.883	676	-0.3	nitrogen deposition	20			-0.094	0.012
232	Song et al, 2017	47.1667	128.883	676	-0.3	nitrogen deposition	40			-0.158	0.022
233	Zhang et al, 2017	30.2333	119.7	1613.9	15.6	nitrogen deposition	30			-0.006	0
234	Zhang et al, 2017	30.2333	119.7	1613.9	15.6	nitrogen deposition	60			-0.025	0
235	Zhu et al, 2017	36.7833	112	770	6.2	nitrogen deposition	150			0	0
236	Zhu et al, 2017	36.7833	112	770	6.2	nitrogen deposition	50			-0.01	0
237	Zhu et al, 2017	36.7833	112	770	6.2	nitrogen deposition	100			-0.005	0
238	Han et al, 2017	29.4667	94.3667	654	8.5	nitrogen deposition	50			-0.697	0
239	Han et al, 2017	29.4667	94.3667	654	8.5	nitrogen deposition	150			-0.029	0
240	Han et al, 2017	29.4667	94.3667	654	8.5	nitrogen deposition	25			0.362	0
241	Liu et al, 2007	45.3333	127.567	700	2.7	nitrogen deposition	100			0.023	0.002
242	Liu et al, 2007	45.3333	127.567	700	2.7	nitrogen deposition	100			0.032	0.002
243	Liu et al, 2007	45.3333	127.567	700	2.7	nitrogen deposition	100			0.118	0.003
244	Wang et al, 2017	25.2564	110.272	1840	19.4875	nitrogen deposition	10	0.01	0
245	Wang et al, 2017	25.2564	110.272	1840	19.4875	nitrogen deposition	40	-0.03	0
246	Wang et al, 2017	25.2564	110.272	1840	19.4875	nitrogen deposition	60	0.216	0
247	Wang et al, 2017	25.2564	110.272	1840	19.4875	nitrogen deposition	20	0.057	0
248	Wang et al, 2017	25.2564	110.272	1840	19.4875	nitrogen deposition	40	0.421	0
249	Wang et al, 2017	25.2564	110.272	1840	19.4875	nitrogen deposition	10	0.156	0
250	Wang et al, 2017	25.2564	110.272	1840	19.4875	nitrogen deposition	60	-0.17	0.001
251	Wang et al, 2017	25.2564	110.272	1840	19.4875	nitrogen deposition	10	0.172	0
252	Wang et al, 2017	25.2564	110.272	1840	19.4875	nitrogen deposition	20	0.354	0
253	Wang et al, 2017	25.2564	110.272	1840	19.4875	nitrogen deposition	20	0.389	0
254	Wang et al, 2017	25.2564	110.272	1840	19.4875	nitrogen deposition	40	0.4	0
255	Wang et al, 2017	25.2564	110.272	1840	19.4875	nitrogen deposition	60	0.502	0
256	Yao et al, 2017	35.65	110.1	584.4	9.7	nitrogen deposition	90			0.106	0.003
257	Yao et al, 2017	35.65	110.1	584.4	9.7	nitrogen deposition	30			0.044	0.004
258	Yao et al, 2017	35.65	110.1	584.4	9.7	nitrogen deposition	60			0.165	0.003
259	Zhang et al, 2017	26.7	115.067	1600	17.9	nitrogen deposition	50			-0.136	0.007
260	Zhang et al, 2017	26.7	115.067	1600	17.9	nitrogen deposition	100			-0.104	0.006
261	Zhang et al, 2017	26.7	115.067	1600	17.9	nitrogen deposition	100			0.061	0.002
262	Zhang et al, 2017	26.7	115.067	1600	17.9	nitrogen deposition	50			0.147	0.002
263	Zhang et al, 2017	26.7	115.067	1600	17.9	nitrogen deposition	100			-0.09	0.005
264	Zhang et al, 2017	26.7	115.067	1600	17.9	nitrogen deposition	50			-0.076	0.005
265	Zhou et al, 2017	26.1833	117.467	1700	19.4	nitrogen deposition	40			0.069	0.038
266	Zhou et al, 2017	26.2	117.483	1700	19.4	nitrogen deposition	80			-0.094	0.025
267	Zhou et al, 2017	26.2333	117.517	1700	19.4	nitrogen deposition	80			0.085	0.005
268	Zhou et al, 2017	26.2167	117.5	1700	19.4	nitrogen deposition	40			0.124	0.009
269	Li et al, 2016	41.85	124.9	810.9	4.7	nitrogen deposition	138	0.558	0
270	Li et al, 2016	41.85	124.9	810.9	4.7	nitrogen deposition	138	0.207	0.001
271	Wangb et al, 2016	36.3	111.75	548	9.9	nitrogen deposition	50			-0.029	0.009
272	Wangb et al, 2016	36.3	111.75	548	9.9	nitrogen deposition	100			-0.027	0.009
273	Wangb et al, 2016	36.3	111.75	548	9.9	nitrogen deposition	150			0.015	0.008
274	Zhu et al, 2016	22.5667	112.833	1543	22.5	nitrogen deposition	100			-0.021	0.005
275	Zhu et al, 2016	22.5667	112.833	1543	22.5	nitrogen deposition	50			-0.052	0.009
276	Zhu et al, 2016	22.5667	112.833	1543	22.5	nitrogen deposition	100			0.16	0.007
277	Zhu et al, 2016	22.5667	112.833	1543	22.5	nitrogen deposition	50			0.058	0.007
278	Huang et al, 2016	23.3333	113.5	1700	21.3542	nitrogen deposition	100			0.074	0.001
279	Huang et al, 2016	23.3333	113.5	1700	21.3542	nitrogen deposition	150			0.077	0.001
280	Huang et al, 2016	23.3333	113.5	1700	21.3542	nitrogen deposition	100			0.16	0.005
281	Huang et al, 2016	23.3333	113.5	1700	21.3542	nitrogen deposition	100			0.115	0.002
282	Huang et al, 2016	23.3333	113.5	1700	21.3542	nitrogen deposition	100			0.049	0.001
283	Huang et al, 2016	23.3333	113.5	1700	21.3542	nitrogen deposition	100			0.012	0.001
284	Huang et al, 2016	23.3333	113.5	1700	21.3542	nitrogen deposition	100			0.021	0.003
285	Huang et al, 2016	23.3333	113.5	1700	21.3542	nitrogen deposition	150			0.098	0.003
286	Huang et al, 2016	23.3333	113.5	1700	21.3542	nitrogen deposition	150			0.069	0.001
287	Huang et al, 2016	23.3333	113.5	1700	21.3542	nitrogen deposition	150			-0.015	0.008
288	Huang et al, 2016	23.3333	113.5	1700	21.3542	nitrogen deposition	150			-0.046	0.003
289	Huang et al, 2016	23.3333	113.5	1700	21.3542	nitrogen deposition	100			-0.009	0.001
290	Huang et al, 2016	23.3333	113.5	1700	21.3542	nitrogen deposition	100			0.259	0.008
291	Huang et al, 2016	23.3333	113.5	1700	21.3542	nitrogen deposition	150			-0.068	0.005
292	Huang et al, 2016	23.3333	113.5	1700	21.3542	nitrogen deposition	150			0.037	0.008
293	Huang et al, 2016	23.3333	113.5	1700	21.3542	nitrogen deposition	150			-0.002	0.005
294	Wang et al, 2016	30.5167	114.483	1300	16.7	nitrogen deposition	50	0.068	0.012
295	Wang et al, 2016	30.5167	114.483	1300	16.7	nitrogen deposition	150	0.468	0.017
296	Wang et al, 2016	30.5167	114.483	1300	16.7	nitrogen deposition	50	0.652	0.014
297	Wang et al, 2016	30.5167	114.483	1300	16.7	nitrogen deposition	150	0.386	0.013
298	Wang et al, 2016	30.5167	114.483	1300	16.7	nitrogen deposition	50	0.164	0.002
299	Wang et al, 2016	30.5167	114.483	1300	16.7	nitrogen deposition	50	0.041	0.004
300	Wang et al, 2016	30.5167	114.483	1300	16.7	nitrogen deposition	300	0.797	0.01
301	Wang et al, 2016	30.5167	114.483	1300	16.7	nitrogen deposition	300	0.775	0.019
302	Wang et al, 2016	30.5167	114.483	1300	16.7	nitrogen deposition	150	0.396	0.005
303	Wang et al, 2016	30.5167	114.483	1300	16.7	nitrogen deposition	150	0.402	0.004
304	Wang et al, 2016	30.5167	114.483	1300	16.7	nitrogen deposition	150	0.124	0.004
305	Wang et al, 2016	30.5167	114.483	1300	16.7	nitrogen deposition	50	0.176	0.005
306	Wang et al, 2016	30.5167	114.483	1300	16.7	nitrogen deposition	300	0.645	0.003
307	Wang et al, 2016	30.5167	114.483	1300	16.7	nitrogen deposition	300	0.161	0.006
308	Wang et al, 2016	30.5167	114.483	1300	16.7	nitrogen deposition	300	0.66	0.003
309	Zhao et al, 2016	42.9667	122.35	450	6.4	nitrogen deposition	100			0.058	0.009
310	Zhao et al, 2016	42.9667	122.35	450	6.4	nitrogen deposition	100			0.203	0.007
311	Dong et al, 2015	26.7333	115.067	1471.2	17.9	nitrogen deposition	50			0.118	0.001
312	Dong et al, 2015	26.7333	115.067	1471.2	17.9	nitrogen deposition	50			0.026	0.001
313	Dong et al, 2015	26.7333	115.067	1471.2	17.9	nitrogen deposition	100			0.178	0.003
314	Dong et al, 2015	26.7333	115.067	1471.2	17.9	nitrogen deposition	100			0.119	0.004
315	Liu et al, 2015	23.16	113.35	1700	21.5	nitrogen deposition	200	-0.316	0.013
316	Liu et al, 2015	23.16	113.35	1700	21.5	nitrogen deposition	100	-1.641	0.007
317	Liu et al, 2015	23.16	113.35	1700	21.5	nitrogen deposition	100	-0.081	0.004
318	Liu et al, 2015	23.16	113.35	1700	21.5	nitrogen deposition	100	0.503	0.004
319	Liu et al, 2015	23.16	113.35	1700	21.5	nitrogen deposition	100	-0.968	0.011
320	Liu et al, 2015	23.16	113.35	1700	21.5	nitrogen deposition	100	0.447	0.002
321	Liu et al, 2015	23.16	113.35	1700	21.5	nitrogen deposition	200	0.82	0.029
322	Liu et al, 2015	23.16	113.35	1700	21.5	nitrogen deposition	100	0.359	0.004
323	Liu et al, 2015	23.16	113.35	1700	21.5	nitrogen deposition	200	-0.075	0.006
324	Liu et al, 2015	23.16	113.35	1700	21.5	nitrogen deposition	100	-0.037	0.001
325	Liu et al, 2015	23.16	113.35	1700	21.5	nitrogen deposition	100	0.204	0.001
326	Liu et al, 2015	23.16	113.35	1700	21.5	nitrogen deposition	200	-0.017	0
327	Liu et al, 2015	23.16	113.35	1700	21.5	nitrogen deposition	200	0.475	0.003
328	Liu et al, 2015	23.16	113.35	1700	21.5	nitrogen deposition	200	0.12	0.002
329	Liu et al, 2015	23.16	113.35	1700	21.5	nitrogen deposition	200	-0.058	0.008
330	Liu et al, 2015	23.16	113.35	1700	21.5	nitrogen deposition	200	0.506	0.003
331	Tanis et al, 2015	42.6667	-84.45	245	-3.09583	nitrogen deposition	66	0.279	0.045
332	Tanis et al, 2015	42.6667	-84.45	245	-3.09583	nitrogen deposition	66	-0.022	0.024
333	Tanis et al, 2015	42.6667	-84.45	245	-3.09583	nitrogen deposition	66	0.201	0.163
334	Xu et al, 2015	36.4333	117.45	700	13	nitrogen deposition	200	-0.131	0.034
335	Xu et al, 2015	36.4333	117.45	700	13	nitrogen deposition	200	0	0.021
336	Xu et al, 2015	36.4333	117.45	700	13	nitrogen deposition	80	0.151	0.04
337	Xu et al, 2015	36.4333	117.45	700	13	nitrogen deposition	40	0.102	0.022
338	Xu et al, 2015	36.4333	117.45	700	13	nitrogen deposition	80	0.292	0.037
339	Xu et al, 2015	36.4333	117.45	700	13	nitrogen deposition	40	0.059	0.033
340	Zheng et al, 2015	23.15	112.5	1927	21	nitrogen deposition	150			0.173	0.01
341	Liu et al, 2015	36.3	111.75	662	8.6	nitrogen deposition	100			0.231	0.007
342	Liu et al, 2015	36.3	111.75	662	8.6	nitrogen deposition	150			0.121	0.009
343	Liu et al, 2015	36.3	111.75	662	8.6	nitrogen deposition	50			0.223	0.008
344	Liu et al, 2015	36.3	111.75	662	8.6	nitrogen deposition	150			0.234	0.007
345	Liu et al, 2015	36.3	111.75	662	8.6	nitrogen deposition	50			0.096	0.009
346	Liu et al, 2015	36.3	111.75	662	8.6	nitrogen deposition	100			0.174	0.009
347	Guo et al, 2014	36.4333	117.45	700	13	nitrogen deposition	60	0.632	0.113
348	Guo et al, 2014	36.4333	117.45	700	13	nitrogen deposition	30	0.496	0.098
349	Guo et al, 2014	36.4333	117.45	700	13	nitrogen deposition	100	0.967	0.151
350	Guo et al, 2014	36.4333	117.45	700	13	nitrogen deposition	200	-0.036	0.098
351	Luo et al, 2014	36.4333	117.45	700	13	nitrogen deposition	60	-0.162	0.083
352	Luo et al, 2014	36.4333	117.45	700	13	nitrogen deposition	30	0.19	0.066
353	Luo et al, 2014	36.4333	117.45	700	13	nitrogen deposition	120	0.072	0.055
354	Luo et al, 2014	36.4333	117.45	700	13	nitrogen deposition	60	0.041	0.021
355	Luo et al, 2014	36.4333	117.45	700	13	nitrogen deposition	120	-0.345	0.021
356	Luo et al, 2014	36.4333	117.45	700	13	nitrogen deposition	30	-0.087	0.04
357	Rodriguez et al, 2014	42.1167	-74.25	153	4.3	nitrogen deposition	50			0.202	0.018
358	Rodriguez et al, 2014	42.1167	-74.25	153	4.3	nitrogen deposition	50			-0.028	0.007
359	Rodriguez et al, 2014	42.1167	-74.25	153	4.3	nitrogen deposition	50			-0.144	0.071
360	Rodriguez et al, 2014	42.1167	-74.25	153	4.3	nitrogen deposition	50			0.323	0.075
361	Rodriguez et al, 2014	42.1167	-74.25	153	4.3	nitrogen deposition	50			0.061	0.177
362	Rodriguez et al, 2014	42.1167	-74.25	153	4.3	nitrogen deposition	50			0.126	0.006
363	Rodriguez et al, 2014	42.1167	-74.25	153	4.3	nitrogen deposition	50			0.159	0.016
364	Rodriguez et al, 2014	42.1167	-74.25	153	4.3	nitrogen deposition	50			0.048	0.023
365	Rodriguez et al, 2014	42.1167	-74.25	153	4.3	nitrogen deposition	50			0.148	0.014
366	Rodriguez et al, 2014	42.1167	-74.25	153	4.3	nitrogen deposition	50			0.153	0.034
367	Tripathi et al, 2014	25.3	83.05	1040	26.4417	nitrogen deposition	120	0.68	0.001
368	Tripathi et al, 2014	25.3	83.05	1040	26.4417	nitrogen deposition	60	0.693	0.001
369	Tripathi et al, 2014	25.3	83.05	1040	26.4417	nitrogen deposition	120	0.952	0.004
370	Tripathi et al, 2014	25.3	83.05	1040	26.4417	nitrogen deposition	120	0.799	0.002
371	Tripathi et al, 2014	25.3	83.05	1040	26.4417	nitrogen deposition	120	0.787	0.003
372	Tripathi et al, 2014	25.3	83.05	1040	26.4417	nitrogen deposition	30	0.392	0.003
373	Tripathi et al, 2014	25.3	83.05	1040	26.4417	nitrogen deposition	60	0.779	0.003
374	Tripathi et al, 2014	25.3	83.05	1040	26.4417	nitrogen deposition	60	0.887	0.004
375	Tripathi et al, 2014	25.3	83.05	1040	26.4417	nitrogen deposition	60	0.648	0.003
376	Tripathi et al, 2014	25.3	83.05	1040	26.4417	nitrogen deposition	30	0.411	0.003
377	Tripathi et al, 2014	25.3	83.05	1040	26.4417	nitrogen deposition	30	0.368	0.003
378	Tripathi et al, 2014	25.3	83.05	1040	26.4417	nitrogen deposition	120	0.534	0.001
379	Tripathi et al, 2014	25.3	83.05	1040	26.4417	nitrogen deposition	60	0.437	0.001
380	Tripathi et al, 2014	25.3	83.05	1040	26.4417	nitrogen deposition	30	0.619	0.004
381	Tripathi et al, 2014	25.3	83.05	1040	26.4417	nitrogen deposition	30	0.251	0.001
382	Wang et al, 2014	30.5	114.483	1300	16.7	nitrogen deposition	50	0.103	0.013
383	Wang et al, 2014	30.5	114.483	1300	16.7	nitrogen deposition	150	-0.13	0.003
384	Wang et al, 2014	30.5	114.483	1300	16.7	nitrogen deposition	50	0.42	0.006
385	Wang et al, 2014	30.5	114.483	1300	16.7	nitrogen deposition	300	-0.201	0.028
386	Wang et al, 2014	30.5	114.483	1300	16.7	nitrogen deposition	150	0.399	0.011
387	Wang et al, 2014	30.5	114.483	1300	16.7	nitrogen deposition	150	0.692	0.016
388	Wang et al, 2014	30.5	114.483	1300	16.7	nitrogen deposition	150	0.087	0.002
389	Wang et al, 2014	30.5	114.483	1300	16.7	nitrogen deposition	300	0.633	0.042
390	Wang et al, 2014	30.5	114.483	1300	16.7	nitrogen deposition	50	0.103	0.003
391	Wang et al, 2014	30.5	114.483	1300	16.7	nitrogen deposition	300	-0.323	0.007
392	Wang et al, 2014	30.5	114.483	1300	16.7	nitrogen deposition	300	-0.229	0.004
393	Wang et al, 2014	30.5	114.483	1300	16.7	nitrogen deposition	50	0.07	0.008
394	Wang et al, 2014	30.5	114.483	1300	16.7	nitrogen deposition	50	0.173	0.005
395	Wang et al, 2014	30.5	114.483	1300	16.7	nitrogen deposition	300	-0.002	0.004
396	Wang et al, 2014	30.5	114.483	1300	16.7	nitrogen deposition	150	0.357	0.004
397	Zhang et al, 2014	22.5667	112.833	1295	21.7	nitrogen deposition	50			0.211	0.011
398	Zhang et al, 2014	22.5667	112.83	1295	21.7	nitrogen deposition	100			0.324	0.008
399	Zhang et al, 2014	22.5667	112.833	1295	21.7	nitrogen deposition	50			-0.069	0.003
400	Zhang et al, 2014	22.5667	112.833	1295	21.7	nitrogen deposition	100			-0.219	0.005
401	Zhao et al, 2014	31.6833	103.883	919.5	8.9	nitrogen deposition	250			-0.05	0
402	Zhao et al, 2014	31.6833	103.883	919.5	8.9	nitrogen deposition	250			0.136	0.001
403	Liu et al, 2014	47.1667	128.883	676	-0.3	nitrogen deposition	120			-0.433	0.032
404	Liu et al, 2014	47.1667	128.883	676	-0.3	nitrogen deposition	120			0.198	0.012
405	Liu et al, 2014	47.1667	128.883	676	-0.3	nitrogen deposition	30			0.707	0.019
406	Liu et al, 2014	47.1667	128.883	676	-0.3	nitrogen deposition	60			0.359	0.024
407	Liu et al, 2014	47.1667	128.883	676	-0.3	nitrogen deposition	60			0.269	0.013
408	Liu et al, 2014	47.1667	128.883	676	-0.3	nitrogen deposition	120			-0.064	0.006
409	Liu et al, 2014	47.1667	128.883	676	-0.3	nitrogen deposition	60			0.06	0.006
410	Liu et al, 2014	47.1667	128.883	676	-0.3	nitrogen deposition	30			0.211	0.014
411	Liu et al, 2014	47.1667	128.883	676	-0.3	nitrogen deposition	60			0.172	0.017
412	Liu et al, 2014	47.1667	128.883	676	-0.3	nitrogen deposition	30			0.336	0.016
413	Liu et al, 2014	47.1667	128.883	676	-0.3	nitrogen deposition	120			-0.01	0.02
414	Liu et al, 2014	47.1667	128.883	676	-0.3	nitrogen deposition	30			-0.038	0.008
415	Xu et al, 2014	32.8667	120.817	1050	14.6	nitrogen deposition	150			0.004	0
416	Xu et al, 2014	32.8667	120.817	1050	14.6	nitrogen deposition	150			0	0
417	Xu et al, 2014	32.8667	120.817	1050	14.6	nitrogen deposition	150			-0.012	0
418	Xu et al, 2014	32.8667	120.817	1050	14.6	nitrogen deposition	300			0.016	0.001
419	Xu et al, 2014	32.8667	120.817	1050	14.6	nitrogen deposition	100			-0.025	0
420	Xu et al, 2014	32.8667	120.817	1050	14.6	nitrogen deposition	100			0.01	0
421	Xu et al, 2014	32.8667	120.817	1050	14.6	nitrogen deposition	50			0	0
422	Xu et al, 2014	32.8667	120.817	1050	14.6	nitrogen deposition	300			0	0.001
423	Xu et al, 2014	32.8667	120.817	1050	14.6	nitrogen deposition	50			0.01	0
424	Xu et al, 2014	32.8667	120.817	1050	14.6	nitrogen deposition	100			0	0
425	Xu et al, 2014	32.8667	120.817	1050	14.6	nitrogen deposition	100			0.015	0
426	Xu et al, 2014	32.8667	120.817	1050	14.6	nitrogen deposition	100			0.012	0
427	Xu et al, 2014	32.8667	120.817	1050	14.6	nitrogen deposition	50			-0.004	0
428	Xu et al, 2014	32.8667	120.817	1050	14.6	nitrogen deposition	50			0.005	0
429	Xu et al, 2014	32.8667	120.817	1050	14.6	nitrogen deposition	150			0.015	0
430	Xu et al, 2014	32.8667	120.817	1050	14.6	nitrogen deposition	300			0.019	0
431	Xu et al, 2014	32.8667	120.817	1050	14.6	nitrogen deposition	300			-0.006	0
432	Xu et al, 2014	32.8667	120.817	1050	14.6	nitrogen deposition	150			0	0.001
433	Xu et al, 2014	32.8667	120.817	1050	14.6	nitrogen deposition	300			0.012	0
434	Xu et al, 2014	32.8667	120.817	1050	14.6	nitrogen deposition	300			0.02	0
435	Xu et al, 2014	32.8667	120.817	1050	14.6	nitrogen deposition	50			0.008	0
436	Xu et al, 2014	32.8667	120.817	1050	14.6	nitrogen deposition	150			0.023	0
437	Xu et al, 2014	32.8667	120.817	1050	14.6	nitrogen deposition	50			0	0
438	Xu et al, 2014	32.8667	120.817	1050	14.6	nitrogen deposition	100			0.023	0
439	Xu et al, 2014	32.8667	120.817	1050	14.6	nitrogen deposition	150			0.016	0
440	Xu et al, 2014	32.8667	120.817	1050	14.6	nitrogen deposition	300			0.02	0
441	Xu et al, 2014	32.8667	120.817	1050	14.6	nitrogen deposition	50			0	0
442	Xu et al, 2014	32.8667	120.817	1050	14.6	nitrogen deposition	50			0	0
443	Xu et al, 2014	32.8667	120.817	1050	14.6	nitrogen deposition	150			0.005	0
444	Xu et al, 2014	32.8667	120.817	1050	14.6	nitrogen deposition	300			0.024	0
445	Xu et al, 2014	32.8667	120.817	1050	14.6	nitrogen deposition	50			0.017	0
446	Xu et al, 2014	32.8667	120.817	1050	14.6	nitrogen deposition	100			0.017	0
447	Xu et al, 2014	32.8667	120.817	1050	14.6	nitrogen deposition	150			0.035	0
448	Xu et al, 2014	32.8667	120.817	1050	14.6	nitrogen deposition	300			0.035	0
449	Xu et al, 2014	32.8667	120.817	1050	14.6	nitrogen deposition	100			0	0
450	Xu et al, 2014	32.8667	120.817	1050	14.6	nitrogen deposition	100			0.008	0
451	Zhang et al, 2014	25.9167	110.4	1842	18.6	nitrogen deposition	50			-0.073	0.004
452	Zhang et al, 2014	25.9167	110.4	1842	18.6	nitrogen deposition	150			-0.2	0.008
453	Zhang et al, 2014	25.9167	110.4	1842	18.6	nitrogen deposition	100			-0.132	0.035
454	Rappe et al, 2013	60.9167	16.0167	584	4.3	nitrogen deposition	73			0.778	0.006
455	Rappe et al, 2013	60.9167	16.0167	584	4.3	nitrogen deposition	73			0.92	0.012
456	Rappe et al, 2013	60.9167	16.0167	584	4.3	nitrogen deposition	35			0.787	0.024
457	Rappe et al, 2013	60.9167	16.0167	584	4.3	nitrogen deposition	35			0.782	0.019
458	Zhang et al, 2013	30.0515	119.955	1341	16.7458	nitrogen deposition	50	0.265	0.102
459	Zhang et al, 2013	30.0515	119.955	1341	16.7458	nitrogen deposition	200	0.321	0.123
460	Zhang et al, 2013	30.0515	119.955	1341	16.7458	nitrogen deposition	100	0.421	0.11
461	Zhang et al, 2013	30.0598	119.952	1370	16.5625	nitrogen deposition	100	0.486	0.052
462	Zhang et al, 2013	30.0598	119.952	1370	16.5625	nitrogen deposition	200	0.629	0.039
463	Zhang et al, 2013	30.0598	119.952	1370	16.5625	nitrogen deposition	50	0.456	0.025
464	Zhang et al, 2013	30.0598	119.952	1370	16.5625	nitrogen deposition	50	0.126	0.044
465	Zhang et al, 2013	30.0598	119.952	1370	16.5625	nitrogen deposition	100	0.468	0.061
466	Zhang et al, 2013	30.0598	119.952	1370	16.5625	nitrogen deposition	200	0.468	0.078
467	Zhang et al, 2013	30.0598	119.952	1370	16.5625	nitrogen deposition	100	0.823	0.047
468	Zhang et al, 2013	30.0598	119.952	1370	16.5625	nitrogen deposition	50	0.597	0.052
469	Zhang et al, 2013	30.0598	119.952	1370	16.5625	nitrogen deposition	200	0.757	0.076
470	Guo et al, 2013	36.3	111.75	662	8.6	nitrogen deposition	50			0.298	0.015
471	Guo et al, 2013	36.3	111.75	662	8.6	nitrogen deposition	100			-0.072	0.012
472	Guo et al, 2013	36.3	111.75	662	8.6	nitrogen deposition	50			0.367	0.024
473	Guo et al, 2013	36.3	111.75	662	8.6	nitrogen deposition	100			-0.791	0.106
474	Guo et al, 2013	36.3	111.75	662	8.6	nitrogen deposition	150			-0.54	0.047
475	Guo et al, 2013	36.3	111.75	662	8.6	nitrogen deposition	150			-0.228	0.03
476	Li et al, 2013	23.15	112.5	1927	20.8667	nitrogen deposition	100			-0.033	0.002
477	Li et al, 2013	23.15	112.5	1927	20.8667	nitrogen deposition	50			0.008	0.003
478	Li et al, 2013	23.15	112.5	1927	20.8667	nitrogen deposition	50			0.022	0.006
479	Li et al, 2013	23.15	112.5	1927	20.8667	nitrogen deposition	100			-0.054	0.006
480	Yan et al, 2013	29.1667	118.05	1963.7	15.3	nitrogen deposition	100	0	0.003
481	Yan et al, 2013	29.1667	118.05	1963.7	15.3	nitrogen deposition	100	0.312	0.006
482	Yan et al, 2013	29.1667	118.05	1963.7	15.3	nitrogen deposition	100	0.292	0.004
483	Yan et al, 2013	29.1667	118.05	1963.7	15.3	nitrogen deposition	100	0.442	0.005
484	Zhang et al, 2012	22.5667	112.833	1534	22.5	nitrogen deposition	50			0.006	0.021
485	Zhang et al, 2012	22.5667	112.833	1534	22.5	nitrogen deposition	100			-0.032	0.011
486	Zhang et al, 2012	22.5667	112.833	1534	22.5	nitrogen deposition	100			0.038	0.006
487	Zhang et al, 2012	22.5667	112.833	1534	22.5	nitrogen deposition	50			-0.151	0.018
488	Zhao et al, 2012	31.6833	103.883	900	8.9	nitrogen deposition	250	0.328	0.003
489	Eller et al, 2011	45.55	-84.7833	815	6.225	nitrogen deposition	30	-0.282	0.015
490	Eller et al, 2011	45.55	-84.7833	815	6.225	nitrogen deposition	30	0.022	0.042
491	Watanabe et al, 2011	43	141	1452	3.0375	nitrogen deposition	30	0.223	0.027
492	Zhao et al, 2011	36.5167	102.467	387	5.14167	nitrogen deposition	50	0.135	0.002
493	Zhao et al, 2011	36.5167	102.467	387	5.14167	nitrogen deposition	50	0.33	0.008
494	Wu et al, 2011	29.2833	118.183	1963.7	15.3	nitrogen deposition	100	0	0.031
495	Wu et al, 2011	29.2833	118.183	1963.7	15.3	nitrogen deposition	100	0.134	0.027
496	Wu et al, 2011	29.2833	118.183	1963.7	15.3	nitrogen deposition	100	0.354	0.012
497	Wu et al, 2011	29.2833	118.183	1963.7	15.3	nitrogen deposition	100	0.297	0.01
498	Wu et al, 2011	29.2833	118.183	1963.7	15.3	nitrogen deposition	100	0.429	0.013
499	Dorr et al, 2010	51.5167	9.56667	805	8.24583	nitrogen deposition	22.5			-0.142	0.013
500	Dorr et al, 2010	51.5167	9.56667	805	8.24583	nitrogen deposition	22.5			-0.136	0.012
501	Dorr et al, 2010	51.5167	9.56667	805	8.24583	nitrogen deposition	22.5			0.003	0.001
502	Dorr et al, 2010	51.5167	9.56667	805	8.24583	nitrogen deposition	22.5			-0.068	0.01
503	Hu et al, 2010	45.35	127.5	723	2.95	nitrogen deposition	100			-0.106	0.017
504	Hu et al, 2010	45.35	127.5	723	2.95	nitrogen deposition	100			0.023	0.01
505	Zhao et al, 2009	31.6833	103.883	788	9.32917	nitrogen deposition	250	0.333	0.001
506	Zhao et al, 2009	31.6833	103.883	788	9.32917	nitrogen deposition	250	0.258	0.001
507	Duan et al, 2009	23.1667	113.35	1700	21.5	nitrogen deposition	100	0.464	0.107
508	Duan et al, 2009	23.1667	113.35	1700	21.5	nitrogen deposition	100	-0.059	0.051
[truncated: 63 more rows]

## Sheet: CO2 enrichment
No	References	Latitude	Longitude	Altitude(m)	MAP(mm)	MAT(°C)	Treatment		TB_RR	TB_var	SOCS_RR	SOCS_var
[truncated: 271 more rows]

[truncated: 1 more sheets: Warming]
